# Supplementary material for: In silico Identification of the Indispensable Quorum Sensing Proteins of Multidrug Resistant Proteus mirabilis
Source: Front Cell Infect Microbiol. 2018 Aug 7;8:269. doi: 10.3389/fcimb.2018.00269 (PMC6090301; doi:10.3389/fcimb.2018.00269)
Supplement: Supplementary file 2 [file Data_Sheet_2.XLS]

## Sheet: Legend_Sheet
	Supplementary Data 2:	The protein interactions involved in building the AIPS, AIPL, QSPO, QSPH, QSPV and GPIN.

## Sheet: AIPS
#node1	node2	node1_string_internal_id	node2_string_internal_id	node1_external_id	node2_external_id	neighborhood_on_chromosome	gene_fusion	phylogenetic_cooccurrence	homology	coexpression	experimentally_determined_interaction	database_annotated	automated_textmining	combined_score
luxS	mtnN	7101166	7101010	529507.PMI0379	529507.PMI0214	0.381	0	0.756	0	0	0	0.965	0.76	0.998
hpt	apt	7100959	7100937	529507.PMI0160	529507.PMI0138	0.075	0	0	0	0.087	0.215	0.8	0.48	0.918
PMI2902	fabD	7103618	7101632	529507.PMI2902	529507.PMI0860	0	0	0.778	0.69	0	0	0.8	0	0.847
PMI0336	mtnN	7101124	7101010	529507.PMI0336	529507.PMI0214	0.169	0.703	0	0	0	0	0	0	0.743
mtnN	btuF	7101010	7101009	529507.PMI0214	529507.PMI0213	0.711	0	0	0	0	0	0	0	0.712
dgt	mtnN	7101011	7101010	529507.PMI0215	529507.PMI0214	0.64	0	0	0	0	0	0	0	0.641
PMI2902	mtnN	7103618	7101010	529507.PMI2902	529507.PMI0214	0.381	0	0	0	0.424	0	0	0	0.628
fabD	mtnN	7101632	7101010	529507.PMI0860	529507.PMI0214	0.381	0	0	0	0.424	0	0	0	0.628
PMI2263	mtnN	7102996	7101010	529507.PMI2263	529507.PMI0214	0.051	0	0	0	0	0	0.579	0	0.583
mtnN	hpt	7101010	7100959	529507.PMI0214	529507.PMI0160	0	0	0	0	0.099	0	0.536	0.044	0.565
mtnN	apt	7101010	7100937	529507.PMI0214	529507.PMI0138	0.381	0	0.198	0	0	0	0.118	0.114	0.56
PMI3524	mtnN	7104216	7101010	529507.PMI3524	529507.PMI0214	0.131	0	0	0	0	0	0.495	0	0.542
dgt	btuF	7101011	7101009	529507.PMI0215	529507.PMI0213	0.456	0	0	0	0	0	0	0	0.456
PMI3524	apt	7104216	7100937	529507.PMI3524	529507.PMI0138	0.381	0	0	0	0	0	0	0.124	0.434
mnmC	PMI1774	7102540	7102519	529507.PMI1796	529507.PMI1774	0.371	0	0	0	0.226	0	0.733	0.109	0.868
mnmC	dadB	7102540	7102254	529507.PMI1796	529507.PMI1508	0.371	0	0	0	0.226	0	0.733	0.109	0.868
alr	mnmC	7103458	7102540	529507.PMI2742	529507.PMI1796	0.371	0	0	0	0.226	0	0.733	0.109	0.868
alr	PMI1774	7103458	7102519	529507.PMI2742	529507.PMI1774	0	0	0.701	0.63	0	0	0.8	0.109	0.854
PMI1774	dadB	7102519	7102254	529507.PMI1774	529507.PMI1508	0	0	0.707	0.653	0	0	0.8	0.109	0.851
metG	thiI	7101430	7100896	529507.PMI0646	529507.PMI0097	0.272	0	0	0	0.102	0	0	0.768	0.835
mnmC	metG	7102540	7101430	529507.PMI1796	529507.PMI0646	0.047	0	0.206	0	0.063	0	0	0.786	0.827
alr	dadB	7103458	7102254	529507.PMI2742	529507.PMI1508	0	0	0.778	0.876	0	0	0.8	0	0.819
birA	gcvP	7103949	7102757	529507.PMI3249	529507.PMI2019	0	0	0	0	0	0	0	0.815	0.815
birA	mnmC	7103949	7102540	529507.PMI3249	529507.PMI1796	0.054	0	0	0	0.061	0	0	0.786	0.793
fadH	gcvP	7104392	7102757	529507.PMI3702	529507.PMI2019	0.061	0	0	0	0	0	0.752	0.177	0.791
gcvP	mnmC	7102757	7102540	529507.PMI2019	529507.PMI1796	0	0	0	0	0.06	0	0.752	0.122	0.777
mnmC	thiI	7102540	7100896	529507.PMI1796	529507.PMI0097	0.063	0	0	0	0	0	0	0.743	0.748
rlmL	thiI	7101553	7100896	529507.PMI0774	529507.PMI0097	0.373	0	0.195	0	0.41	0	0	0.176	0.721
mnmC	rlmL	7102540	7101553	529507.PMI1796	529507.PMI0774	0.401	0	0	0	0.13	0.438	0	0	0.681
mnmC	fabB	7102540	7102539	529507.PMI1796	529507.PMI1795	0.67	0	0	0	0.062	0	0	0	0.677
fadH	mnmC	7104392	7102540	529507.PMI3702	529507.PMI1796	0.372	0	0	0	0.063	0.448	0	0.12	0.675
fadH	thiI	7104392	7100896	529507.PMI3702	529507.PMI0097	0.416	0	0	0	0.064	0	0	0.404	0.645
birA	fabB	7103949	7102539	529507.PMI3249	529507.PMI1795	0.386	0	0.189	0	0.063	0	0	0.116	0.532
birA	metG	7103949	7101430	529507.PMI3249	529507.PMI0646	0.131	0	0.15	0	0	0.182	0	0.165	0.427
cysJ	cysI	7102983	7102982	529507.PMI2250	529507.PMI2249	0.89	0.233	0.778	0	0.837	0.494	0.931	0.811	0.999
cysE	cysK	7103886	7102569	529507.PMI3185	529507.PMI1827	0.381	0	0.751	0	0.069	0.586	0.965	0.677	0.999
cysI	cysK	7102982	7102569	529507.PMI2249	529507.PMI1827	0.304	0	0	0	0.228	0	0.965	0.734	0.994
PMI3186	cysK	7103887	7102569	529507.PMI3186	529507.PMI1827	0.381	0	0.507	0	0.069	0.461	0.955	0.109	0.992
metB	cysK	7103923	7102569	529507.PMI3223	529507.PMI1827	0.381	0.001	0.182	0	0.118	0.215	0.965	0.39	0.991
metH	PMI0626	7103474	7101410	529507.PMI2758	529507.PMI0626	0.303	0	0	0	0.063	0	0.974	0.495	0.99
metH	PMI0028	7103474	7100830	529507.PMI2758	529507.PMI0028	0.303	0	0	0	0.063	0	0.974	0.495	0.99
metB	metH	7103923	7103474	529507.PMI3223	529507.PMI2758	0.303	0	0	0	0.063	0	0.974	0.495	0.99
cysJ	cysK	7102983	7102569	529507.PMI2250	529507.PMI1827	0.092	0	0	0	0.225	0.125	0.965	0.524	0.988
cysK	PMI0028	7102569	7100830	529507.PMI1827	529507.PMI0028	0.381	0	0.18	0	0.118	0.215	0.956	0.211	0.985
cysK	PMI0626	7102569	7101410	529507.PMI1827	529507.PMI0626	0.381	0.001	0.174	0	0.118	0.215	0.956	0.211	0.984
metB	PMI0028	7103923	7100830	529507.PMI3223	529507.PMI0028	0	0	0.778	0.72	0.083	0	0.965	0.638	0.978
metB	PMI0626	7103923	7101410	529507.PMI3223	529507.PMI0626	0	0	0.778	0.721	0.083	0	0.965	0.639	0.978
metB	cysI	7103923	7102982	529507.PMI3223	529507.PMI2249	0.063	0	0	0	0.081	0.122	0.956	0.293	0.972
cysI	PMI0794	7102982	7101571	529507.PMI2249	529507.PMI0794	0	0	0	0	0	0	0.965	0	0.965
cysK	PMI0794	7102569	7101571	529507.PMI1827	529507.PMI0794	0	0	0	0	0	0	0.965	0	0.965
cysJ	PMI0794	7102983	7101571	529507.PMI2250	529507.PMI0794	0	0	0	0	0	0	0.965	0	0.965
cysI	phsA	7102982	7102558	529507.PMI2249	529507.PMI1814	0.131	0	0	0	0	0	0.951	0.158	0.961
metB	cysJ	7103923	7102983	529507.PMI3223	529507.PMI2250	0.043	0	0	0	0.076	0	0.956	0.069	0.959
PMI3186	cysE	7103887	7103886	529507.PMI3186	529507.PMI3185	0.859	0	0.72	0	0	0	0	0	0.958
metH	cysK	7103474	7102569	529507.PMI2758	529507.PMI1827	0.059	0	0	0	0.065	0	0.911	0.486	0.954
cysK	phsA	7102569	7102558	529507.PMI1827	529507.PMI1814	0	0	0	0	0	0	0.951	0.061	0.952
phsA	PMI0794	7102558	7101571	529507.PMI1814	529507.PMI0794	0	0	0	0	0	0	0.947	0	0.947
cysJ	phsA	7102983	7102558	529507.PMI2250	529507.PMI1814	0.101	0.003	0	0	0	0	0.9	0.389	0.94
metB	phsA	7103923	7102558	529507.PMI3223	529507.PMI1814	0	0	0	0	0	0	0.9	0	0.9
metH	cysJ	7103474	7102983	529507.PMI2758	529507.PMI2250	0	0	0	0	0.065	0.215	0.752	0.171	0.828
PMI0626	PMI0028	7101410	7100830	529507.PMI0626	529507.PMI0028	0	0	0.778	0.879	0	0	0.8	0	0.818
cysI	PMI0028	7102982	7100830	529507.PMI2249	529507.PMI0028	0.063	0	0	0	0.081	0.122	0.581	0.422	0.783
cysI	PMI0626	7102982	7101410	529507.PMI2249	529507.PMI0626	0.063	0	0	0	0.081	0.122	0.581	0.422	0.783
metB	cysE	7103923	7103886	529507.PMI3223	529507.PMI3185	0.381	0	0	0	0	0	0.339	0.46	0.76
cysE	PMI0626	7103886	7101410	529507.PMI3185	529507.PMI0626	0.381	0	0	0	0	0	0.244	0.461	0.726
cysE	PMI0028	7103886	7100830	529507.PMI3185	529507.PMI0028	0.381	0	0	0	0	0	0.244	0.46	0.725
cysJ	PMI0626	7102983	7101410	529507.PMI2250	529507.PMI0626	0.043	0	0	0	0.076	0	0.581	0.227	0.675
cysJ	PMI0028	7102983	7100830	529507.PMI2250	529507.PMI0028	0.043	0	0	0	0.076	0	0.581	0.227	0.675
cysE	cysI	7103886	7102982	529507.PMI3185	529507.PMI2249	0.121	0	0	0	0.048	0	0	0.595	0.631
cysE	cysJ	7103886	7102983	529507.PMI3185	529507.PMI2250	0.1	0	0	0	0	0	0	0.482	0.514
metB	PMI3186	7103923	7103887	529507.PMI3223	529507.PMI3186	0.381	0	0	0	0	0	0.105	0.109	0.463
PMI3186	PMI0028	7103887	7100830	529507.PMI3186	529507.PMI0028	0.381	0	0	0	0	0	0.105	0.109	0.463
PMI3186	PMI0626	7103887	7101410	529507.PMI3186	529507.PMI0626	0.381	0	0	0	0	0	0.105	0.109	0.463
luxS	mtnN	7101166	7101010	529507.PMI0379	529507.PMI0214	0.381	0	0.756	0	0	0	0.965	0.76	0.998
metE	metB	7104221	7103923	529507.PMI3529	529507.PMI3223	0.302	0	0	0	0.129	0	0.965	0.807	0.995
metH	PMI2726	7103474	7103442	529507.PMI2758	529507.PMI2726	0.46	0	0	0	0	0	0.974	0.451	0.991
metB	cysK	7103923	7102569	529507.PMI3223	529507.PMI1827	0.381	0.001	0.182	0	0.118	0.215	0.965	0.39	0.991
metB	PMI0235	7103923	7101031	529507.PMI3223	529507.PMI0235	0.381	0.008	0.31	0	0.118	0.215	0.963	0.278	0.99
metH	PMI0028	7103474	7100830	529507.PMI2758	529507.PMI0028	0.303	0	0	0	0.063	0	0.974	0.495	0.99
metB	metH	7103923	7103474	529507.PMI3223	529507.PMI2758	0.303	0	0	0	0.063	0	0.974	0.495	0.99
metH	PMI0626	7103474	7101410	529507.PMI2758	529507.PMI0626	0.303	0	0	0	0.063	0	0.974	0.495	0.99
metE	PMI0626	7104221	7101410	529507.PMI3529	529507.PMI0626	0.302	0	0	0	0.128	0	0.965	0.454	0.987
metE	PMI0028	7104221	7100830	529507.PMI3529	529507.PMI0028	0.302	0	0	0	0.128	0	0.965	0.454	0.987
cysK	PMI0028	7102569	7100830	529507.PMI1827	529507.PMI0028	0.381	0	0.18	0	0.118	0.215	0.956	0.211	0.985
metH	luxS	7103474	7101166	529507.PMI2758	529507.PMI0379	0.381	0	0	0	0	0	0.974	0.176	0.985
cysK	PMI0626	7102569	7101410	529507.PMI1827	529507.PMI0626	0.381	0.001	0.174	0	0.118	0.215	0.956	0.211	0.984
metB	PMI1275	7103923	7102021	529507.PMI3223	529507.PMI1275	0.381	0	0	0	0	0	0.965	0.177	0.981
metE	metH	7104221	7103474	529507.PMI3529	529507.PMI2758	0.386	0	0	0	0.1	0	0.894	0.682	0.979
metE	luxS	7104221	7101166	529507.PMI3529	529507.PMI0379	0.302	0	0	0	0	0	0.965	0.186	0.978
metB	PMI0028	7103923	7100830	529507.PMI3223	529507.PMI0028	0	0	0.778	0.72	0.083	0	0.965	0.638	0.978
metB	PMI0626	7103923	7101410	529507.PMI3223	529507.PMI0626	0	0	0.778	0.721	0.083	0	0.965	0.639	0.978
metH	PMI0235	7103474	7101031	529507.PMI2758	529507.PMI0235	0.059	0	0	0	0.065	0	0.955	0.486	0.977
metH	PMI1275	7103474	7102021	529507.PMI2758	529507.PMI1275	0	0	0	0	0	0	0.974	0.098	0.975
PMI2726	PMI0235	7103442	7101031	529507.PMI2726	529507.PMI0235	0.381	0.003	0	0	0.062	0	0.956	0.147	0.975
metE	PMI2726	7104221	7103442	529507.PMI3529	529507.PMI2726	0.133	0	0	0	0.149	0	0.965	0.12	0.974
PMI2726	PMI0626	7103442	7101410	529507.PMI2726	529507.PMI0626	0.117	0	0.736	0.683	0.084	0	0.956	0.177	0.971
PMI2726	PMI0028	7103442	7100830	529507.PMI2726	529507.PMI0028	0.117	0	0.704	0.677	0.084	0	0.956	0.177	0.971
metB	PMI2726	7103923	7103442	529507.PMI3223	529507.PMI2726	0.117	0	0.775	0.796	0.064	0	0.956	0.231	0.968
metE	PMI1275	7104221	7102021	529507.PMI3529	529507.PMI1275	0.061	0	0	0	0	0	0.965	0.071	0.967
PMI2726	PMI1275	7103442	7102021	529507.PMI2726	529507.PMI1275	0.064	0	0.151	0	0	0	0.956	0.061	0.963
metE	PMI0235	7104221	7101031	529507.PMI3529	529507.PMI0235	0	0	0	0	0.063	0	0.952	0.142	0.958
metH	cysK	7103474	7102569	529507.PMI2758	529507.PMI1827	0.059	0	0	0	0.065	0	0.911	0.486	0.954
PMI1275	PMI0028	7102021	7100830	529507.PMI1275	529507.PMI0028	0.381	0	0	0	0	0	0.912	0.177	0.951
PMI1275	PMI0626	7102021	7101410	529507.PMI1275	529507.PMI0626	0.381	0	0	0	0	0	0.912	0.177	0.951
PMI2726	cysK	7103442	7102569	529507.PMI2726	529507.PMI1827	0.381	0	0	0	0.062	0	0.912	0.147	0.95
metB	luxS	7103923	7101166	529507.PMI3223	529507.PMI0379	0.381	0	0	0	0	0	0.9	0.224	0.947
luxS	PMI0028	7101166	7100830	529507.PMI0379	529507.PMI0028	0.381	0	0	0	0	0	0.9	0.127	0.941
PMI0626	luxS	7101410	7101166	529507.PMI0626	529507.PMI0379	0.381	0	0	0	0	0	0.9	0.127	0.941
luxS	PMI0235	7101166	7101031	529507.PMI0379	529507.PMI0235	0.322	0	0	0	0	0	0.9	0.21	0.941
cysK	luxS	7102569	7101166	529507.PMI1827	529507.PMI0379	0.322	0	0	0	0	0	0.8	0.476	0.922
cysK	PMI1275	7102569	7102021	529507.PMI1827	529507.PMI1275	0.096	0	0	0	0	0	0.9	0.128	0.914
PMI1275	luxS	7102021	7101166	529507.PMI1275	529507.PMI0379	0.05	0	0	0	0	0	0.9	0.089	0.905
PMI2726	luxS	7103442	7101166	529507.PMI2726	529507.PMI0379	0.043	0	0	0	0	0	0.9	0	0.9
metE	cysK	7104221	7102569	529507.PMI3529	529507.PMI1827	0	0	0	0	0.063	0	0.862	0.19	0.886
PMI0626	PMI0235	7101410	7101031	529507.PMI0626	529507.PMI0235	0.381	0.006	0.208	0	0.118	0.215	0.581	0.211	0.861
PMI0235	PMI0028	7101031	7100830	529507.PMI0235	529507.PMI0028	0.381	0.003	0.169	0	0.118	0.215	0.581	0.211	0.854
cysK	PMI0235	7102569	7101031	529507.PMI1827	529507.PMI0235	0	0	0.775	0.686	0	0	0.8	0	0.848
PMI0626	PMI0028	7101410	7100830	529507.PMI0626	529507.PMI0028	0	0	0.778	0.879	0	0	0.8	0	0.818
cysK	mtnN	7102569	7101010	529507.PMI1827	529507.PMI0214	0.059	0	0	0	0	0	0	0.459	0.469
metB	mtnN	7103923	7101010	529507.PMI3223	529507.PMI0214	0.046	0	0	0	0	0	0	0.459	0.461
metE	metB	7104221	7103923	529507.PMI3529	529507.PMI3223	0.302	0	0	0	0.129	0	0.965	0.807	0.995
metB	metA	7103923	7103481	529507.PMI3223	529507.PMI2765	0.381	0	0.185	0	0.393	0	0.965	0.629	0.995
metL	metB	7103924	7103923	529507.PMI3224	529507.PMI3223	0.908	0	0	0	0.475	0.119	0.8	0.475	0.994
metB	cysK	7103923	7102569	529507.PMI3223	529507.PMI1827	0.381	0.001	0.182	0	0.118	0.215	0.965	0.39	0.991
metH	PMI0626	7103474	7101410	529507.PMI2758	529507.PMI0626	0.303	0	0	0	0.063	0	0.974	0.495	0.99
metB	metH	7103923	7103474	529507.PMI3223	529507.PMI2758	0.303	0	0	0	0.063	0	0.974	0.495	0.99
metB	cysM	7103923	7102573	529507.PMI3223	529507.PMI1831	0.381	0.003	0.158	0	0.118	0.215	0.965	0.365	0.99
metH	PMI0028	7103474	7100830	529507.PMI2758	529507.PMI0028	0.303	0	0	0	0.063	0	0.974	0.495	0.99
metL	metA	7103924	7103481	529507.PMI3224	529507.PMI2765	0.375	0	0	0	0.165	0	0.974	0.381	0.99
metB	PMI0235	7103923	7101031	529507.PMI3223	529507.PMI0235	0.381	0.008	0.31	0	0.118	0.215	0.963	0.278	0.99
metE	PMI0626	7104221	7101410	529507.PMI3529	529507.PMI0626	0.302	0	0	0	0.128	0	0.965	0.454	0.987
metE	PMI0028	7104221	7100830	529507.PMI3529	529507.PMI0028	0.302	0	0	0	0.128	0	0.965	0.454	0.987
cysK	PMI0028	7102569	7100830	529507.PMI1827	529507.PMI0028	0.381	0	0.18	0	0.118	0.215	0.956	0.211	0.985
cysM	PMI0028	7102573	7100830	529507.PMI1831	529507.PMI0028	0.381	0.001	0	0	0.118	0.215	0.956	0.299	0.984
cysK	PMI0626	7102569	7101410	529507.PMI1827	529507.PMI0626	0.381	0.001	0.174	0	0.118	0.215	0.956	0.211	0.984
cysM	PMI0626	7102573	7101410	529507.PMI1831	529507.PMI0626	0.381	0.002	0	0	0.118	0.215	0.956	0.299	0.984
metB	PMI1275	7103923	7102021	529507.PMI3223	529507.PMI1275	0.381	0	0	0	0	0	0.965	0.177	0.981
metE	metH	7104221	7103474	529507.PMI3529	529507.PMI2758	0.386	0	0	0	0.1	0	0.894	0.682	0.979
metB	PMI0028	7103923	7100830	529507.PMI3223	529507.PMI0028	0	0	0.778	0.72	0.083	0	0.965	0.638	0.978
metB	PMI0626	7103923	7101410	529507.PMI3223	529507.PMI0626	0	0	0.778	0.721	0.083	0	0.965	0.639	0.978
metH	PMI0235	7103474	7101031	529507.PMI2758	529507.PMI0235	0.059	0	0	0	0.065	0	0.955	0.486	0.977
metL	metH	7103924	7103474	529507.PMI3224	529507.PMI2758	0.479	0	0	0	0.063	0	0.8	0.786	0.976
metH	PMI1275	7103474	7102021	529507.PMI2758	529507.PMI1275	0	0	0	0	0	0	0.974	0.098	0.975
metE	PMI1275	7104221	7102021	529507.PMI3529	529507.PMI1275	0.061	0	0	0	0	0	0.965	0.071	0.967
metL	PMI0626	7103924	7101410	529507.PMI3224	529507.PMI0626	0.433	0	0	0	0.475	0.119	0.8	0.475	0.967
metL	PMI0028	7103924	7100830	529507.PMI3224	529507.PMI0028	0.433	0	0	0	0.475	0.119	0.8	0.475	0.967
metE	PMI0235	7104221	7101031	529507.PMI3529	529507.PMI0235	0	0	0	0	0.063	0	0.952	0.142	0.958
metH	cysK	7103474	7102569	529507.PMI2758	529507.PMI1827	0.059	0	0	0	0.065	0	0.911	0.486	0.954
metH	cysM	7103474	7102573	529507.PMI2758	529507.PMI1831	0.059	0	0	0	0.065	0	0.911	0.486	0.954
PMI1275	PMI0626	7102021	7101410	529507.PMI1275	529507.PMI0626	0.381	0	0	0	0	0	0.912	0.177	0.951
PMI1275	PMI0028	7102021	7100830	529507.PMI1275	529507.PMI0028	0.381	0	0	0	0	0	0.912	0.177	0.951
metL	PMI1275	7103924	7102021	529507.PMI3224	529507.PMI1275	0	0	0	0	0	0	0.922	0.064	0.924
cysK	PMI1275	7102569	7102021	529507.PMI1827	529507.PMI1275	0.096	0	0	0	0	0	0.9	0.128	0.914
cysM	PMI1275	7102573	7102021	529507.PMI1831	529507.PMI1275	0.096	0	0	0	0	0	0.9	0.128	0.914
metL	PMI0235	7103924	7101031	529507.PMI3224	529507.PMI0235	0.099	0	0	0	0.129	0	0.8	0.431	0.898
metA	PMI0028	7103481	7100830	529507.PMI2765	529507.PMI0028	0.381	0	0.175	0	0.18	0	0.584	0.489	0.894
metE	metL	7104221	7103924	529507.PMI3529	529507.PMI3224	0.061	0	0	0	0.151	0	0.8	0.407	0.892
metA	PMI0626	7103481	7101410	529507.PMI2765	529507.PMI0626	0.381	0	0.16	0	0.18	0	0.584	0.489	0.892
metA	PMI0235	7103481	7101031	529507.PMI2765	529507.PMI0235	0.381	0	0	0	0	0	0.8	0.177	0.889
metE	cysK	7104221	7102569	529507.PMI3529	529507.PMI1827	0	0	0	0	0.063	0	0.862	0.19	0.886
metE	cysM	7104221	7102573	529507.PMI3529	529507.PMI1831	0	0	0	0	0.063	0	0.862	0.171	0.883
PMI0626	PMI0235	7101410	7101031	529507.PMI0626	529507.PMI0235	0.381	0.006	0.208	0	0.118	0.215	0.581	0.211	0.861
PMI0235	PMI0028	7101031	7100830	529507.PMI0235	529507.PMI0028	0.381	0.003	0.169	0	0.118	0.215	0.581	0.211	0.854
cysK	PMI0235	7102569	7101031	529507.PMI1827	529507.PMI0235	0	0	0.775	0.686	0	0	0.8	0	0.848
cysM	PMI0235	7102573	7101031	529507.PMI1831	529507.PMI0235	0	0	0.776	0.706	0	0	0.8	0	0.845
cysM	cysK	7102573	7102569	529507.PMI1831	529507.PMI1827	0	0	0.778	0.824	0	0	0.8	0.396	0.838
PMI0626	PMI0028	7101410	7100830	529507.PMI0626	529507.PMI0028	0	0	0.778	0.879	0	0	0.8	0	0.818
metA	metH	7103481	7103474	529507.PMI2765	529507.PMI2758	0.433	0	0	0	0	0	0	0.383	0.635
metA	cysM	7103481	7102573	529507.PMI2765	529507.PMI1831	0.381	0	0	0	0	0	0	0.29	0.541
metE	metA	7104221	7103481	529507.PMI3529	529507.PMI2765	0.06	0	0	0	0.177	0	0	0.452	0.539
metA	cysK	7103481	7102569	529507.PMI2765	529507.PMI1827	0.381	0	0	0	0	0	0	0.267	0.527
metL	cysK	7103924	7102569	529507.PMI3224	529507.PMI1827	0.099	0	0	0	0.129	0	0	0.431	0.514
metL	cysM	7103924	7102573	529507.PMI3224	529507.PMI1831	0.099	0	0	0	0.129	0	0	0.431	0.514
metF	metH	7103648	7103474	529507.PMI2932	529507.PMI2758	0.478	0	0	0	0.641	0	0.974	0.587	0.997
metH	metK	7103474	7102829	529507.PMI2758	529507.PMI2095	0.407	0	0	0	0.127	0	0.974	0.495	0.992
metH	PMI2726	7103474	7103442	529507.PMI2758	529507.PMI2726	0.46	0	0	0	0	0	0.974	0.451	0.991
metH	PMI0626	7103474	7101410	529507.PMI2758	529507.PMI0626	0.303	0	0	0	0.063	0	0.974	0.495	0.99
metH	PMI0028	7103474	7100830	529507.PMI2758	529507.PMI0028	0.303	0	0	0	0.063	0	0.974	0.495	0.99
metH	PMI1248	7103474	7101994	529507.PMI2758	529507.PMI1248	0.303	0	0	0	0.063	0	0.974	0.495	0.99
metH	mdeA	7103474	7102987	529507.PMI2758	529507.PMI2254	0.303	0	0	0	0.063	0	0.974	0.495	0.99
metB	metH	7103923	7103474	529507.PMI3223	529507.PMI2758	0.303	0	0	0	0.063	0	0.974	0.495	0.99
metF	glyA	7103648	7102609	529507.PMI2932	529507.PMI1867	0.061	0	0	0	0.131	0	0.965	0.558	0.986
metH	glyA	7103474	7102609	529507.PMI2758	529507.PMI1867	0.044	0	0	0	0.069	0	0.974	0.493	0.986
metH	luxS	7103474	7101166	529507.PMI2758	529507.PMI0379	0.381	0	0	0	0	0	0.974	0.176	0.985
metB	PMI0626	7103923	7101410	529507.PMI3223	529507.PMI0626	0	0	0.778	0.721	0.083	0	0.965	0.639	0.978
metB	PMI0028	7103923	7100830	529507.PMI3223	529507.PMI0028	0	0	0.778	0.72	0.083	0	0.965	0.638	0.978
mdeA	metK	7102987	7102829	529507.PMI2254	529507.PMI2095	0.044	0	0	0	0.114	0.454	0.9	0.567	0.976
metK	PMI1248	7102829	7101994	529507.PMI2095	529507.PMI1248	0.044	0	0	0	0.114	0.454	0.9	0.567	0.976
PMI2726	PMI0626	7103442	7101410	529507.PMI2726	529507.PMI0626	0.117	0	0.736	0.683	0.084	0	0.956	0.177	0.971
PMI2726	PMI0028	7103442	7100830	529507.PMI2726	529507.PMI0028	0.117	0	0.704	0.677	0.084	0	0.956	0.177	0.971
metB	PMI2726	7103923	7103442	529507.PMI3223	529507.PMI2726	0.117	0	0.775	0.796	0.064	0	0.956	0.231	0.968
metB	metF	7103923	7103648	529507.PMI3223	529507.PMI2932	0.381	0	0	0	0.48	0.215	0.539	0.665	0.953
metB	luxS	7103923	7101166	529507.PMI3223	529507.PMI0379	0.381	0	0	0	0	0	0.9	0.224	0.947
luxS	PMI0028	7101166	7100830	529507.PMI0379	529507.PMI0028	0.381	0	0	0	0	0	0.9	0.127	0.941
PMI0626	luxS	7101410	7101166	529507.PMI0626	529507.PMI0379	0.381	0	0	0	0	0	0.9	0.127	0.941
metF	mdeA	7103648	7102987	529507.PMI2932	529507.PMI2254	0.381	0	0	0	0.48	0.215	0.539	0.47	0.927
metF	PMI1248	7103648	7101994	529507.PMI2932	529507.PMI1248	0.381	0	0	0	0.48	0.215	0.539	0.47	0.927
metF	PMI0028	7103648	7100830	529507.PMI2932	529507.PMI0028	0.381	0	0	0	0.282	0.215	0.539	0.478	0.9
metF	PMI0626	7103648	7101410	529507.PMI2932	529507.PMI0626	0.381	0	0	0	0.282	0.215	0.539	0.478	0.9
PMI2726	luxS	7103442	7101166	529507.PMI2726	529507.PMI0379	0.043	0	0	0	0	0	0.9	0	0.9
metF	metK	7103648	7102829	529507.PMI2932	529507.PMI2095	0.381	0	0	0	0.341	0	0.539	0.462	0.885
mdeA	PMI1248	7102987	7101994	529507.PMI2254	529507.PMI1248	0	0	0.778	0.829	0	0	0.8	0	0.826
PMI0626	PMI0028	7101410	7100830	529507.PMI0626	529507.PMI0028	0	0	0.778	0.879	0	0	0.8	0	0.818
PMI1248	PMI0626	7101994	7101410	529507.PMI1248	529507.PMI0626	0	0	0.777	0.651	0.083	0	0.673	0.453	0.805
PMI1248	PMI0028	7101994	7100830	529507.PMI1248	529507.PMI0028	0	0	0.776	0.696	0.083	0	0.673	0.453	0.791
mdeA	PMI0028	7102987	7100830	529507.PMI2254	529507.PMI0028	0	0	0.778	0.744	0.083	0	0.673	0.453	0.776
metB	metK	7103923	7102829	529507.PMI3223	529507.PMI2095	0.044	0	0	0	0.114	0.454	0	0.567	0.772
mdeA	PMI0626	7102987	7101410	529507.PMI2254	529507.PMI0626	0	0	0.778	0.759	0.083	0	0.673	0.453	0.771
metF	PMI2726	7103648	7103442	529507.PMI2932	529507.PMI2726	0.381	0	0	0	0.059	0	0.537	0.111	0.728
PMI2726	PMI1248	7103442	7101994	529507.PMI2726	529507.PMI1248	0.117	0	0.77	0.766	0.064	0	0.581	0.231	0.704
PMI2726	mdeA	7103442	7102987	529507.PMI2726	529507.PMI2254	0.117	0	0.778	0.891	0.064	0	0.581	0.231	0.662
metK	PMI0626	7102829	7101410	529507.PMI2095	529507.PMI0626	0.044	0	0	0	0.114	0.454	0	0.281	0.622
metK	PMI0028	7102829	7100830	529507.PMI2095	529507.PMI0028	0.044	0	0	0	0.114	0.454	0	0.281	0.622
metK	glyA	7102829	7102609	529507.PMI2095	529507.PMI1867	0.042	0	0	0	0.26	0.123	0	0.455	0.615
metK	luxS	7102829	7101166	529507.PMI2095	529507.PMI0379	0.087	0	0	0	0	0	0	0.497	0.521
mdeA	luxS	7102987	7101166	529507.PMI2254	529507.PMI0379	0.381	0	0	0	0	0	0	0.164	0.46
PMI1248	luxS	7101994	7101166	529507.PMI1248	529507.PMI0379	0.381	0	0	0	0	0	0	0.127	0.436
metL	thrA	7103924	7100803	529507.PMI3224	529507.PMI0001	0.478	0	0.777	0.691	0.927	0.897	0.947	0.494	0.999
metE	metB	7104221	7103923	529507.PMI3529	529507.PMI3223	0.302	0	0	0	0.129	0	0.965	0.807	0.995
metL	metB	7103924	7103923	529507.PMI3224	529507.PMI3223	0.908	0	0	0	0.475	0.119	0.8	0.475	0.994
metB	cysK	7103923	7102569	529507.PMI3223	529507.PMI1827	0.381	0.001	0.182	0	0.118	0.215	0.965	0.39	0.991
metH	PMI2726	7103474	7103442	529507.PMI2758	529507.PMI2726	0.46	0	0	0	0	0	0.974	0.451	0.991
metB	cysM	7103923	7102573	529507.PMI3223	529507.PMI1831	0.381	0.003	0.158	0	0.118	0.215	0.965	0.365	0.99
metH	PMI0626	7103474	7101410	529507.PMI2758	529507.PMI0626	0.303	0	0	0	0.063	0	0.974	0.495	0.99
metB	metH	7103923	7103474	529507.PMI3223	529507.PMI2758	0.303	0	0	0	0.063	0	0.974	0.495	0.99
metE	PMI0626	7104221	7101410	529507.PMI3529	529507.PMI0626	0.302	0	0	0	0.128	0	0.965	0.454	0.987
cysK	PMI0626	7102569	7101410	529507.PMI1827	529507.PMI0626	0.381	0.001	0.174	0	0.118	0.215	0.956	0.211	0.984
cysM	PMI0626	7102573	7101410	529507.PMI1831	529507.PMI0626	0.381	0.002	0	0	0.118	0.215	0.956	0.299	0.984
metB	PMI1275	7103923	7102021	529507.PMI3223	529507.PMI1275	0.381	0	0	0	0	0	0.965	0.177	0.981
metE	metH	7104221	7103474	529507.PMI3529	529507.PMI2758	0.386	0	0	0	0.1	0	0.894	0.682	0.979
metB	PMI0626	7103923	7101410	529507.PMI3223	529507.PMI0626	0	0	0.778	0.721	0.083	0	0.965	0.639	0.978
metH	thrA	7103474	7100803	529507.PMI2758	529507.PMI0001	0.479	0	0	0	0.063	0	0.8	0.786	0.976
metL	metH	7103924	7103474	529507.PMI3224	529507.PMI2758	0.479	0	0	0	0.063	0	0.8	0.786	0.976
metH	PMI1275	7103474	7102021	529507.PMI2758	529507.PMI1275	0	0	0	0	0	0	0.974	0.098	0.975
metE	PMI2726	7104221	7103442	529507.PMI3529	529507.PMI2726	0.133	0	0	0	0.149	0	0.965	0.12	0.974
PMI0626	sseA	7101410	7101407	529507.PMI0626	529507.PMI0623	0.597	0.285	0	0	0.081	0	0.9	0.11	0.972
PMI2726	PMI0626	7103442	7101410	529507.PMI2726	529507.PMI0626	0.117	0	0.736	0.683	0.084	0	0.956	0.177	0.971
metB	PMI2726	7103923	7103442	529507.PMI3223	529507.PMI2726	0.117	0	0.775	0.796	0.064	0	0.956	0.231	0.968
metE	PMI1275	7104221	7102021	529507.PMI3529	529507.PMI1275	0.061	0	0	0	0	0	0.965	0.071	0.967
metL	PMI0626	7103924	7101410	529507.PMI3224	529507.PMI0626	0.433	0	0	0	0.475	0.119	0.8	0.475	0.967
PMI0626	thrA	7101410	7100803	529507.PMI0626	529507.PMI0001	0.433	0	0	0	0.475	0.119	0.8	0.475	0.967
metB	thrA	7103923	7100803	529507.PMI3223	529507.PMI0001	0.433	0	0	0	0.475	0.119	0.8	0.475	0.967
PMI2726	PMI1275	7103442	7102021	529507.PMI2726	529507.PMI1275	0.064	0	0.151	0	0	0	0.956	0.061	0.963
PMI2726	thrA	7103442	7100803	529507.PMI2726	529507.PMI0001	0.438	0	0	0	0.061	0	0.914	0.129	0.955
metL	PMI2726	7103924	7103442	529507.PMI3224	529507.PMI2726	0.438	0	0	0	0.061	0	0.914	0.129	0.955
metH	cysK	7103474	7102569	529507.PMI2758	529507.PMI1827	0.059	0	0	0	0.065	0	0.911	0.486	0.954
metH	cysM	7103474	7102573	529507.PMI2758	529507.PMI1831	0.059	0	0	0	0.065	0	0.911	0.486	0.954
PMI1275	PMI0626	7102021	7101410	529507.PMI1275	529507.PMI0626	0.381	0	0	0	0	0	0.912	0.177	0.951
PMI2726	cysK	7103442	7102569	529507.PMI2726	529507.PMI1827	0.381	0	0	0	0.062	0	0.912	0.147	0.95
PMI2726	cysM	7103442	7102573	529507.PMI2726	529507.PMI1831	0.381	0.001	0	0	0.062	0	0.912	0.147	0.95
PMI1275	thrA	7102021	7100803	529507.PMI1275	529507.PMI0001	0	0	0	0	0	0	0.922	0.064	0.924
metL	PMI1275	7103924	7102021	529507.PMI3224	529507.PMI1275	0	0	0	0	0	0	0.922	0.064	0.924
cysM	PMI1275	7102573	7102021	529507.PMI1831	529507.PMI1275	0.096	0	0	0	0	0	0.9	0.128	0.914
cysK	PMI1275	7102569	7102021	529507.PMI1827	529507.PMI1275	0.096	0	0	0	0	0	0.9	0.128	0.914
PMI1275	sseA	7102021	7101407	529507.PMI1275	529507.PMI0623	0.048	0	0	0	0	0	0.9	0	0.9
metE	thrA	7104221	7100803	529507.PMI3529	529507.PMI0001	0.061	0	0	0	0.151	0	0.8	0.407	0.892
metE	metL	7104221	7103924	529507.PMI3529	529507.PMI3224	0.061	0	0	0	0.151	0	0.8	0.407	0.892
metE	cysK	7104221	7102569	529507.PMI3529	529507.PMI1827	0	0	0	0	0.063	0	0.862	0.19	0.886
cysM	sseA	7102573	7101407	529507.PMI1831	529507.PMI0623	0.381	0	0	0	0.065	0	0.8	0.11	0.883
cysK	sseA	7102569	7101407	529507.PMI1827	529507.PMI0623	0.381	0	0	0	0.065	0	0.8	0.11	0.883
metE	cysM	7104221	7102573	529507.PMI3529	529507.PMI1831	0	0	0	0	0.063	0	0.862	0.171	0.883
cysM	cysK	7102573	7102569	529507.PMI1831	529507.PMI1827	0	0	0.778	0.824	0	0	0.8	0.396	0.838
metB	sseA	7103923	7101407	529507.PMI3223	529507.PMI0623	0.126	0.03	0	0	0.081	0	0.8	0.11	0.837
cysK	thrA	7102569	7100803	529507.PMI1827	529507.PMI0001	0.099	0	0.162	0	0.129	0	0	0.431	0.575
cysM	thrA	7102573	7100803	529507.PMI1831	529507.PMI0001	0.099	0	0	0	0.129	0	0	0.431	0.514
metL	cysM	7103924	7102573	529507.PMI3224	529507.PMI1831	0.099	0	0	0	0.129	0	0	0.431	0.514
metL	cysK	7103924	7102569	529507.PMI3224	529507.PMI1827	0.099	0	0	0	0.129	0	0	0.431	0.514
metF	metH	7103648	7103474	529507.PMI2932	529507.PMI2758	0.478	0	0	0	0.641	0	0.974	0.587	0.997
metE	metK	7104221	7102829	529507.PMI3529	529507.PMI2095	0.06	0	0	0	0.661	0.213	0.965	0.632	0.996
metE	metB	7104221	7103923	529507.PMI3529	529507.PMI3223	0.302	0	0	0	0.129	0	0.965	0.807	0.995
metH	metK	7103474	7102829	529507.PMI2758	529507.PMI2095	0.407	0	0	0	0.127	0	0.974	0.495	0.992
metE	PMI1248	7104221	7101994	529507.PMI3529	529507.PMI1248	0.302	0	0	0	0.129	0	0.965	0.638	0.991
metH	PMI2726	7103474	7103442	529507.PMI2758	529507.PMI2726	0.46	0	0	0	0	0	0.974	0.451	0.991
metE	mdeA	7104221	7102987	529507.PMI3529	529507.PMI2254	0.302	0	0	0	0.129	0	0.965	0.638	0.991
metB	metH	7103923	7103474	529507.PMI3223	529507.PMI2758	0.303	0	0	0	0.063	0	0.974	0.495	0.99
metH	PMI0028	7103474	7100830	529507.PMI2758	529507.PMI0028	0.303	0	0	0	0.063	0	0.974	0.495	0.99
metH	PMI1248	7103474	7101994	529507.PMI2758	529507.PMI1248	0.303	0	0	0	0.063	0	0.974	0.495	0.99
metE	metF	7104221	7103648	529507.PMI3529	529507.PMI2932	0.381	0	0.311	0	0.819	0.123	0.581	0.72	0.99
metH	mdeA	7103474	7102987	529507.PMI2758	529507.PMI2254	0.303	0	0	0	0.063	0	0.974	0.495	0.99
metH	PMI0626	7103474	7101410	529507.PMI2758	529507.PMI0626	0.303	0	0	0	0.063	0	0.974	0.495	0.99
metE	PMI0626	7104221	7101410	529507.PMI3529	529507.PMI0626	0.302	0	0	0	0.128	0	0.965	0.454	0.987
metE	PMI0028	7104221	7100830	529507.PMI3529	529507.PMI0028	0.302	0	0	0	0.128	0	0.965	0.454	0.987
metH	luxS	7103474	7101166	529507.PMI2758	529507.PMI0379	0.381	0	0	0	0	0	0.974	0.176	0.985
metE	metH	7104221	7103474	529507.PMI3529	529507.PMI2758	0.386	0	0	0	0.1	0	0.894	0.682	0.979
metE	luxS	7104221	7101166	529507.PMI3529	529507.PMI0379	0.302	0	0	0	0	0	0.965	0.186	0.978
metB	PMI0626	7103923	7101410	529507.PMI3223	529507.PMI0626	0	0	0.778	0.721	0.083	0	0.965	0.639	0.978
metB	PMI0028	7103923	7100830	529507.PMI3223	529507.PMI0028	0	0	0.778	0.72	0.083	0	0.965	0.638	0.978
metK	PMI1248	7102829	7101994	529507.PMI2095	529507.PMI1248	0.044	0	0	0	0.114	0.454	0.9	0.567	0.976
mdeA	metK	7102987	7102829	529507.PMI2254	529507.PMI2095	0.044	0	0	0	0.114	0.454	0.9	0.567	0.976
metE	PMI2726	7104221	7103442	529507.PMI3529	529507.PMI2726	0.133	0	0	0	0.149	0	0.965	0.12	0.974
PMI2726	PMI0626	7103442	7101410	529507.PMI2726	529507.PMI0626	0.117	0	0.736	0.683	0.084	0	0.956	0.177	0.971
PMI2726	PMI0028	7103442	7100830	529507.PMI2726	529507.PMI0028	0.117	0	0.704	0.677	0.084	0	0.956	0.177	0.971
metB	PMI2726	7103923	7103442	529507.PMI3223	529507.PMI2726	0.117	0	0.775	0.796	0.064	0	0.956	0.231	0.968
metB	metF	7103923	7103648	529507.PMI3223	529507.PMI2932	0.381	0	0	0	0.48	0.215	0.539	0.665	0.953
metB	luxS	7103923	7101166	529507.PMI3223	529507.PMI0379	0.381	0	0	0	0	0	0.9	0.224	0.947
luxS	PMI0028	7101166	7100830	529507.PMI0379	529507.PMI0028	0.381	0	0	0	0	0	0.9	0.127	0.941
PMI0626	luxS	7101410	7101166	529507.PMI0626	529507.PMI0379	0.381	0	0	0	0	0	0.9	0.127	0.941
metF	PMI1248	7103648	7101994	529507.PMI2932	529507.PMI1248	0.381	0	0	0	0.48	0.215	0.539	0.47	0.927
metF	mdeA	7103648	7102987	529507.PMI2932	529507.PMI2254	0.381	0	0	0	0.48	0.215	0.539	0.47	0.927
metF	PMI0626	7103648	7101410	529507.PMI2932	529507.PMI0626	0.381	0	0	0	0.282	0.215	0.539	0.478	0.9
metF	PMI0028	7103648	7100830	529507.PMI2932	529507.PMI0028	0.381	0	0	0	0.282	0.215	0.539	0.478	0.9
PMI2726	luxS	7103442	7101166	529507.PMI2726	529507.PMI0379	0.043	0	0	0	0	0	0.9	0	0.9
metF	metK	7103648	7102829	529507.PMI2932	529507.PMI2095	0.381	0	0	0	0.341	0	0.539	0.462	0.885
mdeA	PMI1248	7102987	7101994	529507.PMI2254	529507.PMI1248	0	0	0.778	0.829	0	0	0.8	0	0.826
PMI0626	PMI0028	7101410	7100830	529507.PMI0626	529507.PMI0028	0	0	0.778	0.879	0	0	0.8	0	0.818
PMI1248	PMI0626	7101994	7101410	529507.PMI1248	529507.PMI0626	0	0	0.777	0.651	0.083	0	0.673	0.453	0.805
PMI1248	PMI0028	7101994	7100830	529507.PMI1248	529507.PMI0028	0	0	0.776	0.696	0.083	0	0.673	0.453	0.791
mdeA	PMI0028	7102987	7100830	529507.PMI2254	529507.PMI0028	0	0	0.778	0.744	0.083	0	0.673	0.453	0.776
metB	metK	7103923	7102829	529507.PMI3223	529507.PMI2095	0.044	0	0	0	0.114	0.454	0	0.567	0.772
mdeA	PMI0626	7102987	7101410	529507.PMI2254	529507.PMI0626	0	0	0.778	0.759	0.083	0	0.673	0.453	0.771
metF	PMI2726	7103648	7103442	529507.PMI2932	529507.PMI2726	0.381	0	0	0	0.059	0	0.537	0.111	0.728
PMI2726	PMI1248	7103442	7101994	529507.PMI2726	529507.PMI1248	0.117	0	0.77	0.766	0.064	0	0.581	0.231	0.704
PMI2726	mdeA	7103442	7102987	529507.PMI2726	529507.PMI2254	0.117	0	0.778	0.891	0.064	0	0.581	0.231	0.662
metK	PMI0626	7102829	7101410	529507.PMI2095	529507.PMI0626	0.044	0	0	0	0.114	0.454	0	0.281	0.622
metK	PMI0028	7102829	7100830	529507.PMI2095	529507.PMI0028	0.044	0	0	0	0.114	0.454	0	0.281	0.622
metK	luxS	7102829	7101166	529507.PMI2095	529507.PMI0379	0.087	0	0	0	0	0	0	0.497	0.521
mdeA	luxS	7102987	7101166	529507.PMI2254	529507.PMI0379	0.381	0	0	0	0	0	0	0.164	0.46
PMI1248	luxS	7101994	7101166	529507.PMI1248	529507.PMI0379	0.381	0	0	0	0	0	0	0.127	0.436
metL	thrA	7103924	7100803	529507.PMI3224	529507.PMI0001	0.478	0	0.777	0.691	0.927	0.897	0.947	0.494	0.999
metE	metB	7104221	7103923	529507.PMI3529	529507.PMI3223	0.302	0	0	0	0.129	0	0.965	0.807	0.995
metL	metB	7103924	7103923	529507.PMI3224	529507.PMI3223	0.908	0	0	0	0.475	0.119	0.8	0.475	0.994
metH	PMI2726	7103474	7103442	529507.PMI2758	529507.PMI2726	0.46	0	0	0	0	0	0.974	0.451	0.991
metB	cysK	7103923	7102569	529507.PMI3223	529507.PMI1827	0.381	0.001	0.182	0	0.118	0.215	0.965	0.39	0.991
metH	PMI0028	7103474	7100830	529507.PMI2758	529507.PMI0028	0.303	0	0	0	0.063	0	0.974	0.495	0.99
metB	metH	7103923	7103474	529507.PMI3223	529507.PMI2758	0.303	0	0	0	0.063	0	0.974	0.495	0.99
metB	cysM	7103923	7102573	529507.PMI3223	529507.PMI1831	0.381	0.003	0.158	0	0.118	0.215	0.965	0.365	0.99
metE	PMI0028	7104221	7100830	529507.PMI3529	529507.PMI0028	0.302	0	0	0	0.128	0	0.965	0.454	0.987
cysK	PMI0028	7102569	7100830	529507.PMI1827	529507.PMI0028	0.381	0	0.18	0	0.118	0.215	0.956	0.211	0.985
cysM	PMI0028	7102573	7100830	529507.PMI1831	529507.PMI0028	0.381	0.001	0	0	0.118	0.215	0.956	0.299	0.984
metB	PMI1275	7103923	7102021	529507.PMI3223	529507.PMI1275	0.381	0	0	0	0	0	0.965	0.177	0.981
metE	metH	7104221	7103474	529507.PMI3529	529507.PMI2758	0.386	0	0	0	0.1	0	0.894	0.682	0.979
metB	PMI0028	7103923	7100830	529507.PMI3223	529507.PMI0028	0	0	0.778	0.72	0.083	0	0.965	0.638	0.978
metL	metH	7103924	7103474	529507.PMI3224	529507.PMI2758	0.479	0	0	0	0.063	0	0.8	0.786	0.976
metH	thrA	7103474	7100803	529507.PMI2758	529507.PMI0001	0.479	0	0	0	0.063	0	0.8	0.786	0.976
metH	PMI1275	7103474	7102021	529507.PMI2758	529507.PMI1275	0	0	0	0	0	0	0.974	0.098	0.975
metE	PMI2726	7104221	7103442	529507.PMI3529	529507.PMI2726	0.133	0	0	0	0.149	0	0.965	0.12	0.974
PMI2726	PMI0028	7103442	7100830	529507.PMI2726	529507.PMI0028	0.117	0	0.704	0.677	0.084	0	0.956	0.177	0.971
metB	PMI2726	7103923	7103442	529507.PMI3223	529507.PMI2726	0.117	0	0.775	0.796	0.064	0	0.956	0.231	0.968
metB	thrA	7103923	7100803	529507.PMI3223	529507.PMI0001	0.433	0	0	0	0.475	0.119	0.8	0.475	0.967
metE	PMI1275	7104221	7102021	529507.PMI3529	529507.PMI1275	0.061	0	0	0	0	0	0.965	0.071	0.967
metL	PMI0028	7103924	7100830	529507.PMI3224	529507.PMI0028	0.433	0	0	0	0.475	0.119	0.8	0.475	0.967
PMI0028	thrA	7100830	7100803	529507.PMI0028	529507.PMI0001	0.433	0	0	0	0.475	0.119	0.8	0.475	0.967
PMI2726	PMI1275	7103442	7102021	529507.PMI2726	529507.PMI1275	0.064	0	0.151	0	0	0	0.956	0.061	0.963
sseA	PMI0028	7101407	7100830	529507.PMI0623	529507.PMI0028	0.369	0.341	0	0	0.081	0	0.9	0.11	0.959
PMI2726	thrA	7103442	7100803	529507.PMI2726	529507.PMI0001	0.438	0	0	0	0.061	0	0.914	0.129	0.955
metL	PMI2726	7103924	7103442	529507.PMI3224	529507.PMI2726	0.438	0	0	0	0.061	0	0.914	0.129	0.955
metH	cysM	7103474	7102573	529507.PMI2758	529507.PMI1831	0.059	0	0	0	0.065	0	0.911	0.486	0.954
metH	cysK	7103474	7102569	529507.PMI2758	529507.PMI1827	0.059	0	0	0	0.065	0	0.911	0.486	0.954
PMI1275	PMI0028	7102021	7100830	529507.PMI1275	529507.PMI0028	0.381	0	0	0	0	0	0.912	0.177	0.951
PMI2726	cysM	7103442	7102573	529507.PMI2726	529507.PMI1831	0.381	0.001	0	0	0.062	0	0.912	0.147	0.95
PMI2726	cysK	7103442	7102569	529507.PMI2726	529507.PMI1827	0.381	0	0	0	0.062	0	0.912	0.147	0.95
PMI1275	thrA	7102021	7100803	529507.PMI1275	529507.PMI0001	0	0	0	0	0	0	0.922	0.064	0.924
metL	PMI1275	7103924	7102021	529507.PMI3224	529507.PMI1275	0	0	0	0	0	0	0.922	0.064	0.924
cysK	PMI1275	7102569	7102021	529507.PMI1827	529507.PMI1275	0.096	0	0	0	0	0	0.9	0.128	0.914
cysM	PMI1275	7102573	7102021	529507.PMI1831	529507.PMI1275	0.096	0	0	0	0	0	0.9	0.128	0.914
PMI1275	sseA	7102021	7101407	529507.PMI1275	529507.PMI0623	0.048	0	0	0	0	0	0.9	0	0.9
metE	metL	7104221	7103924	529507.PMI3529	529507.PMI3224	0.061	0	0	0	0.151	0	0.8	0.407	0.892
metE	thrA	7104221	7100803	529507.PMI3529	529507.PMI0001	0.061	0	0	0	0.151	0	0.8	0.407	0.892
metE	cysK	7104221	7102569	529507.PMI3529	529507.PMI1827	0	0	0	0	0.063	0	0.862	0.19	0.886
cysK	sseA	7102569	7101407	529507.PMI1827	529507.PMI0623	0.381	0	0	0	0.065	0	0.8	0.11	0.883
metE	cysM	7104221	7102573	529507.PMI3529	529507.PMI1831	0	0	0	0	0.063	0	0.862	0.171	0.883
cysM	sseA	7102573	7101407	529507.PMI1831	529507.PMI0623	0.381	0	0	0	0.065	0	0.8	0.11	0.883
cysM	cysK	7102573	7102569	529507.PMI1831	529507.PMI1827	0	0	0.778	0.824	0	0	0.8	0.396	0.838
metB	sseA	7103923	7101407	529507.PMI3223	529507.PMI0623	0.126	0.03	0	0	0.081	0	0.8	0.11	0.837
cysK	thrA	7102569	7100803	529507.PMI1827	529507.PMI0001	0.099	0	0.162	0	0.129	0	0	0.431	0.575
metL	cysM	7103924	7102573	529507.PMI3224	529507.PMI1831	0.099	0	0	0	0.129	0	0	0.431	0.514
cysM	thrA	7102573	7100803	529507.PMI1831	529507.PMI0001	0.099	0	0	0	0.129	0	0	0.431	0.514
metL	cysK	7103924	7102569	529507.PMI3224	529507.PMI1827	0.099	0	0	0	0.129	0	0	0.431	0.514
metE	metB	7104221	7103923	529507.PMI3529	529507.PMI3223	0.302	0	0	0	0.129	0	0.965	0.807	0.995
metH	PMI2726	7103474	7103442	529507.PMI2758	529507.PMI2726	0.46	0	0	0	0	0	0.974	0.451	0.991
metB	metH	7103923	7103474	529507.PMI3223	529507.PMI2758	0.303	0	0	0	0.063	0	0.974	0.495	0.99
cysE	PMI0235	7103886	7101031	529507.PMI3185	529507.PMI0235	0.381	0	0.438	0	0.069	0.462	0.929	0.381	0.99
metB	PMI0235	7103923	7101031	529507.PMI3223	529507.PMI0235	0.381	0.008	0.31	0	0.118	0.215	0.963	0.278	0.99
metH	luxS	7103474	7101166	529507.PMI2758	529507.PMI0379	0.381	0	0	0	0	0	0.974	0.176	0.985
metE	metH	7104221	7103474	529507.PMI3529	529507.PMI2758	0.386	0	0	0	0.1	0	0.894	0.682	0.979
metE	luxS	7104221	7101166	529507.PMI3529	529507.PMI0379	0.302	0	0	0	0	0	0.965	0.186	0.978
metH	PMI0235	7103474	7101031	529507.PMI2758	529507.PMI0235	0.059	0	0	0	0.065	0	0.955	0.486	0.977
PMI2726	PMI0235	7103442	7101031	529507.PMI2726	529507.PMI0235	0.381	0.003	0	0	0.062	0	0.956	0.147	0.975
metE	PMI2726	7104221	7103442	529507.PMI3529	529507.PMI2726	0.133	0	0	0	0.149	0	0.965	0.12	0.974
PMI0239	PMI0235	7101035	7101031	529507.PMI0239	529507.PMI0235	0.844	0	0.703	0	0	0	0.392	0.072	0.97
PMI0234	PMI0232	7101030	7101028	529507.PMI0234	529507.PMI0232	0.869	0	0.771	0	0.063	0	0	0.063	0.97
metB	PMI2726	7103923	7103442	529507.PMI3223	529507.PMI2726	0.117	0	0.775	0.796	0.064	0	0.956	0.231	0.968
PMI0235	PMI0234	7101031	7101030	529507.PMI0235	529507.PMI0234	0.888	0	0.703	0	0.06	0	0	0.071	0.967
PMI0236	PMI0235	7101032	7101031	529507.PMI0236	529507.PMI0235	0.863	0	0.767	0	0	0	0	0	0.966
PMI0236	PMI0234	7101032	7101030	529507.PMI0236	529507.PMI0234	0.849	0	0.771	0	0	0	0	0	0.964
PMI0239	PMI0236	7101035	7101032	529507.PMI0239	529507.PMI0236	0.843	0	0.778	0	0	0	0	0	0.963
metE	PMI0235	7104221	7101031	529507.PMI3529	529507.PMI0235	0	0	0	0	0.063	0	0.952	0.142	0.958
PMI0236	PMI0232	7101032	7101028	529507.PMI0236	529507.PMI0232	0.802	0	0.776	0	0	0	0	0	0.954
PMI0239	PMI0234	7101035	7101030	529507.PMI0239	529507.PMI0234	0.827	0	0.727	0	0.089	0	0	0	0.953
PMI0239	PMI0232	7101035	7101028	529507.PMI0239	529507.PMI0232	0.786	0	0.774	0	0.061	0	0	0	0.95
metB	luxS	7103923	7101166	529507.PMI3223	529507.PMI0379	0.381	0	0	0	0	0	0.9	0.224	0.947
luxS	PMI0235	7101166	7101031	529507.PMI0379	529507.PMI0235	0.322	0	0	0	0	0	0.9	0.21	0.941
PMI0235	PMI0232	7101031	7101028	529507.PMI0235	529507.PMI0232	0.798	0	0.705	0	0	0	0	0	0.938
PMI2726	luxS	7103442	7101166	529507.PMI2726	529507.PMI0379	0.043	0	0	0	0	0	0.9	0	0.9
metB	cysE	7103923	7103886	529507.PMI3223	529507.PMI3185	0.381	0	0	0	0	0	0.339	0.46	0.76
cysE	PMI2726	7103886	7103442	529507.PMI3185	529507.PMI2726	0.095	0	0	0	0	0	0.673	0.129	0.719
metE	cysE	7104221	7103886	529507.PMI3529	529507.PMI3185	0	0	0	0	0	0	0	0.406	0.406
metL	thrA	7103924	7100803	529507.PMI3224	529507.PMI0001	0.478	0	0.777	0.691	0.927	0.897	0.947	0.494	0.999
metE	metB	7104221	7103923	529507.PMI3529	529507.PMI3223	0.302	0	0	0	0.129	0	0.965	0.807	0.995
metL	metB	7103924	7103923	529507.PMI3224	529507.PMI3223	0.908	0	0	0	0.475	0.119	0.8	0.475	0.994
metH	PMI2726	7103474	7103442	529507.PMI2758	529507.PMI2726	0.46	0	0	0	0	0	0.974	0.451	0.991
metH	PMI0028	7103474	7100830	529507.PMI2758	529507.PMI0028	0.303	0	0	0	0.063	0	0.974	0.495	0.99
metB	metH	7103923	7103474	529507.PMI3223	529507.PMI2758	0.303	0	0	0	0.063	0	0.974	0.495	0.99
metH	PMI0626	7103474	7101410	529507.PMI2758	529507.PMI0626	0.303	0	0	0	0.063	0	0.974	0.495	0.99
metB	cysM	7103923	7102573	529507.PMI3223	529507.PMI1831	0.381	0.003	0.158	0	0.118	0.215	0.965	0.365	0.99
metE	PMI0626	7104221	7101410	529507.PMI3529	529507.PMI0626	0.302	0	0	0	0.128	0	0.965	0.454	0.987
metE	PMI0028	7104221	7100830	529507.PMI3529	529507.PMI0028	0.302	0	0	0	0.128	0	0.965	0.454	0.987
cysM	PMI0028	7102573	7100830	529507.PMI1831	529507.PMI0028	0.381	0.001	0	0	0.118	0.215	0.956	0.299	0.984
cysM	PMI0626	7102573	7101410	529507.PMI1831	529507.PMI0626	0.381	0.002	0	0	0.118	0.215	0.956	0.299	0.984
metB	PMI1275	7103923	7102021	529507.PMI3223	529507.PMI1275	0.381	0	0	0	0	0	0.965	0.177	0.981
metE	metH	7104221	7103474	529507.PMI3529	529507.PMI2758	0.386	0	0	0	0.1	0	0.894	0.682	0.979
metB	PMI0028	7103923	7100830	529507.PMI3223	529507.PMI0028	0	0	0.778	0.72	0.083	0	0.965	0.638	0.978
metB	PMI0626	7103923	7101410	529507.PMI3223	529507.PMI0626	0	0	0.778	0.721	0.083	0	0.965	0.639	0.978
metL	metH	7103924	7103474	529507.PMI3224	529507.PMI2758	0.479	0	0	0	0.063	0	0.8	0.786	0.976
metH	thrA	7103474	7100803	529507.PMI2758	529507.PMI0001	0.479	0	0	0	0.063	0	0.8	0.786	0.976
metH	PMI1275	7103474	7102021	529507.PMI2758	529507.PMI1275	0	0	0	0	0	0	0.974	0.098	0.975
metE	PMI2726	7104221	7103442	529507.PMI3529	529507.PMI2726	0.133	0	0	0	0.149	0	0.965	0.12	0.974
PMI2726	PMI0626	7103442	7101410	529507.PMI2726	529507.PMI0626	0.117	0	0.736	0.683	0.084	0	0.956	0.177	0.971
PMI2726	PMI0028	7103442	7100830	529507.PMI2726	529507.PMI0028	0.117	0	0.704	0.677	0.084	0	0.956	0.177	0.971
metB	PMI2726	7103923	7103442	529507.PMI3223	529507.PMI2726	0.117	0	0.775	0.796	0.064	0	0.956	0.231	0.968
PMI0028	thrA	7100830	7100803	529507.PMI0028	529507.PMI0001	0.433	0	0	0	0.475	0.119	0.8	0.475	0.967
metL	PMI0028	7103924	7100830	529507.PMI3224	529507.PMI0028	0.433	0	0	0	0.475	0.119	0.8	0.475	0.967
PMI0626	thrA	7101410	7100803	529507.PMI0626	529507.PMI0001	0.433	0	0	0	0.475	0.119	0.8	0.475	0.967
metE	PMI1275	7104221	7102021	529507.PMI3529	529507.PMI1275	0.061	0	0	0	0	0	0.965	0.071	0.967
metL	PMI0626	7103924	7101410	529507.PMI3224	529507.PMI0626	0.433	0	0	0	0.475	0.119	0.8	0.475	0.967
metB	thrA	7103923	7100803	529507.PMI3223	529507.PMI0001	0.433	0	0	0	0.475	0.119	0.8	0.475	0.967
PMI2726	PMI1275	7103442	7102021	529507.PMI2726	529507.PMI1275	0.064	0	0.151	0	0	0	0.956	0.061	0.963
PMI1275	PMI1274	7102021	7102020	529507.PMI1275	529507.PMI1274	0.89	0	0.362	0	0	0	0	0.416	0.955
PMI2726	thrA	7103442	7100803	529507.PMI2726	529507.PMI0001	0.438	0	0	0	0.061	0	0.914	0.129	0.955
metL	PMI2726	7103924	7103442	529507.PMI3224	529507.PMI2726	0.438	0	0	0	0.061	0	0.914	0.129	0.955
metH	cysM	7103474	7102573	529507.PMI2758	529507.PMI1831	0.059	0	0	0	0.065	0	0.911	0.486	0.954
PMI1275	PMI0626	7102021	7101410	529507.PMI1275	529507.PMI0626	0.381	0	0	0	0	0	0.912	0.177	0.951
PMI1275	PMI0028	7102021	7100830	529507.PMI1275	529507.PMI0028	0.381	0	0	0	0	0	0.912	0.177	0.951
PMI2726	cysM	7103442	7102573	529507.PMI2726	529507.PMI1831	0.381	0.001	0	0	0.062	0	0.912	0.147	0.95
PMI1275	thrA	7102021	7100803	529507.PMI1275	529507.PMI0001	0	0	0	0	0	0	0.922	0.064	0.924
metL	PMI1275	7103924	7102021	529507.PMI3224	529507.PMI1275	0	0	0	0	0	0	0.922	0.064	0.924
cysM	PMI1275	7102573	7102021	529507.PMI1831	529507.PMI1275	0.096	0	0	0	0	0	0.9	0.128	0.914
metE	metL	7104221	7103924	529507.PMI3529	529507.PMI3224	0.061	0	0	0	0.151	0	0.8	0.407	0.892
metE	thrA	7104221	7100803	529507.PMI3529	529507.PMI0001	0.061	0	0	0	0.151	0	0.8	0.407	0.892
metE	cysM	7104221	7102573	529507.PMI3529	529507.PMI1831	0	0	0	0	0.063	0	0.862	0.171	0.883
PMI0626	PMI0028	7101410	7100830	529507.PMI0626	529507.PMI0028	0	0	0.778	0.879	0	0	0.8	0	0.818
metL	cysM	7103924	7102573	529507.PMI3224	529507.PMI1831	0.099	0	0	0	0.129	0	0	0.431	0.514
cysM	thrA	7102573	7100803	529507.PMI1831	529507.PMI0001	0.099	0	0	0	0.129	0	0	0.431	0.514
PMI0606	bioB	7101390	7101387	529507.PMI0606	529507.PMI0603	0.902	0	0.774	0	0.649	0	0.965	0.738	0.999
accB	accC	7104318	7104317	529507.PMI3628	529507.PMI3627	0.872	0	0.754	0	0.81	0.461	0.914	0.715	0.999
accB	fabD	7104318	7101632	529507.PMI3628	529507.PMI0860	0.381	0	0.219	0	0.591	0.174	0.965	0.563	0.996
accC	fabD	7104317	7101632	529507.PMI3627	529507.PMI0860	0.381	0	0.243	0	0.536	0.174	0.965	0.231	0.994
accB	birA	7104318	7103949	529507.PMI3628	529507.PMI3249	0.431	0	0.223	0	0.566	0.621	0.539	0.45	0.977
PMI3559	fabD	7104250	7101632	529507.PMI3559	529507.PMI0860	0.303	0	0.211	0	0.06	0	0.956	0.075	0.975
birA	bioB	7103949	7101387	529507.PMI3249	529507.PMI0603	0.424	0	0	0	0.062	0	0.9	0.267	0.955
accC	birA	7104317	7103949	529507.PMI3627	529507.PMI3249	0.431	0	0.519	0	0.285	0.18	0.539	0.442	0.949
birA	murB	7103949	7103948	529507.PMI3249	529507.PMI3248	0.916	0	0	0	0.063	0	0	0.235	0.935
accB	PMI3559	7104318	7104250	529507.PMI3628	529507.PMI3559	0.301	0	0.499	0	0.061	0	0.8	0.107	0.93
birA	nadE	7103949	7102613	529507.PMI3249	529507.PMI1871	0.07	0	0	0	0.069	0	0	0.886	0.892
birA	fabD	7103949	7101632	529507.PMI3249	529507.PMI0860	0.381	0	0.662	0	0.062	0.12	0	0.347	0.866
accC	PMI3559	7104317	7104250	529507.PMI3627	529507.PMI3559	0.075	0	0.778	0.897	0.061	0	0.812	0.122	0.838
PMI3559	birA	7104250	7103949	529507.PMI3559	529507.PMI3249	0.43	0	0.342	0	0.062	0	0.539	0.109	0.829
birA	PMI0606	7103949	7101390	529507.PMI3249	529507.PMI0606	0.416	0	0	0	0.063	0	0.547	0.388	0.827
birA	gcvP	7103949	7102757	529507.PMI3249	529507.PMI2019	0	0	0	0	0	0	0	0.815	0.815
birA	mnmC	7103949	7102540	529507.PMI3249	529507.PMI1796	0.054	0	0	0	0.061	0	0	0.786	0.793
gcvP	mnmC	7102757	7102540	529507.PMI2019	529507.PMI1796	0	0	0	0	0.06	0	0.752	0.122	0.777
accC	bioB	7104317	7101387	529507.PMI3627	529507.PMI0603	0	0	0	0	0.092	0	0	0.391	0.423
moeB	moaE	7101420	7101397	529507.PMI0636	529507.PMI0613	0.381	0.526	0.528	0	0.084	0.186	0.931	0.562	0.996
iscS	thiI	7102602	7100896	529507.PMI1860	529507.PMI0097	0.417	0	0	0	0.063	0.186	0.951	0.713	0.992
thiF	moaE	7103495	7101397	529507.PMI2779	529507.PMI0613	0.381	0.656	0.454	0	0.084	0.186	0.673	0.562	0.984
thiF	thiI	7103495	7100896	529507.PMI2779	529507.PMI0097	0.34	0	0	0	0.063	0	0.951	0.477	0.982
thiG	thiF	7103497	7103495	529507.PMI2781	529507.PMI2779	0.902	0.188	0.514	0	0.416	0	0	0.246	0.98
iscS	moeB	7102602	7101420	529507.PMI1860	529507.PMI0636	0.115	0	0.218	0	0.061	0.183	0.931	0.231	0.965
thiG	thiI	7103497	7100896	529507.PMI2781	529507.PMI0097	0.107	0	0	0	0.062	0	0.9	0.562	0.958
guaA	metG	7102291	7101430	529507.PMI1545	529507.PMI0646	0.044	0	0	0	0.808	0	0	0.786	0.957
thiG	moeB	7103497	7101420	529507.PMI2781	529507.PMI0636	0.337	0.088	0.489	0	0.416	0	0	0.525	0.898
metG	pheA	7101430	7101177	529507.PMI0646	529507.PMI0390	0.107	0	0	0	0.39	0	0	0.786	0.873
pheA	thiI	7101177	7100896	529507.PMI0390	529507.PMI0097	0.105	0	0	0	0	0	0	0.843	0.853
thiF	iscS	7103495	7102602	529507.PMI2779	529507.PMI1860	0.115	0	0.227	0	0.061	0.183	0.673	0.231	0.837
metG	thiI	7101430	7100896	529507.PMI0646	529507.PMI0097	0.272	0	0	0	0.102	0	0	0.768	0.835
moeB	thiI	7101420	7100896	529507.PMI0636	529507.PMI0097	0.34	0	0	0	0.063	0	0.538	0.477	0.83
guaA	topA	7102291	7102080	529507.PMI1545	529507.PMI1334	0.068	0	0	0	0.161	0	0	0.796	0.827
topA	metG	7102080	7101430	529507.PMI1334	529507.PMI0646	0.045	0	0	0	0.1	0.127	0	0.786	0.817
guaA	thiI	7102291	7100896	529507.PMI1545	529507.PMI0097	0.08	0	0	0	0.119	0	0	0.786	0.811
guaA	pheA	7102291	7101177	529507.PMI1545	529507.PMI0390	0.052	0	0	0	0.088	0	0	0.795	0.808
moaE	thiI	7101397	7100896	529507.PMI0613	529507.PMI0097	0.059	0	0	0	0.067	0.215	0.539	0.484	0.806
topA	thiI	7102080	7100896	529507.PMI1334	529507.PMI0097	0.082	0	0	0	0.063	0	0	0.786	0.799
PMI0653	thiI	7101436	7100896	529507.PMI0653	529507.PMI0097	0.053	0	0	0	0.061	0	0	0.769	0.776
iscS	metG	7102602	7101430	529507.PMI1860	529507.PMI0646	0	0	0	0	0.103	0	0	0.569	0.596
iscS	guaA	7102602	7102291	529507.PMI1860	529507.PMI1545	0.043	0	0	0	0.595	0	0	0.043	0.596
PMI2909	gcvH	7103625	7102758	529507.PMI2909	529507.PMI2020	0.347	0	0.777	0	0.985	0.664	0.539	0.109	0.999
gcvT	gcvP	7102759	7102757	529507.PMI2021	529507.PMI2019	0.728	0.061	0.77	0	0.999	0	0.974	0.646	0.999
gcvT	gcvH	7102759	7102758	529507.PMI2021	529507.PMI2020	0.826	0	0.778	0	0.985	0.664	0.912	0.508	0.999
PMI2909	gcvP	7103625	7102757	529507.PMI2909	529507.PMI2019	0.469	0	0.71	0	0.999	0	0.974	0.494	0.999
gcvH	gcvP	7102758	7102757	529507.PMI2020	529507.PMI2019	0.762	0	0.738	0	0.997	0.215	0.948	0.686	0.999
gcvT	glyA	7102759	7102609	529507.PMI2021	529507.PMI1867	0.381	0.727	0	0	0.578	0.169	0.965	0.472	0.998
gcvP	glyA	7102757	7102609	529507.PMI2019	529507.PMI1867	0.478	0	0	0	0.811	0	0.974	0.523	0.998
folD	glyA	7102889	7102609	529507.PMI2155	529507.PMI1867	0.381	0	0.345	0	0.53	0.246	0.965	0.618	0.997
lpdA	gcvP	7102780	7102757	529507.PMI2044	529507.PMI2019	0.478	0	0	0	0.124	0	0.974	0.495	0.993
gcvH	glyA	7102758	7102609	529507.PMI2020	529507.PMI1867	0.381	0	0	0	0.34	0	0.956	0.569	0.991
folD	gcvT	7102889	7102759	529507.PMI2155	529507.PMI2021	0.381	0	0	0	0.41	0	0.965	0.308	0.99
gltB	gcvP	7104367	7102757	529507.PMI3677	529507.PMI2019	0	0	0	0	0.693	0	0.8	0.786	0.985
lpdA	gcvT	7102780	7102759	529507.PMI2044	529507.PMI2021	0.381	0	0.249	0	0.13	0	0.965	0.122	0.985
gcvP	PMI1269	7102757	7102015	529507.PMI2019	529507.PMI1269	0.291	0	0	0	0	0	0.974	0.228	0.984
lpdA	glyA	7102780	7102609	529507.PMI2044	529507.PMI1867	0.09	0	0.217	0	0.067	0.119	0.965	0.38	0.984
gltB	putA	7104367	7102362	529507.PMI3677	529507.PMI1616	0.058	0	0	0	0.198	0	0.9	0.797	0.982
gltB	gcvT	7104367	7102759	529507.PMI3677	529507.PMI2021	0.104	0	0	0	0.519	0	0.8	0.808	0.981
PMI2909	lpdA	7103625	7102780	529507.PMI2909	529507.PMI2044	0.381	0	0.221	0	0.13	0	0.952	0.109	0.979
gcvP	putA	7102757	7102362	529507.PMI2019	529507.PMI1616	0	0	0	0	0.063	0.128	0.858	0.794	0.973
lpdA	gcvH	7102780	7102758	529507.PMI2044	529507.PMI2020	0.381	0	0.4	0	0.062	0	0.912	0.183	0.97
gcvP	adhE	7102757	7102232	529507.PMI2019	529507.PMI1486	0.058	0	0	0	0.431	0.18	0.58	0.815	0.959
folD	gcvP	7102889	7102757	529507.PMI2155	529507.PMI2019	0.408	0	0	0	0.482	0	0.752	0.456	0.953
gltB	lpdA	7104367	7102780	529507.PMI3677	529507.PMI2044	0.058	0	0	0	0.07	0	0.8	0.743	0.948
glyA	PMI1269	7102609	7102015	529507.PMI1867	529507.PMI1269	0	0	0	0	0.063	0.322	0.9	0.233	0.944
putA	adhE	7102362	7102232	529507.PMI1616	529507.PMI1486	0.387	0	0	0	0.134	0.163	0.581	0.74	0.942
gltB	gcvH	7104367	7102758	529507.PMI3677	529507.PMI2020	0	0	0.155	0	0.19	0	0.8	0.492	0.921
gltB	PMI2909	7104367	7103625	529507.PMI3677	529507.PMI2909	0.104	0	0	0	0.519	0	0	0.786	0.899
PMI2909	glyA	7103625	7102609	529507.PMI2909	529507.PMI1867	0.381	0	0	0	0.578	0.169	0.539	0.109	0.894
gltB	glyA	7104367	7102609	529507.PMI3677	529507.PMI1867	0	0	0	0	0.478	0.54	0	0.41	0.845
lpdA	putA	7102780	7102362	529507.PMI2044	529507.PMI1616	0.053	0	0	0	0.063	0	0.8	0.178	0.834
PMI2909	folD	7103625	7102889	529507.PMI2909	529507.PMI2155	0.381	0	0	0	0.41	0	0.539	0.109	0.829
gcvT	putA	7102759	7102362	529507.PMI2021	529507.PMI1616	0	0	0	0	0.084	0	0.8	0.114	0.823
gcvH	putA	7102758	7102362	529507.PMI2020	529507.PMI1616	0.042	0	0	0	0.062	0	0.8	0.119	0.82
gltB	adhE	7104367	7102232	529507.PMI3677	529507.PMI1486	0.063	0	0	0	0.065	0	0	0.786	0.796
adhE	PMI1269	7102232	7102015	529507.PMI1486	529507.PMI1269	0.046	0	0	0	0.068	0	0.752	0.074	0.768
folD	gcvH	7102889	7102758	529507.PMI2155	529507.PMI2020	0.282	0	0	0	0.067	0	0.584	0.167	0.736
folD	lpdA	7102889	7102780	529507.PMI2155	529507.PMI2044	0.123	0	0	0	0.047	0	0.673	0.131	0.73
gcvT	PMI1269	7102759	7102015	529507.PMI2021	529507.PMI1269	0.059	0	0	0	0	0.372	0.581	0	0.73
PMI2909	PMI1269	7103625	7102015	529507.PMI2909	529507.PMI1269	0.059	0	0	0	0	0.372	0.539	0	0.703
PMI2909	gcvT	7103625	7102759	529507.PMI2909	529507.PMI2021	0	0	0.778	0.619	0	0	0.495	0	0.642
folD	PMI1269	7102889	7102015	529507.PMI2155	529507.PMI1269	0.061	0	0	0	0.063	0	0.611	0	0.627
putA	PMI1269	7102362	7102015	529507.PMI1616	529507.PMI1269	0.064	0	0	0	0	0	0.581	0.117	0.623
lpdA	PMI1269	7102780	7102015	529507.PMI2044	529507.PMI1269	0.044	0	0	0	0	0	0.581	0	0.582
folD	adhE	7102889	7102232	529507.PMI2155	529507.PMI1486	0.067	0	0	0	0.063	0.128	0	0.352	0.44
gcvH	PMI1269	7102758	7102015	529507.PMI2020	529507.PMI1269	0.062	0	0	0	0	0	0.392	0	0.405
lpdA	adhE	7102780	7102232	529507.PMI2044	529507.PMI1486	0	0	0	0	0.072	0	0	0.381	0.401
pheT	pheS	7101804	7101803	529507.PMI1039	529507.PMI1038	0.896	0	0.773	0	0.991	0.945	0.948	0.742	0.999
pheT	metG	7101804	7101430	529507.PMI1039	529507.PMI0646	0.479	0	0	0	0.66	0.926	0.118	0.786	0.997
metG	ileS	7101430	7100817	529507.PMI0646	529507.PMI0015	0.096	0	0	0	0.614	0.945	0.573	0.712	0.997
argS	metG	7101861	7101430	529507.PMI1103	529507.PMI0646	0.288	0	0	0	0.541	0.945	0.573	0.654	0.996
pheS	metG	7101803	7101430	529507.PMI1038	529507.PMI0646	0.417	0	0	0	0.83	0.833	0.539	0.564	0.996
gltX	metG	7102561	7101430	529507.PMI1818	529507.PMI0646	0.107	0	0	0	0.576	0.945	0.551	0.582	0.995
metG	glnS	7101430	7101324	529507.PMI0646	529507.PMI0539	0.107	0	0	0	0.576	0.945	0.551	0.495	0.994
asnS	metG	7101546	7101430	529507.PMI0766	529507.PMI0646	0.098	0	0	0	0.611	0.932	0.551	0.489	0.993
pheT	ileS	7101804	7100817	529507.PMI1039	529507.PMI0015	0.303	0	0	0	0.661	0.943	0.118	0.495	0.992
proS	metG	7102997	7101430	529507.PMI2264	529507.PMI0646	0.063	0	0	0	0.676	0.872	0.573	0.635	0.992
lysS	metG	7102746	7101430	529507.PMI2008	529507.PMI0646	0.066	0	0.21	0	0.605	0.834	0.581	0.495	0.987
proS	leuS	7102997	7101220	529507.PMI2264	529507.PMI0433	0.052	0	0.283	0	0.576	0.846	0.118	0.67	0.984
argS	pheT	7101861	7101804	529507.PMI1103	529507.PMI1039	0.433	0	0	0	0.661	0.74	0.118	0.665	0.982
gltX	ileS	7102561	7100817	529507.PMI1818	529507.PMI0015	0.048	0	0.494	0	0.527	0.735	0.107	0.567	0.971
argS	ileS	7101861	7100817	529507.PMI1103	529507.PMI0015	0.053	0	0	0	0.479	0.796	0.118	0.725	0.971
metG	leuS	7101430	7101220	529507.PMI0646	529507.PMI0433	0.059	0	0	0.604	0.66	0.736	0.573	0.495	0.966
lysS	pheT	7102746	7101804	529507.PMI2008	529507.PMI1039	0.064	0	0.204	0	0.824	0.451	0.25	0.495	0.966
gltX	pheT	7102561	7101804	529507.PMI1818	529507.PMI1039	0.1	0	0	0	0.656	0.75	0.107	0.495	0.958
pheT	glnS	7101804	7101324	529507.PMI1039	529507.PMI0539	0.1	0	0	0	0.656	0.75	0.107	0.495	0.958
leuS	ileS	7101220	7100817	529507.PMI0433	529507.PMI0015	0.115	0	0.454	0.604	0.832	0.398	0.118	0.834	0.95
glnS	ileS	7101324	7100817	529507.PMI0539	529507.PMI0015	0.048	0.026	0	0	0.527	0.735	0.107	0.575	0.946
proS	ileS	7102997	7100817	529507.PMI2264	529507.PMI0015	0	0	0.269	0	0.585	0.568	0.118	0.585	0.943
proS	pheT	7102997	7101804	529507.PMI2264	529507.PMI1039	0.044	0	0	0	0.694	0.509	0.118	0.61	0.941
proS	argS	7102997	7101861	529507.PMI2264	529507.PMI1103	0.062	0	0	0	0.58	0.527	0.118	0.65	0.931
argS	glnS	7101861	7101324	529507.PMI1103	529507.PMI0539	0.055	0	0	0	0.516	0.747	0.107	0.388	0.925
gltX	argS	7102561	7101861	529507.PMI1818	529507.PMI1103	0.059	0	0	0	0.516	0.747	0.107	0.382	0.924
argS	leuS	7101861	7101220	529507.PMI1103	529507.PMI0433	0.043	0	0	0	0.538	0.397	0.118	0.701	0.916
lysS	leuS	7102746	7101220	529507.PMI2008	529507.PMI0433	0.06	0	0	0	0.559	0.427	0.25	0.577	0.91
pheT	leuS	7101804	7101220	529507.PMI1039	529507.PMI0433	0.076	0	0	0	0.579	0.39	0.118	0.605	0.902
pheT	asnS	7101804	7101546	529507.PMI1039	529507.PMI0766	0.06	0	0	0	0.63	0.491	0.107	0.462	0.899
lysS	ileS	7102746	7100817	529507.PMI2008	529507.PMI0015	0.044	0	0.392	0	0.574	0.43	0.25	0.211	0.897
lysS	argS	7102746	7101861	529507.PMI2008	529507.PMI1103	0.042	0	0	0	0.661	0.403	0.25	0.387	0.894
proS	glnS	7102997	7101324	529507.PMI2264	529507.PMI0539	0.067	0	0	0	0.524	0.461	0.107	0.562	0.889
argS	asnS	7101861	7101546	529507.PMI1103	529507.PMI0766	0.045	0	0.153	0	0.522	0.651	0.107	0.211	0.882
asnS	leuS	7101546	7101220	529507.PMI0766	529507.PMI0433	0.381	0	0	0	0.288	0.674	0.107	0.18	0.875
lysS	gltX	7102746	7102561	529507.PMI2008	529507.PMI1818	0.286	0	0	0	0.581	0.424	0.135	0.251	0.868
gltX	leuS	7102561	7101220	529507.PMI1818	529507.PMI0433	0.046	0	0.306	0	0.582	0.372	0.107	0.257	0.857
lysS	glnS	7102746	7101324	529507.PMI2008	529507.PMI0539	0.286	0	0	0	0.581	0.424	0.135	0.129	0.846
asnS	ileS	7101546	7100817	529507.PMI0766	529507.PMI0015	0.043	0	0	0	0.455	0.65	0.107	0.183	0.842
asnS	glnS	7101546	7101324	529507.PMI0766	529507.PMI0539	0.046	0	0.242	0	0.286	0.526	0.103	0.408	0.839
proS	lysS	7102997	7102746	529507.PMI2264	529507.PMI2008	0	0	0	0	0.529	0.427	0.25	0.211	0.818
proS	gltX	7102997	7102561	529507.PMI2264	529507.PMI1818	0.067	0	0	0	0.524	0.461	0.107	0.237	0.807
proS	asnS	7102997	7101546	529507.PMI2264	529507.PMI0766	0.044	0	0	0	0.484	0.573	0.107	0.133	0.807
glnS	leuS	7101324	7101220	529507.PMI0539	529507.PMI0433	0.062	0	0	0	0.582	0.372	0.107	0.142	0.776
pheS	ileS	7101803	7100817	529507.PMI1038	529507.PMI0015	0.11	0	0.183	0	0.478	0.328	0	0.234	0.769
lysS	pheS	7102746	7101803	529507.PMI2008	529507.PMI1038	0.051	0	0.361	0	0.573	0	0	0.211	0.768
proS	pheS	7102997	7101803	529507.PMI2264	529507.PMI1038	0	0	0	0	0.43	0	0	0.558	0.737
gltX	asnS	7102561	7101546	529507.PMI1818	529507.PMI0766	0.046	0	0	0	0.286	0.526	0.103	0.211	0.729
pheS	leuS	7101803	7101220	529507.PMI1038	529507.PMI0433	0.061	0	0	0	0.551	0	0	0.386	0.718
lysS	asnS	7102746	7101546	529507.PMI2008	529507.PMI0766	0	0	0	0.609	0.384	0.403	0.135	0.211	0.678
argS	pheS	7101861	7101803	529507.PMI1103	529507.PMI1038	0.381	0	0	0	0.294	0	0	0.281	0.658
gltX	glnS	7102561	7101324	529507.PMI1818	529507.PMI0539	0.381	0	0	0.608	0.096	0	0	0.65	0.561
pheS	asnS	7101803	7101546	529507.PMI1038	529507.PMI0766	0	0	0	0	0.463	0	0	0.184	0.543
gltX	pheS	7102561	7101803	529507.PMI1818	529507.PMI1038	0.065	0	0	0	0.28	0.058	0	0.29	0.489
murF	ddl	7102808	7101989	529507.PMI2074	529507.PMI1243	0.381	0	0.696	0	0.119	0	0.965	0.651	0.997
dadB	ddl	7102254	7101989	529507.PMI1508	529507.PMI1243	0.381	0	0.29	0	0	0	0.956	0.633	0.992
alr	ddl	7103458	7101989	529507.PMI2742	529507.PMI1243	0.381	0	0.3	0	0	0	0.956	0.647	0.992
dadA	dadB	7102255	7102254	529507.PMI1509	529507.PMI1508	0.884	0	0	0	0.487	0	0.673	0.566	0.99
PMI1774	ddl	7102519	7101989	529507.PMI1774	529507.PMI1243	0.381	0	0	0	0	0	0.956	0.358	0.981
alr	murF	7103458	7102808	529507.PMI2742	529507.PMI2074	0.381	0.446	0.644	0	0	0	0.8	0.124	0.974
murF	dadB	7102808	7102254	529507.PMI2074	529507.PMI1508	0.381	0.397	0.629	0	0	0	0.8	0.124	0.971
avtA	dadB	7103568	7102254	529507.PMI2852	529507.PMI1508	0	0	0	0	0.058	0.12	0.965	0	0.969
avtA	alr	7103568	7103458	529507.PMI2852	529507.PMI2742	0	0	0	0	0.058	0.12	0.965	0	0.969
avtA	PMI1774	7103568	7102519	529507.PMI2852	529507.PMI1774	0	0	0	0	0.058	0.12	0.965	0	0.969
gltB	PMI1765	7104367	7102510	529507.PMI3677	529507.PMI1765	0.43	0	0	0	0.154	0.13	0.603	0.786	0.957
gltB	dadB	7104367	7102254	529507.PMI3677	529507.PMI1508	0.06	0	0	0	0	0.945	0	0.165	0.953
murF	PMI1774	7102808	7102519	529507.PMI2074	529507.PMI1774	0.381	0.248	0.512	0	0	0	0.8	0.111	0.952
gltB	PMI1774	7104367	7102519	529507.PMI3677	529507.PMI1774	0.06	0	0	0	0	0.945	0	0.061	0.947
gltB	alr	7104367	7103458	529507.PMI3677	529507.PMI2742	0.06	0	0	0	0	0.945	0	0.061	0.947
PMI1765	dadB	7102510	7102254	529507.PMI1765	529507.PMI1508	0.062	0	0	0	0	0	0.931	0.177	0.942
alr	PMI1765	7103458	7102510	529507.PMI2742	529507.PMI1765	0.062	0	0	0	0	0	0.931	0.177	0.942
PMI1701	dadB	7102447	7102254	529507.PMI1701	529507.PMI1508	0.381	0	0	0	0	0	0.9	0.125	0.941
alr	dadA	7103458	7102255	529507.PMI2742	529507.PMI1509	0.371	0	0	0	0.487	0	0.673	0.509	0.941
alr	PMI1701	7103458	7102447	529507.PMI2742	529507.PMI1701	0.381	0	0	0	0	0	0.9	0.125	0.941
PMI1774	PMI1701	7102519	7102447	529507.PMI1774	529507.PMI1701	0.381	0	0	0	0	0	0.9	0.125	0.941
PMI1774	PMI1765	7102519	7102510	529507.PMI1774	529507.PMI1765	0.062	0	0	0	0	0	0.927	0.177	0.939
PMI1701	ddl	7102447	7101989	529507.PMI1701	529507.PMI1243	0.05	0	0	0	0	0	0.9	0	0.9
PMI1774	dadA	7102519	7102255	529507.PMI1774	529507.PMI1509	0.371	0	0	0	0.458	0	0.587	0.18	0.869
mnmC	dadB	7102540	7102254	529507.PMI1796	529507.PMI1508	0.371	0	0	0	0.226	0	0.733	0.109	0.868
mnmC	PMI1774	7102540	7102519	529507.PMI1796	529507.PMI1774	0.371	0	0	0	0.226	0	0.733	0.109	0.868
alr	mnmC	7103458	7102540	529507.PMI2742	529507.PMI1796	0.371	0	0	0	0.226	0	0.733	0.109	0.868
alr	PMI1774	7103458	7102519	529507.PMI2742	529507.PMI1774	0	0	0.701	0.63	0	0	0.8	0.109	0.854
PMI1774	dadB	7102519	7102254	529507.PMI1774	529507.PMI1508	0	0	0.707	0.653	0	0	0.8	0.109	0.851
alr	dadB	7103458	7102254	529507.PMI2742	529507.PMI1508	0	0	0.778	0.876	0	0	0.8	0	0.819
murF	PMI1701	7102808	7102447	529507.PMI2074	529507.PMI1701	0.076	0	0	0	0	0.067	0.8	0	0.812
avtA	PMI1765	7103568	7102510	529507.PMI2852	529507.PMI1765	0	0	0	0	0.065	0	0.8	0.053	0.807
gltB	PMI1701	7104367	7102447	529507.PMI3677	529507.PMI1701	0.044	0	0	0	0	0	0.539	0.563	0.79
PMI1765	PMI1701	7102510	7102447	529507.PMI1765	529507.PMI1701	0.064	0	0	0	0.062	0	0.539	0.111	0.592
avtA	PMI1701	7103568	7102447	529507.PMI2852	529507.PMI1701	0	0	0	0	0.06	0	0.539	0.075	0.564
mnmC	dadA	7102540	7102255	529507.PMI1796	529507.PMI1509	0.302	0	0	0	0	0.398	0	0	0.561
murF	mraY	7102808	7102807	529507.PMI2074	529507.PMI2073	0.902	0	0.753	0	0.123	0	0.965	0.785	0.999
murF	ddl	7102808	7101989	529507.PMI2074	529507.PMI1243	0.381	0	0.696	0	0.119	0	0.965	0.651	0.997
dadB	ddl	7102254	7101989	529507.PMI1508	529507.PMI1243	0.381	0	0.29	0	0	0	0.956	0.633	0.992
dadA	dadB	7102255	7102254	529507.PMI1509	529507.PMI1508	0.884	0	0	0	0.487	0	0.673	0.566	0.99
PMI1774	ddl	7102519	7101989	529507.PMI1774	529507.PMI1243	0.381	0	0	0	0	0	0.956	0.358	0.981
murF	dadB	7102808	7102254	529507.PMI2074	529507.PMI1508	0.381	0.397	0.629	0	0	0	0.8	0.124	0.971
avtA	dadB	7103568	7102254	529507.PMI2852	529507.PMI1508	0	0	0	0	0.058	0.12	0.965	0	0.969
avtA	PMI1774	7103568	7102519	529507.PMI2852	529507.PMI1774	0	0	0	0	0.058	0.12	0.965	0	0.969
gltB	PMI1765	7104367	7102510	529507.PMI3677	529507.PMI1765	0.43	0	0	0	0.154	0.13	0.603	0.786	0.957
gltB	dadB	7104367	7102254	529507.PMI3677	529507.PMI1508	0.06	0	0	0	0	0.945	0	0.165	0.953
murF	PMI1774	7102808	7102519	529507.PMI2074	529507.PMI1774	0.381	0.248	0.512	0	0	0	0.8	0.111	0.952
gltB	PMI1774	7104367	7102519	529507.PMI3677	529507.PMI1774	0.06	0	0	0	0	0.945	0	0.061	0.947
PMI1765	dadB	7102510	7102254	529507.PMI1765	529507.PMI1508	0.062	0	0	0	0	0	0.931	0.177	0.942
PMI1701	dadB	7102447	7102254	529507.PMI1701	529507.PMI1508	0.381	0	0	0	0	0	0.9	0.125	0.941
PMI1774	PMI1701	7102519	7102447	529507.PMI1774	529507.PMI1701	0.381	0	0	0	0	0	0.9	0.125	0.941
PMI1774	PMI1765	7102519	7102510	529507.PMI1774	529507.PMI1765	0.062	0	0	0	0	0	0.927	0.177	0.939
PMI1701	ddl	7102447	7101989	529507.PMI1701	529507.PMI1243	0.05	0	0	0	0	0	0.9	0	0.9
PMI1774	dadA	7102519	7102255	529507.PMI1774	529507.PMI1509	0.371	0	0	0	0.458	0	0.587	0.18	0.869
mnmC	PMI1774	7102540	7102519	529507.PMI1796	529507.PMI1774	0.371	0	0	0	0.226	0	0.733	0.109	0.868
mnmC	dadB	7102540	7102254	529507.PMI1796	529507.PMI1508	0.371	0	0	0	0.226	0	0.733	0.109	0.868
PMI1774	dadB	7102519	7102254	529507.PMI1774	529507.PMI1508	0	0	0.707	0.653	0	0	0.8	0.109	0.851
mraY	ddl	7102807	7101989	529507.PMI2073	529507.PMI1243	0.381	0	0.412	0	0.063	0	0	0.574	0.835
mraY	dadB	7102807	7102254	529507.PMI2073	529507.PMI1508	0	0	0.498	0	0.063	0.12	0.581	0.136	0.822
murF	PMI1701	7102808	7102447	529507.PMI2074	529507.PMI1701	0.076	0	0	0	0	0.067	0.8	0	0.812
avtA	PMI1765	7103568	7102510	529507.PMI2852	529507.PMI1765	0	0	0	0	0.065	0	0.8	0.053	0.807
gltB	PMI1701	7104367	7102447	529507.PMI3677	529507.PMI1701	0.044	0	0	0	0	0	0.539	0.563	0.79
mraY	PMI1774	7102807	7102519	529507.PMI2073	529507.PMI1774	0	0	0.31	0	0.063	0.119	0.581	0.136	0.756
PMI1765	PMI1701	7102510	7102447	529507.PMI1765	529507.PMI1701	0.064	0	0	0	0.062	0	0.539	0.111	0.592
avtA	PMI1701	7103568	7102447	529507.PMI2852	529507.PMI1701	0	0	0	0	0.06	0	0.539	0.075	0.564
mnmC	dadA	7102540	7102255	529507.PMI1796	529507.PMI1509	0.302	0	0	0	0	0.398	0	0	0.561
murF	ddl	7102808	7101989	529507.PMI2074	529507.PMI1243	0.381	0	0.696	0	0.119	0	0.965	0.651	0.997
alr	ddl	7103458	7101989	529507.PMI2742	529507.PMI1243	0.381	0	0.3	0	0	0	0.956	0.647	0.992
PMI1774	ddl	7102519	7101989	529507.PMI1774	529507.PMI1243	0.381	0	0	0	0	0	0.956	0.358	0.981
alr	murF	7103458	7102808	529507.PMI2742	529507.PMI2074	0.381	0.446	0.644	0	0	0	0.8	0.124	0.974
avtA	PMI1774	7103568	7102519	529507.PMI2852	529507.PMI1774	0	0	0	0	0.058	0.12	0.965	0	0.969
avtA	alr	7103568	7103458	529507.PMI2852	529507.PMI2742	0	0	0	0	0.058	0.12	0.965	0	0.969
gltB	PMI1765	7104367	7102510	529507.PMI3677	529507.PMI1765	0.43	0	0	0	0.154	0.13	0.603	0.786	0.957
murF	PMI1774	7102808	7102519	529507.PMI2074	529507.PMI1774	0.381	0.248	0.512	0	0	0	0.8	0.111	0.952
gltB	PMI1774	7104367	7102519	529507.PMI3677	529507.PMI1774	0.06	0	0	0	0	0.945	0	0.061	0.947
gltB	alr	7104367	7103458	529507.PMI3677	529507.PMI2742	0.06	0	0	0	0	0.945	0	0.061	0.947
alr	PMI1765	7103458	7102510	529507.PMI2742	529507.PMI1765	0.062	0	0	0	0	0	0.931	0.177	0.942
alr	PMI1701	7103458	7102447	529507.PMI2742	529507.PMI1701	0.381	0	0	0	0	0	0.9	0.125	0.941
PMI1774	PMI1701	7102519	7102447	529507.PMI1774	529507.PMI1701	0.381	0	0	0	0	0	0.9	0.125	0.941
alr	dadA	7103458	7102255	529507.PMI2742	529507.PMI1509	0.371	0	0	0	0.487	0	0.673	0.509	0.941
PMI1774	PMI1765	7102519	7102510	529507.PMI1774	529507.PMI1765	0.062	0	0	0	0	0	0.927	0.177	0.939
alr	dnaB	7103458	7103457	529507.PMI2742	529507.PMI2741	0.816	0.422	0.159	0	0.125	0	0	0.12	0.919
PMI1701	ddl	7102447	7101989	529507.PMI1701	529507.PMI1243	0.05	0	0	0	0	0	0.9	0	0.9
PMI1774	dadA	7102519	7102255	529507.PMI1774	529507.PMI1509	0.371	0	0	0	0.458	0	0.587	0.18	0.869
mnmC	PMI1774	7102540	7102519	529507.PMI1796	529507.PMI1774	0.371	0	0	0	0.226	0	0.733	0.109	0.868
alr	mnmC	7103458	7102540	529507.PMI2742	529507.PMI1796	0.371	0	0	0	0.226	0	0.733	0.109	0.868
alr	PMI1774	7103458	7102519	529507.PMI2742	529507.PMI1774	0	0	0.701	0.63	0	0	0.8	0.109	0.854
murF	PMI1701	7102808	7102447	529507.PMI2074	529507.PMI1701	0.076	0	0	0	0	0.067	0.8	0	0.812
avtA	PMI1765	7103568	7102510	529507.PMI2852	529507.PMI1765	0	0	0	0	0.065	0	0.8	0.053	0.807
gltB	PMI1701	7104367	7102447	529507.PMI3677	529507.PMI1701	0.044	0	0	0	0	0	0.539	0.563	0.79
PMI1765	PMI1701	7102510	7102447	529507.PMI1765	529507.PMI1701	0.064	0	0	0	0.062	0	0.539	0.111	0.592
avtA	PMI1701	7103568	7102447	529507.PMI2852	529507.PMI1701	0	0	0	0	0.06	0	0.539	0.075	0.564
mnmC	dadA	7102540	7102255	529507.PMI1796	529507.PMI1509	0.302	0	0	0	0	0.398	0	0	0.561
dnaB	PMI1774	7103457	7102519	529507.PMI2741	529507.PMI1774	0.376	0.003	0	0	0.088	0	0	0.12	0.455
fadB	fadE	7104241	7101136	529507.PMI3550	529507.PMI0348	0.478	0	0.597	0	0.663	0.266	0.974	0.651	0.999
fadJ	fadE	7102551	7101136	529507.PMI1807	529507.PMI0348	0.478	0	0.497	0	0.663	0.266	0.974	0.651	0.999
fixA	fixB	7103369	7103368	529507.PMI2653	529507.PMI2652	0.875	0.1	0.778	0	0.853	0.893	0.579	0.815	0.999
fadB	fadJ	7104241	7102551	529507.PMI3550	529507.PMI1807	0.478	0	0.778	0.757	0.484	0.461	0.974	0.495	0.996
fadB	adhE	7104241	7102232	529507.PMI3550	529507.PMI1486	0.091	0	0	0	0.601	0.128	0.752	0.797	0.981
fadJ	adhE	7102551	7102232	529507.PMI1807	529507.PMI1486	0.091	0	0	0	0.601	0.128	0.752	0.786	0.98
fadH	fadB	7104392	7104241	529507.PMI3702	529507.PMI3550	0.104	0	0.424	0	0.239	0	0.752	0.786	0.975
fadH	fadJ	7104392	7102551	529507.PMI3702	529507.PMI1807	0.104	0	0.374	0	0.239	0	0.752	0.786	0.973
fixB	fadJ	7103368	7102551	529507.PMI2652	529507.PMI1807	0.478	0	0.212	0	0.348	0.384	0.752	0.477	0.973
fadB	fixB	7104241	7103368	529507.PMI3550	529507.PMI2652	0.478	0	0.224	0	0.348	0.384	0.752	0.477	0.973
caiD	fixB	7103374	7103368	529507.PMI2658	529507.PMI2652	0.381	0	0.763	0	0.158	0.183	0.539	0.528	0.972
fadH	gltB	7104392	7104367	529507.PMI3702	529507.PMI3677	0.479	0	0	0	0.069	0	0.752	0.576	0.942
gltB	purL	7104367	7102617	529507.PMI3677	529507.PMI1875	0.047	0	0	0	0.729	0	0	0.786	0.939
caiD	fixA	7103374	7103369	529507.PMI2658	529507.PMI2653	0.381	0	0.763	0	0.154	0	0	0.414	0.917
fadH	adhE	7104392	7102232	529507.PMI3702	529507.PMI1486	0.326	0	0	0	0.084	0	0.4	0.786	0.91
caiD	fadE	7103374	7101136	529507.PMI2658	529507.PMI0348	0.378	0	0	0	0.46	0.266	0.626	0.109	0.902
fadH	fixB	7104392	7103368	529507.PMI3702	529507.PMI2652	0.108	0	0	0	0.085	0.859	0	0.115	0.884
fadH	fixA	7104392	7103369	529507.PMI3702	529507.PMI2653	0.13	0	0	0	0	0.859	0	0.111	0.881
fadB	caiD	7104241	7103374	529507.PMI3550	529507.PMI2658	0.381	0	0.618	0.657	0.225	0.237	0.591	0.109	0.868
fadH	caiD	7104392	7103374	529507.PMI3702	529507.PMI2658	0.064	0.087	0	0	0.123	0	0.752	0.403	0.868
caiD	fadJ	7103374	7102551	529507.PMI2658	529507.PMI1807	0.381	0	0.667	0.692	0.225	0.237	0.591	0.109	0.867
hmp	adhE	7102610	7102232	529507.PMI1868	529507.PMI1486	0	0	0	0	0.347	0	0.539	0.592	0.866
fixA	fadJ	7103369	7102551	529507.PMI2653	529507.PMI1807	0.478	0	0.192	0	0.347	0.183	0	0.475	0.86
fadB	fixA	7104241	7103369	529507.PMI3550	529507.PMI2653	0.478	0	0.167	0	0.347	0.183	0	0.475	0.856
fadH	fadE	7104392	7101136	529507.PMI3702	529507.PMI0348	0.062	0	0.423	0	0.074	0	0.578	0.394	0.848
fadH	hmp	7104392	7102610	529507.PMI3702	529507.PMI1868	0.048	0	0	0	0.252	0	0	0.786	0.834
purL	adhE	7102617	7102232	529507.PMI1875	529507.PMI1486	0.057	0	0	0	0.133	0	0	0.805	0.827
fadH	purL	7104392	7102617	529507.PMI3702	529507.PMI1875	0.103	0	0	0	0.182	0	0	0.782	0.826
gltB	adhE	7104367	7102232	529507.PMI3677	529507.PMI1486	0.063	0	0	0	0.065	0	0	0.786	0.796
fixB	fadE	7103368	7101136	529507.PMI2652	529507.PMI0348	0.381	0	0	0	0.129	0.41	0.392	0.109	0.796
caiD	adhE	7103374	7102232	529507.PMI2658	529507.PMI1486	0.063	0	0	0	0.345	0.128	0.535	0.275	0.786
adhE	fadE	7102232	7101136	529507.PMI1486	529507.PMI0348	0.061	0	0	0	0.225	0	0.539	0.235	0.709
gltB	fadJ	7104367	7102551	529507.PMI3677	529507.PMI1807	0	0	0.157	0	0.085	0	0	0.647	0.703
gltB	fadB	7104367	7104241	529507.PMI3677	529507.PMI3550	0	0	0	0	0.085	0	0	0.647	0.663
fixA	fadE	7103369	7101136	529507.PMI2653	529507.PMI0348	0.381	0	0	0	0.102	0	0.392	0.109	0.658
hmp	fadJ	7102610	7102551	529507.PMI1868	529507.PMI1807	0.067	0	0	0	0.054	0	0.539	0.115	0.591
fadB	hmp	7104241	7102610	529507.PMI3550	529507.PMI1868	0.067	0	0	0	0.054	0	0.539	0.115	0.591
fixA	adhE	7103369	7102232	529507.PMI2653	529507.PMI1486	0.062	0	0	0	0.091	0	0.527	0	0.561
caiD	hmp	7103374	7102610	529507.PMI2658	529507.PMI1868	0.047	0	0	0	0	0	0.539	0.042	0.542
fabF	fabH	7101635	7101631	529507.PMI0863	529507.PMI0859	0.596	0	0.719	0	0.661	0	0.955	0.771	0.999
accB	accC	7104318	7104317	529507.PMI3628	529507.PMI3627	0.872	0	0.754	0	0.81	0.461	0.914	0.715	0.999
PMI2269	accD	7103002	7102532	529507.PMI2269	529507.PMI1787	0.381	0.849	0.778	0	0.469	0.837	0.912	0.221	0.999
PMI2908	PMI2902	7103624	7103618	529507.PMI2908	529507.PMI2902	0.876	0	0.775	0	0.877	0.431	0.547	0.109	0.999
PMI2902	fabB	7103618	7102539	529507.PMI2902	529507.PMI1795	0.375	0.128	0.761	0	0.877	0.431	0.951	0.109	0.999
PMI2902	fabF	7103618	7101635	529507.PMI2902	529507.PMI0863	0.375	0.276	0.776	0	0.877	0.431	0.951	0.109	0.999
fabB	fabH	7102539	7101631	529507.PMI1795	529507.PMI0859	0.377	0	0.327	0	0.661	0	0.955	0.783	0.998
PMI2907	PMI2902	7103623	7103618	529507.PMI2907	529507.PMI2902	0.876	0	0.587	0	0.877	0.431	0.539	0.109	0.998
PMI2902	PMI0754	7103618	7101535	529507.PMI2902	529507.PMI0754	0.375	0	0	0	0.877	0.431	0.951	0.109	0.997
accC	accD	7104317	7102532	529507.PMI3627	529507.PMI1787	0.381	0	0.685	0	0.218	0.815	0.912	0.249	0.997
PMI2902	fabH	7103618	7101631	529507.PMI2902	529507.PMI0859	0.343	0	0.671	0	0.661	0	0.952	0.109	0.996
accC	PMI2269	7104317	7103002	529507.PMI3627	529507.PMI2269	0.381	0	0.679	0	0.271	0.749	0.914	0.211	0.996
accB	accD	7104318	7102532	529507.PMI3628	529507.PMI1787	0.381	0	0.777	0	0.149	0	0.912	0.576	0.994
accB	PMI2269	7104318	7103002	529507.PMI3628	529507.PMI2269	0.381	0	0.777	0	0.2	0	0.914	0.232	0.991
accB	PMI2902	7104318	7103618	529507.PMI3628	529507.PMI2902	0.381	0	0.16	0	0.591	0.174	0.952	0.109	0.99
accC	PMI2902	7104317	7103618	529507.PMI3627	529507.PMI2902	0.381	0	0.227	0	0.536	0.174	0.952	0.109	0.99
fabH	PMI0754	7101631	7101535	529507.PMI0859	529507.PMI0754	0.377	0	0	0	0.661	0	0.951	0.109	0.989
PMI2902	accD	7103618	7102532	529507.PMI2902	529507.PMI1787	0.381	0	0.338	0	0.283	0.119	0.952	0.109	0.986
PMI2902	PMI2269	7103618	7103002	529507.PMI2902	529507.PMI2269	0.381	0	0.267	0	0.224	0.119	0.952	0.109	0.983
accC	fabH	7104317	7101631	529507.PMI3627	529507.PMI0859	0.381	0	0.248	0	0.29	0	0.9	0.211	0.969
PMI2269	fabH	7103002	7101631	529507.PMI2269	529507.PMI0859	0.381	0	0.191	0	0.264	0.119	0.9	0.177	0.967
accD	fabH	7102532	7101631	529507.PMI1787	529507.PMI0859	0.381	0	0.165	0	0.124	0.119	0.9	0.211	0.961
PMI2908	fabH	7103624	7101631	529507.PMI2908	529507.PMI0859	0.377	0	0.592	0	0.661	0	0.539	0.109	0.958
accB	fabH	7104318	7101631	529507.PMI3628	529507.PMI0859	0.381	0	0	0	0.185	0.119	0.9	0.211	0.958
fabB	fabF	7102539	7101635	529507.PMI1795	529507.PMI0863	0	0	0.761	0.813	0	0	0.9	0.423	0.92
PMI2908	PMI2907	7103624	7103623	529507.PMI2908	529507.PMI2907	0.862	0	0.736	0.607	0	0	0	0	0.902
accB	fabB	7104318	7102539	529507.PMI3628	529507.PMI1795	0.381	0	0.178	0	0.582	0.174	0.135	0.482	0.902
PMI2907	fabH	7103623	7101631	529507.PMI2907	529507.PMI0859	0.377	0	0	0	0.661	0	0.539	0.109	0.901
fabF	PMI0754	7101635	7101535	529507.PMI0863	529507.PMI0754	0	0	0	0	0	0	0.9	0	0.9
accB	fabF	7104318	7101635	529507.PMI3628	529507.PMI0863	0.381	0	0	0	0.582	0.174	0.135	0.482	0.886
accC	fabF	7104317	7101635	529507.PMI3627	529507.PMI0863	0.381	0	0.388	0	0.569	0.176	0.105	0.21	0.882
PMI2269	fabF	7103002	7101635	529507.PMI2269	529507.PMI0863	0.381	0	0.244	0	0.661	0	0.25	0.138	0.878
PMI2269	fabB	7103002	7102539	529507.PMI2269	529507.PMI1795	0.381	0	0.194	0	0.661	0	0.25	0.138	0.87
accC	fabB	7104317	7102539	529507.PMI3627	529507.PMI1795	0.381	0	0.277	0	0.569	0.176	0.105	0.21	0.861
PMI2908	PMI2269	7103624	7103002	529507.PMI2908	529507.PMI2269	0.381	0	0.156	0	0.661	0	0.25	0.109	0.86
PMI2269	PMI0754	7103002	7101535	529507.PMI2269	529507.PMI0754	0.381	0	0	0	0.661	0	0.25	0.109	0.841
PMI2907	PMI2269	7103623	7103002	529507.PMI2907	529507.PMI2269	0.381	0	0	0	0.661	0	0.25	0.109	0.841
accC	PMI2908	7104317	7103624	529507.PMI3627	529507.PMI2908	0.381	0	0.223	0	0.569	0.176	0.105	0.109	0.832
accB	PMI2908	7104318	7103624	529507.PMI3628	529507.PMI2908	0.381	0	0	0	0.582	0.174	0.135	0.109	0.805
accB	PMI2907	7104318	7103623	529507.PMI3628	529507.PMI2907	0.381	0	0	0	0.582	0.174	0.135	0.109	0.805
accB	PMI0754	7104318	7101535	529507.PMI3628	529507.PMI0754	0.381	0	0	0	0.582	0.174	0.135	0.109	0.805
fabB	PMI0754	7102539	7101535	529507.PMI1795	529507.PMI0754	0	0	0	0	0	0	0.8	0	0.8
accC	PMI2907	7104317	7103623	529507.PMI3627	529507.PMI2907	0.381	0	0	0	0.569	0.176	0.105	0.109	0.792
accC	PMI0754	7104317	7101535	529507.PMI3627	529507.PMI0754	0.381	0	0	0	0.569	0.176	0.105	0.109	0.792
accD	fabF	7102532	7101635	529507.PMI1787	529507.PMI0863	0.381	0	0.354	0	0.154	0	0.25	0.232	0.769
fabB	accD	7102539	7102532	529507.PMI1795	529507.PMI1787	0.381	0	0.288	0	0.154	0	0.25	0.232	0.746
PMI2908	accD	7103624	7102532	529507.PMI2908	529507.PMI1787	0.381	0	0.198	0	0.154	0	0.25	0.109	0.668
PMI2907	accD	7103623	7102532	529507.PMI2907	529507.PMI1787	0.381	0	0	0	0.154	0	0.25	0.109	0.603
accD	PMI0754	7102532	7101535	529507.PMI1787	529507.PMI0754	0.381	0	0	0	0.154	0	0.25	0.109	0.603
guaB	guaA	7102292	7102291	529507.PMI1546	529507.PMI1545	0.791	0.513	0.633	0	0.999	0.945	0.974	0.794	0.999
purH	purB	7103484	7101658	529507.PMI2768	529507.PMI0886	0.381	0	0	0	0.77	0.187	0.965	0.593	0.998
purH	guaB	7103484	7102292	529507.PMI2768	529507.PMI1546	0.434	0	0	0	0.602	0.236	0.974	0.495	0.997
purH	PMI0627	7103484	7101411	529507.PMI2768	529507.PMI0627	0.381	0	0	0	0.77	0.187	0.965	0.109	0.995
PMI2981	purH	7103697	7103484	529507.PMI2981	529507.PMI2768	0.381	0	0	0	0.77	0.187	0.956	0.176	0.995
guaA	apt	7102291	7100937	529507.PMI1545	529507.PMI0138	0.348	0	0	0	0.661	0.441	0.9	0.495	0.992
gmk	guaA	7103578	7102291	529507.PMI2862	529507.PMI1545	0	0	0	0	0.224	0	0.974	0.489	0.988
surE	guaB	7102972	7102292	529507.PMI2239	529507.PMI1546	0.303	0	0	0	0.062	0.122	0.974	0.089	0.984
PMI0627	apt	7101411	7100937	529507.PMI0627	529507.PMI0138	0.051	0	0	0	0.254	0.398	0.921	0.413	0.976
purB	apt	7101658	7100937	529507.PMI0886	529507.PMI0138	0.051	0	0	0	0.254	0.398	0.921	0.344	0.974
adk	purB	7102918	7101658	529507.PMI2184	529507.PMI0886	0	0	0	0	0.134	0.12	0.965	0.131	0.974
adk	PMI0627	7102918	7101411	529507.PMI2184	529507.PMI0627	0	0	0	0	0.134	0.119	0.965	0.109	0.973
deoD	apt	7103146	7100937	529507.PMI2413	529507.PMI0138	0.064	0	0	0	0	0	0.965	0.121	0.969
adk	apt	7102918	7100937	529507.PMI2184	529507.PMI0138	0.061	0	0	0	0.084	0	0.956	0.208	0.966
PMI2981	adk	7103697	7102918	529507.PMI2981	529507.PMI2184	0	0	0	0	0.134	0.119	0.956	0.124	0.966
PMI2981	apt	7103697	7100937	529507.PMI2981	529507.PMI0138	0.051	0	0	0	0.254	0.398	0.921	0.13	0.965
gmk	apt	7103578	7100937	529507.PMI2862	529507.PMI0138	0.077	0	0	0	0.118	0	0.951	0.211	0.964
deoD	surE	7103146	7102972	529507.PMI2413	529507.PMI2239	0.047	0	0	0	0	0	0.964	0	0.964
purH	guaA	7103484	7102291	529507.PMI2768	529507.PMI1545	0.478	0	0	0	0.824	0	0	0.493	0.949
surE	apt	7102972	7100937	529507.PMI2239	529507.PMI0138	0.381	0	0	0	0.061	0	0.9	0.066	0.938
surE	guaA	7102972	7102291	529507.PMI2239	529507.PMI1545	0.354	0	0	0	0	0	0.9	0	0.932
guaB	apt	7102292	7100937	529507.PMI1546	529507.PMI0138	0.067	0	0	0	0.353	0.177	0.752	0.495	0.926
surE	purB	7102972	7101658	529507.PMI2239	529507.PMI0886	0.287	0	0	0	0	0	0.9	0	0.925
PMI2981	surE	7103697	7102972	529507.PMI2981	529507.PMI2239	0.287	0	0	0	0	0	0.9	0	0.925
surE	PMI0627	7102972	7101411	529507.PMI2239	529507.PMI0627	0.287	0	0	0	0	0	0.9	0	0.925
guaA	PMI0627	7102291	7101411	529507.PMI1545	529507.PMI0627	0.478	0	0.258	0	0.662	0	0	0.495	0.925
purH	apt	7103484	7100937	529507.PMI2768	529507.PMI0138	0.076	0	0	0	0.085	0	0.9	0.211	0.924
PMI2981	guaA	7103697	7102291	529507.PMI2981	529507.PMI1545	0.478	0	0.252	0	0.662	0	0	0.495	0.924
gmk	surE	7103578	7102972	529507.PMI2862	529507.PMI2239	0	0	0	0	0.063	0	0.9	0.06	0.904
purH	surE	7103484	7102972	529507.PMI2768	529507.PMI2239	0.048	0	0	0	0.064	0	0.9	0	0.903
guaA	purB	7102291	7101658	529507.PMI1545	529507.PMI0886	0.478	0	0	0	0.662	0	0	0.495	0.903
surE	adk	7102972	7102918	529507.PMI2239	529507.PMI2184	0	0	0	0	0.061	0	0.9	0	0.902
guaB	purB	7102292	7101658	529507.PMI1546	529507.PMI0886	0.433	0	0.197	0	0.571	0	0	0.495	0.888
guaB	PMI0627	7102292	7101411	529507.PMI1546	529507.PMI0627	0.433	0	0	0	0.571	0	0	0.495	0.866
PMI2981	guaB	7103697	7102292	529507.PMI2981	529507.PMI1546	0.433	0	0	0	0.571	0	0	0.495	0.866
PMI2981	PMI0627	7103697	7101411	529507.PMI2981	529507.PMI0627	0	0	0.778	0.751	0	0	0.8	0	0.838
gmk	adk	7103578	7102918	529507.PMI2862	529507.PMI2184	0	0.008	0	0	0.102	0	0.584	0.578	0.828
purB	PMI0627	7101658	7101411	529507.PMI0886	529507.PMI0627	0	0	0	0.61	0.098	0	0.8	0	0.811
PMI2981	purB	7103697	7101658	529507.PMI2981	529507.PMI0886	0	0	0	0.607	0	0	0.8	0	0.8
adk	guaA	7102918	7102291	529507.PMI2184	529507.PMI1545	0	0	0	0	0.162	0	0	0.489	0.553
adk	guaB	7102918	7102292	529507.PMI2184	529507.PMI1546	0	0	0	0	0.097	0	0	0.48	0.51
gmk	guaB	7103578	7102292	529507.PMI2862	529507.PMI1546	0	0	0	0	0.079	0	0	0.484	0.504
btuD	btuC	7101807	7101806	529507.PMI1042	529507.PMI1041	0.87	0.003	0.634	0	0.061	0.837	0.912	0.678	0.999
PMI0230	PMI0229	7101026	7101025	529507.PMI0230	529507.PMI0229	0.907	0	0.778	0	0.7	0.435	0.912	0.211	0.999
PMI2677	PMI2676	7103393	7103392	529507.PMI2677	529507.PMI2676	0.907	0.005	0.778	0	0.7	0.435	0.912	0.317	0.999
PMI2677	hmuU	7103393	7102175	529507.PMI2677	529507.PMI1429	0.37	0.012	0.754	0	0.7	0.435	0.912	0.299	0.998
btuC	btuF	7101806	7101009	529507.PMI1041	529507.PMI0213	0.303	0	0.756	0	0.063	0.834	0.911	0.573	0.998
PMI2677	PMI0229	7103393	7101025	529507.PMI2677	529507.PMI0229	0.37	0	0.706	0	0.7	0.435	0.912	0.317	0.997
hmuU	PMI0230	7102175	7101026	529507.PMI1429	529507.PMI0230	0.37	0.017	0.648	0	0.7	0.435	0.912	0.211	0.996
PMI2676	PMI0230	7103392	7101026	529507.PMI2676	529507.PMI0230	0.37	0.006	0.568	0	0.7	0.435	0.912	0.211	0.996
btuD	btuF	7101807	7101009	529507.PMI1042	529507.PMI0213	0	0	0.48	0	0	0.773	0.911	0.234	0.99
hmuU	btuF	7102175	7101009	529507.PMI1429	529507.PMI0213	0.381	0	0.737	0	0.205	0	0.581	0.123	0.943
rnr	pgsA	7104071	7102266	529507.PMI3372	529507.PMI1520	0	0	0	0	0	0.929	0	0	0.929
PMI2676	btuF	7103392	7101009	529507.PMI2676	529507.PMI0213	0.381	0	0.653	0	0.205	0	0.581	0.123	0.925
pgsA	btuF	7102266	7101009	529507.PMI1520	529507.PMI0213	0	0	0	0	0	0.92	0	0	0.92
rnr	btuF	7104071	7101009	529507.PMI3372	529507.PMI0213	0.044	0	0	0	0	0.919	0	0	0.919
PMI0229	btuF	7101025	7101009	529507.PMI0229	529507.PMI0213	0.381	0	0.614	0	0.205	0	0.581	0.123	0.917
PMI2677	btuF	7103393	7101009	529507.PMI2677	529507.PMI0213	0.381	0	0.175	0	0.489	0	0.577	0.13	0.886
PMI0230	btuF	7101026	7101009	529507.PMI0230	529507.PMI0213	0.381	0	0	0	0.489	0	0.577	0.13	0.868
PMI2677	btuC	7103393	7101806	529507.PMI2677	529507.PMI1041	0.381	0.006	0.738	0	0	0	0	0.145	0.849
btuB	btuC	7103946	7101806	529507.PMI3246	529507.PMI1041	0.301	0	0.386	0	0	0	0.574	0.232	0.84
btuB	btuF	7103946	7101009	529507.PMI3246	529507.PMI0213	0.381	0	0.296	0	0.061	0	0.574	0.128	0.82
btuC	PMI0230	7101806	7101026	529507.PMI1041	529507.PMI0230	0.381	0.008	0.649	0	0	0	0	0	0.773
btuB	btuD	7103946	7101807	529507.PMI3246	529507.PMI1042	0	0	0.301	0	0	0.119	0.574	0.123	0.739
hmuU	btuD	7102175	7101807	529507.PMI1429	529507.PMI1042	0.048	0.006	0.566	0	0	0.119	0	0.141	0.645
PMI2676	btuD	7103392	7101807	529507.PMI2676	529507.PMI1042	0.048	0.002	0.435	0	0	0.119	0	0.143	0.539
btuB	PMI2676	7103946	7103392	529507.PMI3246	529507.PMI2676	0.381	0	0.186	0	0	0.119	0	0.075	0.534
btuB	hmuU	7103946	7102175	529507.PMI3246	529507.PMI1429	0.381	0	0.16	0	0	0.119	0	0.075	0.519
btuD	PMI0229	7101807	7101025	529507.PMI1042	529507.PMI0229	0.048	0	0.391	0	0	0.119	0	0.143	0.503
btuB	PMI0229	7103946	7101025	529507.PMI3246	529507.PMI0229	0.381	0	0	0	0	0.119	0	0.075	0.451
btuB	PMI0230	7103946	7101026	529507.PMI3246	529507.PMI0230	0.381	0	0	0	0	0	0	0.128	0.437
btuB	PMI2677	7103946	7103393	529507.PMI3246	529507.PMI2677	0.381	0	0	0	0	0	0	0.128	0.437
fabD	fabH	7101632	7101631	529507.PMI0860	529507.PMI0859	0.86	0.717	0.737	0	0.661	0	0.965	0.783	0.999
fabF	fabH	7101635	7101631	529507.PMI0863	529507.PMI0859	0.596	0	0.719	0	0.661	0	0.955	0.771	0.999
fabF	fabD	7101635	7101632	529507.PMI0863	529507.PMI0860	0.61	0.85	0.767	0	0.877	0.431	0.965	0.703	0.999
accB	accC	7104318	7104317	529507.PMI3628	529507.PMI3627	0.872	0	0.754	0	0.81	0.461	0.914	0.715	0.999
PMI2908	fabD	7103624	7101632	529507.PMI2908	529507.PMI0860	0.375	0.001	0.719	0	0.877	0.431	0.956	0.109	0.999
fabB	fabD	7102539	7101632	529507.PMI1795	529507.PMI0860	0.375	0.608	0.723	0	0.877	0.431	0.965	0.703	0.999
PMI2907	fabD	7103623	7101632	529507.PMI2907	529507.PMI0860	0.375	0	0.269	0	0.877	0.431	0.951	0.109	0.998
fabD	PMI0754	7101632	7101535	529507.PMI0860	529507.PMI0754	0.375	0	0	0	0.877	0.431	0.957	0.109	0.998
fabB	fabH	7102539	7101631	529507.PMI1795	529507.PMI0859	0.377	0	0.327	0	0.661	0	0.955	0.783	0.998
accC	accD	7104317	7102532	529507.PMI3627	529507.PMI1787	0.381	0	0.685	0	0.218	0.815	0.912	0.249	0.997
fabG	fabH	7101633	7101631	529507.PMI0861	529507.PMI0859	0.859	0	0.632	0	0.134	0	0.9	0.476	0.997
accD	fabD	7102532	7101632	529507.PMI1787	529507.PMI0860	0.381	0	0.396	0	0.283	0.119	0.965	0.671	0.996
accB	fabD	7104318	7101632	529507.PMI3628	529507.PMI0860	0.381	0	0.219	0	0.591	0.174	0.965	0.563	0.996
fabF	fabG	7101635	7101633	529507.PMI0863	529507.PMI0861	0.615	0	0.729	0	0.132	0.119	0.9	0.579	0.995
accC	fabD	7104317	7101632	529507.PMI3627	529507.PMI0860	0.381	0	0.243	0	0.536	0.174	0.965	0.231	0.994
accB	accD	7104318	7102532	529507.PMI3628	529507.PMI1787	0.381	0	0.777	0	0.149	0	0.912	0.576	0.994
fabG	fabD	7101633	7101632	529507.PMI0861	529507.PMI0860	0.901	0	0.74	0	0.494	0	0	0.564	0.993
fabB	fabG	7102539	7101633	529507.PMI1795	529507.PMI0861	0.38	0	0.597	0	0.132	0.119	0.9	0.579	0.99
fabH	PMI0754	7101631	7101535	529507.PMI0859	529507.PMI0754	0.377	0	0	0	0.661	0	0.951	0.109	0.989
accC	fabH	7104317	7101631	529507.PMI3627	529507.PMI0859	0.381	0	0.248	0	0.29	0	0.9	0.211	0.969
accD	fabH	7102532	7101631	529507.PMI1787	529507.PMI0859	0.381	0	0.165	0	0.124	0.119	0.9	0.211	0.961
PMI2908	fabH	7103624	7101631	529507.PMI2908	529507.PMI0859	0.377	0	0.592	0	0.661	0	0.539	0.109	0.958
accB	fabH	7104318	7101631	529507.PMI3628	529507.PMI0859	0.381	0	0	0	0.185	0.119	0.9	0.211	0.958
fabG	PMI0754	7101633	7101535	529507.PMI0861	529507.PMI0754	0.38	0	0	0	0.132	0.115	0.9	0.109	0.949
fabB	fabF	7102539	7101635	529507.PMI1795	529507.PMI0863	0	0	0.761	0.813	0	0	0.9	0.423	0.92
accB	fabB	7104318	7102539	529507.PMI3628	529507.PMI1795	0.381	0	0.178	0	0.582	0.174	0.135	0.482	0.902
PMI2908	PMI2907	7103624	7103623	529507.PMI2908	529507.PMI2907	0.862	0	0.736	0.607	0	0	0	0	0.902
PMI2907	fabH	7103623	7101631	529507.PMI2907	529507.PMI0859	0.377	0	0	0	0.661	0	0.539	0.109	0.901
fabF	PMI0754	7101635	7101535	529507.PMI0863	529507.PMI0754	0	0	0	0	0	0	0.9	0	0.9
accB	fabF	7104318	7101635	529507.PMI3628	529507.PMI0863	0.381	0	0	0	0.582	0.174	0.135	0.482	0.886
accC	fabF	7104317	7101635	529507.PMI3627	529507.PMI0863	0.381	0	0.388	0	0.569	0.176	0.105	0.21	0.882
accC	fabB	7104317	7102539	529507.PMI3627	529507.PMI1795	0.381	0	0.277	0	0.569	0.176	0.105	0.21	0.861
accC	PMI2908	7104317	7103624	529507.PMI3627	529507.PMI2908	0.381	0	0.223	0	0.569	0.176	0.105	0.109	0.832
accB	PMI2907	7104318	7103623	529507.PMI3628	529507.PMI2907	0.381	0	0	0	0.582	0.174	0.135	0.109	0.805
accB	PMI0754	7104318	7101535	529507.PMI3628	529507.PMI0754	0.381	0	0	0	0.582	0.174	0.135	0.109	0.805
accB	PMI2908	7104318	7103624	529507.PMI3628	529507.PMI2908	0.381	0	0	0	0.582	0.174	0.135	0.109	0.805
PMI2908	fabG	7103624	7101633	529507.PMI2908	529507.PMI0861	0.38	0	0.606	0	0.132	0.115	0	0.109	0.802
fabB	PMI0754	7102539	7101535	529507.PMI1795	529507.PMI0754	0	0	0	0	0	0	0.8	0	0.8
accC	PMI2907	7104317	7103623	529507.PMI3627	529507.PMI2907	0.381	0	0	0	0.569	0.176	0.105	0.109	0.792
accC	PMI0754	7104317	7101535	529507.PMI3627	529507.PMI0754	0.381	0	0	0	0.569	0.176	0.105	0.109	0.792
accD	fabF	7102532	7101635	529507.PMI1787	529507.PMI0863	0.381	0	0.354	0	0.154	0	0.25	0.232	0.769
fabB	accD	7102539	7102532	529507.PMI1795	529507.PMI1787	0.381	0	0.288	0	0.154	0	0.25	0.232	0.746
PMI2908	accD	7103624	7102532	529507.PMI2908	529507.PMI1787	0.381	0	0.198	0	0.154	0	0.25	0.109	0.668
accD	fabG	7102532	7101633	529507.PMI1787	529507.PMI0861	0.381	0	0.267	0	0.123	0	0	0.165	0.623
accD	PMI0754	7102532	7101535	529507.PMI1787	529507.PMI0754	0.381	0	0	0	0.154	0	0.25	0.109	0.603
PMI2907	accD	7103623	7102532	529507.PMI2907	529507.PMI1787	0.381	0	0	0	0.154	0	0.25	0.109	0.603
accC	fabG	7104317	7101633	529507.PMI3627	529507.PMI0861	0.381	0	0.194	0	0.096	0	0	0.124	0.552
PMI2907	fabG	7103623	7101633	529507.PMI2907	529507.PMI0861	0.38	0	0	0	0.132	0.115	0	0.109	0.518
accB	fabG	7104318	7101633	529507.PMI3628	529507.PMI0861	0.381	0	0	0	0.069	0	0	0.116	0.446
uup	rlmL	7101554	7101553	529507.PMI0775	529507.PMI0774	0.917	0	0.403	0	0.156	0	0	0.119	0.958
rlmL	ribD	7101553	7100881	529507.PMI0774	529507.PMI0081	0.046	0	0	0	0.063	0	0	0.786	0.791
mnmC	thiI	7102540	7100896	529507.PMI1796	529507.PMI0097	0.063	0	0	0	0	0	0	0.743	0.748
rlmL	thiI	7101553	7100896	529507.PMI0774	529507.PMI0097	0.373	0	0.195	0	0.41	0	0	0.176	0.721
rlmB	rlmL	7104072	7101553	529507.PMI3373	529507.PMI0774	0.438	0	0	0	0.084	0.461	0	0.065	0.705
trmH	rlmL	7103581	7101553	529507.PMI2865	529507.PMI0774	0.438	0	0	0	0.084	0.461	0	0.054	0.702
rlmL	PMI0401	7101553	7101188	529507.PMI0774	529507.PMI0401	0.438	0	0	0	0.084	0.461	0	0.054	0.702
mnmC	rlmL	7102540	7101553	529507.PMI1796	529507.PMI0774	0.401	0	0	0	0.13	0.438	0	0	0.681
rlmL	PMI0773	7101553	7101552	529507.PMI0774	529507.PMI0773	0.637	0	0	0	0.061	0.129	0	0	0.678
PMI2985	rlmL	7103701	7101553	529507.PMI2985	529507.PMI0774	0.34	0.003	0	0	0.126	0.178	0	0.383	0.668
ksgA	rlmL	7103067	7101553	529507.PMI2334	529507.PMI0774	0.325	0	0	0	0.134	0	0	0.479	0.668
uup	PMI0773	7101554	7101552	529507.PMI0775	529507.PMI0773	0.647	0	0	0	0.054	0	0	0	0.653
thiI	ribD	7100896	7100881	529507.PMI0097	529507.PMI0081	0.062	0	0	0	0	0	0	0.568	0.577
ksgA	uup	7103067	7101554	529507.PMI2334	529507.PMI0775	0.298	0	0	0	0.263	0.127	0	0.063	0.52
rlmB	ksgA	7104072	7103067	529507.PMI3373	529507.PMI2334	0.046	0	0.153	0	0.325	0	0	0.126	0.459
PMI2985	trmH	7103701	7103581	529507.PMI2985	529507.PMI2865	0.065	0	0	0	0.102	0.341	0	0.075	0.419
rlmB	PMI2985	7104072	7103701	529507.PMI3373	529507.PMI2985	0.065	0	0	0	0.102	0.341	0	0.075	0.419
PMI2985	PMI0401	7103701	7101188	529507.PMI2985	529507.PMI0401	0.065	0	0	0	0.102	0.341	0	0.075	0.419
PMI2902	fabB	7103618	7102539	529507.PMI2902	529507.PMI1795	0.375	0.128	0.761	0	0.877	0.431	0.951	0.109	0.999
fabF	fabD	7101635	7101632	529507.PMI0863	529507.PMI0860	0.61	0.85	0.767	0	0.877	0.431	0.965	0.703	0.999
fabB	fabD	7102539	7101632	529507.PMI1795	529507.PMI0860	0.375	0.608	0.723	0	0.877	0.431	0.965	0.703	0.999
PMI2902	fabF	7103618	7101635	529507.PMI2902	529507.PMI0863	0.375	0.276	0.776	0	0.877	0.431	0.951	0.109	0.999
fabD	fabH	7101632	7101631	529507.PMI0860	529507.PMI0859	0.86	0.717	0.737	0	0.661	0	0.965	0.783	0.999
fabF	fabH	7101635	7101631	529507.PMI0863	529507.PMI0859	0.596	0	0.719	0	0.661	0	0.955	0.771	0.999
fabB	fabH	7102539	7101631	529507.PMI1795	529507.PMI0859	0.377	0	0.327	0	0.661	0	0.955	0.783	0.998
fabG	fabH	7101633	7101631	529507.PMI0861	529507.PMI0859	0.859	0	0.632	0	0.134	0	0.9	0.476	0.997
PMI2902	fabH	7103618	7101631	529507.PMI2902	529507.PMI0859	0.343	0	0.671	0	0.661	0	0.952	0.109	0.996
fabF	fabG	7101635	7101633	529507.PMI0863	529507.PMI0861	0.615	0	0.729	0	0.132	0.119	0.9	0.579	0.995
fabG	fabD	7101633	7101632	529507.PMI0861	529507.PMI0860	0.901	0	0.74	0	0.494	0	0	0.564	0.993
fabZ	fabG	7103007	7101633	529507.PMI2274	529507.PMI0861	0.381	0	0.538	0	0.103	0.461	0.9	0.581	0.992
fabI	fabF	7102129	7101635	529507.PMI1383	529507.PMI0863	0.381	0	0.17	0	0.483	0.119	0.9	0.731	0.992
fabB	fabI	7102539	7102129	529507.PMI1795	529507.PMI1383	0.381	0.001	0	0	0.483	0.119	0.9	0.732	0.991
fabB	fabG	7102539	7101633	529507.PMI1795	529507.PMI0861	0.38	0	0.597	0	0.132	0.119	0.9	0.579	0.99
fabZ	fabA	7103007	7101559	529507.PMI2274	529507.PMI0782	0.074	0	0	0	0.13	0	0.9	0.842	0.985
fabI	fabA	7102129	7101559	529507.PMI1383	529507.PMI0782	0.381	0	0	0	0.152	0	0.9	0.721	0.983
fabZ	fabI	7103007	7102129	529507.PMI2274	529507.PMI1383	0.381	0	0	0	0.152	0	0.9	0.717	0.983
fabF	acpP	7101635	7101634	529507.PMI0863	529507.PMI0862	0.762	0	0.323	0	0.12	0.529	0.406	0.651	0.982
acpP	fabD	7101634	7101632	529507.PMI0862	529507.PMI0860	0.686	0	0.256	0	0.185	0.175	0.507	0.75	0.976
fabB	fabA	7102539	7101559	529507.PMI1795	529507.PMI0782	0.381	0.116	0.773	0	0.155	0.122	0.068	0.782	0.975
fabZ	fabF	7103007	7101635	529507.PMI2274	529507.PMI0863	0.381	0	0.745	0	0.155	0.12	0.068	0.819	0.975
fabG	fabA	7101633	7101559	529507.PMI0861	529507.PMI0782	0.381	0	0	0	0.066	0.398	0.9	0.387	0.974
fabZ	fabH	7103007	7101631	529507.PMI2274	529507.PMI0859	0.381	0	0.762	0	0.156	0.119	0	0.79	0.972
fabZ	fabB	7103007	7102539	529507.PMI2274	529507.PMI1795	0.381	0	0.585	0	0.155	0.12	0.068	0.802	0.956
fabZ	acpP	7103007	7101634	529507.PMI2274	529507.PMI0862	0.381	0	0.168	0	0.068	0.707	0	0.74	0.956
fabZ	fabD	7103007	7101632	529507.PMI2274	529507.PMI0860	0.381	0	0.717	0	0.214	0.119	0	0.694	0.956
PMI3202	fabF	7103903	7101635	529507.PMI3202	529507.PMI0863	0	0	0.499	0	0	0	0.9	0	0.947
acpP	fabH	7101634	7101631	529507.PMI0862	529507.PMI0859	0.661	0	0.16	0	0.123	0.124	0.406	0.663	0.946
fabB	acpP	7102539	7101634	529507.PMI1795	529507.PMI0862	0.377	0	0.179	0	0.12	0.529	0.406	0.651	0.945
acpP	fabA	7101634	7101559	529507.PMI0862	529507.PMI0782	0.371	0	0	0	0.068	0.728	0	0.676	0.941
PMI3202	fabB	7103903	7102539	529507.PMI3202	529507.PMI1795	0	0.001	0.313	0	0	0	0.9	0	0.928
fabB	fabF	7102539	7101635	529507.PMI1795	529507.PMI0863	0	0	0.761	0.813	0	0	0.9	0.423	0.92
acpP	fabG	7101634	7101633	529507.PMI0862	529507.PMI0861	0.691	0	0.239	0	0.103	0.124	0.507	0.238	0.914
PMI3202	fabZ	7103903	7103007	529507.PMI3202	529507.PMI2274	0	0	0.173	0	0	0	0.9	0	0.913
fabF	fabA	7101635	7101559	529507.PMI0863	529507.PMI0782	0.381	0.127	0	0	0.155	0.122	0.068	0.807	0.911
PMI3202	fabH	7103903	7101631	529507.PMI3202	529507.PMI0859	0	0	0.151	0	0	0	0.9	0	0.911
PMI2902	fabG	7103618	7101633	529507.PMI2902	529507.PMI0861	0.37	0	0.74	0	0.467	0	0	0.109	0.911
fabI	fabH	7102129	7101631	529507.PMI1383	529507.PMI0859	0.381	0	0.255	0	0.29	0.119	0	0.711	0.901
PMI3202	fabA	7103903	7101559	529507.PMI3202	529507.PMI0782	0	0	0	0	0	0	0.9	0	0.9
fabH	fabA	7101631	7101559	529507.PMI0859	529507.PMI0782	0.381	0	0	0	0.156	0.119	0	0.802	0.897
PMI2902	fabZ	7103618	7103007	529507.PMI2902	529507.PMI2274	0.375	0	0.762	0	0.214	0.119	0	0.109	0.891
fabD	fabA	7101632	7101559	529507.PMI0860	529507.PMI0782	0.375	0.182	0	0	0.214	0.12	0	0.731	0.887
fabI	fabD	7102129	7101632	529507.PMI1383	529507.PMI0860	0.381	0	0	0	0.346	0	0	0.657	0.849
PMI2902	fabD	7103618	7101632	529507.PMI2902	529507.PMI0860	0	0	0.778	0.69	0	0	0.8	0	0.847
PMI3202	fabG	7103903	7101633	529507.PMI3202	529507.PMI0861	0	0	0.777	0.83	0	0	0.8	0	0.826
PMI2902	acpP	7103618	7101634	529507.PMI2902	529507.PMI0862	0.372	0	0.208	0	0.185	0.175	0.392	0.109	0.776
fabI	fabG	7102129	7101633	529507.PMI1383	529507.PMI0861	0.381	0	0.155	0	0.063	0	0	0.562	0.756
fabI	acpP	7102129	7101634	529507.PMI1383	529507.PMI0862	0.071	0	0	0	0.101	0.215	0	0.643	0.734
PMI2902	fabI	7103618	7102129	529507.PMI2902	529507.PMI1383	0.381	0	0	0	0.346	0	0	0.109	0.607
PMI2902	fabA	7103618	7101559	529507.PMI2902	529507.PMI0782	0.375	0	0	0	0.214	0.119	0	0.109	0.562
PMI3202	PMI2902	7103903	7103618	529507.PMI3202	529507.PMI2902	0	0	0.419	0	0	0	0	0	0.419
guaB	guaA	7102292	7102291	529507.PMI1546	529507.PMI1545	0.791	0.513	0.633	0	0.999	0.945	0.974	0.794	0.999
purH	guaB	7103484	7102292	529507.PMI2768	529507.PMI1546	0.434	0	0	0	0.602	0.236	0.974	0.495	0.997
purA	purH	7104069	7103484	529507.PMI3370	529507.PMI2768	0.356	0	0.261	0	0.587	0.122	0.965	0.643	0.997
guaA	apt	7102291	7100937	529507.PMI1545	529507.PMI0138	0.348	0	0	0	0.661	0.441	0.9	0.495	0.992
purA	guaB	7104069	7102292	529507.PMI3370	529507.PMI1546	0.432	0	0.297	0	0.481	0	0.9	0.567	0.989
gmk	guaA	7103578	7102291	529507.PMI2862	529507.PMI1545	0	0	0	0	0.224	0	0.974	0.489	0.988
guaB	hpt	7102292	7100959	529507.PMI1546	529507.PMI0160	0.06	0	0	0	0.133	0	0.974	0.452	0.986
purA	hpt	7104069	7100959	529507.PMI3370	529507.PMI0160	0.381	0	0	0	0.133	0	0.956	0.186	0.978
guaA	hpt	7102291	7100959	529507.PMI1545	529507.PMI0160	0.478	0	0	0	0.225	0	0.9	0.49	0.976
gmk	hpt	7103578	7100959	529507.PMI2862	529507.PMI0160	0.043	0	0.227	0	0.047	0	0.956	0.209	0.971
deoD	apt	7103146	7100937	529507.PMI2413	529507.PMI0138	0.064	0	0	0	0	0	0.965	0.121	0.969
deoD	hpt	7103146	7100959	529507.PMI2413	529507.PMI0160	0.045	0	0	0	0	0	0.965	0.045	0.966
adk	apt	7102918	7100937	529507.PMI2184	529507.PMI0138	0.061	0	0	0	0.084	0	0.956	0.208	0.966
gmk	apt	7103578	7100937	529507.PMI2862	529507.PMI0138	0.077	0	0	0	0.118	0	0.951	0.211	0.964
purA	guaA	7104069	7102291	529507.PMI3370	529507.PMI1545	0.478	0	0.66	0	0.566	0	0	0.495	0.955
purH	guaA	7103484	7102291	529507.PMI2768	529507.PMI1545	0.478	0	0	0	0.824	0	0	0.493	0.949
purA	gsk	7104069	7102915	529507.PMI3370	529507.PMI2181	0.073	0	0	0	0.061	0.382	0.9	0.072	0.94
gsk	guaA	7102915	7102291	529507.PMI2181	529507.PMI1545	0.067	0	0	0	0.068	0.17	0.9	0.162	0.928
guaB	apt	7102292	7100937	529507.PMI1546	529507.PMI0138	0.067	0	0	0	0.353	0.177	0.752	0.495	0.926
purH	apt	7103484	7100937	529507.PMI2768	529507.PMI0138	0.076	0	0	0	0.085	0	0.9	0.211	0.924
purH	gsk	7103484	7102915	529507.PMI2768	529507.PMI2181	0.042	0	0	0	0.07	0.215	0.9	0.083	0.924
hpt	apt	7100959	7100937	529507.PMI0160	529507.PMI0138	0.075	0	0	0	0.087	0.215	0.8	0.48	0.918
gsk	guaB	7102915	7102292	529507.PMI2181	529507.PMI1546	0.06	0	0	0	0.062	0.121	0.9	0.113	0.918
gsk	apt	7102915	7100937	529507.PMI2181	529507.PMI0138	0	0	0	0	0.085	0.128	0.9	0.072	0.916
gmk	mazG	7103578	7101014	529507.PMI2862	529507.PMI0218	0.05	0	0	0	0.06	0	0.9	0.166	0.915
purA	mazG	7104069	7101014	529507.PMI3370	529507.PMI0218	0	0	0.192	0	0	0	0.9	0	0.915
purH	hpt	7103484	7100959	529507.PMI2768	529507.PMI0160	0.09	0	0	0	0.066	0	0.9	0.12	0.915
gmk	gsk	7103578	7102915	529507.PMI2862	529507.PMI2181	0	0	0	0	0.06	0.124	0.9	0.075	0.913
purH	mazG	7103484	7101014	529507.PMI2768	529507.PMI0218	0.058	0	0	0	0	0	0.9	0.127	0.91
deoD	gsk	7103146	7102915	529507.PMI2413	529507.PMI2181	0	0	0	0	0	0	0.9	0.137	0.91
mazG	hpt	7101014	7100959	529507.PMI0218	529507.PMI0160	0.063	0	0	0	0	0	0.9	0.113	0.909
gsk	hpt	7102915	7100959	529507.PMI2181	529507.PMI0160	0	0	0	0	0.08	0	0.9	0.075	0.907
adk	mazG	7102918	7101014	529507.PMI2184	529507.PMI0218	0.102	0	0	0	0	0	0.9	0	0.906
adk	hpt	7102918	7100959	529507.PMI2184	529507.PMI0160	0.381	0.764	0	0	0.096	0	0.25	0.189	0.905
gsk	mazG	7102915	7101014	529507.PMI2181	529507.PMI0218	0.051	0	0	0	0.062	0	0.9	0	0.903
guaA	mazG	7102291	7101014	529507.PMI1545	529507.PMI0218	0.064	0	0	0	0.056	0	0.9	0	0.903
mazG	apt	7101014	7100937	529507.PMI0218	529507.PMI0138	0.068	0	0	0	0.043	0	0.9	0	0.903
guaB	mazG	7102292	7101014	529507.PMI1546	529507.PMI0218	0.044	0	0	0	0	0	0.9	0	0.9
gmk	adk	7103578	7102918	529507.PMI2862	529507.PMI2184	0	0.008	0	0	0.102	0	0.584	0.578	0.828
purA	apt	7104069	7100937	529507.PMI3370	529507.PMI0138	0	0	0	0	0.074	0.409	0.392	0.279	0.727
adk	guaA	7102918	7102291	529507.PMI2184	529507.PMI1545	0	0	0	0	0.162	0	0	0.489	0.553
purA	adk	7104069	7102918	529507.PMI3370	529507.PMI2184	0.055	0	0	0	0.128	0	0	0.477	0.532
adk	guaB	7102918	7102292	529507.PMI2184	529507.PMI1546	0	0	0	0	0.097	0	0	0.48	0.51
gmk	guaB	7103578	7102292	529507.PMI2862	529507.PMI1546	0	0	0	0	0.079	0	0	0.484	0.504
cysJ	cysI	7102983	7102982	529507.PMI2250	529507.PMI2249	0.89	0.233	0.778	0	0.837	0.494	0.931	0.811	0.999
metE	metB	7104221	7103923	529507.PMI3529	529507.PMI3223	0.302	0	0	0	0.129	0	0.965	0.807	0.995
metH	PMI2726	7103474	7103442	529507.PMI2758	529507.PMI2726	0.46	0	0	0	0	0	0.974	0.451	0.991
metB	PMI0235	7103923	7101031	529507.PMI3223	529507.PMI0235	0.381	0.008	0.31	0	0.118	0.215	0.963	0.278	0.99
metH	PMI0028	7103474	7100830	529507.PMI2758	529507.PMI0028	0.303	0	0	0	0.063	0	0.974	0.495	0.99
metH	PMI0626	7103474	7101410	529507.PMI2758	529507.PMI0626	0.303	0	0	0	0.063	0	0.974	0.495	0.99
metB	metH	7103923	7103474	529507.PMI3223	529507.PMI2758	0.303	0	0	0	0.063	0	0.974	0.495	0.99
metE	PMI0028	7104221	7100830	529507.PMI3529	529507.PMI0028	0.302	0	0	0	0.128	0	0.965	0.454	0.987
metE	PMI0626	7104221	7101410	529507.PMI3529	529507.PMI0626	0.302	0	0	0	0.128	0	0.965	0.454	0.987
metB	PMI1275	7103923	7102021	529507.PMI3223	529507.PMI1275	0.381	0	0	0	0	0	0.965	0.177	0.981
metE	metH	7104221	7103474	529507.PMI3529	529507.PMI2758	0.386	0	0	0	0.1	0	0.894	0.682	0.979
metB	PMI0626	7103923	7101410	529507.PMI3223	529507.PMI0626	0	0	0.778	0.721	0.083	0	0.965	0.639	0.978
metB	PMI0028	7103923	7100830	529507.PMI3223	529507.PMI0028	0	0	0.778	0.72	0.083	0	0.965	0.638	0.978
metH	PMI0235	7103474	7101031	529507.PMI2758	529507.PMI0235	0.059	0	0	0	0.065	0	0.955	0.486	0.977
metH	PMI1275	7103474	7102021	529507.PMI2758	529507.PMI1275	0	0	0	0	0	0	0.974	0.098	0.975
PMI2726	PMI0235	7103442	7101031	529507.PMI2726	529507.PMI0235	0.381	0.003	0	0	0.062	0	0.956	0.147	0.975
metE	PMI2726	7104221	7103442	529507.PMI3529	529507.PMI2726	0.133	0	0	0	0.149	0	0.965	0.12	0.974
PMI2726	cysI	7103442	7102982	529507.PMI2726	529507.PMI2249	0.091	0	0	0	0.157	0	0.965	0.109	0.973
metB	cysI	7103923	7102982	529507.PMI3223	529507.PMI2249	0.063	0	0	0	0.081	0.122	0.956	0.293	0.972
PMI2726	PMI0028	7103442	7100830	529507.PMI2726	529507.PMI0028	0.117	0	0.704	0.677	0.084	0	0.956	0.177	0.971
PMI2726	PMI0626	7103442	7101410	529507.PMI2726	529507.PMI0626	0.117	0	0.736	0.683	0.084	0	0.956	0.177	0.971
PMI2726	cysJ	7103442	7102983	529507.PMI2726	529507.PMI2250	0.043	0	0	0	0.201	0	0.965	0	0.971
metB	PMI2726	7103923	7103442	529507.PMI3223	529507.PMI2726	0.117	0	0.775	0.796	0.064	0	0.956	0.231	0.968
metE	PMI1275	7104221	7102021	529507.PMI3529	529507.PMI1275	0.061	0	0	0	0	0	0.965	0.071	0.967
cysJ	PMI0794	7102983	7101571	529507.PMI2250	529507.PMI0794	0	0	0	0	0	0	0.965	0	0.965
cysI	PMI0794	7102982	7101571	529507.PMI2249	529507.PMI0794	0	0	0	0	0	0	0.965	0	0.965
PMI2726	PMI1275	7103442	7102021	529507.PMI2726	529507.PMI1275	0.064	0	0.151	0	0	0	0.956	0.061	0.963
metB	cysJ	7103923	7102983	529507.PMI3223	529507.PMI2250	0.043	0	0	0	0.076	0	0.956	0.069	0.959
metE	PMI0235	7104221	7101031	529507.PMI3529	529507.PMI0235	0	0	0	0	0.063	0	0.952	0.142	0.958
PMI2726	PMI0794	7103442	7101571	529507.PMI2726	529507.PMI0794	0	0	0	0	0	0	0.956	0	0.956
PMI1275	PMI0626	7102021	7101410	529507.PMI1275	529507.PMI0626	0.381	0	0	0	0	0	0.912	0.177	0.951
PMI1275	PMI0028	7102021	7100830	529507.PMI1275	529507.PMI0028	0.381	0	0	0	0	0	0.912	0.177	0.951
PMI0626	PMI0235	7101410	7101031	529507.PMI0626	529507.PMI0235	0.381	0.006	0.208	0	0.118	0.215	0.581	0.211	0.861
PMI0235	PMI0028	7101031	7100830	529507.PMI0235	529507.PMI0028	0.381	0.003	0.169	0	0.118	0.215	0.581	0.211	0.854
cysI	PMI0235	7102982	7101031	529507.PMI2249	529507.PMI0235	0.304	0	0	0	0.228	0	0.584	0.368	0.839
metH	cysJ	7103474	7102983	529507.PMI2758	529507.PMI2250	0	0	0	0	0.065	0.215	0.752	0.171	0.828
PMI0626	PMI0028	7101410	7100830	529507.PMI0626	529507.PMI0028	0	0	0.778	0.879	0	0	0.8	0	0.818
cysI	PMI0028	7102982	7100830	529507.PMI2249	529507.PMI0028	0.063	0	0	0	0.081	0.122	0.581	0.422	0.783
cysI	PMI0626	7102982	7101410	529507.PMI2249	529507.PMI0626	0.063	0	0	0	0.081	0.122	0.581	0.422	0.783
cysJ	PMI0235	7102983	7101031	529507.PMI2250	529507.PMI0235	0.092	0	0	0	0.225	0.125	0.584	0.129	0.736
cysJ	PMI0626	7102983	7101410	529507.PMI2250	529507.PMI0626	0.043	0	0	0	0.076	0	0.581	0.227	0.675
cysJ	PMI0028	7102983	7100830	529507.PMI2250	529507.PMI0028	0.043	0	0	0	0.076	0	0.581	0.227	0.675
metE	cysI	7104221	7102982	529507.PMI3529	529507.PMI2249	0	0	0	0	0.576	0	0	0.147	0.622
metE	cysJ	7104221	7102983	529507.PMI3529	529507.PMI2250	0	0	0	0	0.457	0	0	0.07	0.473
dnaN	dnaQ	7103838	7101024	529507.PMI3133	529507.PMI0228	0.381	0	0.515	0	0	0.945	0.519	0.633	0.996
dnaN	polA	7103838	7103542	529507.PMI3133	529507.PMI2826	0	0	0.43	0	0.606	0.868	0.539	0.6	0.993
dnaN	dnaX	7103838	7100938	529507.PMI3133	529507.PMI0139	0.059	0	0	0	0.087	0.945	0.581	0.699	0.992
dnaQ	dnaX	7101024	7100938	529507.PMI0228	529507.PMI0139	0	0	0	0	0.06	0.877	0.519	0.796	0.987
polA	pykA	7103542	7101903	529507.PMI2826	529507.PMI1155	0.434	0	0	0	0.063	0	0.9	0.588	0.975
polA	pykF	7103542	7102151	529507.PMI2826	529507.PMI1405	0.434	0	0	0	0.063	0	0.9	0.598	0.975
polA	PMI2409	7103542	7103142	529507.PMI2826	529507.PMI2409	0.434	0	0	0	0.063	0	0.9	0.572	0.974
holD	dnaX	7103229	7100938	529507.PMI2495	529507.PMI0139	0	0	0.385	0	0.063	0.945	0	0.075	0.966
pykA	dnaX	7101903	7100938	529507.PMI1155	529507.PMI0139	0.381	0	0	0	0	0	0.9	0.13	0.941
pykF	dnaX	7102151	7100938	529507.PMI1405	529507.PMI0139	0.381	0	0	0	0	0	0.9	0.13	0.941
PMI2409	dnaX	7103142	7100938	529507.PMI2409	529507.PMI0139	0.381	0	0	0	0	0	0.9	0.113	0.94
dnaQ	dgt	7101024	7101011	529507.PMI0228	529507.PMI0215	0	0	0	0	0	0	0.9	0.369	0.934
dnaN	pykA	7103838	7101903	529507.PMI3133	529507.PMI1155	0.146	0	0	0	0.063	0	0.9	0.127	0.92
dnaN	pykF	7103838	7102151	529507.PMI3133	529507.PMI1405	0.146	0	0	0	0.063	0	0.9	0.127	0.92
dnaN	PMI2409	7103838	7103142	529507.PMI3133	529507.PMI2409	0.146	0	0	0	0.063	0	0.9	0.127	0.92
holD	dgt	7103229	7101011	529507.PMI2495	529507.PMI0215	0	0	0.199	0	0	0	0.9	0	0.916
PMI2409	dnaQ	7103142	7101024	529507.PMI2409	529507.PMI0228	0	0	0	0	0.084	0	0.9	0.11	0.911
pykA	dnaQ	7101903	7101024	529507.PMI1155	529507.PMI0228	0	0	0	0	0.084	0	0.9	0.11	0.911
pykF	dnaQ	7102151	7101024	529507.PMI1405	529507.PMI0228	0	0	0	0	0.084	0	0.9	0.11	0.911
holE1	dgt	7101323	7101011	529507.PMI0538	529507.PMI0215	0	0	0.15	0	0	0	0.9	0	0.911
surE	dgt	7102972	7101011	529507.PMI2239	529507.PMI0215	0.065	0	0	0	0.063	0	0.9	0	0.904
PMI2409	dgt	7103142	7101011	529507.PMI2409	529507.PMI0215	0	0	0	0	0	0	0.9	0.067	0.902
dnaN	dgt	7103838	7101011	529507.PMI3133	529507.PMI0215	0	0	0	0	0.062	0	0.9	0	0.902
polA	dgt	7103542	7101011	529507.PMI2826	529507.PMI0215	0	0	0	0	0	0	0.9	0.063	0.902
pykF	dgt	7102151	7101011	529507.PMI1405	529507.PMI0215	0	0	0	0	0	0	0.9	0.067	0.902
pykA	dgt	7101903	7101011	529507.PMI1155	529507.PMI0215	0	0	0	0	0	0	0.9	0.067	0.902
dgt	dnaX	7101011	7100938	529507.PMI0215	529507.PMI0139	0	0	0	0	0.06	0	0.9	0	0.901
pykA	holE1	7101903	7101323	529507.PMI1155	529507.PMI0538	0	0	0	0	0	0	0.9	0	0.9
holD	pykA	7103229	7101903	529507.PMI2495	529507.PMI1155	0	0	0	0	0	0	0.9	0	0.9
holD	pykF	7103229	7102151	529507.PMI2495	529507.PMI1405	0	0	0	0	0	0	0.9	0	0.9
pykF	holE1	7102151	7101323	529507.PMI1405	529507.PMI0538	0	0	0	0	0	0	0.9	0	0.9
holD	PMI2409	7103229	7103142	529507.PMI2495	529507.PMI2409	0	0	0	0	0	0	0.9	0	0.9
PMI2409	holE1	7103142	7101323	529507.PMI2409	529507.PMI0538	0	0	0	0	0	0	0.9	0	0.9
PMI2409	pykF	7103142	7102151	529507.PMI2409	529507.PMI1405	0	0	0.778	0.814	0	0	0.8	0	0.828
pykF	pykA	7102151	7101903	529507.PMI1405	529507.PMI1155	0	0	0.778	0.826	0	0	0.8	0.074	0.827
PMI2409	pykA	7103142	7101903	529507.PMI2409	529507.PMI1155	0	0	0.778	0.924	0	0	0.8	0	0.811
dnaN	holD	7103838	7103229	529507.PMI3133	529507.PMI2495	0	0	0	0	0	0.702	0	0.065	0.709
polA	dnaX	7103542	7100938	529507.PMI2826	529507.PMI0139	0.095	0	0	0	0.097	0	0	0.666	0.703
polA	dnaQ	7103542	7101024	529507.PMI2826	529507.PMI0228	0.059	0	0	0	0.129	0.128	0	0.486	0.583
polA	surE	7103542	7102972	529507.PMI2826	529507.PMI2239	0.045	0	0	0	0.072	0	0	0.494	0.512
proC	PMI0333	7101123	7101121	529507.PMI0335	529507.PMI0333	0.841	0	0.465	0	0.102	0	0	0	0.917
PMI0336	proC	7101124	7101123	529507.PMI0336	529507.PMI0335	0.854	0	0.272	0	0.125	0	0	0.111	0.906
PMI0336	PMI0333	7101124	7101121	529507.PMI0336	529507.PMI0333	0.804	0	0.527	0	0.063	0	0	0	0.905
PMI0333	yggW	7101121	7101120	529507.PMI0333	529507.PMI0332	0.89	0	0	0	0.085	0	0	0.118	0.903
PMI0334	yggW	7101122	7101120	529507.PMI0334	529507.PMI0332	0.878	0	0	0	0.063	0	0	0.137	0.893
PMI0334	PMI0333	7101122	7101121	529507.PMI0334	529507.PMI0333	0.878	0	0	0	0.061	0	0	0.127	0.892
proC	PMI0334	7101123	7101122	529507.PMI0335	529507.PMI0334	0.854	0	0	0	0.061	0	0	0	0.857
proC	yggW	7101123	7101120	529507.PMI0335	529507.PMI0332	0.841	0	0	0	0	0	0	0	0.842
PMI0336	PMI0334	7101124	7101122	529507.PMI0336	529507.PMI0334	0.815	0	0	0	0.096	0	0	0.109	0.839
PMI0336	yggW	7101124	7101120	529507.PMI0336	529507.PMI0332	0.804	0	0	0	0.063	0	0	0	0.809
avtA	PMI1765	7103568	7102510	529507.PMI2852	529507.PMI1765	0	0	0	0	0.065	0	0.8	0.053	0.807
yqgF	PMI0336	7101126	7101124	529507.PMI0338	529507.PMI0336	0.376	0	0	0	0	0	0	0.636	0.763
PMI0337	PMI0336	7101125	7101124	529507.PMI0337	529507.PMI0336	0.758	0	0	0	0	0	0	0	0.758
PMI0336	mtnN	7101124	7101010	529507.PMI0336	529507.PMI0214	0.169	0.703	0	0	0	0	0	0	0.743
PMI0337	proC	7101125	7101123	529507.PMI0337	529507.PMI0335	0.729	0	0	0	0	0	0	0.045	0.73
PMI1765	PMI0336	7102510	7101124	529507.PMI1765	529507.PMI0336	0.059	0	0.155	0	0.062	0	0.65	0	0.704
PMI0337	PMI0334	7101125	7101122	529507.PMI0337	529507.PMI0334	0.702	0	0	0	0	0	0	0	0.703
avtA	PMI0336	7103568	7101124	529507.PMI2852	529507.PMI0336	0	0	0	0	0.066	0	0.673	0	0.681
PMI0337	yggW	7101125	7101120	529507.PMI0337	529507.PMI0332	0.669	0	0	0	0	0	0	0	0.67
PMI0337	PMI0333	7101125	7101121	529507.PMI0337	529507.PMI0333	0.664	0	0	0	0	0	0	0	0.664
iscS	PMI0336	7102602	7101124	529507.PMI1860	529507.PMI0336	0.046	0	0	0	0	0	0.65	0	0.651
iscS	PMI1765	7102602	7102510	529507.PMI1860	529507.PMI1765	0.057	0	0	0	0	0.177	0.534	0.129	0.642
purL	purC	7102617	7102308	529507.PMI1875	529507.PMI1562	0.478	0	0	0	0.998	0.429	0	0.602	0.999
purE	purC	7102895	7102308	529507.PMI2161	529507.PMI1562	0.381	0.738	0.648	0	0.48	0	0.965	0.489	0.999
purL	guaA	7102617	7102291	529507.PMI1875	529507.PMI1545	0.479	0	0	0	0.999	0	0	0.786	0.999
purL	purN	7102617	7102322	529507.PMI1875	529507.PMI1576	0.478	0	0.35	0	0.904	0.86	0.974	0.572	0.999
purE	purL	7102895	7102617	529507.PMI2161	529507.PMI1875	0.478	0	0.269	0	0.842	0.839	0.752	0.495	0.998
PMI2226	nagE	7102959	7101242	529507.PMI2226	529507.PMI0455	0.479	0	0.734	0.612	0.28	0.945	0.752	0.786	0.997
guaA	apt	7102291	7100937	529507.PMI1545	529507.PMI0138	0.348	0	0	0	0.661	0.441	0.9	0.495	0.992
purE	purN	7102895	7102322	529507.PMI2161	529507.PMI1576	0.381	0	0.482	0	0.661	0.461	0.538	0.58	0.985
purE	guaA	7102895	7102291	529507.PMI2161	529507.PMI1545	0.478	0	0.305	0	0.924	0	0	0.451	0.982
purN	purC	7102322	7102308	529507.PMI1576	529507.PMI1562	0.381	0	0.167	0	0.608	0.215	0.538	0.462	0.951
purC	guaA	7102308	7102291	529507.PMI1562	529507.PMI1545	0.478	0	0	0	0.818	0	0	0.495	0.947
purN	guaA	7102322	7102291	529507.PMI1576	529507.PMI1545	0.478	0	0.23	0	0.384	0	0	0.495	0.858
guaA	nagE	7102291	7101242	529507.PMI1545	529507.PMI0455	0	0	0	0	0	0	0	0.786	0.786
PMI2226	guaA	7102959	7102291	529507.PMI2226	529507.PMI1545	0	0	0	0	0	0	0	0.786	0.786
PMI3524	guaA	7104216	7102291	529507.PMI3524	529507.PMI1545	0.478	0	0	0	0.462	0	0	0.06	0.712
PMI3524	purN	7104216	7102322	529507.PMI3524	529507.PMI1576	0.347	0	0	0	0.063	0	0.495	0.075	0.675
PMI2226	purL	7102959	7102617	529507.PMI2226	529507.PMI1875	0	0	0	0	0	0	0	0.638	0.638
purL	nagE	7102617	7101242	529507.PMI1875	529507.PMI0455	0	0	0	0	0	0	0	0.638	0.638
PMI3524	purL	7104216	7102617	529507.PMI3524	529507.PMI1875	0.414	0	0	0	0.249	0	0	0.163	0.599
PMI3524	PMI2226	7104216	7102959	529507.PMI3524	529507.PMI2226	0	0	0	0	0	0	0	0.59	0.59
PMI3524	nagE	7104216	7101242	529507.PMI3524	529507.PMI0455	0	0	0	0	0	0	0	0.59	0.59
PMI3525	PMI3524	7104217	7104216	529507.PMI3525	529507.PMI3524	0.563	0	0	0	0	0	0	0.061	0.572
mtnN	apt	7101010	7100937	529507.PMI0214	529507.PMI0138	0.381	0	0.198	0	0	0	0.118	0.114	0.56
PMI3524	mtnN	7104216	7101010	529507.PMI3524	529507.PMI0214	0.131	0	0	0	0	0	0.495	0	0.542
purL	apt	7102617	7100937	529507.PMI1875	529507.PMI0138	0.099	0	0	0	0.063	0	0	0.484	0.526
PMI3524	purE	7104216	7102895	529507.PMI3524	529507.PMI2161	0.381	0	0	0	0.098	0	0	0.075	0.438
PMI3524	apt	7104216	7100937	529507.PMI3524	529507.PMI0138	0.381	0	0	0	0	0	0	0.124	0.434
PMI3524	purC	7104216	7102308	529507.PMI3524	529507.PMI1562	0.381	0	0	0	0	0	0	0.124	0.434
purL	mtnN	7102617	7101010	529507.PMI1875	529507.PMI0214	0.377	0	0	0	0	0	0	0.124	0.43
PMI2261	metN	7102994	7102992	529507.PMI2261	529507.PMI2259	0.736	0	0.778	0	0.284	0.816	0.931	0.233	0.999
metI	metN	7102993	7102992	529507.PMI2260	529507.PMI2259	0.89	0	0.778	0	0.608	0.945	0.931	0.38	0.999
PMI2261	metI	7102994	7102993	529507.PMI2261	529507.PMI2260	0.736	0.385	0.778	0	0.496	0	0.931	0.211	0.998
PMI2263	rcsF	7102996	7102995	529507.PMI2263	529507.PMI2262	0.862	0	0	0	0.065	0	0	0	0.865
PMI2263	PMI2261	7102996	7102994	529507.PMI2263	529507.PMI2261	0.562	0	0	0	0	0	0	0.14	0.607
proS	PMI2263	7102997	7102996	529507.PMI2264	529507.PMI2263	0.557	0	0	0	0.084	0	0	0.075	0.592
PMI2263	mtnN	7102996	7101010	529507.PMI2263	529507.PMI0214	0.051	0	0	0	0	0	0.579	0	0.583
rcsF	PMI2261	7102995	7102994	529507.PMI2262	529507.PMI2261	0.562	0	0	0	0	0	0	0	0.562
PMI2263	amn	7102996	7101967	529507.PMI2263	529507.PMI1220	0.051	0	0	0	0	0	0.535	0	0.539
proS	rcsF	7102997	7102995	529507.PMI2264	529507.PMI2262	0.517	0	0	0	0.063	0	0	0	0.528
PMI2263	metN	7102996	7102992	529507.PMI2263	529507.PMI2259	0.404	0	0	0	0	0	0	0.111	0.448
PMI2263	metI	7102996	7102993	529507.PMI2263	529507.PMI2260	0.405	0	0	0	0	0	0	0.075	0.427
rcsF	metI	7102995	7102993	529507.PMI2262	529507.PMI2260	0.403	0	0	0	0.061	0	0	0	0.416
rcsF	metN	7102995	7102992	529507.PMI2262	529507.PMI2259	0.403	0	0	0	0	0	0	0	0.403

## Sheet: AIPL
#node1	node2	node1_string_internal_id	node2_string_internal_id	node1_external_id	node2_external_id	neighborhood_on_chromosome	gene_fusion	phylogenetic_cooccurrence	homology	coexpression	experimentally_determined_interaction	database_annotated	automated_textmining	combined_score
mnmC	dadB	7102540	7102254	529507.PMI1796	529507.PMI1508	0.371	0	0	0	0.226	0	0.733	0.109	0.868
mnmC	PMI1774	7102540	7102519	529507.PMI1796	529507.PMI1774	0.371	0	0	0	0.226	0	0.733	0.109	0.868
alr	mnmC	7103458	7102540	529507.PMI2742	529507.PMI1796	0.371	0	0	0	0.226	0	0.733	0.109	0.868
alr	PMI1774	7103458	7102519	529507.PMI2742	529507.PMI1774	0	0	0.701	0.63	0	0	0.8	0.109	0.854
PMI1774	dadB	7102519	7102254	529507.PMI1774	529507.PMI1508	0	0	0.707	0.653	0	0	0.8	0.109	0.851
metG	thiI	7101430	7100896	529507.PMI0646	529507.PMI0097	0.272	0	0	0	0.102	0	0	0.768	0.835
mnmC	metG	7102540	7101430	529507.PMI1796	529507.PMI0646	0.047	0	0.206	0	0.063	0	0	0.786	0.827
alr	dadB	7103458	7102254	529507.PMI2742	529507.PMI1508	0	0	0.778	0.876	0	0	0.8	0	0.819
birA	gcvP	7103949	7102757	529507.PMI3249	529507.PMI2019	0	0	0	0	0	0	0	0.815	0.815
birA	mnmC	7103949	7102540	529507.PMI3249	529507.PMI1796	0.054	0	0	0	0.061	0	0	0.786	0.793
fadH	gcvP	7104392	7102757	529507.PMI3702	529507.PMI2019	0.061	0	0	0	0	0	0.752	0.177	0.791
gcvP	mnmC	7102757	7102540	529507.PMI2019	529507.PMI1796	0	0	0	0	0.06	0	0.752	0.122	0.777
mnmC	thiI	7102540	7100896	529507.PMI1796	529507.PMI0097	0.063	0	0	0	0	0	0	0.743	0.748
rlmL	thiI	7101553	7100896	529507.PMI0774	529507.PMI0097	0.373	0	0.195	0	0.41	0	0	0.176	0.721
mnmC	rlmL	7102540	7101553	529507.PMI1796	529507.PMI0774	0.401	0	0	0	0.13	0.438	0	0	0.681
mnmC	fabB	7102540	7102539	529507.PMI1796	529507.PMI1795	0.67	0	0	0	0.062	0	0	0	0.677
fadH	mnmC	7104392	7102540	529507.PMI3702	529507.PMI1796	0.372	0	0	0	0.063	0.448	0	0.12	0.675
fadH	thiI	7104392	7100896	529507.PMI3702	529507.PMI0097	0.416	0	0	0	0.064	0	0	0.404	0.645
birA	fabB	7103949	7102539	529507.PMI3249	529507.PMI1795	0.386	0	0.189	0	0.063	0	0	0.116	0.532
birA	metG	7103949	7101430	529507.PMI3249	529507.PMI0646	0.131	0	0.15	0	0	0.182	0	0.165	0.427
luxS	mtnN	7101166	7101010	529507.PMI0379	529507.PMI0214	0.381	0	0.756	0	0	0	0.965	0.76	0.998
metE	metB	7104221	7103923	529507.PMI3529	529507.PMI3223	0.302	0	0	0	0.129	0	0.965	0.807	0.995
metB	cysK	7103923	7102569	529507.PMI3223	529507.PMI1827	0.381	0.001	0.182	0	0.118	0.215	0.965	0.39	0.991
metH	PMI2726	7103474	7103442	529507.PMI2758	529507.PMI2726	0.46	0	0	0	0	0	0.974	0.451	0.991
metB	PMI0235	7103923	7101031	529507.PMI3223	529507.PMI0235	0.381	0.008	0.31	0	0.118	0.215	0.963	0.278	0.99
metH	PMI0028	7103474	7100830	529507.PMI2758	529507.PMI0028	0.303	0	0	0	0.063	0	0.974	0.495	0.99
metB	metH	7103923	7103474	529507.PMI3223	529507.PMI2758	0.303	0	0	0	0.063	0	0.974	0.495	0.99
metH	PMI0626	7103474	7101410	529507.PMI2758	529507.PMI0626	0.303	0	0	0	0.063	0	0.974	0.495	0.99
metE	PMI0626	7104221	7101410	529507.PMI3529	529507.PMI0626	0.302	0	0	0	0.128	0	0.965	0.454	0.987
metE	PMI0028	7104221	7100830	529507.PMI3529	529507.PMI0028	0.302	0	0	0	0.128	0	0.965	0.454	0.987
metH	luxS	7103474	7101166	529507.PMI2758	529507.PMI0379	0.381	0	0	0	0	0	0.974	0.176	0.985
cysK	PMI0028	7102569	7100830	529507.PMI1827	529507.PMI0028	0.381	0	0.18	0	0.118	0.215	0.956	0.211	0.985
cysK	PMI0626	7102569	7101410	529507.PMI1827	529507.PMI0626	0.381	0.001	0.174	0	0.118	0.215	0.956	0.211	0.984
metB	PMI1275	7103923	7102021	529507.PMI3223	529507.PMI1275	0.381	0	0	0	0	0	0.965	0.177	0.981
metE	metH	7104221	7103474	529507.PMI3529	529507.PMI2758	0.386	0	0	0	0.1	0	0.894	0.682	0.979
metB	PMI0626	7103923	7101410	529507.PMI3223	529507.PMI0626	0	0	0.778	0.721	0.083	0	0.965	0.639	0.978
metE	luxS	7104221	7101166	529507.PMI3529	529507.PMI0379	0.302	0	0	0	0	0	0.965	0.186	0.978
metB	PMI0028	7103923	7100830	529507.PMI3223	529507.PMI0028	0	0	0.778	0.72	0.083	0	0.965	0.638	0.978
metH	PMI0235	7103474	7101031	529507.PMI2758	529507.PMI0235	0.059	0	0	0	0.065	0	0.955	0.486	0.977
PMI2726	PMI0235	7103442	7101031	529507.PMI2726	529507.PMI0235	0.381	0.003	0	0	0.062	0	0.956	0.147	0.975
metH	PMI1275	7103474	7102021	529507.PMI2758	529507.PMI1275	0	0	0	0	0	0	0.974	0.098	0.975
metE	PMI2726	7104221	7103442	529507.PMI3529	529507.PMI2726	0.133	0	0	0	0.149	0	0.965	0.12	0.974
PMI2726	PMI0626	7103442	7101410	529507.PMI2726	529507.PMI0626	0.117	0	0.736	0.683	0.084	0	0.956	0.177	0.971
PMI2726	PMI0028	7103442	7100830	529507.PMI2726	529507.PMI0028	0.117	0	0.704	0.677	0.084	0	0.956	0.177	0.971
metB	PMI2726	7103923	7103442	529507.PMI3223	529507.PMI2726	0.117	0	0.775	0.796	0.064	0	0.956	0.231	0.968
metE	PMI1275	7104221	7102021	529507.PMI3529	529507.PMI1275	0.061	0	0	0	0	0	0.965	0.071	0.967
PMI2726	PMI1275	7103442	7102021	529507.PMI2726	529507.PMI1275	0.064	0	0.151	0	0	0	0.956	0.061	0.963
metE	PMI0235	7104221	7101031	529507.PMI3529	529507.PMI0235	0	0	0	0	0.063	0	0.952	0.142	0.958
metH	cysK	7103474	7102569	529507.PMI2758	529507.PMI1827	0.059	0	0	0	0.065	0	0.911	0.486	0.954
PMI1275	PMI0028	7102021	7100830	529507.PMI1275	529507.PMI0028	0.381	0	0	0	0	0	0.912	0.177	0.951
PMI1275	PMI0626	7102021	7101410	529507.PMI1275	529507.PMI0626	0.381	0	0	0	0	0	0.912	0.177	0.951
PMI2726	cysK	7103442	7102569	529507.PMI2726	529507.PMI1827	0.381	0	0	0	0.062	0	0.912	0.147	0.95
metB	luxS	7103923	7101166	529507.PMI3223	529507.PMI0379	0.381	0	0	0	0	0	0.9	0.224	0.947
PMI0626	luxS	7101410	7101166	529507.PMI0626	529507.PMI0379	0.381	0	0	0	0	0	0.9	0.127	0.941
luxS	PMI0028	7101166	7100830	529507.PMI0379	529507.PMI0028	0.381	0	0	0	0	0	0.9	0.127	0.941
luxS	PMI0235	7101166	7101031	529507.PMI0379	529507.PMI0235	0.322	0	0	0	0	0	0.9	0.21	0.941
cysK	luxS	7102569	7101166	529507.PMI1827	529507.PMI0379	0.322	0	0	0	0	0	0.8	0.476	0.922
cysK	PMI1275	7102569	7102021	529507.PMI1827	529507.PMI1275	0.096	0	0	0	0	0	0.9	0.128	0.914
PMI1275	luxS	7102021	7101166	529507.PMI1275	529507.PMI0379	0.05	0	0	0	0	0	0.9	0.089	0.905
PMI2726	luxS	7103442	7101166	529507.PMI2726	529507.PMI0379	0.043	0	0	0	0	0	0.9	0	0.9
metE	cysK	7104221	7102569	529507.PMI3529	529507.PMI1827	0	0	0	0	0.063	0	0.862	0.19	0.886
PMI0626	PMI0235	7101410	7101031	529507.PMI0626	529507.PMI0235	0.381	0.006	0.208	0	0.118	0.215	0.581	0.211	0.861
PMI0235	PMI0028	7101031	7100830	529507.PMI0235	529507.PMI0028	0.381	0.003	0.169	0	0.118	0.215	0.581	0.211	0.854
cysK	PMI0235	7102569	7101031	529507.PMI1827	529507.PMI0235	0	0	0.775	0.686	0	0	0.8	0	0.848
PMI0626	PMI0028	7101410	7100830	529507.PMI0626	529507.PMI0028	0	0	0.778	0.879	0	0	0.8	0	0.818
cysK	mtnN	7102569	7101010	529507.PMI1827	529507.PMI0214	0.059	0	0	0	0	0	0	0.459	0.469
metB	mtnN	7103923	7101010	529507.PMI3223	529507.PMI0214	0.046	0	0	0	0	0	0	0.459	0.461
luxS	mtnN	7101166	7101010	529507.PMI0379	529507.PMI0214	0.381	0	0.756	0	0	0	0.965	0.76	0.998
hpt	apt	7100959	7100937	529507.PMI0160	529507.PMI0138	0.075	0	0	0	0.087	0.215	0.8	0.48	0.918
PMI2902	fabD	7103618	7101632	529507.PMI2902	529507.PMI0860	0	0	0.778	0.69	0	0	0.8	0	0.847
PMI0336	mtnN	7101124	7101010	529507.PMI0336	529507.PMI0214	0.169	0.703	0	0	0	0	0	0	0.743
mtnN	btuF	7101010	7101009	529507.PMI0214	529507.PMI0213	0.711	0	0	0	0	0	0	0	0.712
dgt	mtnN	7101011	7101010	529507.PMI0215	529507.PMI0214	0.64	0	0	0	0	0	0	0	0.641
PMI2902	mtnN	7103618	7101010	529507.PMI2902	529507.PMI0214	0.381	0	0	0	0.424	0	0	0	0.628
fabD	mtnN	7101632	7101010	529507.PMI0860	529507.PMI0214	0.381	0	0	0	0.424	0	0	0	0.628
PMI2263	mtnN	7102996	7101010	529507.PMI2263	529507.PMI0214	0.051	0	0	0	0	0	0.579	0	0.583
mtnN	hpt	7101010	7100959	529507.PMI0214	529507.PMI0160	0	0	0	0	0.099	0	0.536	0.044	0.565
mtnN	apt	7101010	7100937	529507.PMI0214	529507.PMI0138	0.381	0	0.198	0	0	0	0.118	0.114	0.56
PMI3524	mtnN	7104216	7101010	529507.PMI3524	529507.PMI0214	0.131	0	0	0	0	0	0.495	0	0.542
dgt	btuF	7101011	7101009	529507.PMI0215	529507.PMI0213	0.456	0	0	0	0	0	0	0	0.456
PMI3524	apt	7104216	7100937	529507.PMI3524	529507.PMI0138	0.381	0	0	0	0	0	0	0.124	0.434
metL	thrA	7103924	7100803	529507.PMI3224	529507.PMI0001	0.478	0	0.777	0.691	0.927	0.897	0.947	0.494	0.999
asd	thrA	7103841	7100803	529507.PMI3136	529507.PMI0001	0.478	0	0	0	0.929	0.327	0.974	0.56	0.999
thrB	thrA	7100804	7100803	529507.PMI0002	529507.PMI0001	0.921	0	0.771	0	0.999	0.215	0.974	0.495	0.999
thrC	thrA	7100805	7100803	529507.PMI0003	529507.PMI0001	0.921	0	0.761	0	0.999	0.215	0.392	0.642	0.999
metL	thrB	7103924	7100804	529507.PMI3224	529507.PMI0002	0.464	0	0.564	0	0.999	0.215	0.974	0.495	0.999
thrC	thrB	7100805	7100804	529507.PMI0003	529507.PMI0002	0.89	0.643	0.759	0	0.985	0	0.965	0.785	0.999
metL	thrC	7103924	7100805	529507.PMI3224	529507.PMI0003	0.464	0	0.484	0	0.999	0.215	0.392	0.495	0.999
metL	asd	7103924	7103841	529507.PMI3224	529507.PMI3136	0.478	0	0	0	0.929	0.327	0.974	0.495	0.999
asd	lysC	7103841	7103471	529507.PMI3136	529507.PMI2755	0.381	0	0	0	0.809	0	0.965	0.381	0.997
metL	usg	7103924	7102535	529507.PMI3224	529507.PMI1790	0.478	0	0.16	0	0.929	0.327	0.752	0.495	0.996
usg	thrA	7102535	7100803	529507.PMI1790	529507.PMI0001	0.478	0	0.203	0	0.929	0.327	0.752	0.495	0.996
metL	lysC	7103924	7103471	529507.PMI3224	529507.PMI2755	0.381	0	0.744	0.654	0.701	0.461	0.893	0.412	0.992
asd	dapA	7103841	7102310	529507.PMI3136	529507.PMI1564	0.381	0	0.163	0	0.287	0	0.965	0.472	0.992
metA	thrA	7103481	7100803	529507.PMI2765	529507.PMI0001	0.375	0.003	0.168	0	0.165	0	0.974	0.381	0.991
lysC	thrA	7103471	7100803	529507.PMI2755	529507.PMI0001	0.381	0	0.766	0.709	0.701	0.461	0.893	0.232	0.991
metL	metA	7103924	7103481	529507.PMI3224	529507.PMI2765	0.375	0	0	0	0.165	0	0.974	0.381	0.99
dapA	thrA	7102310	7100803	529507.PMI1564	529507.PMI0001	0.413	0	0.238	0	0.466	0	0.921	0.516	0.989
metL	dapA	7103924	7102310	529507.PMI3224	529507.PMI1564	0.413	0	0.152	0	0.466	0	0.921	0.495	0.987
asd	PMI1233	7103841	7101979	529507.PMI3136	529507.PMI1233	0.381	0	0	0	0.287	0	0.965	0.211	0.986
PMI1233	thrA	7101979	7100803	529507.PMI1233	529507.PMI0001	0.413	0	0	0	0.466	0	0.921	0.495	0.985
metL	PMI1233	7103924	7101979	529507.PMI3224	529507.PMI1233	0.413	0	0	0	0.466	0	0.921	0.495	0.985
lysC	thrB	7103471	7100804	529507.PMI2755	529507.PMI0002	0.356	0	0.566	0	0.816	0.169	0.584	0.186	0.982
lysC	usg	7103471	7102535	529507.PMI2755	529507.PMI1790	0.381	0	0.194	0	0.809	0	0.673	0.381	0.977
metL	aspC	7103924	7101544	529507.PMI3224	529507.PMI0764	0.06	0	0	0	0.075	0	0.974	0.071	0.976
aspC	thrA	7101544	7100803	529507.PMI0764	529507.PMI0001	0.06	0	0	0	0.075	0	0.974	0.071	0.976
lysC	aspC	7103471	7101544	529507.PMI2755	529507.PMI0764	0.06	0	0	0	0.067	0	0.965	0.065	0.968
asd	thrC	7103841	7100805	529507.PMI3136	529507.PMI0003	0.381	0	0.218	0	0.823	0.126	0	0.386	0.945
lysC	thrC	7103471	7100805	529507.PMI2755	529507.PMI0003	0.356	0	0.269	0	0.822	0.169	0	0.28	0.94
usg	dapA	7102535	7102310	529507.PMI1790	529507.PMI1564	0.381	0	0.266	0	0.287	0	0.673	0.38	0.922
usg	thrC	7102535	7100805	529507.PMI1790	529507.PMI0003	0.381	0	0	0	0.823	0.126	0	0.183	0.911
usg	PMI1233	7102535	7101979	529507.PMI1790	529507.PMI1233	0.381	0	0.18	0	0.287	0	0.63	0.211	0.875
usg	thrB	7102535	7100804	529507.PMI1790	529507.PMI0002	0.381	0	0.304	0	0.661	0	0	0.16	0.86
dapA	PMI1233	7102310	7101979	529507.PMI1564	529507.PMI1233	0	0	0.778	0.646	0	0	0.8	0	0.854
asd	usg	7103841	7102535	529507.PMI3136	529507.PMI1790	0.089	0	0	0	0	0	0.8	0.046	0.811
asd	thrB	7103841	7100804	529507.PMI3136	529507.PMI0002	0.381	0	0	0	0.661	0	0	0.16	0.808
lysC	dapA	7103471	7102310	529507.PMI2755	529507.PMI1564	0.381	0	0.282	0	0.153	0	0.25	0.381	0.793
metA	lysC	7103481	7103471	529507.PMI2765	529507.PMI2755	0.044	0.272	0	0	0.095	0	0.584	0.123	0.728
lysC	PMI1233	7103471	7101979	529507.PMI2755	529507.PMI1233	0.381	0	0.214	0	0.153	0	0.25	0.211	0.711
metA	thrB	7103481	7100804	529507.PMI2765	529507.PMI0002	0.047	0	0	0	0	0	0	0.417	0.421
metF	metH	7103648	7103474	529507.PMI2932	529507.PMI2758	0.478	0	0	0	0.641	0	0.974	0.587	0.997
metH	metK	7103474	7102829	529507.PMI2758	529507.PMI2095	0.407	0	0	0	0.127	0	0.974	0.495	0.992
metH	PMI2726	7103474	7103442	529507.PMI2758	529507.PMI2726	0.46	0	0	0	0	0	0.974	0.451	0.991
metH	mdeA	7103474	7102987	529507.PMI2758	529507.PMI2254	0.303	0	0	0	0.063	0	0.974	0.495	0.99
metH	PMI1248	7103474	7101994	529507.PMI2758	529507.PMI1248	0.303	0	0	0	0.063	0	0.974	0.495	0.99
metH	PMI0626	7103474	7101410	529507.PMI2758	529507.PMI0626	0.303	0	0	0	0.063	0	0.974	0.495	0.99
metH	PMI0028	7103474	7100830	529507.PMI2758	529507.PMI0028	0.303	0	0	0	0.063	0	0.974	0.495	0.99
metB	metH	7103923	7103474	529507.PMI3223	529507.PMI2758	0.303	0	0	0	0.063	0	0.974	0.495	0.99
metF	glyA	7103648	7102609	529507.PMI2932	529507.PMI1867	0.061	0	0	0	0.131	0	0.965	0.558	0.986
metH	glyA	7103474	7102609	529507.PMI2758	529507.PMI1867	0.044	0	0	0	0.069	0	0.974	0.493	0.986
metH	luxS	7103474	7101166	529507.PMI2758	529507.PMI0379	0.381	0	0	0	0	0	0.974	0.176	0.985
metB	PMI0626	7103923	7101410	529507.PMI3223	529507.PMI0626	0	0	0.778	0.721	0.083	0	0.965	0.639	0.978
metB	PMI0028	7103923	7100830	529507.PMI3223	529507.PMI0028	0	0	0.778	0.72	0.083	0	0.965	0.638	0.978
mdeA	metK	7102987	7102829	529507.PMI2254	529507.PMI2095	0.044	0	0	0	0.114	0.454	0.9	0.567	0.976
metK	PMI1248	7102829	7101994	529507.PMI2095	529507.PMI1248	0.044	0	0	0	0.114	0.454	0.9	0.567	0.976
PMI2726	PMI0626	7103442	7101410	529507.PMI2726	529507.PMI0626	0.117	0	0.736	0.683	0.084	0	0.956	0.177	0.971
PMI2726	PMI0028	7103442	7100830	529507.PMI2726	529507.PMI0028	0.117	0	0.704	0.677	0.084	0	0.956	0.177	0.971
metB	PMI2726	7103923	7103442	529507.PMI3223	529507.PMI2726	0.117	0	0.775	0.796	0.064	0	0.956	0.231	0.968
metB	metF	7103923	7103648	529507.PMI3223	529507.PMI2932	0.381	0	0	0	0.48	0.215	0.539	0.665	0.953
metB	luxS	7103923	7101166	529507.PMI3223	529507.PMI0379	0.381	0	0	0	0	0	0.9	0.224	0.947
PMI0626	luxS	7101410	7101166	529507.PMI0626	529507.PMI0379	0.381	0	0	0	0	0	0.9	0.127	0.941
luxS	PMI0028	7101166	7100830	529507.PMI0379	529507.PMI0028	0.381	0	0	0	0	0	0.9	0.127	0.941
metF	PMI1248	7103648	7101994	529507.PMI2932	529507.PMI1248	0.381	0	0	0	0.48	0.215	0.539	0.47	0.927
metF	mdeA	7103648	7102987	529507.PMI2932	529507.PMI2254	0.381	0	0	0	0.48	0.215	0.539	0.47	0.927
PMI2726	luxS	7103442	7101166	529507.PMI2726	529507.PMI0379	0.043	0	0	0	0	0	0.9	0	0.9
metF	PMI0626	7103648	7101410	529507.PMI2932	529507.PMI0626	0.381	0	0	0	0.282	0.215	0.539	0.478	0.9
metF	PMI0028	7103648	7100830	529507.PMI2932	529507.PMI0028	0.381	0	0	0	0.282	0.215	0.539	0.478	0.9
metF	metK	7103648	7102829	529507.PMI2932	529507.PMI2095	0.381	0	0	0	0.341	0	0.539	0.462	0.885
mdeA	PMI1248	7102987	7101994	529507.PMI2254	529507.PMI1248	0	0	0.778	0.829	0	0	0.8	0	0.826
PMI0626	PMI0028	7101410	7100830	529507.PMI0626	529507.PMI0028	0	0	0.778	0.879	0	0	0.8	0	0.818
PMI1248	PMI0626	7101994	7101410	529507.PMI1248	529507.PMI0626	0	0	0.777	0.651	0.083	0	0.673	0.453	0.805
PMI1248	PMI0028	7101994	7100830	529507.PMI1248	529507.PMI0028	0	0	0.776	0.696	0.083	0	0.673	0.453	0.791
mdeA	PMI0028	7102987	7100830	529507.PMI2254	529507.PMI0028	0	0	0.778	0.744	0.083	0	0.673	0.453	0.776
metB	metK	7103923	7102829	529507.PMI3223	529507.PMI2095	0.044	0	0	0	0.114	0.454	0	0.567	0.772
mdeA	PMI0626	7102987	7101410	529507.PMI2254	529507.PMI0626	0	0	0.778	0.759	0.083	0	0.673	0.453	0.771
metF	PMI2726	7103648	7103442	529507.PMI2932	529507.PMI2726	0.381	0	0	0	0.059	0	0.537	0.111	0.728
PMI2726	PMI1248	7103442	7101994	529507.PMI2726	529507.PMI1248	0.117	0	0.77	0.766	0.064	0	0.581	0.231	0.704
PMI2726	mdeA	7103442	7102987	529507.PMI2726	529507.PMI2254	0.117	0	0.778	0.891	0.064	0	0.581	0.231	0.662
metK	PMI0028	7102829	7100830	529507.PMI2095	529507.PMI0028	0.044	0	0	0	0.114	0.454	0	0.281	0.622
metK	PMI0626	7102829	7101410	529507.PMI2095	529507.PMI0626	0.044	0	0	0	0.114	0.454	0	0.281	0.622
metK	glyA	7102829	7102609	529507.PMI2095	529507.PMI1867	0.042	0	0	0	0.26	0.123	0	0.455	0.615
metK	luxS	7102829	7101166	529507.PMI2095	529507.PMI0379	0.087	0	0	0	0	0	0	0.497	0.521
mdeA	luxS	7102987	7101166	529507.PMI2254	529507.PMI0379	0.381	0	0	0	0	0	0	0.164	0.46
PMI1248	luxS	7101994	7101166	529507.PMI1248	529507.PMI0379	0.381	0	0	0	0	0	0	0.127	0.436
asd	thrA	7103841	7100803	529507.PMI3136	529507.PMI0001	0.478	0	0	0	0.929	0.327	0.974	0.56	0.999
metL	thrA	7103924	7100803	529507.PMI3224	529507.PMI0001	0.478	0	0.777	0.691	0.927	0.897	0.947	0.494	0.999
metL	thrC	7103924	7100805	529507.PMI3224	529507.PMI0003	0.464	0	0.484	0	0.999	0.215	0.392	0.495	0.999
thrC	thrA	7100805	7100803	529507.PMI0003	529507.PMI0001	0.921	0	0.761	0	0.999	0.215	0.392	0.642	0.999
metL	asd	7103924	7103841	529507.PMI3224	529507.PMI3136	0.478	0	0	0	0.929	0.327	0.974	0.495	0.999
thrC	thrB	7100805	7100804	529507.PMI0003	529507.PMI0002	0.89	0.643	0.759	0	0.985	0	0.965	0.785	0.999
metL	thrB	7103924	7100804	529507.PMI3224	529507.PMI0002	0.464	0	0.564	0	0.999	0.215	0.974	0.495	0.999
thrB	thrA	7100804	7100803	529507.PMI0002	529507.PMI0001	0.921	0	0.771	0	0.999	0.215	0.974	0.495	0.999
asd	lysC	7103841	7103471	529507.PMI3136	529507.PMI2755	0.381	0	0	0	0.809	0	0.965	0.381	0.997
metL	usg	7103924	7102535	529507.PMI3224	529507.PMI1790	0.478	0	0.16	0	0.929	0.327	0.752	0.495	0.996
usg	thrA	7102535	7100803	529507.PMI1790	529507.PMI0001	0.478	0	0.203	0	0.929	0.327	0.752	0.495	0.996
metB	metA	7103923	7103481	529507.PMI3223	529507.PMI2765	0.381	0	0.185	0	0.393	0	0.965	0.629	0.995
metL	metB	7103924	7103923	529507.PMI3224	529507.PMI3223	0.908	0	0	0	0.475	0.119	0.8	0.475	0.994
metL	lysC	7103924	7103471	529507.PMI3224	529507.PMI2755	0.381	0	0.744	0.654	0.701	0.461	0.893	0.412	0.992
asd	dapA	7103841	7102310	529507.PMI3136	529507.PMI1564	0.381	0	0.163	0	0.287	0	0.965	0.472	0.992
metA	thrA	7103481	7100803	529507.PMI2765	529507.PMI0001	0.375	0.003	0.168	0	0.165	0	0.974	0.381	0.991
lysC	thrA	7103471	7100803	529507.PMI2755	529507.PMI0001	0.381	0	0.766	0.709	0.701	0.461	0.893	0.232	0.991
metL	metA	7103924	7103481	529507.PMI3224	529507.PMI2765	0.375	0	0	0	0.165	0	0.974	0.381	0.99
dapA	thrA	7102310	7100803	529507.PMI1564	529507.PMI0001	0.413	0	0.238	0	0.466	0	0.921	0.516	0.989
metL	dapA	7103924	7102310	529507.PMI3224	529507.PMI1564	0.413	0	0.152	0	0.466	0	0.921	0.495	0.987
asd	PMI1233	7103841	7101979	529507.PMI3136	529507.PMI1233	0.381	0	0	0	0.287	0	0.965	0.211	0.986
metL	PMI1233	7103924	7101979	529507.PMI3224	529507.PMI1233	0.413	0	0	0	0.466	0	0.921	0.495	0.985
PMI1233	thrA	7101979	7100803	529507.PMI1233	529507.PMI0001	0.413	0	0	0	0.466	0	0.921	0.495	0.985
lysC	thrB	7103471	7100804	529507.PMI2755	529507.PMI0002	0.356	0	0.566	0	0.816	0.169	0.584	0.186	0.982
lysC	usg	7103471	7102535	529507.PMI2755	529507.PMI1790	0.381	0	0.194	0	0.809	0	0.673	0.381	0.977
metB	thrA	7103923	7100803	529507.PMI3223	529507.PMI0001	0.433	0	0	0	0.475	0.119	0.8	0.475	0.967
metB	thrB	7103923	7100804	529507.PMI3223	529507.PMI0002	0.381	0	0	0	0.103	0	0.905	0.145	0.949
asd	thrC	7103841	7100805	529507.PMI3136	529507.PMI0003	0.381	0	0.218	0	0.823	0.126	0	0.386	0.945
lysC	thrC	7103471	7100805	529507.PMI2755	529507.PMI0003	0.356	0	0.269	0	0.822	0.169	0	0.28	0.94
usg	dapA	7102535	7102310	529507.PMI1790	529507.PMI1564	0.381	0	0.266	0	0.287	0	0.673	0.38	0.922
usg	thrC	7102535	7100805	529507.PMI1790	529507.PMI0003	0.381	0	0	0	0.823	0.126	0	0.183	0.911
usg	PMI1233	7102535	7101979	529507.PMI1790	529507.PMI1233	0.381	0	0.18	0	0.287	0	0.63	0.211	0.875
usg	thrB	7102535	7100804	529507.PMI1790	529507.PMI0002	0.381	0	0.304	0	0.661	0	0	0.16	0.86
dapA	PMI1233	7102310	7101979	529507.PMI1564	529507.PMI1233	0	0	0.778	0.646	0	0	0.8	0	0.854
asd	usg	7103841	7102535	529507.PMI3136	529507.PMI1790	0.089	0	0	0	0	0	0.8	0.046	0.811
asd	thrB	7103841	7100804	529507.PMI3136	529507.PMI0002	0.381	0	0	0	0.661	0	0	0.16	0.808
lysC	dapA	7103471	7102310	529507.PMI2755	529507.PMI1564	0.381	0	0.282	0	0.153	0	0.25	0.381	0.793
metA	lysC	7103481	7103471	529507.PMI2765	529507.PMI2755	0.044	0.272	0	0	0.095	0	0.584	0.123	0.728
lysC	PMI1233	7103471	7101979	529507.PMI2755	529507.PMI1233	0.381	0	0.214	0	0.153	0	0.25	0.211	0.711
metA	thrB	7103481	7100804	529507.PMI2765	529507.PMI0002	0.047	0	0	0	0	0	0	0.417	0.421
metB	usg	7103923	7102535	529507.PMI3223	529507.PMI1790	0.381	0	0	0	0.059	0	0	0.075	0.414
metB	asd	7103923	7103841	529507.PMI3223	529507.PMI3136	0.381	0	0	0	0.059	0	0	0.075	0.414
metF	metH	7103648	7103474	529507.PMI2932	529507.PMI2758	0.478	0	0	0	0.641	0	0.974	0.587	0.997
metE	metK	7104221	7102829	529507.PMI3529	529507.PMI2095	0.06	0	0	0	0.661	0.213	0.965	0.632	0.996
metE	metB	7104221	7103923	529507.PMI3529	529507.PMI3223	0.302	0	0	0	0.129	0	0.965	0.807	0.995
metH	metK	7103474	7102829	529507.PMI2758	529507.PMI2095	0.407	0	0	0	0.127	0	0.974	0.495	0.992
metE	PMI1248	7104221	7101994	529507.PMI3529	529507.PMI1248	0.302	0	0	0	0.129	0	0.965	0.638	0.991
metE	mdeA	7104221	7102987	529507.PMI3529	529507.PMI2254	0.302	0	0	0	0.129	0	0.965	0.638	0.991
metH	PMI2726	7103474	7103442	529507.PMI2758	529507.PMI2726	0.46	0	0	0	0	0	0.974	0.451	0.991
metH	PMI1248	7103474	7101994	529507.PMI2758	529507.PMI1248	0.303	0	0	0	0.063	0	0.974	0.495	0.99
metH	mdeA	7103474	7102987	529507.PMI2758	529507.PMI2254	0.303	0	0	0	0.063	0	0.974	0.495	0.99
metH	PMI0626	7103474	7101410	529507.PMI2758	529507.PMI0626	0.303	0	0	0	0.063	0	0.974	0.495	0.99
metE	metF	7104221	7103648	529507.PMI3529	529507.PMI2932	0.381	0	0.311	0	0.819	0.123	0.581	0.72	0.99
metH	PMI0028	7103474	7100830	529507.PMI2758	529507.PMI0028	0.303	0	0	0	0.063	0	0.974	0.495	0.99
metB	metH	7103923	7103474	529507.PMI3223	529507.PMI2758	0.303	0	0	0	0.063	0	0.974	0.495	0.99
metE	PMI0028	7104221	7100830	529507.PMI3529	529507.PMI0028	0.302	0	0	0	0.128	0	0.965	0.454	0.987
metE	PMI0626	7104221	7101410	529507.PMI3529	529507.PMI0626	0.302	0	0	0	0.128	0	0.965	0.454	0.987
metH	luxS	7103474	7101166	529507.PMI2758	529507.PMI0379	0.381	0	0	0	0	0	0.974	0.176	0.985
metE	metH	7104221	7103474	529507.PMI3529	529507.PMI2758	0.386	0	0	0	0.1	0	0.894	0.682	0.979
metB	PMI0626	7103923	7101410	529507.PMI3223	529507.PMI0626	0	0	0.778	0.721	0.083	0	0.965	0.639	0.978
metB	PMI0028	7103923	7100830	529507.PMI3223	529507.PMI0028	0	0	0.778	0.72	0.083	0	0.965	0.638	0.978
metE	luxS	7104221	7101166	529507.PMI3529	529507.PMI0379	0.302	0	0	0	0	0	0.965	0.186	0.978
mdeA	metK	7102987	7102829	529507.PMI2254	529507.PMI2095	0.044	0	0	0	0.114	0.454	0.9	0.567	0.976
metK	PMI1248	7102829	7101994	529507.PMI2095	529507.PMI1248	0.044	0	0	0	0.114	0.454	0.9	0.567	0.976
metE	PMI2726	7104221	7103442	529507.PMI3529	529507.PMI2726	0.133	0	0	0	0.149	0	0.965	0.12	0.974
PMI2726	PMI0028	7103442	7100830	529507.PMI2726	529507.PMI0028	0.117	0	0.704	0.677	0.084	0	0.956	0.177	0.971
PMI2726	PMI0626	7103442	7101410	529507.PMI2726	529507.PMI0626	0.117	0	0.736	0.683	0.084	0	0.956	0.177	0.971
metB	PMI2726	7103923	7103442	529507.PMI3223	529507.PMI2726	0.117	0	0.775	0.796	0.064	0	0.956	0.231	0.968
metB	metF	7103923	7103648	529507.PMI3223	529507.PMI2932	0.381	0	0	0	0.48	0.215	0.539	0.665	0.953
metB	luxS	7103923	7101166	529507.PMI3223	529507.PMI0379	0.381	0	0	0	0	0	0.9	0.224	0.947
luxS	PMI0028	7101166	7100830	529507.PMI0379	529507.PMI0028	0.381	0	0	0	0	0	0.9	0.127	0.941
PMI0626	luxS	7101410	7101166	529507.PMI0626	529507.PMI0379	0.381	0	0	0	0	0	0.9	0.127	0.941
metF	PMI1248	7103648	7101994	529507.PMI2932	529507.PMI1248	0.381	0	0	0	0.48	0.215	0.539	0.47	0.927
metF	mdeA	7103648	7102987	529507.PMI2932	529507.PMI2254	0.381	0	0	0	0.48	0.215	0.539	0.47	0.927
metF	PMI0626	7103648	7101410	529507.PMI2932	529507.PMI0626	0.381	0	0	0	0.282	0.215	0.539	0.478	0.9
PMI2726	luxS	7103442	7101166	529507.PMI2726	529507.PMI0379	0.043	0	0	0	0	0	0.9	0	0.9
metF	PMI0028	7103648	7100830	529507.PMI2932	529507.PMI0028	0.381	0	0	0	0.282	0.215	0.539	0.478	0.9
metF	metK	7103648	7102829	529507.PMI2932	529507.PMI2095	0.381	0	0	0	0.341	0	0.539	0.462	0.885
mdeA	PMI1248	7102987	7101994	529507.PMI2254	529507.PMI1248	0	0	0.778	0.829	0	0	0.8	0	0.826
PMI0626	PMI0028	7101410	7100830	529507.PMI0626	529507.PMI0028	0	0	0.778	0.879	0	0	0.8	0	0.818
PMI1248	PMI0626	7101994	7101410	529507.PMI1248	529507.PMI0626	0	0	0.777	0.651	0.083	0	0.673	0.453	0.805
PMI1248	PMI0028	7101994	7100830	529507.PMI1248	529507.PMI0028	0	0	0.776	0.696	0.083	0	0.673	0.453	0.791
mdeA	PMI0028	7102987	7100830	529507.PMI2254	529507.PMI0028	0	0	0.778	0.744	0.083	0	0.673	0.453	0.776
metB	metK	7103923	7102829	529507.PMI3223	529507.PMI2095	0.044	0	0	0	0.114	0.454	0	0.567	0.772
mdeA	PMI0626	7102987	7101410	529507.PMI2254	529507.PMI0626	0	0	0.778	0.759	0.083	0	0.673	0.453	0.771
metF	PMI2726	7103648	7103442	529507.PMI2932	529507.PMI2726	0.381	0	0	0	0.059	0	0.537	0.111	0.728
PMI2726	PMI1248	7103442	7101994	529507.PMI2726	529507.PMI1248	0.117	0	0.77	0.766	0.064	0	0.581	0.231	0.704
PMI2726	mdeA	7103442	7102987	529507.PMI2726	529507.PMI2254	0.117	0	0.778	0.891	0.064	0	0.581	0.231	0.662
metK	PMI0028	7102829	7100830	529507.PMI2095	529507.PMI0028	0.044	0	0	0	0.114	0.454	0	0.281	0.622
metK	PMI0626	7102829	7101410	529507.PMI2095	529507.PMI0626	0.044	0	0	0	0.114	0.454	0	0.281	0.622
metK	luxS	7102829	7101166	529507.PMI2095	529507.PMI0379	0.087	0	0	0	0	0	0	0.497	0.521
mdeA	luxS	7102987	7101166	529507.PMI2254	529507.PMI0379	0.381	0	0	0	0	0	0	0.164	0.46
PMI1248	luxS	7101994	7101166	529507.PMI1248	529507.PMI0379	0.381	0	0	0	0	0	0	0.127	0.436
metL	thrA	7103924	7100803	529507.PMI3224	529507.PMI0001	0.478	0	0.777	0.691	0.927	0.897	0.947	0.494	0.999
metE	metB	7104221	7103923	529507.PMI3529	529507.PMI3223	0.302	0	0	0	0.129	0	0.965	0.807	0.995
metL	metB	7103924	7103923	529507.PMI3224	529507.PMI3223	0.908	0	0	0	0.475	0.119	0.8	0.475	0.994
metH	PMI2726	7103474	7103442	529507.PMI2758	529507.PMI2726	0.46	0	0	0	0	0	0.974	0.451	0.991
metB	cysK	7103923	7102569	529507.PMI3223	529507.PMI1827	0.381	0.001	0.182	0	0.118	0.215	0.965	0.39	0.991
metB	metH	7103923	7103474	529507.PMI3223	529507.PMI2758	0.303	0	0	0	0.063	0	0.974	0.495	0.99
metH	PMI0626	7103474	7101410	529507.PMI2758	529507.PMI0626	0.303	0	0	0	0.063	0	0.974	0.495	0.99
metB	cysM	7103923	7102573	529507.PMI3223	529507.PMI1831	0.381	0.003	0.158	0	0.118	0.215	0.965	0.365	0.99
metE	PMI0626	7104221	7101410	529507.PMI3529	529507.PMI0626	0.302	0	0	0	0.128	0	0.965	0.454	0.987
cysM	PMI0626	7102573	7101410	529507.PMI1831	529507.PMI0626	0.381	0.002	0	0	0.118	0.215	0.956	0.299	0.984
cysK	PMI0626	7102569	7101410	529507.PMI1827	529507.PMI0626	0.381	0.001	0.174	0	0.118	0.215	0.956	0.211	0.984
metB	PMI1275	7103923	7102021	529507.PMI3223	529507.PMI1275	0.381	0	0	0	0	0	0.965	0.177	0.981
metE	metH	7104221	7103474	529507.PMI3529	529507.PMI2758	0.386	0	0	0	0.1	0	0.894	0.682	0.979
metB	PMI0626	7103923	7101410	529507.PMI3223	529507.PMI0626	0	0	0.778	0.721	0.083	0	0.965	0.639	0.978
metH	thrA	7103474	7100803	529507.PMI2758	529507.PMI0001	0.479	0	0	0	0.063	0	0.8	0.786	0.976
metL	metH	7103924	7103474	529507.PMI3224	529507.PMI2758	0.479	0	0	0	0.063	0	0.8	0.786	0.976
metH	PMI1275	7103474	7102021	529507.PMI2758	529507.PMI1275	0	0	0	0	0	0	0.974	0.098	0.975
metE	PMI2726	7104221	7103442	529507.PMI3529	529507.PMI2726	0.133	0	0	0	0.149	0	0.965	0.12	0.974
PMI0626	sseA	7101410	7101407	529507.PMI0626	529507.PMI0623	0.597	0.285	0	0	0.081	0	0.9	0.11	0.972
PMI2726	PMI0626	7103442	7101410	529507.PMI2726	529507.PMI0626	0.117	0	0.736	0.683	0.084	0	0.956	0.177	0.971
metB	PMI2726	7103923	7103442	529507.PMI3223	529507.PMI2726	0.117	0	0.775	0.796	0.064	0	0.956	0.231	0.968
metB	thrA	7103923	7100803	529507.PMI3223	529507.PMI0001	0.433	0	0	0	0.475	0.119	0.8	0.475	0.967
metL	PMI0626	7103924	7101410	529507.PMI3224	529507.PMI0626	0.433	0	0	0	0.475	0.119	0.8	0.475	0.967
metE	PMI1275	7104221	7102021	529507.PMI3529	529507.PMI1275	0.061	0	0	0	0	0	0.965	0.071	0.967
PMI0626	thrA	7101410	7100803	529507.PMI0626	529507.PMI0001	0.433	0	0	0	0.475	0.119	0.8	0.475	0.967
PMI2726	PMI1275	7103442	7102021	529507.PMI2726	529507.PMI1275	0.064	0	0.151	0	0	0	0.956	0.061	0.963
metL	PMI2726	7103924	7103442	529507.PMI3224	529507.PMI2726	0.438	0	0	0	0.061	0	0.914	0.129	0.955
PMI2726	thrA	7103442	7100803	529507.PMI2726	529507.PMI0001	0.438	0	0	0	0.061	0	0.914	0.129	0.955
metH	cysK	7103474	7102569	529507.PMI2758	529507.PMI1827	0.059	0	0	0	0.065	0	0.911	0.486	0.954
metH	cysM	7103474	7102573	529507.PMI2758	529507.PMI1831	0.059	0	0	0	0.065	0	0.911	0.486	0.954
PMI1275	PMI0626	7102021	7101410	529507.PMI1275	529507.PMI0626	0.381	0	0	0	0	0	0.912	0.177	0.951
PMI2726	cysM	7103442	7102573	529507.PMI2726	529507.PMI1831	0.381	0.001	0	0	0.062	0	0.912	0.147	0.95
PMI2726	cysK	7103442	7102569	529507.PMI2726	529507.PMI1827	0.381	0	0	0	0.062	0	0.912	0.147	0.95
metL	PMI1275	7103924	7102021	529507.PMI3224	529507.PMI1275	0	0	0	0	0	0	0.922	0.064	0.924
PMI1275	thrA	7102021	7100803	529507.PMI1275	529507.PMI0001	0	0	0	0	0	0	0.922	0.064	0.924
cysK	PMI1275	7102569	7102021	529507.PMI1827	529507.PMI1275	0.096	0	0	0	0	0	0.9	0.128	0.914
cysM	PMI1275	7102573	7102021	529507.PMI1831	529507.PMI1275	0.096	0	0	0	0	0	0.9	0.128	0.914
PMI1275	sseA	7102021	7101407	529507.PMI1275	529507.PMI0623	0.048	0	0	0	0	0	0.9	0	0.9
metE	thrA	7104221	7100803	529507.PMI3529	529507.PMI0001	0.061	0	0	0	0.151	0	0.8	0.407	0.892
metE	metL	7104221	7103924	529507.PMI3529	529507.PMI3224	0.061	0	0	0	0.151	0	0.8	0.407	0.892
metE	cysK	7104221	7102569	529507.PMI3529	529507.PMI1827	0	0	0	0	0.063	0	0.862	0.19	0.886
metE	cysM	7104221	7102573	529507.PMI3529	529507.PMI1831	0	0	0	0	0.063	0	0.862	0.171	0.883
cysM	sseA	7102573	7101407	529507.PMI1831	529507.PMI0623	0.381	0	0	0	0.065	0	0.8	0.11	0.883
cysK	sseA	7102569	7101407	529507.PMI1827	529507.PMI0623	0.381	0	0	0	0.065	0	0.8	0.11	0.883
cysM	cysK	7102573	7102569	529507.PMI1831	529507.PMI1827	0	0	0.778	0.824	0	0	0.8	0.396	0.838
metB	sseA	7103923	7101407	529507.PMI3223	529507.PMI0623	0.126	0.03	0	0	0.081	0	0.8	0.11	0.837
cysK	thrA	7102569	7100803	529507.PMI1827	529507.PMI0001	0.099	0	0.162	0	0.129	0	0	0.431	0.575
cysM	thrA	7102573	7100803	529507.PMI1831	529507.PMI0001	0.099	0	0	0	0.129	0	0	0.431	0.514
metL	cysK	7103924	7102569	529507.PMI3224	529507.PMI1827	0.099	0	0	0	0.129	0	0	0.431	0.514
metL	cysM	7103924	7102573	529507.PMI3224	529507.PMI1831	0.099	0	0	0	0.129	0	0	0.431	0.514
metL	thrA	7103924	7100803	529507.PMI3224	529507.PMI0001	0.478	0	0.777	0.691	0.927	0.897	0.947	0.494	0.999
metE	metB	7104221	7103923	529507.PMI3529	529507.PMI3223	0.302	0	0	0	0.129	0	0.965	0.807	0.995
metL	metB	7103924	7103923	529507.PMI3224	529507.PMI3223	0.908	0	0	0	0.475	0.119	0.8	0.475	0.994
metH	PMI2726	7103474	7103442	529507.PMI2758	529507.PMI2726	0.46	0	0	0	0	0	0.974	0.451	0.991
metB	cysK	7103923	7102569	529507.PMI3223	529507.PMI1827	0.381	0.001	0.182	0	0.118	0.215	0.965	0.39	0.991
metB	cysM	7103923	7102573	529507.PMI3223	529507.PMI1831	0.381	0.003	0.158	0	0.118	0.215	0.965	0.365	0.99
metH	PMI0028	7103474	7100830	529507.PMI2758	529507.PMI0028	0.303	0	0	0	0.063	0	0.974	0.495	0.99
metB	metH	7103923	7103474	529507.PMI3223	529507.PMI2758	0.303	0	0	0	0.063	0	0.974	0.495	0.99
metE	PMI0028	7104221	7100830	529507.PMI3529	529507.PMI0028	0.302	0	0	0	0.128	0	0.965	0.454	0.987
cysK	PMI0028	7102569	7100830	529507.PMI1827	529507.PMI0028	0.381	0	0.18	0	0.118	0.215	0.956	0.211	0.985
cysM	PMI0028	7102573	7100830	529507.PMI1831	529507.PMI0028	0.381	0.001	0	0	0.118	0.215	0.956	0.299	0.984
metB	PMI1275	7103923	7102021	529507.PMI3223	529507.PMI1275	0.381	0	0	0	0	0	0.965	0.177	0.981
metE	metH	7104221	7103474	529507.PMI3529	529507.PMI2758	0.386	0	0	0	0.1	0	0.894	0.682	0.979
metB	PMI0028	7103923	7100830	529507.PMI3223	529507.PMI0028	0	0	0.778	0.72	0.083	0	0.965	0.638	0.978
metH	thrA	7103474	7100803	529507.PMI2758	529507.PMI0001	0.479	0	0	0	0.063	0	0.8	0.786	0.976
metL	metH	7103924	7103474	529507.PMI3224	529507.PMI2758	0.479	0	0	0	0.063	0	0.8	0.786	0.976
metH	PMI1275	7103474	7102021	529507.PMI2758	529507.PMI1275	0	0	0	0	0	0	0.974	0.098	0.975
metE	PMI2726	7104221	7103442	529507.PMI3529	529507.PMI2726	0.133	0	0	0	0.149	0	0.965	0.12	0.974
PMI2726	PMI0028	7103442	7100830	529507.PMI2726	529507.PMI0028	0.117	0	0.704	0.677	0.084	0	0.956	0.177	0.971
metB	PMI2726	7103923	7103442	529507.PMI3223	529507.PMI2726	0.117	0	0.775	0.796	0.064	0	0.956	0.231	0.968
metB	thrA	7103923	7100803	529507.PMI3223	529507.PMI0001	0.433	0	0	0	0.475	0.119	0.8	0.475	0.967
metL	PMI0028	7103924	7100830	529507.PMI3224	529507.PMI0028	0.433	0	0	0	0.475	0.119	0.8	0.475	0.967
PMI0028	thrA	7100830	7100803	529507.PMI0028	529507.PMI0001	0.433	0	0	0	0.475	0.119	0.8	0.475	0.967
metE	PMI1275	7104221	7102021	529507.PMI3529	529507.PMI1275	0.061	0	0	0	0	0	0.965	0.071	0.967
PMI2726	PMI1275	7103442	7102021	529507.PMI2726	529507.PMI1275	0.064	0	0.151	0	0	0	0.956	0.061	0.963
sseA	PMI0028	7101407	7100830	529507.PMI0623	529507.PMI0028	0.369	0.341	0	0	0.081	0	0.9	0.11	0.959
PMI2726	thrA	7103442	7100803	529507.PMI2726	529507.PMI0001	0.438	0	0	0	0.061	0	0.914	0.129	0.955
metL	PMI2726	7103924	7103442	529507.PMI3224	529507.PMI2726	0.438	0	0	0	0.061	0	0.914	0.129	0.955
metH	cysM	7103474	7102573	529507.PMI2758	529507.PMI1831	0.059	0	0	0	0.065	0	0.911	0.486	0.954
metH	cysK	7103474	7102569	529507.PMI2758	529507.PMI1827	0.059	0	0	0	0.065	0	0.911	0.486	0.954
PMI1275	PMI0028	7102021	7100830	529507.PMI1275	529507.PMI0028	0.381	0	0	0	0	0	0.912	0.177	0.951
PMI2726	cysK	7103442	7102569	529507.PMI2726	529507.PMI1827	0.381	0	0	0	0.062	0	0.912	0.147	0.95
PMI2726	cysM	7103442	7102573	529507.PMI2726	529507.PMI1831	0.381	0.001	0	0	0.062	0	0.912	0.147	0.95
PMI1275	thrA	7102021	7100803	529507.PMI1275	529507.PMI0001	0	0	0	0	0	0	0.922	0.064	0.924
metL	PMI1275	7103924	7102021	529507.PMI3224	529507.PMI1275	0	0	0	0	0	0	0.922	0.064	0.924
cysK	PMI1275	7102569	7102021	529507.PMI1827	529507.PMI1275	0.096	0	0	0	0	0	0.9	0.128	0.914
cysM	PMI1275	7102573	7102021	529507.PMI1831	529507.PMI1275	0.096	0	0	0	0	0	0.9	0.128	0.914
PMI1275	sseA	7102021	7101407	529507.PMI1275	529507.PMI0623	0.048	0	0	0	0	0	0.9	0	0.9
metE	metL	7104221	7103924	529507.PMI3529	529507.PMI3224	0.061	0	0	0	0.151	0	0.8	0.407	0.892
metE	thrA	7104221	7100803	529507.PMI3529	529507.PMI0001	0.061	0	0	0	0.151	0	0.8	0.407	0.892
metE	cysK	7104221	7102569	529507.PMI3529	529507.PMI1827	0	0	0	0	0.063	0	0.862	0.19	0.886
cysK	sseA	7102569	7101407	529507.PMI1827	529507.PMI0623	0.381	0	0	0	0.065	0	0.8	0.11	0.883
metE	cysM	7104221	7102573	529507.PMI3529	529507.PMI1831	0	0	0	0	0.063	0	0.862	0.171	0.883
cysM	sseA	7102573	7101407	529507.PMI1831	529507.PMI0623	0.381	0	0	0	0.065	0	0.8	0.11	0.883
cysM	cysK	7102573	7102569	529507.PMI1831	529507.PMI1827	0	0	0.778	0.824	0	0	0.8	0.396	0.838
metB	sseA	7103923	7101407	529507.PMI3223	529507.PMI0623	0.126	0.03	0	0	0.081	0	0.8	0.11	0.837
cysK	thrA	7102569	7100803	529507.PMI1827	529507.PMI0001	0.099	0	0.162	0	0.129	0	0	0.431	0.575
metL	cysK	7103924	7102569	529507.PMI3224	529507.PMI1827	0.099	0	0	0	0.129	0	0	0.431	0.514
metL	cysM	7103924	7102573	529507.PMI3224	529507.PMI1831	0.099	0	0	0	0.129	0	0	0.431	0.514
cysM	thrA	7102573	7100803	529507.PMI1831	529507.PMI0001	0.099	0	0	0	0.129	0	0	0.431	0.514
cysE	cysK	7103886	7102569	529507.PMI3185	529507.PMI1827	0.381	0	0.751	0	0.069	0.586	0.965	0.677	0.999
cysJ	cysI	7102983	7102982	529507.PMI2250	529507.PMI2249	0.89	0.233	0.778	0	0.837	0.494	0.931	0.811	0.999
cysI	cysK	7102982	7102569	529507.PMI2249	529507.PMI1827	0.304	0	0	0	0.228	0	0.965	0.734	0.994
PMI3186	cysK	7103887	7102569	529507.PMI3186	529507.PMI1827	0.381	0	0.507	0	0.069	0.461	0.955	0.109	0.992
metB	cysK	7103923	7102569	529507.PMI3223	529507.PMI1827	0.381	0.001	0.182	0	0.118	0.215	0.965	0.39	0.991
metB	metH	7103923	7103474	529507.PMI3223	529507.PMI2758	0.303	0	0	0	0.063	0	0.974	0.495	0.99
metH	PMI0028	7103474	7100830	529507.PMI2758	529507.PMI0028	0.303	0	0	0	0.063	0	0.974	0.495	0.99
metH	PMI0626	7103474	7101410	529507.PMI2758	529507.PMI0626	0.303	0	0	0	0.063	0	0.974	0.495	0.99
cysJ	cysK	7102983	7102569	529507.PMI2250	529507.PMI1827	0.092	0	0	0	0.225	0.125	0.965	0.524	0.988
cysK	PMI0028	7102569	7100830	529507.PMI1827	529507.PMI0028	0.381	0	0.18	0	0.118	0.215	0.956	0.211	0.985
cysK	PMI0626	7102569	7101410	529507.PMI1827	529507.PMI0626	0.381	0.001	0.174	0	0.118	0.215	0.956	0.211	0.984
metB	PMI0028	7103923	7100830	529507.PMI3223	529507.PMI0028	0	0	0.778	0.72	0.083	0	0.965	0.638	0.978
metB	PMI0626	7103923	7101410	529507.PMI3223	529507.PMI0626	0	0	0.778	0.721	0.083	0	0.965	0.639	0.978
metB	cysI	7103923	7102982	529507.PMI3223	529507.PMI2249	0.063	0	0	0	0.081	0.122	0.956	0.293	0.972
cysI	PMI0794	7102982	7101571	529507.PMI2249	529507.PMI0794	0	0	0	0	0	0	0.965	0	0.965
cysJ	PMI0794	7102983	7101571	529507.PMI2250	529507.PMI0794	0	0	0	0	0	0	0.965	0	0.965
cysK	PMI0794	7102569	7101571	529507.PMI1827	529507.PMI0794	0	0	0	0	0	0	0.965	0	0.965
cysI	phsA	7102982	7102558	529507.PMI2249	529507.PMI1814	0.131	0	0	0	0	0	0.951	0.158	0.961
metB	cysJ	7103923	7102983	529507.PMI3223	529507.PMI2250	0.043	0	0	0	0.076	0	0.956	0.069	0.959
PMI3186	cysE	7103887	7103886	529507.PMI3186	529507.PMI3185	0.859	0	0.72	0	0	0	0	0	0.958
metH	cysK	7103474	7102569	529507.PMI2758	529507.PMI1827	0.059	0	0	0	0.065	0	0.911	0.486	0.954
cysK	phsA	7102569	7102558	529507.PMI1827	529507.PMI1814	0	0	0	0	0	0	0.951	0.061	0.952
phsA	PMI0794	7102558	7101571	529507.PMI1814	529507.PMI0794	0	0	0	0	0	0	0.947	0	0.947
cysJ	phsA	7102983	7102558	529507.PMI2250	529507.PMI1814	0.101	0.003	0	0	0	0	0.9	0.389	0.94
metB	phsA	7103923	7102558	529507.PMI3223	529507.PMI1814	0	0	0	0	0	0	0.9	0	0.9
metH	cysJ	7103474	7102983	529507.PMI2758	529507.PMI2250	0	0	0	0	0.065	0.215	0.752	0.171	0.828
PMI0626	PMI0028	7101410	7100830	529507.PMI0626	529507.PMI0028	0	0	0.778	0.879	0	0	0.8	0	0.818
cysI	PMI0626	7102982	7101410	529507.PMI2249	529507.PMI0626	0.063	0	0	0	0.081	0.122	0.581	0.422	0.783
cysI	PMI0028	7102982	7100830	529507.PMI2249	529507.PMI0028	0.063	0	0	0	0.081	0.122	0.581	0.422	0.783
metB	cysE	7103923	7103886	529507.PMI3223	529507.PMI3185	0.381	0	0	0	0	0	0.339	0.46	0.76
cysE	PMI0626	7103886	7101410	529507.PMI3185	529507.PMI0626	0.381	0	0	0	0	0	0.244	0.461	0.726
cysE	PMI0028	7103886	7100830	529507.PMI3185	529507.PMI0028	0.381	0	0	0	0	0	0.244	0.46	0.725
cysJ	PMI0626	7102983	7101410	529507.PMI2250	529507.PMI0626	0.043	0	0	0	0.076	0	0.581	0.227	0.675
cysJ	PMI0028	7102983	7100830	529507.PMI2250	529507.PMI0028	0.043	0	0	0	0.076	0	0.581	0.227	0.675
cysE	cysI	7103886	7102982	529507.PMI3185	529507.PMI2249	0.121	0	0	0	0.048	0	0	0.595	0.631
cysE	cysJ	7103886	7102983	529507.PMI3185	529507.PMI2250	0.1	0	0	0	0	0	0	0.482	0.514
metB	PMI3186	7103923	7103887	529507.PMI3223	529507.PMI3186	0.381	0	0	0	0	0	0.105	0.109	0.463
PMI3186	PMI0626	7103887	7101410	529507.PMI3186	529507.PMI0626	0.381	0	0	0	0	0	0.105	0.109	0.463
PMI3186	PMI0028	7103887	7100830	529507.PMI3186	529507.PMI0028	0.381	0	0	0	0	0	0.105	0.109	0.463
metE	metB	7104221	7103923	529507.PMI3529	529507.PMI3223	0.302	0	0	0	0.129	0	0.965	0.807	0.995
metB	metA	7103923	7103481	529507.PMI3223	529507.PMI2765	0.381	0	0.185	0	0.393	0	0.965	0.629	0.995
metL	metB	7103924	7103923	529507.PMI3224	529507.PMI3223	0.908	0	0	0	0.475	0.119	0.8	0.475	0.994
metB	cysK	7103923	7102569	529507.PMI3223	529507.PMI1827	0.381	0.001	0.182	0	0.118	0.215	0.965	0.39	0.991
metL	metA	7103924	7103481	529507.PMI3224	529507.PMI2765	0.375	0	0	0	0.165	0	0.974	0.381	0.99
metB	PMI0235	7103923	7101031	529507.PMI3223	529507.PMI0235	0.381	0.008	0.31	0	0.118	0.215	0.963	0.278	0.99
metH	PMI0028	7103474	7100830	529507.PMI2758	529507.PMI0028	0.303	0	0	0	0.063	0	0.974	0.495	0.99
metB	cysM	7103923	7102573	529507.PMI3223	529507.PMI1831	0.381	0.003	0.158	0	0.118	0.215	0.965	0.365	0.99
metH	PMI0626	7103474	7101410	529507.PMI2758	529507.PMI0626	0.303	0	0	0	0.063	0	0.974	0.495	0.99
metB	metH	7103923	7103474	529507.PMI3223	529507.PMI2758	0.303	0	0	0	0.063	0	0.974	0.495	0.99
metE	PMI0028	7104221	7100830	529507.PMI3529	529507.PMI0028	0.302	0	0	0	0.128	0	0.965	0.454	0.987
metE	PMI0626	7104221	7101410	529507.PMI3529	529507.PMI0626	0.302	0	0	0	0.128	0	0.965	0.454	0.987
cysK	PMI0028	7102569	7100830	529507.PMI1827	529507.PMI0028	0.381	0	0.18	0	0.118	0.215	0.956	0.211	0.985
cysK	PMI0626	7102569	7101410	529507.PMI1827	529507.PMI0626	0.381	0.001	0.174	0	0.118	0.215	0.956	0.211	0.984
cysM	PMI0626	7102573	7101410	529507.PMI1831	529507.PMI0626	0.381	0.002	0	0	0.118	0.215	0.956	0.299	0.984
cysM	PMI0028	7102573	7100830	529507.PMI1831	529507.PMI0028	0.381	0.001	0	0	0.118	0.215	0.956	0.299	0.984
metB	PMI1275	7103923	7102021	529507.PMI3223	529507.PMI1275	0.381	0	0	0	0	0	0.965	0.177	0.981
metE	metH	7104221	7103474	529507.PMI3529	529507.PMI2758	0.386	0	0	0	0.1	0	0.894	0.682	0.979
metB	PMI0626	7103923	7101410	529507.PMI3223	529507.PMI0626	0	0	0.778	0.721	0.083	0	0.965	0.639	0.978
metB	PMI0028	7103923	7100830	529507.PMI3223	529507.PMI0028	0	0	0.778	0.72	0.083	0	0.965	0.638	0.978
metH	PMI0235	7103474	7101031	529507.PMI2758	529507.PMI0235	0.059	0	0	0	0.065	0	0.955	0.486	0.977
metL	metH	7103924	7103474	529507.PMI3224	529507.PMI2758	0.479	0	0	0	0.063	0	0.8	0.786	0.976
metH	PMI1275	7103474	7102021	529507.PMI2758	529507.PMI1275	0	0	0	0	0	0	0.974	0.098	0.975
metL	PMI0028	7103924	7100830	529507.PMI3224	529507.PMI0028	0.433	0	0	0	0.475	0.119	0.8	0.475	0.967
metL	PMI0626	7103924	7101410	529507.PMI3224	529507.PMI0626	0.433	0	0	0	0.475	0.119	0.8	0.475	0.967
metE	PMI1275	7104221	7102021	529507.PMI3529	529507.PMI1275	0.061	0	0	0	0	0	0.965	0.071	0.967
metE	PMI0235	7104221	7101031	529507.PMI3529	529507.PMI0235	0	0	0	0	0.063	0	0.952	0.142	0.958
metH	cysM	7103474	7102573	529507.PMI2758	529507.PMI1831	0.059	0	0	0	0.065	0	0.911	0.486	0.954
metH	cysK	7103474	7102569	529507.PMI2758	529507.PMI1827	0.059	0	0	0	0.065	0	0.911	0.486	0.954
PMI1275	PMI0028	7102021	7100830	529507.PMI1275	529507.PMI0028	0.381	0	0	0	0	0	0.912	0.177	0.951
PMI1275	PMI0626	7102021	7101410	529507.PMI1275	529507.PMI0626	0.381	0	0	0	0	0	0.912	0.177	0.951
metL	PMI1275	7103924	7102021	529507.PMI3224	529507.PMI1275	0	0	0	0	0	0	0.922	0.064	0.924
cysK	PMI1275	7102569	7102021	529507.PMI1827	529507.PMI1275	0.096	0	0	0	0	0	0.9	0.128	0.914
cysM	PMI1275	7102573	7102021	529507.PMI1831	529507.PMI1275	0.096	0	0	0	0	0	0.9	0.128	0.914
metL	PMI0235	7103924	7101031	529507.PMI3224	529507.PMI0235	0.099	0	0	0	0.129	0	0.8	0.431	0.898
metA	PMI0028	7103481	7100830	529507.PMI2765	529507.PMI0028	0.381	0	0.175	0	0.18	0	0.584	0.489	0.894
metA	PMI0626	7103481	7101410	529507.PMI2765	529507.PMI0626	0.381	0	0.16	0	0.18	0	0.584	0.489	0.892
metE	metL	7104221	7103924	529507.PMI3529	529507.PMI3224	0.061	0	0	0	0.151	0	0.8	0.407	0.892
metA	PMI0235	7103481	7101031	529507.PMI2765	529507.PMI0235	0.381	0	0	0	0	0	0.8	0.177	0.889
metE	cysK	7104221	7102569	529507.PMI3529	529507.PMI1827	0	0	0	0	0.063	0	0.862	0.19	0.886
metE	cysM	7104221	7102573	529507.PMI3529	529507.PMI1831	0	0	0	0	0.063	0	0.862	0.171	0.883
PMI0626	PMI0235	7101410	7101031	529507.PMI0626	529507.PMI0235	0.381	0.006	0.208	0	0.118	0.215	0.581	0.211	0.861
PMI0235	PMI0028	7101031	7100830	529507.PMI0235	529507.PMI0028	0.381	0.003	0.169	0	0.118	0.215	0.581	0.211	0.854
cysK	PMI0235	7102569	7101031	529507.PMI1827	529507.PMI0235	0	0	0.775	0.686	0	0	0.8	0	0.848
cysM	PMI0235	7102573	7101031	529507.PMI1831	529507.PMI0235	0	0	0.776	0.706	0	0	0.8	0	0.845
cysM	cysK	7102573	7102569	529507.PMI1831	529507.PMI1827	0	0	0.778	0.824	0	0	0.8	0.396	0.838
PMI0626	PMI0028	7101410	7100830	529507.PMI0626	529507.PMI0028	0	0	0.778	0.879	0	0	0.8	0	0.818
metA	metH	7103481	7103474	529507.PMI2765	529507.PMI2758	0.433	0	0	0	0	0	0	0.383	0.635
metA	cysM	7103481	7102573	529507.PMI2765	529507.PMI1831	0.381	0	0	0	0	0	0	0.29	0.541
metE	metA	7104221	7103481	529507.PMI3529	529507.PMI2765	0.06	0	0	0	0.177	0	0	0.452	0.539
metA	cysK	7103481	7102569	529507.PMI2765	529507.PMI1827	0.381	0	0	0	0	0	0	0.267	0.527
metL	cysK	7103924	7102569	529507.PMI3224	529507.PMI1827	0.099	0	0	0	0.129	0	0	0.431	0.514
metL	cysM	7103924	7102573	529507.PMI3224	529507.PMI1831	0.099	0	0	0	0.129	0	0	0.431	0.514
metL	thrA	7103924	7100803	529507.PMI3224	529507.PMI0001	0.478	0	0.777	0.691	0.927	0.897	0.947	0.494	0.999
metE	metB	7104221	7103923	529507.PMI3529	529507.PMI3223	0.302	0	0	0	0.129	0	0.965	0.807	0.995
metL	metB	7103924	7103923	529507.PMI3224	529507.PMI3223	0.908	0	0	0	0.475	0.119	0.8	0.475	0.994
metH	PMI2726	7103474	7103442	529507.PMI2758	529507.PMI2726	0.46	0	0	0	0	0	0.974	0.451	0.991
metB	cysM	7103923	7102573	529507.PMI3223	529507.PMI1831	0.381	0.003	0.158	0	0.118	0.215	0.965	0.365	0.99
metB	metH	7103923	7103474	529507.PMI3223	529507.PMI2758	0.303	0	0	0	0.063	0	0.974	0.495	0.99
metH	PMI0028	7103474	7100830	529507.PMI2758	529507.PMI0028	0.303	0	0	0	0.063	0	0.974	0.495	0.99
metH	PMI0626	7103474	7101410	529507.PMI2758	529507.PMI0626	0.303	0	0	0	0.063	0	0.974	0.495	0.99
metE	PMI0028	7104221	7100830	529507.PMI3529	529507.PMI0028	0.302	0	0	0	0.128	0	0.965	0.454	0.987
metE	PMI0626	7104221	7101410	529507.PMI3529	529507.PMI0626	0.302	0	0	0	0.128	0	0.965	0.454	0.987
cysM	PMI0626	7102573	7101410	529507.PMI1831	529507.PMI0626	0.381	0.002	0	0	0.118	0.215	0.956	0.299	0.984
cysM	PMI0028	7102573	7100830	529507.PMI1831	529507.PMI0028	0.381	0.001	0	0	0.118	0.215	0.956	0.299	0.984
metB	PMI1275	7103923	7102021	529507.PMI3223	529507.PMI1275	0.381	0	0	0	0	0	0.965	0.177	0.981
metE	metH	7104221	7103474	529507.PMI3529	529507.PMI2758	0.386	0	0	0	0.1	0	0.894	0.682	0.979
metB	PMI0626	7103923	7101410	529507.PMI3223	529507.PMI0626	0	0	0.778	0.721	0.083	0	0.965	0.639	0.978
metB	PMI0028	7103923	7100830	529507.PMI3223	529507.PMI0028	0	0	0.778	0.72	0.083	0	0.965	0.638	0.978
metL	metH	7103924	7103474	529507.PMI3224	529507.PMI2758	0.479	0	0	0	0.063	0	0.8	0.786	0.976
metH	thrA	7103474	7100803	529507.PMI2758	529507.PMI0001	0.479	0	0	0	0.063	0	0.8	0.786	0.976
metH	PMI1275	7103474	7102021	529507.PMI2758	529507.PMI1275	0	0	0	0	0	0	0.974	0.098	0.975
metE	PMI2726	7104221	7103442	529507.PMI3529	529507.PMI2726	0.133	0	0	0	0.149	0	0.965	0.12	0.974
PMI2726	PMI0028	7103442	7100830	529507.PMI2726	529507.PMI0028	0.117	0	0.704	0.677	0.084	0	0.956	0.177	0.971
PMI2726	PMI0626	7103442	7101410	529507.PMI2726	529507.PMI0626	0.117	0	0.736	0.683	0.084	0	0.956	0.177	0.971
metB	PMI2726	7103923	7103442	529507.PMI3223	529507.PMI2726	0.117	0	0.775	0.796	0.064	0	0.956	0.231	0.968
metL	PMI0028	7103924	7100830	529507.PMI3224	529507.PMI0028	0.433	0	0	0	0.475	0.119	0.8	0.475	0.967
metB	thrA	7103923	7100803	529507.PMI3223	529507.PMI0001	0.433	0	0	0	0.475	0.119	0.8	0.475	0.967
metL	PMI0626	7103924	7101410	529507.PMI3224	529507.PMI0626	0.433	0	0	0	0.475	0.119	0.8	0.475	0.967
PMI0028	thrA	7100830	7100803	529507.PMI0028	529507.PMI0001	0.433	0	0	0	0.475	0.119	0.8	0.475	0.967
metE	PMI1275	7104221	7102021	529507.PMI3529	529507.PMI1275	0.061	0	0	0	0	0	0.965	0.071	0.967
PMI0626	thrA	7101410	7100803	529507.PMI0626	529507.PMI0001	0.433	0	0	0	0.475	0.119	0.8	0.475	0.967
PMI2726	PMI1275	7103442	7102021	529507.PMI2726	529507.PMI1275	0.064	0	0.151	0	0	0	0.956	0.061	0.963
metL	PMI2726	7103924	7103442	529507.PMI3224	529507.PMI2726	0.438	0	0	0	0.061	0	0.914	0.129	0.955
PMI2726	thrA	7103442	7100803	529507.PMI2726	529507.PMI0001	0.438	0	0	0	0.061	0	0.914	0.129	0.955
PMI1275	PMI1274	7102021	7102020	529507.PMI1275	529507.PMI1274	0.89	0	0.362	0	0	0	0	0.416	0.955
metH	cysM	7103474	7102573	529507.PMI2758	529507.PMI1831	0.059	0	0	0	0.065	0	0.911	0.486	0.954
PMI1275	PMI0028	7102021	7100830	529507.PMI1275	529507.PMI0028	0.381	0	0	0	0	0	0.912	0.177	0.951
PMI1275	PMI0626	7102021	7101410	529507.PMI1275	529507.PMI0626	0.381	0	0	0	0	0	0.912	0.177	0.951
PMI2726	cysM	7103442	7102573	529507.PMI2726	529507.PMI1831	0.381	0.001	0	0	0.062	0	0.912	0.147	0.95
PMI1275	thrA	7102021	7100803	529507.PMI1275	529507.PMI0001	0	0	0	0	0	0	0.922	0.064	0.924
metL	PMI1275	7103924	7102021	529507.PMI3224	529507.PMI1275	0	0	0	0	0	0	0.922	0.064	0.924
cysM	PMI1275	7102573	7102021	529507.PMI1831	529507.PMI1275	0.096	0	0	0	0	0	0.9	0.128	0.914
metE	thrA	7104221	7100803	529507.PMI3529	529507.PMI0001	0.061	0	0	0	0.151	0	0.8	0.407	0.892
metE	metL	7104221	7103924	529507.PMI3529	529507.PMI3224	0.061	0	0	0	0.151	0	0.8	0.407	0.892
metE	cysM	7104221	7102573	529507.PMI3529	529507.PMI1831	0	0	0	0	0.063	0	0.862	0.171	0.883
PMI0626	PMI0028	7101410	7100830	529507.PMI0626	529507.PMI0028	0	0	0.778	0.879	0	0	0.8	0	0.818
cysM	thrA	7102573	7100803	529507.PMI1831	529507.PMI0001	0.099	0	0	0	0.129	0	0	0.431	0.514
metL	cysM	7103924	7102573	529507.PMI3224	529507.PMI1831	0.099	0	0	0	0.129	0	0	0.431	0.514
dadA	dadB	7102255	7102254	529507.PMI1509	529507.PMI1508	0.884	0	0	0	0.487	0	0.673	0.566	0.99
alr	dadA	7103458	7102255	529507.PMI2742	529507.PMI1509	0.371	0	0	0	0.487	0	0.673	0.509	0.941
dadA	aspC	7102255	7101544	529507.PMI1509	529507.PMI0764	0	0	0	0	0.062	0	0.9	0	0.902
tyrB	dadA	7103459	7102255	529507.PMI2743	529507.PMI1509	0	0	0	0	0.062	0	0.9	0	0.902
dadA	hisC	7102255	7101445	529507.PMI1509	529507.PMI0663	0	0	0	0	0.062	0	0.9	0	0.902
dadA	PMI1463	7102255	7102209	529507.PMI1509	529507.PMI1463	0	0	0	0	0.062	0	0.9	0	0.902
PMI1774	dadA	7102519	7102255	529507.PMI1774	529507.PMI1509	0.371	0	0	0	0.458	0	0.587	0.18	0.869
alr	PMI1774	7103458	7102519	529507.PMI2742	529507.PMI1774	0	0	0.701	0.63	0	0	0.8	0.109	0.854
PMI1774	dadB	7102519	7102254	529507.PMI1774	529507.PMI1508	0	0	0.707	0.653	0	0	0.8	0.109	0.851
tyrB	hisC	7103459	7101445	529507.PMI2743	529507.PMI0663	0	0	0	0	0.063	0	0.8	0.224	0.841
PMI1463	hisC	7102209	7101445	529507.PMI1463	529507.PMI0663	0	0	0.393	0.642	0	0	0.8	0	0.826
aspC	hisC	7101544	7101445	529507.PMI0764	529507.PMI0663	0	0	0	0	0.063	0	0.8	0.128	0.822
alr	dadB	7103458	7102254	529507.PMI2742	529507.PMI1508	0	0	0.778	0.876	0	0	0.8	0	0.819
PMI1463	aspC	7102209	7101544	529507.PMI1463	529507.PMI0764	0	0	0	0	0.063	0	0.8	0.114	0.819
tyrB	PMI1463	7103459	7102209	529507.PMI2743	529507.PMI1463	0	0	0	0	0.063	0	0.8	0.114	0.819
tyrB	aspC	7103459	7101544	529507.PMI2743	529507.PMI0764	0	0	0.778	0.902	0	0	0.8	0.185	0.817
gcvP	dadA	7102757	7102255	529507.PMI2019	529507.PMI1509	0	0	0	0	0.06	0	0.752	0.252	0.81
dadA	PMI1162	7102255	7101910	529507.PMI1509	529507.PMI1162	0.381	0.305	0.511	0	0.103	0	0	0	0.786
dadB	hypF	7102254	7102253	529507.PMI1508	529507.PMI1507	0.692	0	0	0	0	0	0	0	0.692
tyrB	alr	7103459	7103458	529507.PMI2743	529507.PMI2742	0.676	0	0	0	0	0	0	0	0.676
dadA	hypF	7102255	7102253	529507.PMI1509	529507.PMI1507	0.667	0	0	0	0	0	0	0	0.667
cysJ	cysI	7102983	7102982	529507.PMI2250	529507.PMI2249	0.89	0.233	0.778	0	0.837	0.494	0.931	0.811	0.999
metE	metB	7104221	7103923	529507.PMI3529	529507.PMI3223	0.302	0	0	0	0.129	0	0.965	0.807	0.995
metH	PMI2726	7103474	7103442	529507.PMI2758	529507.PMI2726	0.46	0	0	0	0	0	0.974	0.451	0.991
metH	PMI0626	7103474	7101410	529507.PMI2758	529507.PMI0626	0.303	0	0	0	0.063	0	0.974	0.495	0.99
metB	metH	7103923	7103474	529507.PMI3223	529507.PMI2758	0.303	0	0	0	0.063	0	0.974	0.495	0.99
metB	PMI0235	7103923	7101031	529507.PMI3223	529507.PMI0235	0.381	0.008	0.31	0	0.118	0.215	0.963	0.278	0.99
metH	PMI0028	7103474	7100830	529507.PMI2758	529507.PMI0028	0.303	0	0	0	0.063	0	0.974	0.495	0.99
metE	PMI0626	7104221	7101410	529507.PMI3529	529507.PMI0626	0.302	0	0	0	0.128	0	0.965	0.454	0.987
metE	PMI0028	7104221	7100830	529507.PMI3529	529507.PMI0028	0.302	0	0	0	0.128	0	0.965	0.454	0.987
metB	PMI1275	7103923	7102021	529507.PMI3223	529507.PMI1275	0.381	0	0	0	0	0	0.965	0.177	0.981
metE	metH	7104221	7103474	529507.PMI3529	529507.PMI2758	0.386	0	0	0	0.1	0	0.894	0.682	0.979
metB	PMI0028	7103923	7100830	529507.PMI3223	529507.PMI0028	0	0	0.778	0.72	0.083	0	0.965	0.638	0.978
metB	PMI0626	7103923	7101410	529507.PMI3223	529507.PMI0626	0	0	0.778	0.721	0.083	0	0.965	0.639	0.978
metH	PMI0235	7103474	7101031	529507.PMI2758	529507.PMI0235	0.059	0	0	0	0.065	0	0.955	0.486	0.977
metH	PMI1275	7103474	7102021	529507.PMI2758	529507.PMI1275	0	0	0	0	0	0	0.974	0.098	0.975
PMI2726	PMI0235	7103442	7101031	529507.PMI2726	529507.PMI0235	0.381	0.003	0	0	0.062	0	0.956	0.147	0.975
metE	PMI2726	7104221	7103442	529507.PMI3529	529507.PMI2726	0.133	0	0	0	0.149	0	0.965	0.12	0.974
PMI2726	cysI	7103442	7102982	529507.PMI2726	529507.PMI2249	0.091	0	0	0	0.157	0	0.965	0.109	0.973
metB	cysI	7103923	7102982	529507.PMI3223	529507.PMI2249	0.063	0	0	0	0.081	0.122	0.956	0.293	0.972
PMI2726	PMI0028	7103442	7100830	529507.PMI2726	529507.PMI0028	0.117	0	0.704	0.677	0.084	0	0.956	0.177	0.971
PMI2726	cysJ	7103442	7102983	529507.PMI2726	529507.PMI2250	0.043	0	0	0	0.201	0	0.965	0	0.971
PMI2726	PMI0626	7103442	7101410	529507.PMI2726	529507.PMI0626	0.117	0	0.736	0.683	0.084	0	0.956	0.177	0.971
metB	PMI2726	7103923	7103442	529507.PMI3223	529507.PMI2726	0.117	0	0.775	0.796	0.064	0	0.956	0.231	0.968
metE	PMI1275	7104221	7102021	529507.PMI3529	529507.PMI1275	0.061	0	0	0	0	0	0.965	0.071	0.967
cysJ	PMI0794	7102983	7101571	529507.PMI2250	529507.PMI0794	0	0	0	0	0	0	0.965	0	0.965
cysI	PMI0794	7102982	7101571	529507.PMI2249	529507.PMI0794	0	0	0	0	0	0	0.965	0	0.965
PMI2726	PMI1275	7103442	7102021	529507.PMI2726	529507.PMI1275	0.064	0	0.151	0	0	0	0.956	0.061	0.963
metB	cysJ	7103923	7102983	529507.PMI3223	529507.PMI2250	0.043	0	0	0	0.076	0	0.956	0.069	0.959
metE	PMI0235	7104221	7101031	529507.PMI3529	529507.PMI0235	0	0	0	0	0.063	0	0.952	0.142	0.958
PMI2726	PMI0794	7103442	7101571	529507.PMI2726	529507.PMI0794	0	0	0	0	0	0	0.956	0	0.956
PMI1275	PMI0028	7102021	7100830	529507.PMI1275	529507.PMI0028	0.381	0	0	0	0	0	0.912	0.177	0.951
PMI1275	PMI0626	7102021	7101410	529507.PMI1275	529507.PMI0626	0.381	0	0	0	0	0	0.912	0.177	0.951
PMI0626	PMI0235	7101410	7101031	529507.PMI0626	529507.PMI0235	0.381	0.006	0.208	0	0.118	0.215	0.581	0.211	0.861
PMI0235	PMI0028	7101031	7100830	529507.PMI0235	529507.PMI0028	0.381	0.003	0.169	0	0.118	0.215	0.581	0.211	0.854
cysI	PMI0235	7102982	7101031	529507.PMI2249	529507.PMI0235	0.304	0	0	0	0.228	0	0.584	0.368	0.839
metH	cysJ	7103474	7102983	529507.PMI2758	529507.PMI2250	0	0	0	0	0.065	0.215	0.752	0.171	0.828
PMI0626	PMI0028	7101410	7100830	529507.PMI0626	529507.PMI0028	0	0	0.778	0.879	0	0	0.8	0	0.818
cysI	PMI0028	7102982	7100830	529507.PMI2249	529507.PMI0028	0.063	0	0	0	0.081	0.122	0.581	0.422	0.783
cysI	PMI0626	7102982	7101410	529507.PMI2249	529507.PMI0626	0.063	0	0	0	0.081	0.122	0.581	0.422	0.783
cysJ	PMI0235	7102983	7101031	529507.PMI2250	529507.PMI0235	0.092	0	0	0	0.225	0.125	0.584	0.129	0.736
cysJ	PMI0626	7102983	7101410	529507.PMI2250	529507.PMI0626	0.043	0	0	0	0.076	0	0.581	0.227	0.675
cysJ	PMI0028	7102983	7100830	529507.PMI2250	529507.PMI0028	0.043	0	0	0	0.076	0	0.581	0.227	0.675
metE	cysI	7104221	7102982	529507.PMI3529	529507.PMI2249	0	0	0	0	0.576	0	0	0.147	0.622
metE	cysJ	7104221	7102983	529507.PMI3529	529507.PMI2250	0	0	0	0	0.457	0	0	0.07	0.473
arcA	PMI3678	7104409	7104368	529507.PMI3719	529507.PMI3678	0.395	0	0.667	0	0.126	0.834	0.8	0.786	0.998
fadB	fadJ	7104241	7102551	529507.PMI3550	529507.PMI1807	0.478	0	0.778	0.757	0.484	0.461	0.974	0.495	0.996
rcsC	rcsD	7102477	7102475	529507.PMI1731	529507.PMI1729	0	0	0.766	0.606	0.063	0.945	0.8	0.748	0.994
PMI3678	rcsD	7104368	7102475	529507.PMI3678	529507.PMI1729	0	0	0.501	0	0.063	0.945	0	0.592	0.988
PMI3678	phoB	7104368	7100853	529507.PMI3678	529507.PMI0051	0.395	0.075	0.363	0	0.126	0.834	0.1	0.786	0.987
fadJ	rcsC	7102551	7102477	529507.PMI1807	529507.PMI1731	0.044	0	0	0	0.177	0.82	0.752	0.665	0.986
PMI3678	fadJ	7104368	7102551	529507.PMI3678	529507.PMI1807	0.044	0	0	0	0.201	0.82	0.752	0.665	0.986
fadB	rcsC	7104241	7102477	529507.PMI3550	529507.PMI1731	0.044	0	0	0	0.177	0.82	0.752	0.665	0.986
PMI3678	fadB	7104368	7104241	529507.PMI3678	529507.PMI3550	0.044	0	0	0	0.201	0.82	0.752	0.665	0.986
PMI3678	rcsC	7104368	7102477	529507.PMI3678	529507.PMI1731	0.409	0	0.663	0.614	0.273	0.945	0	0.786	0.986
PMI3678	phoQ	7104368	7101656	529507.PMI3678	529507.PMI0884	0.109	0	0.226	0	0.128	0.941	0	0.654	0.985
PMI3678	cpxR	7104368	7103900	529507.PMI3678	529507.PMI3199	0.395	0.025	0.349	0	0.126	0.834	0.043	0.786	0.985
PMI3678	kdpE	7104368	7101973	529507.PMI3678	529507.PMI1226	0.395	0.001	0.313	0	0.126	0.834	0.043	0.786	0.984
PMI3678	baeR	7104368	7102335	529507.PMI3678	529507.PMI1589	0.395	0.011	0.294	0	0.126	0.834	0.043	0.786	0.984
rcsC	kdpE	7102477	7101973	529507.PMI1731	529507.PMI1226	0.383	0	0.626	0	0.126	0.454	0.043	0.495	0.934
cpxR	rcsC	7103900	7102477	529507.PMI3199	529507.PMI1731	0.383	0.006	0.59	0	0.126	0.454	0.043	0.495	0.928
phoQ	phoB	7101656	7100853	529507.PMI0884	529507.PMI0051	0.38	0.001	0.362	0	0.126	0.42	0.043	0.642	0.915
rcsC	phoQ	7102477	7101656	529507.PMI1731	529507.PMI0884	0.109	0	0.723	0	0.127	0.583	0	0.173	0.912
rcsD	phoQ	7102475	7101656	529507.PMI1729	529507.PMI0884	0	0	0.484	0	0.058	0.681	0	0.413	0.896
cpxR	phoQ	7103900	7101656	529507.PMI3199	529507.PMI0884	0.38	0.001	0.556	0	0.126	0.42	0.043	0.281	0.881
baeR	phoQ	7102335	7101656	529507.PMI1589	529507.PMI0884	0.38	0	0.539	0	0.126	0.42	0.043	0.296	0.879
fadJ	phoQ	7102551	7101656	529507.PMI1807	529507.PMI0884	0	0	0	0	0.154	0.407	0.752	0.128	0.876
fadB	phoQ	7104241	7101656	529507.PMI3550	529507.PMI0884	0	0	0	0	0.154	0.407	0.752	0.128	0.876
arcA	rcsC	7104409	7102477	529507.PMI3719	529507.PMI1731	0.383	0	0.288	0	0.126	0.454	0.043	0.495	0.875
arcA	cpxR	7104409	7103900	529507.PMI3719	529507.PMI3199	0	0	0.777	0.781	0	0.802	0	0.073	0.836
kdpE	phoQ	7101973	7101656	529507.PMI1226	529507.PMI0884	0.38	0	0.399	0	0.126	0.42	0.043	0.109	0.801
rcsC	baeR	7102477	7102335	529507.PMI1731	529507.PMI1589	0.383	0.002	0.608	0.632	0.126	0.454	0.043	0.495	0.793
rcsC	phoB	7102477	7100853	529507.PMI1731	529507.PMI0051	0.383	0.005	0.33	0.63	0.126	0.454	0.1	0.495	0.779
arcA	phoQ	7104409	7101656	529507.PMI3719	529507.PMI0884	0.38	0	0.28	0	0.126	0.42	0.043	0.109	0.762
arcA	fadB	7104409	7104241	529507.PMI3719	529507.PMI3550	0	0	0	0	0	0	0.7	0.113	0.722
cpxR	fadJ	7103900	7102551	529507.PMI3199	529507.PMI1807	0	0	0	0	0	0	0.7	0.113	0.722
fadB	phoB	7104241	7100853	529507.PMI3550	529507.PMI0051	0	0	0	0	0	0	0.7	0.113	0.722
fadB	baeR	7104241	7102335	529507.PMI3550	529507.PMI1589	0	0	0	0	0	0	0.7	0.113	0.722
fadJ	baeR	7102551	7102335	529507.PMI1807	529507.PMI1589	0	0	0	0	0	0	0.7	0.113	0.722
fadB	kdpE	7104241	7101973	529507.PMI3550	529507.PMI1226	0	0	0	0	0	0	0.7	0.113	0.722
arcA	fadJ	7104409	7102551	529507.PMI3719	529507.PMI1807	0	0	0	0	0	0	0.7	0.113	0.722
fadB	cpxR	7104241	7103900	529507.PMI3550	529507.PMI3199	0	0	0	0	0	0	0.7	0.113	0.722
fadJ	kdpE	7102551	7101973	529507.PMI1807	529507.PMI1226	0	0	0	0	0	0	0.7	0.113	0.722
fadJ	phoB	7102551	7100853	529507.PMI1807	529507.PMI0051	0	0	0	0	0	0	0.7	0.113	0.722
arcA	baeR	7104409	7102335	529507.PMI3719	529507.PMI1589	0	0	0.771	0.792	0	0.461	0	0	0.546
rcsD	kdpE	7102475	7101973	529507.PMI1729	529507.PMI1226	0	0	0	0	0	0.398	0	0.11	0.441
cpxR	rcsD	7103900	7102475	529507.PMI3199	529507.PMI1729	0.042	0	0	0	0	0.398	0	0.107	0.44
rcsD	phoB	7102475	7100853	529507.PMI1729	529507.PMI0051	0	0	0	0	0	0.398	0	0.064	0.413
rcsD	baeR	7102475	7102335	529507.PMI1729	529507.PMI1589	0.042	0	0	0	0	0.398	0	0.061	0.411
arcA	rcsD	7104409	7102475	529507.PMI3719	529507.PMI1729	0	0	0	0	0	0.398	0	0.061	0.41
metE	metB	7104221	7103923	529507.PMI3529	529507.PMI3223	0.302	0	0	0	0.129	0	0.965	0.807	0.995
metH	PMI2726	7103474	7103442	529507.PMI2758	529507.PMI2726	0.46	0	0	0	0	0	0.974	0.451	0.991
metB	metH	7103923	7103474	529507.PMI3223	529507.PMI2758	0.303	0	0	0	0.063	0	0.974	0.495	0.99
cysE	PMI0235	7103886	7101031	529507.PMI3185	529507.PMI0235	0.381	0	0.438	0	0.069	0.462	0.929	0.381	0.99
metB	PMI0235	7103923	7101031	529507.PMI3223	529507.PMI0235	0.381	0.008	0.31	0	0.118	0.215	0.963	0.278	0.99
metH	luxS	7103474	7101166	529507.PMI2758	529507.PMI0379	0.381	0	0	0	0	0	0.974	0.176	0.985
metE	metH	7104221	7103474	529507.PMI3529	529507.PMI2758	0.386	0	0	0	0.1	0	0.894	0.682	0.979
metE	luxS	7104221	7101166	529507.PMI3529	529507.PMI0379	0.302	0	0	0	0	0	0.965	0.186	0.978
metH	PMI0235	7103474	7101031	529507.PMI2758	529507.PMI0235	0.059	0	0	0	0.065	0	0.955	0.486	0.977
PMI2726	PMI0235	7103442	7101031	529507.PMI2726	529507.PMI0235	0.381	0.003	0	0	0.062	0	0.956	0.147	0.975
metE	PMI2726	7104221	7103442	529507.PMI3529	529507.PMI2726	0.133	0	0	0	0.149	0	0.965	0.12	0.974
PMI0234	PMI0232	7101030	7101028	529507.PMI0234	529507.PMI0232	0.869	0	0.771	0	0.063	0	0	0.063	0.97
PMI0239	PMI0235	7101035	7101031	529507.PMI0239	529507.PMI0235	0.844	0	0.703	0	0	0	0.392	0.072	0.97
metB	PMI2726	7103923	7103442	529507.PMI3223	529507.PMI2726	0.117	0	0.775	0.796	0.064	0	0.956	0.231	0.968
PMI0235	PMI0234	7101031	7101030	529507.PMI0235	529507.PMI0234	0.888	0	0.703	0	0.06	0	0	0.071	0.967
PMI0236	PMI0235	7101032	7101031	529507.PMI0236	529507.PMI0235	0.863	0	0.767	0	0	0	0	0	0.966
PMI0236	PMI0234	7101032	7101030	529507.PMI0236	529507.PMI0234	0.849	0	0.771	0	0	0	0	0	0.964
PMI0239	PMI0236	7101035	7101032	529507.PMI0239	529507.PMI0236	0.843	0	0.778	0	0	0	0	0	0.963
metE	PMI0235	7104221	7101031	529507.PMI3529	529507.PMI0235	0	0	0	0	0.063	0	0.952	0.142	0.958
PMI0236	PMI0232	7101032	7101028	529507.PMI0236	529507.PMI0232	0.802	0	0.776	0	0	0	0	0	0.954
PMI0239	PMI0234	7101035	7101030	529507.PMI0239	529507.PMI0234	0.827	0	0.727	0	0.089	0	0	0	0.953
PMI0239	PMI0232	7101035	7101028	529507.PMI0239	529507.PMI0232	0.786	0	0.774	0	0.061	0	0	0	0.95
metB	luxS	7103923	7101166	529507.PMI3223	529507.PMI0379	0.381	0	0	0	0	0	0.9	0.224	0.947
luxS	PMI0235	7101166	7101031	529507.PMI0379	529507.PMI0235	0.322	0	0	0	0	0	0.9	0.21	0.941
PMI0235	PMI0232	7101031	7101028	529507.PMI0235	529507.PMI0232	0.798	0	0.705	0	0	0	0	0	0.938
PMI2726	luxS	7103442	7101166	529507.PMI2726	529507.PMI0379	0.043	0	0	0	0	0	0.9	0	0.9
metB	cysE	7103923	7103886	529507.PMI3223	529507.PMI3185	0.381	0	0	0	0	0	0.339	0.46	0.76
cysE	PMI2726	7103886	7103442	529507.PMI3185	529507.PMI2726	0.095	0	0	0	0	0	0.673	0.129	0.719
metE	cysE	7104221	7103886	529507.PMI3529	529507.PMI3185	0	0	0	0	0	0	0	0.406	0.406
cysJ	cysI	7102983	7102982	529507.PMI2250	529507.PMI2249	0.89	0.233	0.778	0	0.837	0.494	0.931	0.811	0.999
cysE	cysM	7103886	7102573	529507.PMI3185	529507.PMI1831	0.381	0	0.57	0	0.069	0.586	0.965	0.748	0.998
cysI	cysM	7102982	7102573	529507.PMI2249	529507.PMI1831	0.304	0	0	0	0.228	0	0.965	0.724	0.994
metH	PMI0626	7103474	7101410	529507.PMI2758	529507.PMI0626	0.303	0	0	0	0.063	0	0.974	0.495	0.99
metH	PMI0028	7103474	7100830	529507.PMI2758	529507.PMI0028	0.303	0	0	0	0.063	0	0.974	0.495	0.99
metB	cysM	7103923	7102573	529507.PMI3223	529507.PMI1831	0.381	0.003	0.158	0	0.118	0.215	0.965	0.365	0.99
metB	metH	7103923	7103474	529507.PMI3223	529507.PMI2758	0.303	0	0	0	0.063	0	0.974	0.495	0.99
PMI3186	cysM	7103887	7102573	529507.PMI3186	529507.PMI1831	0.381	0	0.321	0	0.069	0.461	0.955	0.109	0.989
cysJ	cysM	7102983	7102573	529507.PMI2250	529507.PMI1831	0.092	0	0	0	0.225	0.125	0.965	0.526	0.988
cysM	PMI0028	7102573	7100830	529507.PMI1831	529507.PMI0028	0.381	0.001	0	0	0.118	0.215	0.956	0.299	0.984
cysM	PMI0626	7102573	7101410	529507.PMI1831	529507.PMI0626	0.381	0.002	0	0	0.118	0.215	0.956	0.299	0.984
metB	PMI0626	7103923	7101410	529507.PMI3223	529507.PMI0626	0	0	0.778	0.721	0.083	0	0.965	0.639	0.978
metB	PMI0028	7103923	7100830	529507.PMI3223	529507.PMI0028	0	0	0.778	0.72	0.083	0	0.965	0.638	0.978
metB	cysI	7103923	7102982	529507.PMI3223	529507.PMI2249	0.063	0	0	0	0.081	0.122	0.956	0.293	0.972
cysM	PMI0794	7102573	7101571	529507.PMI1831	529507.PMI0794	0	0	0	0	0	0	0.965	0	0.965
cysI	PMI0794	7102982	7101571	529507.PMI2249	529507.PMI0794	0	0	0	0	0	0	0.965	0	0.965
cysJ	PMI0794	7102983	7101571	529507.PMI2250	529507.PMI0794	0	0	0	0	0	0	0.965	0	0.965
cysI	phsA	7102982	7102558	529507.PMI2249	529507.PMI1814	0.131	0	0	0	0	0	0.951	0.158	0.961
cysM	phsA	7102573	7102558	529507.PMI1831	529507.PMI1814	0	0	0	0	0	0	0.951	0.236	0.961
metB	cysJ	7103923	7102983	529507.PMI3223	529507.PMI2250	0.043	0	0	0	0.076	0	0.956	0.069	0.959
PMI3186	cysE	7103887	7103886	529507.PMI3186	529507.PMI3185	0.859	0	0.72	0	0	0	0	0	0.958
metH	cysM	7103474	7102573	529507.PMI2758	529507.PMI1831	0.059	0	0	0	0.065	0	0.911	0.486	0.954
phsA	PMI0794	7102558	7101571	529507.PMI1814	529507.PMI0794	0	0	0	0	0	0	0.947	0	0.947
cysJ	phsA	7102983	7102558	529507.PMI2250	529507.PMI1814	0.101	0.003	0	0	0	0	0.9	0.389	0.94
metB	phsA	7103923	7102558	529507.PMI3223	529507.PMI1814	0	0	0	0	0	0	0.9	0	0.9
metH	cysJ	7103474	7102983	529507.PMI2758	529507.PMI2250	0	0	0	0	0.065	0.215	0.752	0.171	0.828
PMI0626	PMI0028	7101410	7100830	529507.PMI0626	529507.PMI0028	0	0	0.778	0.879	0	0	0.8	0	0.818
cysI	PMI0626	7102982	7101410	529507.PMI2249	529507.PMI0626	0.063	0	0	0	0.081	0.122	0.581	0.422	0.783
cysI	PMI0028	7102982	7100830	529507.PMI2249	529507.PMI0028	0.063	0	0	0	0.081	0.122	0.581	0.422	0.783
metB	cysE	7103923	7103886	529507.PMI3223	529507.PMI3185	0.381	0	0	0	0	0	0.339	0.46	0.76
cysE	PMI0626	7103886	7101410	529507.PMI3185	529507.PMI0626	0.381	0	0	0	0	0	0.244	0.461	0.726
cysE	PMI0028	7103886	7100830	529507.PMI3185	529507.PMI0028	0.381	0	0	0	0	0	0.244	0.46	0.725
cysJ	PMI0028	7102983	7100830	529507.PMI2250	529507.PMI0028	0.043	0	0	0	0.076	0	0.581	0.227	0.675
cysJ	PMI0626	7102983	7101410	529507.PMI2250	529507.PMI0626	0.043	0	0	0	0.076	0	0.581	0.227	0.675
cysE	cysI	7103886	7102982	529507.PMI3185	529507.PMI2249	0.121	0	0	0	0.048	0	0	0.595	0.631
cysE	cysJ	7103886	7102983	529507.PMI3185	529507.PMI2250	0.1	0	0	0	0	0	0	0.482	0.514
PMI3186	PMI0626	7103887	7101410	529507.PMI3186	529507.PMI0626	0.381	0	0	0	0	0	0.105	0.109	0.463
PMI3186	PMI0028	7103887	7100830	529507.PMI3186	529507.PMI0028	0.381	0	0	0	0	0	0.105	0.109	0.463
metB	PMI3186	7103923	7103887	529507.PMI3223	529507.PMI3186	0.381	0	0	0	0	0	0.105	0.109	0.463
metF	metH	7103648	7103474	529507.PMI2932	529507.PMI2758	0.478	0	0	0	0.641	0	0.974	0.587	0.997
metE	metK	7104221	7102829	529507.PMI3529	529507.PMI2095	0.06	0	0	0	0.661	0.213	0.965	0.632	0.996
metH	metK	7103474	7102829	529507.PMI2758	529507.PMI2095	0.407	0	0	0	0.127	0	0.974	0.495	0.992
metE	PMI1248	7104221	7101994	529507.PMI3529	529507.PMI1248	0.302	0	0	0	0.129	0	0.965	0.638	0.991
metH	PMI1248	7103474	7101994	529507.PMI2758	529507.PMI1248	0.303	0	0	0	0.063	0	0.974	0.495	0.99
metE	metF	7104221	7103648	529507.PMI3529	529507.PMI2932	0.381	0	0.311	0	0.819	0.123	0.581	0.72	0.99
metE	metH	7104221	7103474	529507.PMI3529	529507.PMI2758	0.386	0	0	0	0.1	0	0.894	0.682	0.979
metK	PMI1248	7102829	7101994	529507.PMI2095	529507.PMI1248	0.044	0	0	0	0.114	0.454	0.9	0.567	0.976
metH	cysK	7103474	7102569	529507.PMI2758	529507.PMI1827	0.059	0	0	0	0.065	0	0.911	0.486	0.954
metH	cysM	7103474	7102573	529507.PMI2758	529507.PMI1831	0.059	0	0	0	0.065	0	0.911	0.486	0.954
metA	PMI1248	7103481	7101994	529507.PMI2765	529507.PMI1248	0.381	0	0.223	0	0.393	0	0.673	0.564	0.95
metE	metG	7104221	7101430	529507.PMI3529	529507.PMI0646	0	0	0	0	0.063	0.119	0.9	0.309	0.935
metF	PMI1248	7103648	7101994	529507.PMI2932	529507.PMI1248	0.381	0	0	0	0.48	0.215	0.539	0.47	0.927
metH	metG	7103474	7101430	529507.PMI2758	529507.PMI0646	0	0	0	0	0.071	0	0.9	0.126	0.911
PMI1248	metG	7101994	7101430	529507.PMI1248	529507.PMI0646	0.052	0	0	0	0.061	0	0.9	0.125	0.911
metE	tyrB	7104221	7103459	529507.PMI3529	529507.PMI2743	0	0	0	0	0.063	0	0.9	0.11	0.909
PMI1248	trxB	7101994	7101477	529507.PMI1248	529507.PMI0695	0	0	0	0	0.088	0	0.9	0.075	0.908
cysM	PMI1248	7102573	7101994	529507.PMI1831	529507.PMI1248	0.381	0.001	0.152	0	0.118	0.215	0.673	0.365	0.906
tyrB	PMI1248	7103459	7101994	529507.PMI2743	529507.PMI1248	0	0	0	0	0.069	0	0.9	0	0.902
metH	tyrB	7103474	7103459	529507.PMI2758	529507.PMI2743	0	0	0	0	0.051	0	0.9	0	0.901
tyrB	metK	7103459	7102829	529507.PMI2743	529507.PMI2095	0	0	0	0	0	0	0.9	0	0.9
cysK	PMI1248	7102569	7101994	529507.PMI1827	529507.PMI1248	0.381	0	0	0	0.118	0.215	0.673	0.365	0.894
metE	cysK	7104221	7102569	529507.PMI3529	529507.PMI1827	0	0	0	0	0.063	0	0.862	0.19	0.886
metF	metK	7103648	7102829	529507.PMI2932	529507.PMI2095	0.381	0	0	0	0.341	0	0.539	0.462	0.885
metE	cysM	7104221	7102573	529507.PMI3529	529507.PMI1831	0	0	0	0	0.063	0	0.862	0.171	0.883
cysM	cysK	7102573	7102569	529507.PMI1831	529507.PMI1827	0	0	0.778	0.824	0	0	0.8	0.396	0.838
metF	metA	7103648	7103481	529507.PMI2932	529507.PMI2765	0.064	0	0	0	0.482	0	0	0.42	0.694
metA	metH	7103481	7103474	529507.PMI2765	529507.PMI2758	0.433	0	0	0	0	0	0	0.383	0.635
metK	metG	7102829	7101430	529507.PMI2095	529507.PMI0646	0.092	0	0	0	0.134	0	0	0.558	0.622
trxB	metG	7101477	7101430	529507.PMI0695	529507.PMI0646	0.06	0	0.244	0	0.095	0.182	0	0.386	0.618
metA	cysM	7103481	7102573	529507.PMI2765	529507.PMI1831	0.381	0	0	0	0	0	0	0.29	0.541
metE	metA	7104221	7103481	529507.PMI3529	529507.PMI2765	0.06	0	0	0	0.177	0	0	0.452	0.539
metA	cysK	7103481	7102569	529507.PMI2765	529507.PMI1827	0.381	0	0	0	0	0	0	0.267	0.527
metF	metH	7103648	7103474	529507.PMI2932	529507.PMI2758	0.478	0	0	0	0.641	0	0.974	0.587	0.997
metE	metK	7104221	7102829	529507.PMI3529	529507.PMI2095	0.06	0	0	0	0.661	0.213	0.965	0.632	0.996
metH	metK	7103474	7102829	529507.PMI2758	529507.PMI2095	0.407	0	0	0	0.127	0	0.974	0.495	0.992
metE	mdeA	7104221	7102987	529507.PMI3529	529507.PMI2254	0.302	0	0	0	0.129	0	0.965	0.638	0.991
metE	metF	7104221	7103648	529507.PMI3529	529507.PMI2932	0.381	0	0.311	0	0.819	0.123	0.581	0.72	0.99
metH	mdeA	7103474	7102987	529507.PMI2758	529507.PMI2254	0.303	0	0	0	0.063	0	0.974	0.495	0.99
metE	metH	7104221	7103474	529507.PMI3529	529507.PMI2758	0.386	0	0	0	0.1	0	0.894	0.682	0.979
mdeA	metK	7102987	7102829	529507.PMI2254	529507.PMI2095	0.044	0	0	0	0.114	0.454	0.9	0.567	0.976
metH	cysM	7103474	7102573	529507.PMI2758	529507.PMI1831	0.059	0	0	0	0.065	0	0.911	0.486	0.954
metH	cysK	7103474	7102569	529507.PMI2758	529507.PMI1827	0.059	0	0	0	0.065	0	0.911	0.486	0.954
metA	mdeA	7103481	7102987	529507.PMI2765	529507.PMI2254	0.381	0	0.166	0	0.393	0	0.673	0.564	0.947
metE	metG	7104221	7101430	529507.PMI3529	529507.PMI0646	0	0	0	0	0.063	0.119	0.9	0.309	0.935
metF	mdeA	7103648	7102987	529507.PMI2932	529507.PMI2254	0.381	0	0	0	0.48	0.215	0.539	0.47	0.927
metH	metG	7103474	7101430	529507.PMI2758	529507.PMI0646	0	0	0	0	0.071	0	0.9	0.126	0.911
mdeA	metG	7102987	7101430	529507.PMI2254	529507.PMI0646	0.052	0	0	0	0.061	0	0.9	0.125	0.911
metE	tyrB	7104221	7103459	529507.PMI3529	529507.PMI2743	0	0	0	0	0.063	0	0.9	0.11	0.909
mdeA	trxB	7102987	7101477	529507.PMI2254	529507.PMI0695	0	0	0	0	0.088	0	0.9	0.075	0.908
tyrB	mdeA	7103459	7102987	529507.PMI2743	529507.PMI2254	0	0	0	0	0.069	0	0.9	0	0.902
metH	tyrB	7103474	7103459	529507.PMI2758	529507.PMI2743	0	0	0	0	0.051	0	0.9	0	0.901
tyrB	metK	7103459	7102829	529507.PMI2743	529507.PMI2095	0	0	0	0	0	0	0.9	0	0.9
mdeA	cysM	7102987	7102573	529507.PMI2254	529507.PMI1831	0.381	0.002	0	0	0.118	0.215	0.673	0.365	0.894
mdeA	cysK	7102987	7102569	529507.PMI2254	529507.PMI1827	0.381	0.001	0	0	0.118	0.215	0.673	0.365	0.894
metE	cysK	7104221	7102569	529507.PMI3529	529507.PMI1827	0	0	0	0	0.063	0	0.862	0.19	0.886
metF	metK	7103648	7102829	529507.PMI2932	529507.PMI2095	0.381	0	0	0	0.341	0	0.539	0.462	0.885
metE	cysM	7104221	7102573	529507.PMI3529	529507.PMI1831	0	0	0	0	0.063	0	0.862	0.171	0.883
cysM	cysK	7102573	7102569	529507.PMI1831	529507.PMI1827	0	0	0.778	0.824	0	0	0.8	0.396	0.838
metF	metA	7103648	7103481	529507.PMI2932	529507.PMI2765	0.064	0	0	0	0.482	0	0	0.42	0.694
metA	metH	7103481	7103474	529507.PMI2765	529507.PMI2758	0.433	0	0	0	0	0	0	0.383	0.635
metK	metG	7102829	7101430	529507.PMI2095	529507.PMI0646	0.092	0	0	0	0.134	0	0	0.558	0.622
trxB	metG	7101477	7101430	529507.PMI0695	529507.PMI0646	0.06	0	0.244	0	0.095	0.182	0	0.386	0.618
metA	cysM	7103481	7102573	529507.PMI2765	529507.PMI1831	0.381	0	0	0	0	0	0	0.29	0.541
metE	metA	7104221	7103481	529507.PMI3529	529507.PMI2765	0.06	0	0	0	0.177	0	0	0.452	0.539
metA	cysK	7103481	7102569	529507.PMI2765	529507.PMI1827	0.381	0	0	0	0	0	0	0.267	0.527
hscA	fdx	7102598	7102597	529507.PMI1856	529507.PMI1855	0.907	0.169	0.712	0	0.252	0.831	0	0.811	0.999
hscB	hscA	7102599	7102598	529507.PMI1857	529507.PMI1856	0.888	0	0.61	0	0.231	0.831	0.547	0.862	0.999
iscS	iscU	7102602	7102601	529507.PMI1860	529507.PMI1859	0.835	0	0.772	0	0.843	0.945	0.673	0.828	0.999
iscU	fdx	7102601	7102597	529507.PMI1859	529507.PMI1855	0.662	0	0.738	0	0.136	0.816	0.539	0.801	0.998
iscU	hscB	7102601	7102599	529507.PMI1859	529507.PMI1857	0.653	0	0.754	0	0.609	0.834	0	0.816	0.998
iscR	iscS	7102603	7102602	529507.PMI1861	529507.PMI1860	0.763	0.772	0.171	0	0.632	0	0.534	0.69	0.997
iscS	fdx	7102602	7102597	529507.PMI1860	529507.PMI1855	0.637	0	0.602	0	0.129	0.831	0.539	0.774	0.997
iscU	hscA	7102601	7102598	529507.PMI1859	529507.PMI1856	0.662	0	0.606	0	0.131	0.834	0	0.825	0.996
hscB	fdx	7102599	7102597	529507.PMI1857	529507.PMI1855	0.888	0	0.778	0	0.46	0	0	0.726	0.995
tusA	iscS	7104287	7102602	529507.PMI3597	529507.PMI1860	0.128	0	0	0	0	0.945	0.8	0.38	0.993
iscS	thiI	7102602	7100896	529507.PMI1860	529507.PMI0097	0.417	0	0	0	0.063	0.186	0.951	0.713	0.992
iscS	hscB	7102602	7102599	529507.PMI1860	529507.PMI1857	0.627	0	0.503	0	0.573	0.215	0	0.813	0.986
iscS	sufS	7102602	7102158	529507.PMI1860	529507.PMI1412	0.381	0	0	0.624	0.052	0	0.965	0.744	0.984
iscS	hscA	7102602	7102598	529507.PMI1860	529507.PMI1856	0.637	0	0.631	0	0.129	0.13	0	0.808	0.977
iscS	sseA	7102602	7101407	529507.PMI1860	529507.PMI0623	0	0	0	0	0.083	0.215	0.905	0.559	0.965
iscS	moeB	7102602	7101420	529507.PMI1860	529507.PMI0636	0.115	0	0.218	0	0.061	0.183	0.931	0.231	0.965
iscR	iscU	7102603	7102601	529507.PMI1861	529507.PMI1859	0.724	0	0	0	0.576	0	0	0.676	0.959
iscR	hscB	7102603	7102599	529507.PMI1861	529507.PMI1857	0.582	0	0	0	0.482	0.12	0	0.717	0.938
moeB	sseA	7101420	7101407	529507.PMI0636	529507.PMI0623	0.065	0	0	0	0.059	0.195	0.905	0.127	0.93
iscU	sufS	7102601	7102158	529507.PMI1859	529507.PMI1412	0.381	0	0	0	0.059	0.215	0.673	0.566	0.923
iscR	fdx	7102603	7102597	529507.PMI1861	529507.PMI1855	0.582	0	0	0	0.071	0	0	0.664	0.858
moeB	thiI	7101420	7100896	529507.PMI0636	529507.PMI0097	0.34	0	0	0	0.063	0	0.538	0.477	0.83
iscR	hscA	7102603	7102598	529507.PMI1861	529507.PMI1856	0.582	0	0	0	0.086	0	0	0.581	0.826
sufS	moeB	7102158	7101420	529507.PMI1412	529507.PMI0636	0.085	0	0.227	0	0.063	0	0.673	0.114	0.772
sufS	thiI	7102158	7100896	529507.PMI1412	529507.PMI0097	0.053	0	0	0	0.059	0	0.539	0.271	0.66
sseA	thiI	7101407	7100896	529507.PMI0623	529507.PMI0097	0.06	0	0	0	0.046	0.215	0	0.571	0.657
hscA	sufS	7102598	7102158	529507.PMI1856	529507.PMI1412	0	0	0.215	0	0.061	0	0	0.561	0.648
hscB	sufS	7102599	7102158	529507.PMI1857	529507.PMI1412	0	0	0	0	0.063	0.12	0	0.567	0.611
hscA	thiI	7102598	7100896	529507.PMI1856	529507.PMI0097	0.064	0	0	0	0.061	0.121	0	0.552	0.607
sufS	sseA	7102158	7101407	529507.PMI1412	529507.PMI0623	0.055	0	0	0	0	0	0.538	0.121	0.582
iscR	thiI	7102603	7100896	529507.PMI1861	529507.PMI0097	0.302	0	0	0	0	0	0	0.374	0.544
iscR	sufS	7102603	7102158	529507.PMI1861	529507.PMI1412	0.381	0	0	0	0	0	0.107	0.17	0.501
tusA	thiI	7104287	7100896	529507.PMI3597	529507.PMI0097	0.251	0	0	0	0	0	0.135	0.226	0.454
hscB	thiI	7102599	7100896	529507.PMI1857	529507.PMI0097	0.047	0	0	0	0.079	0	0	0.426	0.452
fdx	thiI	7102597	7100896	529507.PMI1855	529507.PMI0097	0	0	0	0	0	0	0	0.406	0.406
pheT	pheS	7101804	7101803	529507.PMI1039	529507.PMI1038	0.896	0	0.773	0	0.991	0.945	0.948	0.742	0.999
pheT	metG	7101804	7101430	529507.PMI1039	529507.PMI0646	0.479	0	0	0	0.66	0.926	0.118	0.786	0.997
metG	ileS	7101430	7100817	529507.PMI0646	529507.PMI0015	0.096	0	0	0	0.614	0.945	0.573	0.712	0.997
argS	metG	7101861	7101430	529507.PMI1103	529507.PMI0646	0.288	0	0	0	0.541	0.945	0.573	0.654	0.996
pheS	metG	7101803	7101430	529507.PMI1038	529507.PMI0646	0.417	0	0	0	0.83	0.833	0.539	0.564	0.996
gltX	metG	7102561	7101430	529507.PMI1818	529507.PMI0646	0.107	0	0	0	0.576	0.945	0.551	0.582	0.995
metG	glnS	7101430	7101324	529507.PMI0646	529507.PMI0539	0.107	0	0	0	0.576	0.945	0.551	0.495	0.994
asnS	metG	7101546	7101430	529507.PMI0766	529507.PMI0646	0.098	0	0	0	0.611	0.932	0.551	0.489	0.993
pheT	ileS	7101804	7100817	529507.PMI1039	529507.PMI0015	0.303	0	0	0	0.661	0.943	0.118	0.495	0.992
proS	metG	7102997	7101430	529507.PMI2264	529507.PMI0646	0.063	0	0	0	0.676	0.872	0.573	0.635	0.992
lysS	metG	7102746	7101430	529507.PMI2008	529507.PMI0646	0.066	0	0.21	0	0.605	0.834	0.581	0.495	0.987
proS	leuS	7102997	7101220	529507.PMI2264	529507.PMI0433	0.052	0	0.283	0	0.576	0.846	0.118	0.67	0.984
argS	pheT	7101861	7101804	529507.PMI1103	529507.PMI1039	0.433	0	0	0	0.661	0.74	0.118	0.665	0.982
argS	ileS	7101861	7100817	529507.PMI1103	529507.PMI0015	0.053	0	0	0	0.479	0.796	0.118	0.725	0.971
gltX	ileS	7102561	7100817	529507.PMI1818	529507.PMI0015	0.048	0	0.494	0	0.527	0.735	0.107	0.567	0.971
metG	leuS	7101430	7101220	529507.PMI0646	529507.PMI0433	0.059	0	0	0.604	0.66	0.736	0.573	0.495	0.966
lysS	pheT	7102746	7101804	529507.PMI2008	529507.PMI1039	0.064	0	0.204	0	0.824	0.451	0.25	0.495	0.966
gltX	pheT	7102561	7101804	529507.PMI1818	529507.PMI1039	0.1	0	0	0	0.656	0.75	0.107	0.495	0.958
pheT	glnS	7101804	7101324	529507.PMI1039	529507.PMI0539	0.1	0	0	0	0.656	0.75	0.107	0.495	0.958
leuS	ileS	7101220	7100817	529507.PMI0433	529507.PMI0015	0.115	0	0.454	0.604	0.832	0.398	0.118	0.834	0.95
glnS	ileS	7101324	7100817	529507.PMI0539	529507.PMI0015	0.048	0.026	0	0	0.527	0.735	0.107	0.575	0.946
proS	ileS	7102997	7100817	529507.PMI2264	529507.PMI0015	0	0	0.269	0	0.585	0.568	0.118	0.585	0.943
proS	pheT	7102997	7101804	529507.PMI2264	529507.PMI1039	0.044	0	0	0	0.694	0.509	0.118	0.61	0.941
proS	argS	7102997	7101861	529507.PMI2264	529507.PMI1103	0.062	0	0	0	0.58	0.527	0.118	0.65	0.931
argS	glnS	7101861	7101324	529507.PMI1103	529507.PMI0539	0.055	0	0	0	0.516	0.747	0.107	0.388	0.925
gltX	argS	7102561	7101861	529507.PMI1818	529507.PMI1103	0.059	0	0	0	0.516	0.747	0.107	0.382	0.924
argS	leuS	7101861	7101220	529507.PMI1103	529507.PMI0433	0.043	0	0	0	0.538	0.397	0.118	0.701	0.916
lysS	leuS	7102746	7101220	529507.PMI2008	529507.PMI0433	0.06	0	0	0	0.559	0.427	0.25	0.577	0.91
pheT	leuS	7101804	7101220	529507.PMI1039	529507.PMI0433	0.076	0	0	0	0.579	0.39	0.118	0.605	0.902
pheT	asnS	7101804	7101546	529507.PMI1039	529507.PMI0766	0.06	0	0	0	0.63	0.491	0.107	0.462	0.899
lysS	ileS	7102746	7100817	529507.PMI2008	529507.PMI0015	0.044	0	0.392	0	0.574	0.43	0.25	0.211	0.897
lysS	argS	7102746	7101861	529507.PMI2008	529507.PMI1103	0.042	0	0	0	0.661	0.403	0.25	0.387	0.894
proS	glnS	7102997	7101324	529507.PMI2264	529507.PMI0539	0.067	0	0	0	0.524	0.461	0.107	0.562	0.889
argS	asnS	7101861	7101546	529507.PMI1103	529507.PMI0766	0.045	0	0.153	0	0.522	0.651	0.107	0.211	0.882
asnS	leuS	7101546	7101220	529507.PMI0766	529507.PMI0433	0.381	0	0	0	0.288	0.674	0.107	0.18	0.875
lysS	gltX	7102746	7102561	529507.PMI2008	529507.PMI1818	0.286	0	0	0	0.581	0.424	0.135	0.251	0.868
gltX	leuS	7102561	7101220	529507.PMI1818	529507.PMI0433	0.046	0	0.306	0	0.582	0.372	0.107	0.257	0.857
lysS	glnS	7102746	7101324	529507.PMI2008	529507.PMI0539	0.286	0	0	0	0.581	0.424	0.135	0.129	0.846
asnS	ileS	7101546	7100817	529507.PMI0766	529507.PMI0015	0.043	0	0	0	0.455	0.65	0.107	0.183	0.842
asnS	glnS	7101546	7101324	529507.PMI0766	529507.PMI0539	0.046	0	0.242	0	0.286	0.526	0.103	0.408	0.839
proS	lysS	7102997	7102746	529507.PMI2264	529507.PMI2008	0	0	0	0	0.529	0.427	0.25	0.211	0.818
proS	asnS	7102997	7101546	529507.PMI2264	529507.PMI0766	0.044	0	0	0	0.484	0.573	0.107	0.133	0.807
proS	gltX	7102997	7102561	529507.PMI2264	529507.PMI1818	0.067	0	0	0	0.524	0.461	0.107	0.237	0.807
glnS	leuS	7101324	7101220	529507.PMI0539	529507.PMI0433	0.062	0	0	0	0.582	0.372	0.107	0.142	0.776
pheS	ileS	7101803	7100817	529507.PMI1038	529507.PMI0015	0.11	0	0.183	0	0.478	0.328	0	0.234	0.769
lysS	pheS	7102746	7101803	529507.PMI2008	529507.PMI1038	0.051	0	0.361	0	0.573	0	0	0.211	0.768
proS	pheS	7102997	7101803	529507.PMI2264	529507.PMI1038	0	0	0	0	0.43	0	0	0.558	0.737
gltX	asnS	7102561	7101546	529507.PMI1818	529507.PMI0766	0.046	0	0	0	0.286	0.526	0.103	0.211	0.729
pheS	leuS	7101803	7101220	529507.PMI1038	529507.PMI0433	0.061	0	0	0	0.551	0	0	0.386	0.718
lysS	asnS	7102746	7101546	529507.PMI2008	529507.PMI0766	0	0	0	0.609	0.384	0.403	0.135	0.211	0.678
argS	pheS	7101861	7101803	529507.PMI1103	529507.PMI1038	0.381	0	0	0	0.294	0	0	0.281	0.658
gltX	glnS	7102561	7101324	529507.PMI1818	529507.PMI0539	0.381	0	0	0.608	0.096	0	0	0.65	0.561
pheS	asnS	7101803	7101546	529507.PMI1038	529507.PMI0766	0	0	0	0	0.463	0	0	0.184	0.543
gltX	pheS	7102561	7101803	529507.PMI1818	529507.PMI1038	0.065	0	0	0	0.28	0.058	0	0.29	0.489
moeB	moaE	7101420	7101397	529507.PMI0636	529507.PMI0613	0.381	0.526	0.528	0	0.084	0.186	0.931	0.562	0.996
iscS	thiI	7102602	7100896	529507.PMI1860	529507.PMI0097	0.417	0	0	0	0.063	0.186	0.951	0.713	0.992
thiF	moaE	7103495	7101397	529507.PMI2779	529507.PMI0613	0.381	0.656	0.454	0	0.084	0.186	0.673	0.562	0.984
thiF	thiI	7103495	7100896	529507.PMI2779	529507.PMI0097	0.34	0	0	0	0.063	0	0.951	0.477	0.982
thiG	thiF	7103497	7103495	529507.PMI2781	529507.PMI2779	0.902	0.188	0.514	0	0.416	0	0	0.246	0.98
iscS	moeB	7102602	7101420	529507.PMI1860	529507.PMI0636	0.115	0	0.218	0	0.061	0.183	0.931	0.231	0.965
thiG	thiI	7103497	7100896	529507.PMI2781	529507.PMI0097	0.107	0	0	0	0.062	0	0.9	0.562	0.958
guaA	metG	7102291	7101430	529507.PMI1545	529507.PMI0646	0.044	0	0	0	0.808	0	0	0.786	0.957
thiG	moeB	7103497	7101420	529507.PMI2781	529507.PMI0636	0.337	0.088	0.489	0	0.416	0	0	0.525	0.898
metG	pheA	7101430	7101177	529507.PMI0646	529507.PMI0390	0.107	0	0	0	0.39	0	0	0.786	0.873
pheA	thiI	7101177	7100896	529507.PMI0390	529507.PMI0097	0.105	0	0	0	0	0	0	0.843	0.853
thiF	iscS	7103495	7102602	529507.PMI2779	529507.PMI1860	0.115	0	0.227	0	0.061	0.183	0.673	0.231	0.837
metG	thiI	7101430	7100896	529507.PMI0646	529507.PMI0097	0.272	0	0	0	0.102	0	0	0.768	0.835
moeB	thiI	7101420	7100896	529507.PMI0636	529507.PMI0097	0.34	0	0	0	0.063	0	0.538	0.477	0.83
guaA	topA	7102291	7102080	529507.PMI1545	529507.PMI1334	0.068	0	0	0	0.161	0	0	0.796	0.827
topA	metG	7102080	7101430	529507.PMI1334	529507.PMI0646	0.045	0	0	0	0.1	0.127	0	0.786	0.817
guaA	thiI	7102291	7100896	529507.PMI1545	529507.PMI0097	0.08	0	0	0	0.119	0	0	0.786	0.811
guaA	pheA	7102291	7101177	529507.PMI1545	529507.PMI0390	0.052	0	0	0	0.088	0	0	0.795	0.808
moaE	thiI	7101397	7100896	529507.PMI0613	529507.PMI0097	0.059	0	0	0	0.067	0.215	0.539	0.484	0.806
topA	thiI	7102080	7100896	529507.PMI1334	529507.PMI0097	0.082	0	0	0	0.063	0	0	0.786	0.799
PMI0653	thiI	7101436	7100896	529507.PMI0653	529507.PMI0097	0.053	0	0	0	0.061	0	0	0.769	0.776
iscS	metG	7102602	7101430	529507.PMI1860	529507.PMI0646	0	0	0	0	0.103	0	0	0.569	0.596
iscS	guaA	7102602	7102291	529507.PMI1860	529507.PMI1545	0.043	0	0	0	0.595	0	0	0.043	0.596
rplF	rplB	7103970	7103958	529507.PMI3270	529507.PMI3258	0.562	0	0.47	0	0.985	0.941	0.547	0.787	0.999
ilvN	ilvB	7104212	7104211	529507.PMI3520	529507.PMI3519	0.905	0	0.675	0	0.283	0.449	0.903	0.413	0.999
ilvB	leuB	7104211	7102819	529507.PMI3519	529507.PMI2085	0.381	0	0.763	0	0.1	0.168	0.951	0.358	0.995
ilvG	leuB	7103999	7102819	529507.PMI3299	529507.PMI2085	0.381	0	0.769	0	0.1	0.168	0.951	0.24	0.995
ilvM	ilvG	7104000	7103999	529507.PMI3300	529507.PMI3299	0.905	0	0.198	0	0.063	0.13	0.819	0.275	0.99
ilvG	PMI1234	7103999	7101980	529507.PMI3299	529507.PMI1234	0.374	0	0.446	0	0.096	0.125	0.965	0.21	0.99
ilvE	ilvG	7104001	7103999	529507.PMI3301	529507.PMI3299	0.895	0	0.198	0	0.133	0.301	0.673	0.475	0.989
ilvB	PMI1234	7104211	7101980	529507.PMI3519	529507.PMI1234	0.374	0	0.335	0	0.096	0.125	0.965	0.21	0.989
PMI1234	budB	7101980	7101823	529507.PMI1234	529507.PMI1058	0.374	0	0	0	0.096	0.125	0.965	0.21	0.984
leuB	budB	7102819	7101823	529507.PMI2085	529507.PMI1058	0.381	0	0.27	0	0.1	0.13	0.951	0.211	0.983
ilvN	ilvG	7104212	7103999	529507.PMI3520	529507.PMI3299	0.356	0	0.219	0	0.283	0.449	0.903	0.109	0.979
PMI1234	thrC	7101980	7100805	529507.PMI1234	529507.PMI0003	0.043	0	0	0	0.17	0.096	0.965	0.179	0.976
ilvN	PMI1234	7104212	7101980	529507.PMI3520	529507.PMI1234	0.381	0	0	0	0.128	0	0.956	0.109	0.976
ilvN	leuB	7104212	7102819	529507.PMI3520	529507.PMI2085	0.381	0	0	0	0.181	0	0.951	0.109	0.975
ilvN	budB	7104212	7101823	529507.PMI3520	529507.PMI1058	0.356	0	0	0	0.283	0.449	0.903	0.109	0.974
ilvM	PMI1234	7104000	7101980	529507.PMI3300	529507.PMI1234	0.356	0	0	0	0.062	0	0.959	0	0.973
leuB	PMI1234	7102819	7101980	529507.PMI2085	529507.PMI1234	0.381	0	0.255	0	0.126	0	0.9	0.211	0.962
ilvE	PMI1234	7104001	7101980	529507.PMI3301	529507.PMI1234	0.355	0	0	0	0.103	0	0.8	0.564	0.942
rplB	PMI1234	7103958	7101980	529507.PMI3258	529507.PMI1234	0	0	0	0	0.07	0.929	0	0	0.931
rplF	PMI1234	7103970	7101980	529507.PMI3270	529507.PMI1234	0	0	0	0	0.06	0.929	0	0	0.93
ilvB	ilvE	7104211	7104001	529507.PMI3519	529507.PMI3301	0.374	0	0.187	0	0.133	0.301	0.673	0.381	0.923
ilvE	ilvM	7104001	7104000	529507.PMI3301	529507.PMI3300	0.858	0	0	0	0.15	0	0	0.3	0.908
ilvM	leuB	7104000	7102819	529507.PMI3300	529507.PMI2085	0	0	0	0	0.06	0	0.9	0	0.901
ilvB	ilvM	7104211	7104000	529507.PMI3519	529507.PMI3300	0.356	0	0	0	0.063	0.13	0.819	0.109	0.9
ilvM	budB	7104000	7101823	529507.PMI3300	529507.PMI1058	0.356	0	0	0	0.063	0.13	0.819	0.051	0.893
ilvE	budB	7104001	7101823	529507.PMI3301	529507.PMI1058	0.374	0	0.153	0	0.133	0.301	0.584	0.297	0.884
ilvG	budB	7103999	7101823	529507.PMI3299	529507.PMI1058	0	0	0.752	0.681	0	0	0.8	0	0.847
ilvB	budB	7104211	7101823	529507.PMI3519	529507.PMI1058	0	0	0.746	0.688	0	0	0.8	0	0.845
ilvB	ilvG	7104211	7103999	529507.PMI3519	529507.PMI3299	0	0	0.778	0.911	0	0	0.8	0.08	0.814
ilvN	ilvM	7104212	7104000	529507.PMI3520	529507.PMI3300	0	0	0	0	0.061	0	0.8	0.06	0.808
ilvE	leuB	7104001	7102819	529507.PMI3301	529507.PMI2085	0.381	0	0	0	0.084	0	0.577	0.243	0.794
ilvN	thrC	7104212	7100805	529507.PMI3520	529507.PMI0003	0.067	0	0	0	0.503	0	0.392	0.109	0.715
ilvG	thrC	7103999	7100805	529507.PMI3299	529507.PMI0003	0.298	0	0.196	0	0.085	0	0.392	0.129	0.676
ilvB	thrC	7104211	7100805	529507.PMI3519	529507.PMI0003	0.298	0	0.159	0	0.085	0	0.392	0.129	0.661
budB	thrC	7101823	7100805	529507.PMI1058	529507.PMI0003	0.298	0	0	0	0.085	0	0.392	0.129	0.614
ilvN	ilvE	7104212	7104001	529507.PMI3520	529507.PMI3301	0.381	0	0	0	0.07	0.12	0	0.109	0.488
ilvN	ilvB	7104212	7104211	529507.PMI3520	529507.PMI3519	0.905	0	0.675	0	0.283	0.449	0.903	0.413	0.999
ilvD	ilvE	7104002	7104001	529507.PMI3302	529507.PMI3301	0.763	0	0	0	0.386	0.397	0.965	0.651	0.998
ilvA	ilvG	7104003	7103999	529507.PMI3303	529507.PMI3299	0.755	0	0.446	0	0.096	0.125	0.965	0.504	0.997
ilvG	leuB	7103999	7102819	529507.PMI3299	529507.PMI2085	0.381	0	0.769	0	0.1	0.168	0.951	0.24	0.995
ilvB	leuB	7104211	7102819	529507.PMI3519	529507.PMI2085	0.381	0	0.763	0	0.1	0.168	0.951	0.358	0.995
ilvB	ilvA	7104211	7104003	529507.PMI3519	529507.PMI3303	0.374	0	0.308	0	0.096	0.125	0.965	0.66	0.995
ilvA	ilvM	7104003	7104000	529507.PMI3303	529507.PMI3300	0.748	0	0.214	0	0.063	0	0.965	0.248	0.994
ilvD	ilvG	7104002	7103999	529507.PMI3302	529507.PMI3299	0.755	0	0.742	0	0.632	0.382	0	0.596	0.993
ilvM	ilvG	7104000	7103999	529507.PMI3300	529507.PMI3299	0.905	0	0.198	0	0.063	0.13	0.819	0.275	0.99
ilvE	ilvG	7104001	7103999	529507.PMI3301	529507.PMI3299	0.895	0	0.198	0	0.133	0.301	0.673	0.475	0.989
ilvA	thrC	7104003	7100805	529507.PMI3303	529507.PMI0003	0.043	0	0	0	0.17	0.096	0.965	0.611	0.988
ilvA	ilvD	7104003	7104002	529507.PMI3303	529507.PMI3302	0.906	0.002	0.254	0	0.386	0	0	0.77	0.988
ilvA	ilvE	7104003	7104001	529507.PMI3303	529507.PMI3301	0.756	0	0	0	0.103	0	0.8	0.713	0.985
ilvA	budB	7104003	7101823	529507.PMI3303	529507.PMI1058	0.374	0	0	0	0.096	0.125	0.965	0.227	0.984
leuB	budB	7102819	7101823	529507.PMI2085	529507.PMI1058	0.381	0	0.27	0	0.1	0.13	0.951	0.211	0.983
ilvA	leuB	7104003	7102819	529507.PMI3303	529507.PMI2085	0.381	0	0.355	0	0.126	0	0.9	0.583	0.982
ilvB	ilvD	7104211	7104002	529507.PMI3519	529507.PMI3302	0.374	0	0.719	0	0.632	0.382	0	0.599	0.981
ilvN	ilvG	7104212	7103999	529507.PMI3520	529507.PMI3299	0.356	0	0.219	0	0.283	0.449	0.903	0.109	0.979
ilvN	ilvA	7104212	7104003	529507.PMI3520	529507.PMI3303	0.381	0	0	0	0.128	0	0.956	0.109	0.976
ilvN	leuB	7104212	7102819	529507.PMI3520	529507.PMI2085	0.381	0	0	0	0.181	0	0.951	0.109	0.975
ilvN	budB	7104212	7101823	529507.PMI3520	529507.PMI1058	0.356	0	0	0	0.283	0.449	0.903	0.109	0.974
ilvA	trpA	7104003	7102094	529507.PMI3303	529507.PMI1348	0	0	0	0	0.13	0	0.9	0.457	0.948
ilvB	ilvE	7104211	7104001	529507.PMI3519	529507.PMI3301	0.374	0	0.187	0	0.133	0.301	0.673	0.381	0.923
ilvD	budB	7104002	7101823	529507.PMI3302	529507.PMI1058	0.374	0	0	0	0.632	0.382	0	0.451	0.911
ilvE	ilvM	7104001	7104000	529507.PMI3301	529507.PMI3300	0.858	0	0	0	0.15	0	0	0.3	0.908
ilvM	leuB	7104000	7102819	529507.PMI3300	529507.PMI2085	0	0	0	0	0.06	0	0.9	0	0.901
ilvB	ilvM	7104211	7104000	529507.PMI3519	529507.PMI3300	0.356	0	0	0	0.063	0.13	0.819	0.109	0.9
ilvM	budB	7104000	7101823	529507.PMI3300	529507.PMI1058	0.356	0	0	0	0.063	0.13	0.819	0.051	0.893
ilvE	budB	7104001	7101823	529507.PMI3301	529507.PMI1058	0.374	0	0.153	0	0.133	0.301	0.584	0.297	0.884
ilvG	budB	7103999	7101823	529507.PMI3299	529507.PMI1058	0	0	0.752	0.681	0	0	0.8	0	0.847
ilvB	budB	7104211	7101823	529507.PMI3519	529507.PMI1058	0	0	0.746	0.688	0	0	0.8	0	0.845
ilvD	leuB	7104002	7102819	529507.PMI3302	529507.PMI2085	0.381	0	0.41	0	0.272	0	0	0.413	0.823
ilvN	ilvD	7104212	7104002	529507.PMI3520	529507.PMI3302	0.381	0	0.205	0	0.453	0.372	0	0.109	0.821
ilvB	ilvG	7104211	7103999	529507.PMI3519	529507.PMI3299	0	0	0.778	0.911	0	0	0.8	0.08	0.814
ilvN	ilvM	7104212	7104000	529507.PMI3520	529507.PMI3300	0	0	0	0	0.061	0	0.8	0.06	0.808
ilvE	leuB	7104001	7102819	529507.PMI3301	529507.PMI2085	0.381	0	0	0	0.084	0	0.577	0.243	0.794
leuB	trpA	7102819	7102094	529507.PMI2085	529507.PMI1348	0.381	0	0	0	0.107	0	0	0.631	0.778
ilvD	ilvM	7104002	7104000	529507.PMI3302	529507.PMI3300	0.678	0	0	0	0.125	0	0	0.262	0.774
ilvN	thrC	7104212	7100805	529507.PMI3520	529507.PMI0003	0.067	0	0	0	0.503	0	0.392	0.109	0.715
ilvG	thrC	7103999	7100805	529507.PMI3299	529507.PMI0003	0.298	0	0.196	0	0.085	0	0.392	0.129	0.676
ilvB	thrC	7104211	7100805	529507.PMI3519	529507.PMI0003	0.298	0	0.159	0	0.085	0	0.392	0.129	0.661
budB	thrC	7101823	7100805	529507.PMI1058	529507.PMI0003	0.298	0	0	0	0.085	0	0.392	0.129	0.614
ilvD	trpA	7104002	7102094	529507.PMI3302	529507.PMI1348	0	0	0	0	0.077	0	0	0.597	0.613
ilvD	thrC	7104002	7100805	529507.PMI3302	529507.PMI0003	0.124	0	0.229	0	0.153	0	0	0.382	0.599
trpA	thrC	7102094	7100805	529507.PMI1348	529507.PMI0003	0	0	0	0	0.517	0	0	0.122	0.557
ilvN	ilvE	7104212	7104001	529507.PMI3520	529507.PMI3301	0.381	0	0	0	0.07	0.12	0	0.109	0.488
ilvB	trpA	7104211	7102094	529507.PMI3519	529507.PMI1348	0	0	0	0	0.209	0	0	0.316	0.436
thrB	thrA	7100804	7100803	529507.PMI0002	529507.PMI0001	0.921	0	0.771	0	0.999	0.215	0.974	0.495	0.999
metL	thrC	7103924	7100805	529507.PMI3224	529507.PMI0003	0.464	0	0.484	0	0.999	0.215	0.392	0.495	0.999
metL	thrB	7103924	7100804	529507.PMI3224	529507.PMI0002	0.464	0	0.564	0	0.999	0.215	0.974	0.495	0.999
thrC	thrB	7100805	7100804	529507.PMI0003	529507.PMI0002	0.89	0.643	0.759	0	0.985	0	0.965	0.785	0.999
metL	thrA	7103924	7100803	529507.PMI3224	529507.PMI0001	0.478	0	0.777	0.691	0.927	0.897	0.947	0.494	0.999
thrC	thrA	7100805	7100803	529507.PMI0003	529507.PMI0001	0.921	0	0.761	0	0.999	0.215	0.392	0.642	0.999
metL	usg	7103924	7102535	529507.PMI3224	529507.PMI1790	0.478	0	0.16	0	0.929	0.327	0.752	0.495	0.996
usg	thrA	7102535	7100803	529507.PMI1790	529507.PMI0001	0.478	0	0.203	0	0.929	0.327	0.752	0.495	0.996
metE	metB	7104221	7103923	529507.PMI3529	529507.PMI3223	0.302	0	0	0	0.129	0	0.965	0.807	0.995
metL	metB	7103924	7103923	529507.PMI3224	529507.PMI3223	0.908	0	0	0	0.475	0.119	0.8	0.475	0.994
metL	lysC	7103924	7103471	529507.PMI3224	529507.PMI2755	0.381	0	0.744	0.654	0.701	0.461	0.893	0.412	0.992
lysC	thrA	7103471	7100803	529507.PMI2755	529507.PMI0001	0.381	0	0.766	0.709	0.701	0.461	0.893	0.232	0.991
metE	PMI0626	7104221	7101410	529507.PMI3529	529507.PMI0626	0.302	0	0	0	0.128	0	0.965	0.454	0.987
metE	PMI0028	7104221	7100830	529507.PMI3529	529507.PMI0028	0.302	0	0	0	0.128	0	0.965	0.454	0.987
lysC	thrB	7103471	7100804	529507.PMI2755	529507.PMI0002	0.356	0	0.566	0	0.816	0.169	0.584	0.186	0.982
metB	PMI0626	7103923	7101410	529507.PMI3223	529507.PMI0626	0	0	0.778	0.721	0.083	0	0.965	0.639	0.978
metB	PMI0028	7103923	7100830	529507.PMI3223	529507.PMI0028	0	0	0.778	0.72	0.083	0	0.965	0.638	0.978
lysC	usg	7103471	7102535	529507.PMI2755	529507.PMI1790	0.381	0	0.194	0	0.809	0	0.673	0.381	0.977
PMI0028	thrA	7100830	7100803	529507.PMI0028	529507.PMI0001	0.433	0	0	0	0.475	0.119	0.8	0.475	0.967
metB	thrA	7103923	7100803	529507.PMI3223	529507.PMI0001	0.433	0	0	0	0.475	0.119	0.8	0.475	0.967
PMI0626	thrA	7101410	7100803	529507.PMI0626	529507.PMI0001	0.433	0	0	0	0.475	0.119	0.8	0.475	0.967
metL	PMI0626	7103924	7101410	529507.PMI3224	529507.PMI0626	0.433	0	0	0	0.475	0.119	0.8	0.475	0.967
metL	PMI0028	7103924	7100830	529507.PMI3224	529507.PMI0028	0.433	0	0	0	0.475	0.119	0.8	0.475	0.967
ilvE	metL	7104001	7103924	529507.PMI3301	529507.PMI3224	0.447	0	0	0	0.258	0.119	0.8	0.461	0.953
ilvE	thrA	7104001	7100803	529507.PMI3301	529507.PMI0001	0.447	0	0	0	0.258	0.119	0.8	0.461	0.953
metB	thrB	7103923	7100804	529507.PMI3223	529507.PMI0002	0.381	0	0	0	0.103	0	0.905	0.145	0.949
lysC	thrC	7103471	7100805	529507.PMI2755	529507.PMI0003	0.356	0	0.269	0	0.822	0.169	0	0.28	0.94
PMI0626	thrB	7101410	7100804	529507.PMI0626	529507.PMI0002	0.381	0	0	0	0.103	0	0.872	0.145	0.931
PMI0028	thrB	7100830	7100804	529507.PMI0028	529507.PMI0002	0.381	0	0	0	0.103	0	0.872	0.145	0.931
ilvE	metB	7104001	7103923	529507.PMI3301	529507.PMI3223	0	0	0	0	0.071	0.177	0.9	0.128	0.924
usg	thrC	7102535	7100805	529507.PMI1790	529507.PMI0003	0.381	0	0	0	0.823	0.126	0	0.183	0.911
metE	thrA	7104221	7100803	529507.PMI3529	529507.PMI0001	0.061	0	0	0	0.151	0	0.8	0.407	0.892
metE	metL	7104221	7103924	529507.PMI3529	529507.PMI3224	0.061	0	0	0	0.151	0	0.8	0.407	0.892
usg	thrB	7102535	7100804	529507.PMI1790	529507.PMI0002	0.381	0	0.304	0	0.661	0	0	0.16	0.86
ilvE	thrB	7104001	7100804	529507.PMI3301	529507.PMI0002	0.132	0	0	0	0.103	0	0.8	0.147	0.849
metE	thrB	7104221	7100804	529507.PMI3529	529507.PMI0002	0.043	0	0.15	0	0.07	0	0.8	0.061	0.832
PMI0626	PMI0028	7101410	7100830	529507.PMI0626	529507.PMI0028	0	0	0.778	0.879	0	0	0.8	0	0.818
ilvE	lysC	7104001	7103471	529507.PMI3301	529507.PMI2755	0.302	0	0.349	0	0.154	0	0	0.133	0.622
ilvE	usg	7104001	7102535	529507.PMI3301	529507.PMI1790	0.302	0	0	0	0.158	0.13	0	0.157	0.511
metB	usg	7103923	7102535	529507.PMI3223	529507.PMI1790	0.381	0	0	0	0.059	0	0	0.075	0.414
usg	PMI0626	7102535	7101410	529507.PMI1790	529507.PMI0626	0.381	0	0	0	0.06	0	0	0.075	0.414
usg	PMI0028	7102535	7100830	529507.PMI1790	529507.PMI0028	0.381	0	0	0	0.06	0	0	0.075	0.414
dnaN	polA	7103838	7103542	529507.PMI3133	529507.PMI2826	0	0	0.43	0	0.606	0.868	0.539	0.6	0.993
polA	polB	7103542	7103060	529507.PMI2826	529507.PMI2327	0	0	0	0	0.562	0.461	0.539	0.842	0.98
polA	recA	7103542	7101162	529507.PMI2826	529507.PMI0375	0.101	0	0	0	0.28	0.53	0.531	0.865	0.977
umuC	recA	7103218	7101162	529507.PMI2485	529507.PMI0375	0.369	0	0	0	0.079	0.779	0.523	0.694	0.977
polA	pykA	7103542	7101903	529507.PMI2826	529507.PMI1155	0.434	0	0	0	0.063	0	0.9	0.588	0.975
polA	pykF	7103542	7102151	529507.PMI2826	529507.PMI1405	0.434	0	0	0	0.063	0	0.9	0.598	0.975
polA	PMI2409	7103542	7103142	529507.PMI2826	529507.PMI2409	0.434	0	0	0	0.063	0	0.9	0.572	0.974
dnaN	polB	7103838	7103060	529507.PMI3133	529507.PMI2327	0	0	0	0	0.39	0.881	0.539	0.307	0.973
recA	dinB	7101162	7101150	529507.PMI0375	529507.PMI0362	0.369	0	0	0	0.079	0.697	0.523	0.699	0.97
polA	mutS	7103542	7102968	529507.PMI2826	529507.PMI2235	0.084	0	0	0	0.389	0.737	0.539	0.629	0.97
polA	dinB	7103542	7101150	529507.PMI2826	529507.PMI0362	0.057	0	0	0	0.161	0.834	0.539	0.558	0.968
polA	umuC	7103542	7103218	529507.PMI2826	529507.PMI2485	0.057	0	0	0	0.161	0.834	0.539	0.54	0.967
polB	dinB	7103060	7101150	529507.PMI2327	529507.PMI0362	0	0	0	0	0.094	0.803	0.539	0.585	0.961
polA	sbcC	7103542	7100851	529507.PMI2826	529507.PMI0049	0	0	0	0	0.515	0.442	0.752	0.481	0.96
dnaN	mutS	7103838	7102968	529507.PMI3133	529507.PMI2235	0	0	0.181	0	0.319	0.834	0.539	0.176	0.958
polB	recA	7103060	7101162	529507.PMI2327	529507.PMI0375	0	0	0	0	0.067	0.416	0.502	0.86	0.956
dnaN	dinB	7103838	7101150	529507.PMI3133	529507.PMI0362	0	0	0	0	0.067	0.867	0.539	0.176	0.946
dnaN	umuC	7103838	7103218	529507.PMI3133	529507.PMI2485	0	0	0	0	0.067	0.837	0.539	0.221	0.938
dnaN	recA	7103838	7101162	529507.PMI3133	529507.PMI0375	0.047	0	0	0	0.217	0.461	0.537	0.686	0.931
dnaN	pykF	7103838	7102151	529507.PMI3133	529507.PMI1405	0.146	0	0	0	0.063	0	0.9	0.127	0.92
dnaN	pykA	7103838	7101903	529507.PMI3133	529507.PMI1155	0.146	0	0	0	0.063	0	0.9	0.127	0.92
dnaN	PMI2409	7103838	7103142	529507.PMI3133	529507.PMI2409	0.146	0	0	0	0.063	0	0.9	0.127	0.92
umuC	polB	7103218	7103060	529507.PMI2485	529507.PMI2327	0	0	0	0	0.094	0.803	0.539	0.153	0.92
polB	mutS	7103060	7102968	529507.PMI2327	529507.PMI2235	0	0	0	0	0.304	0.461	0	0.778	0.909
mutS	recA	7102968	7101162	529507.PMI2235	529507.PMI0375	0.381	0	0	0	0.083	0.215	0.103	0.789	0.9
recA	sbcC	7101162	7100851	529507.PMI0375	529507.PMI0049	0.057	0	0	0	0.154	0.461	0.529	0.331	0.84
PMI2409	pykF	7103142	7102151	529507.PMI2409	529507.PMI1405	0	0	0.778	0.814	0	0	0.8	0	0.828
pykF	pykA	7102151	7101903	529507.PMI1405	529507.PMI1155	0	0	0.778	0.826	0	0	0.8	0.074	0.827
PMI2409	pykA	7103142	7101903	529507.PMI2409	529507.PMI1155	0	0	0.778	0.924	0	0	0.8	0	0.811
umuC	sbcC	7103218	7100851	529507.PMI2485	529507.PMI0049	0	0	0	0	0.225	0.143	0.52	0.465	0.806
mutS	dinB	7102968	7101150	529507.PMI2235	529507.PMI0362	0.064	0	0	0	0.095	0.283	0	0.652	0.76
dnaN	sbcC	7103838	7100851	529507.PMI3133	529507.PMI0049	0	0	0	0	0.084	0.29	0.537	0.254	0.745
polB	sbcC	7103060	7100851	529507.PMI2327	529507.PMI0049	0	0	0.168	0	0.241	0.188	0.487	0.127	0.728
dinB	sbcC	7101150	7100851	529507.PMI0362	529507.PMI0049	0	0	0	0	0.225	0.143	0.52	0.245	0.727
umuC	mutS	7103218	7102968	529507.PMI2485	529507.PMI2235	0.064	0	0	0	0.095	0.283	0	0.381	0.573
umuC	dinB	7103218	7101150	529507.PMI2485	529507.PMI0362	0	0	0.632	0.621	0.077	0	0	0.719	0.482
metF	metH	7103648	7103474	529507.PMI2932	529507.PMI2758	0.478	0	0	0	0.641	0	0.974	0.587	0.997
metE	metK	7104221	7102829	529507.PMI3529	529507.PMI2095	0.06	0	0	0	0.661	0.213	0.965	0.632	0.996
metH	metK	7103474	7102829	529507.PMI2758	529507.PMI2095	0.407	0	0	0	0.127	0	0.974	0.495	0.992
metE	PMI1248	7104221	7101994	529507.PMI3529	529507.PMI1248	0.302	0	0	0	0.129	0	0.965	0.638	0.991
metE	mdeA	7104221	7102987	529507.PMI3529	529507.PMI2254	0.302	0	0	0	0.129	0	0.965	0.638	0.991
metH	PMI1248	7103474	7101994	529507.PMI2758	529507.PMI1248	0.303	0	0	0	0.063	0	0.974	0.495	0.99
metH	mdeA	7103474	7102987	529507.PMI2758	529507.PMI2254	0.303	0	0	0	0.063	0	0.974	0.495	0.99
metE	metF	7104221	7103648	529507.PMI3529	529507.PMI2932	0.381	0	0.311	0	0.819	0.123	0.581	0.72	0.99
metE	metH	7104221	7103474	529507.PMI3529	529507.PMI2758	0.386	0	0	0	0.1	0	0.894	0.682	0.979
metK	PMI1248	7102829	7101994	529507.PMI2095	529507.PMI1248	0.044	0	0	0	0.114	0.454	0.9	0.567	0.976
mdeA	metK	7102987	7102829	529507.PMI2254	529507.PMI2095	0.044	0	0	0	0.114	0.454	0.9	0.567	0.976
metF	mdeA	7103648	7102987	529507.PMI2932	529507.PMI2254	0.381	0	0	0	0.48	0.215	0.539	0.47	0.927
metF	PMI1248	7103648	7101994	529507.PMI2932	529507.PMI1248	0.381	0	0	0	0.48	0.215	0.539	0.47	0.927
metE	tyrB	7104221	7103459	529507.PMI3529	529507.PMI2743	0	0	0	0	0.063	0	0.9	0.11	0.909
tyrB	PMI1248	7103459	7101994	529507.PMI2743	529507.PMI1248	0	0	0	0	0.069	0	0.9	0	0.902
tyrB	mdeA	7103459	7102987	529507.PMI2743	529507.PMI2254	0	0	0	0	0.069	0	0.9	0	0.902
metH	tyrB	7103474	7103459	529507.PMI2758	529507.PMI2743	0	0	0	0	0.051	0	0.9	0	0.901
tyrB	metK	7103459	7102829	529507.PMI2743	529507.PMI2095	0	0	0	0	0	0	0.9	0	0.9
metF	metK	7103648	7102829	529507.PMI2932	529507.PMI2095	0.381	0	0	0	0.341	0	0.539	0.462	0.885
groL	metK	7103277	7102829	529507.PMI2543	529507.PMI2095	0.045	0	0	0	0.061	0.834	0	0.227	0.869
mdeA	PMI1248	7102987	7101994	529507.PMI2254	529507.PMI1248	0	0	0.778	0.829	0	0	0.8	0	0.826
metK	hisI	7102829	7101440	529507.PMI2095	529507.PMI0658	0.3	0	0	0	0	0.725	0	0.117	0.815
ispF	metK	7102974	7102829	529507.PMI2241	529507.PMI2095	0.129	0.788	0	0	0	0	0	0	0.807
metK	rlmN	7102829	7102590	529507.PMI2095	529507.PMI1848	0.299	0	0	0	0	0.13	0.667	0	0.779
metF	hisI	7103648	7101440	529507.PMI2932	529507.PMI0658	0.068	0	0	0	0.063	0	0	0.614	0.633
metF	groL	7103648	7103277	529507.PMI2932	529507.PMI2543	0	0	0	0	0.062	0.397	0	0.143	0.472
metE	groL	7104221	7103277	529507.PMI3529	529507.PMI2543	0	0	0	0	0.06	0.397	0	0.115	0.454
metH	hisI	7103474	7101440	529507.PMI2758	529507.PMI0658	0.433	0	0	0	0	0	0	0	0.433
truB	truA	7104119	7102534	529507.PMI3420	529507.PMI1789	0	0	0.556	0	0.165	0.398	0.507	0.701	0.961
ftsJ	sun	7104110	7103986	529507.PMI3411	529507.PMI3286	0.083	0	0	0	0.588	0.765	0	0.339	0.933
truB	ksgA	7104119	7103067	529507.PMI3420	529507.PMI2334	0.062	0	0.526	0	0.612	0.181	0	0.579	0.929
ftsJ	ksgA	7104110	7103067	529507.PMI3411	529507.PMI2334	0	0	0.37	0	0.606	0.123	0	0.683	0.921
sun	ksgA	7103986	7103067	529507.PMI3286	529507.PMI2334	0.127	0	0.297	0	0.674	0	0	0.62	0.913
sun	tmcA	7103986	7102305	529507.PMI3286	529507.PMI1559	0	0	0.403	0	0.823	0.181	0	0	0.905
truB	ftsJ	7104119	7104110	529507.PMI3420	529507.PMI3411	0.174	0	0.175	0	0.582	0.215	0	0.573	0.887
truD	tmcA	7102973	7102305	529507.PMI2240	529507.PMI1559	0.049	0	0.256	0	0.833	0	0	0.129	0.883
ftsJ	tmcA	7104110	7102305	529507.PMI3411	529507.PMI1559	0	0	0	0	0.84	0.246	0	0	0.874
truB	truD	7104119	7102973	529507.PMI3420	529507.PMI2240	0	0	0	0	0.515	0.124	0	0.686	0.854
cysK	PMI0235	7102569	7101031	529507.PMI1827	529507.PMI0235	0	0	0.775	0.686	0	0	0.8	0	0.848
cysM	PMI0235	7102573	7101031	529507.PMI1831	529507.PMI0235	0	0	0.776	0.706	0	0	0.8	0	0.845
ksgA	truA	7103067	7102534	529507.PMI2334	529507.PMI1789	0.048	0	0.574	0	0.548	0	0	0.259	0.845
cysM	cysK	7102573	7102569	529507.PMI1831	529507.PMI1827	0	0	0.778	0.824	0	0	0.8	0.396	0.838
truB	tmcA	7104119	7102305	529507.PMI3420	529507.PMI1559	0	0	0	0	0.692	0.441	0	0	0.82
truB	sun	7104119	7103986	529507.PMI3420	529507.PMI3286	0.093	0	0.207	0	0.688	0.178	0	0.127	0.809
ksgA	tmcA	7103067	7102305	529507.PMI2334	529507.PMI1559	0	0	0	0	0.686	0.13	0	0	0.715
truB	trmA	7104119	7103945	529507.PMI3420	529507.PMI3245	0	0	0	0	0.482	0	0	0.448	0.701
trmA	truA	7103945	7102534	529507.PMI3245	529507.PMI1789	0.302	0	0	0	0.566	0	0	0.075	0.695
trmA	tmcA	7103945	7102305	529507.PMI3245	529507.PMI1559	0	0	0	0	0.685	0	0	0	0.685
sun	trmA	7103986	7103945	529507.PMI3286	529507.PMI3245	0	0	0	0	0.604	0.136	0	0.089	0.661
trmA	truD	7103945	7102973	529507.PMI3245	529507.PMI2240	0.044	0	0	0	0.482	0.169	0	0.235	0.643
trmA	PMI0235	7103945	7101031	529507.PMI3245	529507.PMI0235	0.381	0	0	0	0.068	0.398	0	0	0.622
trmA	cysM	7103945	7102573	529507.PMI3245	529507.PMI1831	0.381	0	0	0	0.068	0.398	0	0	0.622
trmA	cysK	7103945	7102569	529507.PMI3245	529507.PMI1827	0.381	0	0	0	0.068	0.398	0	0	0.622
sun	truD	7103986	7102973	529507.PMI3286	529507.PMI2240	0	0	0	0	0.511	0.178	0	0.115	0.613
trmA	ksgA	7103945	7103067	529507.PMI3245	529507.PMI2334	0	0	0	0	0.525	0.119	0	0.11	0.595
ftsJ	truD	7104110	7102973	529507.PMI3411	529507.PMI2240	0	0	0	0	0.58	0	0	0.061	0.588
ftsJ	truA	7104110	7102534	529507.PMI3411	529507.PMI1789	0.044	0	0.204	0	0.219	0	0	0.383	0.584
ftsJ	trmA	7104110	7103945	529507.PMI3411	529507.PMI3245	0	0	0	0	0.516	0.125	0	0.075	0.574
ksgA	truD	7103067	7102973	529507.PMI2334	529507.PMI2240	0	0	0	0	0.559	0	0	0	0.559
sun	truA	7103986	7102534	529507.PMI3286	529507.PMI1789	0	0	0	0	0.476	0.125	0	0.11	0.556
truA	tmcA	7102534	7102305	529507.PMI1789	529507.PMI1559	0	0	0	0	0.413	0	0	0	0.412
mutY	PMI0325	7101114	7101113	529507.PMI0326	529507.PMI0325	0.819	0.788	0	0	0.062	0	0	0.351	0.973
PMI0328	trmB	7101116	7101115	529507.PMI0328	529507.PMI0327	0.89	0	0	0	0.08	0	0	0	0.894
trmB	mutY	7101115	7101114	529507.PMI0327	529507.PMI0326	0.671	0	0	0	0.118	0	0	0.115	0.721
truD	trmB	7102973	7101115	529507.PMI2240	529507.PMI0327	0.112	0	0.162	0	0.469	0.172	0	0.234	0.703
hemK	trmB	7101846	7101115	529507.PMI1088	529507.PMI0327	0	0.67	0	0	0.063	0	0	0.098	0.697
trmL	trmB	7103888	7101115	529507.PMI3187	529507.PMI0327	0.322	0	0.249	0	0.063	0	0	0.41	0.68
glsA	trmB	7101117	7101115	529507.PMI0329	529507.PMI0327	0.654	0	0	0	0	0	0	0	0.655
glsA	PMI0328	7101117	7101116	529507.PMI0329	529507.PMI0328	0.652	0	0	0	0	0	0	0	0.653
trmB	PMI0325	7101115	7101113	529507.PMI0327	529507.PMI0325	0.636	0	0	0	0	0	0	0	0.636
rplJ	trmB	7103503	7101115	529507.PMI2787	529507.PMI0327	0	0	0.158	0	0.488	0.129	0	0.109	0.62
truA	trmB	7102534	7101115	529507.PMI1789	529507.PMI0327	0.106	0	0	0	0.44	0.152	0	0.208	0.618
mnmC	trmB	7102540	7101115	529507.PMI1796	529507.PMI0327	0.119	0	0	0	0.062	0	0	0.563	0.607
trmL	mnmC	7103888	7102540	529507.PMI3187	529507.PMI1796	0.067	0	0	0	0	0	0	0.565	0.576
PMI0328	mutY	7101116	7101114	529507.PMI0328	529507.PMI0326	0.547	0	0	0	0	0	0	0	0.547
rplJ	truA	7103503	7102534	529507.PMI2787	529507.PMI1789	0	0	0	0	0.342	0.123	0	0.253	0.531
PMI0328	PMI0325	7101116	7101113	529507.PMI0328	529507.PMI0325	0.485	0	0	0	0	0	0	0	0.486
mnmC	hemK	7102540	7101846	529507.PMI1796	529507.PMI1088	0	0	0	0	0.137	0	0	0.387	0.448
glsA	mutY	7101117	7101114	529507.PMI0329	529507.PMI0326	0.424	0	0	0	0	0	0	0	0.425
thiE	thiD	7103494	7102339	529507.PMI2778	529507.PMI1593	0.381	0.899	0.774	0	0.396	0	0.965	0.677	0.999
thiH	thiG	7103498	7103497	529507.PMI2782	529507.PMI2781	0.89	0.421	0.777	0	0.492	0.932	0.9	0.808	0.999
thiG	thiC	7103497	7103493	529507.PMI2781	529507.PMI2777	0.89	0.151	0.653	0	0.471	0.726	0	0.732	0.998
thiS	thiF	7103496	7103495	529507.PMI2780	529507.PMI2779	0.902	0	0.192	0	0.191	0.847	0.8	0.089	0.997
thiE	thiC	7103494	7103493	529507.PMI2778	529507.PMI2777	0.89	0.129	0.405	0	0.515	0	0.58	0.786	0.996
thiH	thiC	7103498	7103493	529507.PMI2782	529507.PMI2777	0.89	0.276	0.166	0	0.45	0.726	0	0.646	0.995
thiC	thiD	7103493	7102339	529507.PMI2777	529507.PMI1593	0.381	0	0.236	0	0.39	0	0.965	0.648	0.995
thiG	thiE	7103497	7103494	529507.PMI2781	529507.PMI2778	0.89	0.284	0.459	0	0.569	0	0	0.789	0.995
thiE	thiL	7103494	7100884	529507.PMI2778	529507.PMI0084	0.381	0	0.393	0	0.063	0	0.965	0.651	0.995
thiG	thiS	7103497	7103496	529507.PMI2781	529507.PMI2780	0.89	0	0.294	0	0.484	0.741	0	0.113	0.989
thiH	thiE	7103498	7103494	529507.PMI2782	529507.PMI2778	0.89	0.362	0	0	0.479	0	0	0.736	0.989
thiG	thiF	7103497	7103495	529507.PMI2781	529507.PMI2779	0.902	0.188	0.514	0	0.416	0	0	0.246	0.98
PMI0872	thiL	7101644	7100884	529507.PMI0872	529507.PMI0084	0	0	0	0	0	0	0.965	0.233	0.972
thiH	thiS	7103498	7103496	529507.PMI2782	529507.PMI2780	0.89	0	0.512	0	0.118	0	0	0.397	0.967
thiF	thiE	7103495	7103494	529507.PMI2779	529507.PMI2778	0.902	0.1	0.315	0	0.286	0	0	0.176	0.958
thiE	aphA	7103494	7101510	529507.PMI2778	529507.PMI0729	0	0	0	0	0	0	0.957	0	0.957
thiH	thiF	7103498	7103495	529507.PMI2782	529507.PMI2779	0.902	0.213	0.243	0	0.241	0	0	0.127	0.954
thiS	thiE	7103496	7103494	529507.PMI2780	529507.PMI2778	0.89	0	0	0	0.522	0	0	0.046	0.945
thiD	thiL	7102339	7100884	529507.PMI1593	529507.PMI0084	0.381	0	0.227	0	0.082	0	0.581	0.737	0.942
thiF	thiC	7103495	7103493	529507.PMI2779	529507.PMI2777	0.902	0.076	0	0	0.225	0	0	0.129	0.931
thiS	thiC	7103496	7103493	529507.PMI2780	529507.PMI2777	0.89	0	0	0	0.289	0	0	0.061	0.92
thiC	thiL	7103493	7100884	529507.PMI2777	529507.PMI0084	0.381	0	0	0	0	0	0.579	0.721	0.92
thiS	moeB	7103496	7101420	529507.PMI2780	529507.PMI0636	0.337	0	0	0	0.191	0.847	0	0.089	0.915
thiE	PMI0872	7103494	7101644	529507.PMI2778	529507.PMI0872	0	0	0	0	0.081	0	0.9	0.118	0.911
thiG	moeB	7103497	7101420	529507.PMI2781	529507.PMI0636	0.337	0.088	0.489	0	0.416	0	0	0.525	0.898
thiG	thiD	7103497	7102339	529507.PMI2781	529507.PMI1593	0.381	0	0.309	0	0.134	0	0	0.717	0.881
thiH	thiD	7103498	7102339	529507.PMI2782	529507.PMI1593	0.381	0	0	0	0.089	0	0	0.643	0.781
thiE	moeB	7103494	7101420	529507.PMI2778	529507.PMI0636	0.337	0.045	0.241	0	0.286	0	0	0.451	0.777
thiG	thiL	7103497	7100884	529507.PMI2781	529507.PMI0084	0	0	0	0	0.063	0	0	0.739	0.744
thiH	moeB	7103498	7101420	529507.PMI2782	529507.PMI0636	0.337	0.096	0	0	0.241	0	0	0.462	0.723
thiH	thiL	7103498	7100884	529507.PMI2782	529507.PMI0084	0	0	0	0	0	0	0	0.654	0.654
thiF	thiD	7103495	7102339	529507.PMI2779	529507.PMI1593	0.381	0	0.176	0	0.103	0	0	0.172	0.57
thiD	moeB	7102339	7101420	529507.PMI1593	529507.PMI0636	0.381	0	0.172	0	0.103	0	0	0.172	0.568
thiC	moeB	7103493	7101420	529507.PMI2777	529507.PMI0636	0.337	0.034	0	0	0.225	0	0	0.129	0.513
thiS	thiD	7103496	7102339	529507.PMI2780	529507.PMI1593	0.381	0	0	0	0.225	0	0	0.06	0.509
PMI0606	bioB	7101390	7101387	529507.PMI0606	529507.PMI0603	0.902	0	0.774	0	0.649	0	0.965	0.738	0.999
accB	accC	7104318	7104317	529507.PMI3628	529507.PMI3627	0.872	0	0.754	0	0.81	0.461	0.914	0.715	0.999
accB	fabD	7104318	7101632	529507.PMI3628	529507.PMI0860	0.381	0	0.219	0	0.591	0.174	0.965	0.563	0.996
accC	fabD	7104317	7101632	529507.PMI3627	529507.PMI0860	0.381	0	0.243	0	0.536	0.174	0.965	0.231	0.994
accB	birA	7104318	7103949	529507.PMI3628	529507.PMI3249	0.431	0	0.223	0	0.566	0.621	0.539	0.45	0.977
PMI3559	fabD	7104250	7101632	529507.PMI3559	529507.PMI0860	0.303	0	0.211	0	0.06	0	0.956	0.075	0.975
birA	bioB	7103949	7101387	529507.PMI3249	529507.PMI0603	0.424	0	0	0	0.062	0	0.9	0.267	0.955
accC	birA	7104317	7103949	529507.PMI3627	529507.PMI3249	0.431	0	0.519	0	0.285	0.18	0.539	0.442	0.949
birA	murB	7103949	7103948	529507.PMI3249	529507.PMI3248	0.916	0	0	0	0.063	0	0	0.235	0.935
accB	PMI3559	7104318	7104250	529507.PMI3628	529507.PMI3559	0.301	0	0.499	0	0.061	0	0.8	0.107	0.93
birA	nadE	7103949	7102613	529507.PMI3249	529507.PMI1871	0.07	0	0	0	0.069	0	0	0.886	0.892
birA	fabD	7103949	7101632	529507.PMI3249	529507.PMI0860	0.381	0	0.662	0	0.062	0.12	0	0.347	0.866
accC	PMI3559	7104317	7104250	529507.PMI3627	529507.PMI3559	0.075	0	0.778	0.897	0.061	0	0.812	0.122	0.838
PMI3559	birA	7104250	7103949	529507.PMI3559	529507.PMI3249	0.43	0	0.342	0	0.062	0	0.539	0.109	0.829
birA	PMI0606	7103949	7101390	529507.PMI3249	529507.PMI0606	0.416	0	0	0	0.063	0	0.547	0.388	0.827
birA	gcvP	7103949	7102757	529507.PMI3249	529507.PMI2019	0	0	0	0	0	0	0	0.815	0.815
birA	mnmC	7103949	7102540	529507.PMI3249	529507.PMI1796	0.054	0	0	0	0.061	0	0	0.786	0.793
gcvP	mnmC	7102757	7102540	529507.PMI2019	529507.PMI1796	0	0	0	0	0.06	0	0.752	0.122	0.777
accC	bioB	7104317	7101387	529507.PMI3627	529507.PMI0603	0	0	0	0	0.092	0	0	0.391	0.423
fixA	fixB	7103369	7103368	529507.PMI2653	529507.PMI2652	0.875	0.1	0.778	0	0.853	0.893	0.579	0.815	0.999
fadB	fadE	7104241	7101136	529507.PMI3550	529507.PMI0348	0.478	0	0.597	0	0.663	0.266	0.974	0.651	0.999
fadJ	fadE	7102551	7101136	529507.PMI1807	529507.PMI0348	0.478	0	0.497	0	0.663	0.266	0.974	0.651	0.999
fadB	fadJ	7104241	7102551	529507.PMI3550	529507.PMI1807	0.478	0	0.778	0.757	0.484	0.461	0.974	0.495	0.996
fadB	adhE	7104241	7102232	529507.PMI3550	529507.PMI1486	0.091	0	0	0	0.601	0.128	0.752	0.797	0.981
fadJ	adhE	7102551	7102232	529507.PMI1807	529507.PMI1486	0.091	0	0	0	0.601	0.128	0.752	0.786	0.98
fadH	fadB	7104392	7104241	529507.PMI3702	529507.PMI3550	0.104	0	0.424	0	0.239	0	0.752	0.786	0.975
fadB	fixB	7104241	7103368	529507.PMI3550	529507.PMI2652	0.478	0	0.224	0	0.348	0.384	0.752	0.477	0.973
fixB	fadJ	7103368	7102551	529507.PMI2652	529507.PMI1807	0.478	0	0.212	0	0.348	0.384	0.752	0.477	0.973
fadH	fadJ	7104392	7102551	529507.PMI3702	529507.PMI1807	0.104	0	0.374	0	0.239	0	0.752	0.786	0.973
caiD	fixB	7103374	7103368	529507.PMI2658	529507.PMI2652	0.381	0	0.763	0	0.158	0.183	0.539	0.528	0.972
fadH	gltB	7104392	7104367	529507.PMI3702	529507.PMI3677	0.479	0	0	0	0.069	0	0.752	0.576	0.942
gltB	purL	7104367	7102617	529507.PMI3677	529507.PMI1875	0.047	0	0	0	0.729	0	0	0.786	0.939
caiD	fixA	7103374	7103369	529507.PMI2658	529507.PMI2653	0.381	0	0.763	0	0.154	0	0	0.414	0.917
fadH	adhE	7104392	7102232	529507.PMI3702	529507.PMI1486	0.326	0	0	0	0.084	0	0.4	0.786	0.91
caiD	fadE	7103374	7101136	529507.PMI2658	529507.PMI0348	0.378	0	0	0	0.46	0.266	0.626	0.109	0.902
fadH	fixB	7104392	7103368	529507.PMI3702	529507.PMI2652	0.108	0	0	0	0.085	0.859	0	0.115	0.884
fadH	fixA	7104392	7103369	529507.PMI3702	529507.PMI2653	0.13	0	0	0	0	0.859	0	0.111	0.881
fadB	caiD	7104241	7103374	529507.PMI3550	529507.PMI2658	0.381	0	0.618	0.657	0.225	0.237	0.591	0.109	0.868
fadH	caiD	7104392	7103374	529507.PMI3702	529507.PMI2658	0.064	0.087	0	0	0.123	0	0.752	0.403	0.868
caiD	fadJ	7103374	7102551	529507.PMI2658	529507.PMI1807	0.381	0	0.667	0.692	0.225	0.237	0.591	0.109	0.867
hmp	adhE	7102610	7102232	529507.PMI1868	529507.PMI1486	0	0	0	0	0.347	0	0.539	0.592	0.866
fixA	fadJ	7103369	7102551	529507.PMI2653	529507.PMI1807	0.478	0	0.192	0	0.347	0.183	0	0.475	0.86
fadB	fixA	7104241	7103369	529507.PMI3550	529507.PMI2653	0.478	0	0.167	0	0.347	0.183	0	0.475	0.856
fadH	fadE	7104392	7101136	529507.PMI3702	529507.PMI0348	0.062	0	0.423	0	0.074	0	0.578	0.394	0.848
fadH	hmp	7104392	7102610	529507.PMI3702	529507.PMI1868	0.048	0	0	0	0.252	0	0	0.786	0.834
purL	adhE	7102617	7102232	529507.PMI1875	529507.PMI1486	0.057	0	0	0	0.133	0	0	0.805	0.827
fadH	purL	7104392	7102617	529507.PMI3702	529507.PMI1875	0.103	0	0	0	0.182	0	0	0.782	0.826
fixB	fadE	7103368	7101136	529507.PMI2652	529507.PMI0348	0.381	0	0	0	0.129	0.41	0.392	0.109	0.796
gltB	adhE	7104367	7102232	529507.PMI3677	529507.PMI1486	0.063	0	0	0	0.065	0	0	0.786	0.796
caiD	adhE	7103374	7102232	529507.PMI2658	529507.PMI1486	0.063	0	0	0	0.345	0.128	0.535	0.275	0.786
adhE	fadE	7102232	7101136	529507.PMI1486	529507.PMI0348	0.061	0	0	0	0.225	0	0.539	0.235	0.709
gltB	fadJ	7104367	7102551	529507.PMI3677	529507.PMI1807	0	0	0.157	0	0.085	0	0	0.647	0.703
gltB	fadB	7104367	7104241	529507.PMI3677	529507.PMI3550	0	0	0	0	0.085	0	0	0.647	0.663
fixA	fadE	7103369	7101136	529507.PMI2653	529507.PMI0348	0.381	0	0	0	0.102	0	0.392	0.109	0.658
hmp	fadJ	7102610	7102551	529507.PMI1868	529507.PMI1807	0.067	0	0	0	0.054	0	0.539	0.115	0.591
fadB	hmp	7104241	7102610	529507.PMI3550	529507.PMI1868	0.067	0	0	0	0.054	0	0.539	0.115	0.591
fixA	adhE	7103369	7102232	529507.PMI2653	529507.PMI1486	0.062	0	0	0	0.091	0	0.527	0	0.561
caiD	hmp	7103374	7102610	529507.PMI2658	529507.PMI1868	0.047	0	0	0	0	0	0.539	0.042	0.542
lpdA	sucB	7102780	7101354	529507.PMI2044	529507.PMI0570	0.381	0.142	0.744	0	0.55	0.741	0.965	0.614	0.999
aceF	lpdA	7102781	7102780	529507.PMI2045	529507.PMI2044	0.67	0.085	0.776	0	0.55	0.75	0.965	0.653	0.999
gcvT	gcvP	7102759	7102757	529507.PMI2021	529507.PMI2019	0.728	0.061	0.77	0	0.999	0	0.974	0.646	0.999
gcvH	gcvP	7102758	7102757	529507.PMI2020	529507.PMI2019	0.762	0	0.738	0	0.997	0.215	0.948	0.686	0.999
PMI2909	gcvP	7103625	7102757	529507.PMI2909	529507.PMI2019	0.469	0	0.71	0	0.999	0	0.974	0.494	0.999
sucB	sucA	7101354	7101353	529507.PMI0570	529507.PMI0569	0.879	0.432	0.778	0	0.73	0.834	0.965	0.758	0.999
PMI2909	gcvH	7103625	7102758	529507.PMI2909	529507.PMI2020	0.347	0	0.777	0	0.985	0.664	0.539	0.109	0.999
aceE	aceF	7102782	7102781	529507.PMI2046	529507.PMI2045	0.882	0.016	0.75	0	0.667	0.848	0.965	0.703	0.999
gcvT	gcvH	7102759	7102758	529507.PMI2021	529507.PMI2020	0.826	0	0.778	0	0.985	0.664	0.912	0.508	0.999
gcvT	glyA	7102759	7102609	529507.PMI2021	529507.PMI1867	0.381	0.727	0	0	0.578	0.169	0.965	0.472	0.998
gcvP	glyA	7102757	7102609	529507.PMI2019	529507.PMI1867	0.478	0	0	0	0.811	0	0.974	0.523	0.998
aceE	lpdA	7102782	7102780	529507.PMI2046	529507.PMI2044	0.658	0	0.641	0	0.392	0.13	0.965	0.624	0.998
lpdA	sucA	7102780	7101353	529507.PMI2044	529507.PMI0569	0.381	0	0.166	0	0.163	0.616	0.965	0.673	0.997
aceF	sucA	7102781	7101353	529507.PMI2045	529507.PMI0569	0.341	0.02	0.355	0	0.662	0.834	0.624	0.654	0.996
lpdA	gcvP	7102780	7102757	529507.PMI2044	529507.PMI2019	0.478	0	0	0	0.124	0	0.974	0.495	0.993
gcvH	glyA	7102758	7102609	529507.PMI2020	529507.PMI1867	0.381	0	0	0	0.34	0	0.956	0.569	0.991
lpdA	gcvT	7102780	7102759	529507.PMI2044	529507.PMI2021	0.381	0	0.249	0	0.13	0	0.965	0.122	0.985
lpdA	glyA	7102780	7102609	529507.PMI2044	529507.PMI1867	0.09	0	0.217	0	0.067	0.119	0.965	0.38	0.984
PMI2909	lpdA	7103625	7102780	529507.PMI2909	529507.PMI2044	0.381	0	0.221	0	0.13	0	0.952	0.109	0.979
poxB	aceE	7103935	7102782	529507.PMI3235	529507.PMI2046	0	0	0.156	0	0	0.12	0.965	0.114	0.974
poxB	lpdA	7103935	7102780	529507.PMI3235	529507.PMI2044	0	0	0	0	0.063	0	0.965	0.177	0.971
lpdA	gcvH	7102780	7102758	529507.PMI2044	529507.PMI2020	0.381	0	0.4	0	0.062	0	0.912	0.183	0.97
poxB	aceF	7103935	7102781	529507.PMI3235	529507.PMI2045	0	0	0	0	0.062	0	0.965	0.109	0.969
aceE	sucB	7102782	7101354	529507.PMI2046	529507.PMI0570	0.381	0	0	0	0.38	0.667	0.584	0.124	0.944
PMI2909	glyA	7103625	7102609	529507.PMI2909	529507.PMI1867	0.381	0	0	0	0.578	0.169	0.539	0.109	0.894
gcvP	sucB	7102757	7101354	529507.PMI2019	529507.PMI0570	0.067	0	0	0	0.086	0	0.752	0.456	0.869
aceF	gcvP	7102781	7102757	529507.PMI2045	529507.PMI2019	0.067	0	0	0	0.086	0	0.752	0.401	0.856
aceF	sucB	7102781	7101354	529507.PMI2045	529507.PMI0570	0	0	0.772	0.729	0.063	0	0.584	0.389	0.709
gcvH	sucB	7102758	7101354	529507.PMI2020	529507.PMI0570	0.059	0	0.182	0	0.062	0	0.539	0.176	0.675
PMI2909	sucB	7103625	7101354	529507.PMI2909	529507.PMI0570	0.061	0	0.15	0	0.084	0.122	0.539	0.071	0.661
gcvP	sucA	7102757	7101353	529507.PMI2019	529507.PMI0569	0	0	0.166	0	0.259	0	0	0.487	0.655
PMI2909	gcvT	7103625	7102759	529507.PMI2909	529507.PMI2021	0	0	0.778	0.619	0	0	0.495	0	0.642
poxB	sucB	7103935	7101354	529507.PMI3235	529507.PMI0570	0	0	0	0	0.062	0	0.584	0.143	0.636
gcvT	sucB	7102759	7101354	529507.PMI2021	529507.PMI0570	0.106	0	0	0	0.084	0.122	0.539	0.071	0.635
PMI2909	aceF	7103625	7102781	529507.PMI2909	529507.PMI2045	0.061	0	0	0	0.084	0.122	0.539	0.071	0.617
aceF	gcvT	7102781	7102759	529507.PMI2045	529507.PMI2021	0.061	0	0	0	0.084	0.122	0.539	0.071	0.617
aceF	gcvH	7102781	7102758	529507.PMI2045	529507.PMI2020	0.058	0	0	0	0.062	0	0.539	0.109	0.588
gcvH	sucA	7102758	7101353	529507.PMI2020	529507.PMI0569	0	0	0	0	0	0	0.539	0.14	0.586
aceE	sucA	7102782	7101353	529507.PMI2046	529507.PMI0569	0.043	0	0.17	0	0	0	0.389	0.177	0.547
glyA	sucB	7102609	7101354	529507.PMI1867	529507.PMI0570	0.043	0	0	0	0.157	0	0.25	0.187	0.442
sucB	sucA	7101354	7101353	529507.PMI0570	529507.PMI0569	0.879	0.432	0.778	0	0.73	0.834	0.965	0.758	0.999
nadE	nadD	7102613	7101217	529507.PMI1871	529507.PMI0430	0.478	0	0	0	0.063	0	0.974	0.729	0.996
aceF	sucA	7102781	7101353	529507.PMI2045	529507.PMI0569	0.341	0.02	0.355	0	0.662	0.834	0.624	0.654	0.996
nadR	nadE	7103239	7102613	529507.PMI2505	529507.PMI1871	0.125	0	0	0	0	0	0.974	0.786	0.994
nudC	nadE	7103491	7102613	529507.PMI2775	529507.PMI1871	0	0	0	0	0.13	0	0.974	0	0.976
sthA	sucB	7103942	7101354	529507.PMI3242	529507.PMI0570	0.376	0.055	0.316	0	0.55	0.741	0.547	0.109	0.975
sthA	aceF	7103942	7102781	529507.PMI3242	529507.PMI2045	0.376	0.005	0.211	0	0.55	0.741	0.547	0.109	0.971
nadR	nadD	7103239	7101217	529507.PMI2505	529507.PMI0430	0.044	0	0	0	0	0	0.9	0.653	0.963
nadK	nadD	7102643	7101217	529507.PMI1901	529507.PMI0430	0.089	0	0.157	0	0.077	0	0.9	0.558	0.962
nadR	nadK	7103239	7102643	529507.PMI2505	529507.PMI1901	0	0	0	0	0.063	0	0.9	0.578	0.957
sthA	gcvP	7103942	7102757	529507.PMI3242	529507.PMI2019	0.478	0	0	0	0.124	0	0.752	0.495	0.935
nadK	nadE	7102643	7102613	529507.PMI1901	529507.PMI1871	0.056	0	0.16	0	0.105	0	0.9	0.178	0.931
sthA	sucA	7103942	7101353	529507.PMI3242	529507.PMI0569	0.381	0	0.194	0	0.163	0.616	0.547	0.109	0.92
sthA	nadK	7103942	7102643	529507.PMI3242	529507.PMI1901	0.047	0	0	0	0.062	0	0.911	0.089	0.918
sthA	nadE	7103942	7102613	529507.PMI3242	529507.PMI1871	0.061	0	0	0	0.109	0	0.9	0.124	0.916
aceF	maeB	7102781	7102298	529507.PMI2045	529507.PMI1552	0.3	0	0	0	0.129	0	0.752	0.486	0.911
maeB	sucB	7102298	7101354	529507.PMI1552	529507.PMI0570	0.3	0	0	0	0.129	0	0.752	0.486	0.911
sthA	maeB	7103942	7102298	529507.PMI3242	529507.PMI1552	0.321	0	0	0	0.103	0	0.752	0.482	0.911
nudC	nadR	7103491	7103239	529507.PMI2775	529507.PMI2505	0	0	0	0	0	0	0.9	0.11	0.907
sthA	nadR	7103942	7103239	529507.PMI3242	529507.PMI2505	0.044	0	0	0	0	0	0.9	0.075	0.903
nudC	nadK	7103491	7102643	529507.PMI2775	529507.PMI1901	0	0	0	0	0.069	0	0.9	0	0.902
sthA	nudC	7103942	7103491	529507.PMI3242	529507.PMI2775	0	0	0	0	0.064	0	0.9	0	0.902
sthA	nadD	7103942	7101217	529507.PMI3242	529507.PMI0430	0	0	0	0	0	0	0.9	0.06	0.901
gcvP	sucB	7102757	7101354	529507.PMI2019	529507.PMI0570	0.067	0	0	0	0.086	0	0.752	0.456	0.869
aceF	gcvP	7102781	7102757	529507.PMI2045	529507.PMI2019	0.067	0	0	0	0.086	0	0.752	0.401	0.856
nudC	nadD	7103491	7101217	529507.PMI2775	529507.PMI0430	0	0	0	0	0.063	0	0.8	0.063	0.809
gcvP	maeB	7102757	7102298	529507.PMI2019	529507.PMI1552	0.06	0	0	0	0	0	0	0.786	0.79
aceF	sucB	7102781	7101354	529507.PMI2045	529507.PMI0570	0	0	0.772	0.729	0.063	0	0.584	0.389	0.709
gcvP	sucA	7102757	7101353	529507.PMI2019	529507.PMI0569	0	0	0.166	0	0.259	0	0	0.487	0.655
maeB	sucA	7102298	7101353	529507.PMI1552	529507.PMI0569	0.104	0	0	0	0.125	0	0	0.387	0.477
nadK	maeB	7102643	7102298	529507.PMI1901	529507.PMI1552	0.133	0	0	0	0.064	0.274	0	0.109	0.404
sucB	sucA	7101354	7101353	529507.PMI0570	529507.PMI0569	0.879	0.432	0.778	0	0.73	0.834	0.965	0.758	0.999
aceF	sucA	7102781	7101353	529507.PMI2045	529507.PMI0569	0.341	0.02	0.355	0	0.662	0.834	0.624	0.654	0.996
gor	sucB	7103551	7101354	529507.PMI2835	529507.PMI0570	0.376	0.02	0.39	0	0.55	0.741	0.581	0.109	0.979
gor	aceF	7103551	7102781	529507.PMI2835	529507.PMI2045	0.376	0.003	0.285	0	0.55	0.741	0.539	0.109	0.973
gshB	ggt	7101128	7100872	529507.PMI0340	529507.PMI0072	0	0	0	0	0	0	0.965	0.216	0.972
gor	gshB	7103551	7101128	529507.PMI2835	529507.PMI0340	0	0	0	0	0.156	0	0.9	0.672	0.969
trxA	gor	7104013	7103551	529507.PMI3313	529507.PMI2835	0.054	0	0	0	0.127	0.663	0.539	0.768	0.964
gor	gcvP	7103551	7102757	529507.PMI2835	529507.PMI2019	0.478	0	0.15	0	0.124	0	0.752	0.495	0.942
gor	gst	7103551	7102130	529507.PMI2835	529507.PMI1384	0	0	0	0	0.096	0.119	0.9	0.115	0.92
gst	ggt	7102130	7100872	529507.PMI1384	529507.PMI0072	0.06	0	0.154	0	0.061	0	0.9	0.083	0.919
gor	ggt	7103551	7100872	529507.PMI2835	529507.PMI0072	0	0	0	0	0.059	0	0.9	0.152	0.913
gor	sucA	7103551	7101353	529507.PMI2835	529507.PMI0569	0.381	0	0	0	0.163	0.616	0.581	0.109	0.912
maeB	sucB	7102298	7101354	529507.PMI1552	529507.PMI0570	0.3	0	0	0	0.129	0	0.752	0.486	0.911
gor	maeB	7103551	7102298	529507.PMI2835	529507.PMI1552	0.321	0	0	0	0.103	0	0.752	0.482	0.911
aceF	maeB	7102781	7102298	529507.PMI2045	529507.PMI1552	0.3	0	0	0	0.129	0	0.752	0.486	0.911
gor	gsp	7103551	7100981	529507.PMI2835	529507.PMI0183	0	0	0	0	0.063	0	0.9	0.073	0.905
gshB	gsp	7101128	7100981	529507.PMI0340	529507.PMI0183	0	0	0	0	0.063	0	0.9	0	0.902
gst	gshB	7102130	7101128	529507.PMI1384	529507.PMI0340	0.059	0	0	0	0	0	0.9	0	0.901
gst	gsp	7102130	7100981	529507.PMI1384	529507.PMI0183	0	0	0	0	0	0	0.9	0	0.9
gsp	ggt	7100981	7100872	529507.PMI0183	529507.PMI0072	0	0	0	0	0	0	0.9	0	0.9
gcvP	sucB	7102757	7101354	529507.PMI2019	529507.PMI0570	0.067	0	0	0	0.086	0	0.752	0.456	0.869
aceF	gcvP	7102781	7102757	529507.PMI2045	529507.PMI2019	0.067	0	0	0	0.086	0	0.752	0.401	0.856
gcvP	maeB	7102757	7102298	529507.PMI2019	529507.PMI1552	0.06	0	0	0	0	0	0	0.786	0.79
aceF	sucB	7102781	7101354	529507.PMI2045	529507.PMI0570	0	0	0.772	0.729	0.063	0	0.584	0.389	0.709
gcvP	sucA	7102757	7101353	529507.PMI2019	529507.PMI0569	0	0	0.166	0	0.259	0	0	0.487	0.655
trxA	maeB	7104013	7102298	529507.PMI3313	529507.PMI1552	0.084	0	0	0	0.062	0.173	0	0.42	0.532
maeB	sucA	7102298	7101353	529507.PMI1552	529507.PMI0569	0.104	0	0	0	0.125	0	0	0.387	0.477
rplF	rplB	7103970	7103958	529507.PMI3270	529507.PMI3258	0.562	0	0.47	0	0.985	0.941	0.547	0.787	0.999
rplE	rpmC	7103967	7103963	529507.PMI3267	529507.PMI3263	0.644	0	0.22	0	0.985	0.929	0.547	0.381	0.999
rplO	rplF	7103974	7103970	529507.PMI3274	529507.PMI3270	0.857	0	0.265	0	0.985	0.941	0.547	0.803	0.999
rplO	rpmC	7103974	7103963	529507.PMI3274	529507.PMI3263	0.583	0	0	0	0.985	0.89	0.547	0.642	0.999
rplF	rpsG	7103970	7103510	529507.PMI3270	529507.PMI2794	0.381	0	0.166	0	0.985	0.746	0.547	0.781	0.999
rplO	rplW	7103974	7103957	529507.PMI3274	529507.PMI3257	0.543	0	0	0	0.985	0.89	0.547	0.704	0.999
rplE	rpsG	7103967	7103510	529507.PMI3267	529507.PMI2794	0.381	0	0.639	0	0.985	0.864	0.547	0.753	0.999
rplF	rplW	7103970	7103957	529507.PMI3270	529507.PMI3257	0.551	0	0	0	0.985	0.929	0.547	0.774	0.999
rpmC	rplW	7103963	7103957	529507.PMI3263	529507.PMI3257	0.759	0	0	0	0.985	0.945	0.547	0.707	0.999
rplO	rplB	7103974	7103958	529507.PMI3274	529507.PMI3258	0.553	0	0	0	0.985	0.945	0.547	0.655	0.999
rplF	rplE	7103970	7103967	529507.PMI3270	529507.PMI3267	0.774	0	0.552	0	0.985	0.945	0.547	0.833	0.999
rplW	rpsG	7103957	7103510	529507.PMI3257	529507.PMI2794	0.381	0	0	0	0.985	0.745	0.547	0.658	0.999
rplF	rpmC	7103970	7103963	529507.PMI3270	529507.PMI3263	0.595	0	0	0	0.985	0.929	0.547	0.581	0.999
rpmC	rplB	7103963	7103958	529507.PMI3263	529507.PMI3258	0.789	0	0	0	0.985	0.93	0.547	0.559	0.999
rplO	rplE	7103974	7103967	529507.PMI3274	529507.PMI3267	0.75	0	0	0	0.985	0.941	0.547	0.783	0.999
rplE	rplB	7103967	7103958	529507.PMI3267	529507.PMI3258	0.601	0	0.393	0	0.985	0.941	0.547	0.788	0.999
rplB	rplW	7103958	7103957	529507.PMI3258	529507.PMI3257	0.85	0	0.32	0	0.985	0.945	0.547	0.799	0.999
rplB	rpsG	7103958	7103510	529507.PMI3258	529507.PMI2794	0.381	0	0.198	0	0.985	0.748	0.547	0.785	0.999
rplO	rpsG	7103974	7103510	529507.PMI3274	529507.PMI2794	0.381	0	0	0	0.985	0.744	0.547	0.774	0.999
rplE	rplW	7103967	7103957	529507.PMI3267	529507.PMI3257	0.587	0	0	0	0.985	0.944	0.547	0.644	0.999
rpmC	rpsG	7103963	7103510	529507.PMI3263	529507.PMI2794	0.381	0	0	0	0.985	0.764	0.547	0.381	0.999
rplF	tig	7103970	7100913	529507.PMI3270	529507.PMI0114	0.057	0	0	0	0.543	0.945	0	0.061	0.974
rplB	tig	7103958	7100913	529507.PMI3258	529507.PMI0114	0.051	0	0	0	0.486	0.945	0	0.177	0.974
rplE	tig	7103967	7100913	529507.PMI3267	529507.PMI0114	0.055	0	0	0	0.478	0.945	0	0.066	0.971
rplW	tig	7103957	7100913	529507.PMI3257	529507.PMI0114	0.051	0	0	0	0.478	0.939	0	0.081	0.968
rplO	tig	7103974	7100913	529507.PMI3274	529507.PMI0114	0.06	0	0	0	0.467	0.927	0	0.085	0.962
rpmC	tig	7103963	7100913	529507.PMI3263	529507.PMI0114	0.055	0	0	0	0.384	0.93	0	0.121	0.959
rplB	PMI1234	7103958	7101980	529507.PMI3258	529507.PMI1234	0	0	0	0	0.07	0.929	0	0	0.931
rplF	PMI1234	7103970	7101980	529507.PMI3270	529507.PMI1234	0	0	0	0	0.06	0.929	0	0	0.93
rpmC	PMI1234	7103963	7101980	529507.PMI3263	529507.PMI1234	0.043	0	0	0	0.058	0.929	0	0	0.93
rplW	PMI1234	7103957	7101980	529507.PMI3257	529507.PMI1234	0	0	0	0	0.059	0.929	0	0	0.93
rplE	PMI1234	7103967	7101980	529507.PMI3267	529507.PMI1234	0	0	0	0	0.059	0.929	0	0	0.93
PMI1234	tig	7101980	7100913	529507.PMI1234	529507.PMI0114	0	0	0	0	0	0.929	0	0.046	0.929
rplW	pbpA	7103957	7101213	529507.PMI3257	529507.PMI0426	0	0	0	0	0	0.929	0	0	0.929
rplE	pbpA	7103967	7101213	529507.PMI3267	529507.PMI0426	0	0	0	0	0	0.928	0	0.062	0.929
rplF	pbpA	7103970	7101213	529507.PMI3270	529507.PMI0426	0	0	0	0	0	0.928	0	0.042	0.928
pbpA	tig	7101213	7100913	529507.PMI0426	529507.PMI0114	0.045	0	0	0	0	0.928	0	0	0.928
rpmC	pbpA	7103963	7101213	529507.PMI3263	529507.PMI0426	0	0	0	0	0	0.928	0	0	0.928
PMI1234	pbpA	7101980	7101213	529507.PMI1234	529507.PMI0426	0	0	0	0	0	0.928	0	0	0.928
rplB	pbpA	7103958	7101213	529507.PMI3258	529507.PMI0426	0	0	0	0	0	0.928	0	0	0.928
clpP	tig	7100914	7100913	529507.PMI0115	529507.PMI0114	0.633	0	0.193	0	0.092	0.128	0	0.688	0.913
rpsG	tig	7103510	7100913	529507.PMI2794	529507.PMI0114	0.043	0	0	0	0.398	0.818	0	0.178	0.902
rplO	PMI1234	7103974	7101980	529507.PMI3274	529507.PMI1234	0	0	0	0	0	0.78	0	0	0.78
rplO	pbpA	7103974	7101213	529507.PMI3274	529507.PMI0426	0	0	0	0	0	0.768	0	0	0.768
ptsG	PMI2226	7103025	7102959	529507.PMI2292	529507.PMI2226	0.479	0.008	0.662	0	0.131	0.945	0.752	0.786	0.999
crr	treB	7102572	7101085	529507.PMI1830	529507.PMI0291	0.478	0.842	0.487	0	0.131	0.941	0.948	0.495	0.999
PMI2227	PMI2226	7102960	7102959	529507.PMI2227	529507.PMI2226	0.771	0	0.778	0	0	0.945	0	0.786	0.999
ptsG	crr	7103025	7102572	529507.PMI2292	529507.PMI1830	0.478	0.858	0.778	0	0.131	0.941	0.948	0.507	0.999
dhaM	nagE	7103137	7101242	529507.PMI2404	529507.PMI0455	0.479	0	0.252	0	0.268	0.939	0.576	0.786	0.998
PMI2982	crr	7103698	7102572	529507.PMI2982	529507.PMI1830	0.381	0.572	0.778	0	0.085	0.747	0.912	0.164	0.998
nagE	treB	7101242	7101085	529507.PMI0455	529507.PMI0291	0.479	0.005	0.283	0	0.131	0.945	0.752	0.786	0.998
PMI2226	nagE	7102959	7101242	529507.PMI2226	529507.PMI0455	0.479	0	0.734	0.612	0.28	0.945	0.752	0.786	0.997
dhaM	PMI2226	7103137	7102959	529507.PMI2404	529507.PMI2226	0.479	0	0	0	0.268	0.939	0.576	0.786	0.997
PMI2226	hpr	7102959	7102570	529507.PMI2226	529507.PMI1828	0.479	0	0	0	0.132	0.635	0.911	0.786	0.996
PMI2226	treB	7102959	7101085	529507.PMI2226	529507.PMI0291	0.479	0	0.777	0.675	0.131	0.945	0.752	0.786	0.996
hpr	nagE	7102570	7101242	529507.PMI1828	529507.PMI0455	0.479	0	0.182	0	0.124	0.635	0.911	0.786	0.996
PMI2227	nagE	7102960	7101242	529507.PMI2227	529507.PMI0455	0.479	0	0.558	0	0	0.945	0	0.786	0.996
PMI2982	PMI2226	7103698	7102959	529507.PMI2982	529507.PMI2226	0.478	0.004	0.736	0	0.085	0.844	0.752	0.481	0.996
PMI2226	crr	7102959	7102572	529507.PMI2226	529507.PMI1830	0.478	0	0.773	0.793	0.131	0.941	0.752	0.495	0.994
crr	hpr	7102572	7102570	529507.PMI1830	529507.PMI1828	0.64	0	0.344	0	0.23	0.635	0.807	0.65	0.994
ptsG	nagE	7103025	7101242	529507.PMI2292	529507.PMI0455	0.479	0	0.778	0.837	0.131	0.945	0.752	0.786	0.994
crr	nagE	7102572	7101242	529507.PMI1830	529507.PMI0455	0.478	0	0.778	0.927	0.131	0.941	0.752	0.536	0.993
PMI3515	nagE	7104207	7101242	529507.PMI3515	529507.PMI0455	0.478	0.002	0.409	0	0.085	0.844	0.752	0.481	0.993
dhaM	crr	7103137	7102572	529507.PMI2404	529507.PMI1830	0.479	0.085	0.23	0	0.125	0.939	0.079	0.578	0.99
ptsO	nagE	7104334	7101242	529507.PMI3644	529507.PMI0455	0.479	0	0	0	0.124	0.635	0.576	0.865	0.988
PMI3515	PMI2226	7104207	7102959	529507.PMI3515	529507.PMI2226	0.478	0	0.777	0.69	0.085	0.844	0.752	0.481	0.986
PMI2982	nagE	7103698	7101242	529507.PMI2982	529507.PMI0455	0.478	0	0.778	0.7	0.085	0.844	0.752	0.481	0.986
ptsG	treB	7103025	7101085	529507.PMI2292	529507.PMI0291	0.478	0	0.191	0	0.059	0.747	0.752	0.466	0.983
ptsO	PMI2226	7104334	7102959	529507.PMI3644	529507.PMI2226	0.479	0	0	0	0.124	0.635	0.576	0.786	0.982
PMI3515	crr	7104207	7102572	529507.PMI3515	529507.PMI1830	0.381	0.602	0.585	0	0.085	0.601	0.539	0.109	0.98
hpr	treB	7102570	7101085	529507.PMI1828	529507.PMI0291	0.45	0	0	0	0.132	0.461	0.875	0.488	0.98
PMI2227	treB	7102960	7101085	529507.PMI2227	529507.PMI0291	0.475	0	0.599	0	0	0.84	0	0.419	0.977
ptsG	PMI2227	7103025	7102960	529507.PMI2292	529507.PMI2227	0.475	0	0.506	0	0	0.84	0	0.419	0.972
ptsG	hpr	7103025	7102570	529507.PMI2292	529507.PMI1828	0.45	0	0.255	0	0.084	0	0.875	0.488	0.971
PMI2982	ptsG	7103698	7103025	529507.PMI2982	529507.PMI2292	0.381	0	0.778	0.755	0	0.311	0.903	0.109	0.964
ptsO	dhaM	7104334	7103137	529507.PMI3644	529507.PMI2404	0.477	0	0.43	0	0.164	0.732	0.393	0.111	0.955
dhaM	PMI2227	7103137	7102960	529507.PMI2404	529507.PMI2227	0.463	0	0	0	0	0.859	0	0.455	0.955
PMI2982	treB	7103698	7101085	529507.PMI2982	529507.PMI0291	0.381	0	0.26	0	0.059	0.747	0.581	0.164	0.952
dhaM	ptsG	7103137	7103025	529507.PMI2404	529507.PMI2292	0.479	0	0.271	0	0.134	0	0.403	0.786	0.95
dhaM	treB	7103137	7101085	529507.PMI2404	529507.PMI0291	0.479	0	0	0	0.134	0	0.403	0.786	0.934
dhaM	hpr	7103137	7102570	529507.PMI2404	529507.PMI1828	0.477	0	0.632	0.801	0.164	0.732	0.393	0.111	0.93
PMI2982	hpr	7103698	7102570	529507.PMI2982	529507.PMI1828	0.381	0	0.18	0	0.063	0	0.804	0.109	0.902
PMI3515	PMI2227	7104207	7102960	529507.PMI3515	529507.PMI2227	0.375	0	0.723	0	0	0.438	0	0.099	0.9
PMI3515	hpr	7104207	7102570	529507.PMI3515	529507.PMI1828	0.381	0	0	0	0.063	0	0.804	0.109	0.885
PMI2227	crr	7102960	7102572	529507.PMI2227	529507.PMI1830	0.367	0	0.616	0	0	0.462	0	0.147	0.873
PMI2982	PMI2227	7103698	7102960	529507.PMI2982	529507.PMI2227	0.381	0	0.598	0	0	0.438	0	0.128	0.861
PMI3515	treB	7104207	7101085	529507.PMI3515	529507.PMI0291	0.381	0	0.777	0.654	0	0.311	0.539	0.109	0.846
PMI3515	ptsG	7104207	7103025	529507.PMI3515	529507.PMI2292	0.381	0	0.23	0	0	0.311	0.539	0.109	0.84
ptsO	treB	7104334	7101085	529507.PMI3644	529507.PMI0291	0.45	0	0	0	0.084	0	0.403	0.488	0.825
ptsO	ptsG	7104334	7103025	529507.PMI3644	529507.PMI2292	0.45	0	0	0	0.084	0	0.403	0.488	0.825
PMI2982	dhaM	7103698	7103137	529507.PMI2982	529507.PMI2404	0.479	0	0.215	0	0.089	0	0.064	0.573	0.823
ptsO	crr	7104334	7102572	529507.PMI3644	529507.PMI1830	0.378	0	0	0	0.068	0.635	0.079	0.109	0.794
PMI3515	dhaM	7104207	7103137	529507.PMI3515	529507.PMI2404	0.479	0	0	0	0.089	0	0.064	0.573	0.784
ptsO	hpr	7104334	7102570	529507.PMI3644	529507.PMI1828	0	0	0.714	0	0	0	0	0	0.714
PMI2227	hpr	7102960	7102570	529507.PMI2227	529507.PMI1828	0.299	0	0	0	0	0.455	0	0.069	0.613
ptsO	PMI2227	7104334	7102960	529507.PMI3644	529507.PMI2227	0.299	0	0	0	0	0.455	0	0.069	0.613
PMI3515	PMI2982	7104207	7103698	529507.PMI3515	529507.PMI2982	0	0	0.561	0	0	0	0	0	0.561
ptsO	PMI2982	7104334	7103698	529507.PMI3644	529507.PMI2982	0.381	0	0	0	0.063	0	0.064	0.109	0.451
ptsO	PMI3515	7104334	7104207	529507.PMI3644	529507.PMI3515	0.381	0	0	0	0.063	0	0.064	0.109	0.451
rpoA	rpoC	7103980	7103500	529507.PMI3280	529507.PMI2784	0.381	0	0.38	0	0.602	0.931	0.903	0.757	0.999
rpoB	rpoC	7103501	7103500	529507.PMI2785	529507.PMI2784	0.693	0.898	0.776	0	0.985	0.945	0.903	0.834	0.999
grpE	dnaK	7102642	7100811	529507.PMI1900	529507.PMI0009	0.381	0	0.769	0	0.844	0.945	0.071	0.865	0.999
rpoA	rpoB	7103980	7103501	529507.PMI3280	529507.PMI2785	0.381	0	0.296	0	0.814	0.89	0.903	0.752	0.999
rpoZ	rpoC	7103579	7103500	529507.PMI2863	529507.PMI2784	0.042	0	0	0	0.127	0.945	0.903	0.633	0.998
rpoA	rpoZ	7103980	7103579	529507.PMI3280	529507.PMI2863	0.381	0	0	0	0.447	0.89	0.903	0.469	0.997
rpoZ	rpoB	7103579	7103501	529507.PMI2863	529507.PMI2785	0	0	0	0	0.154	0.94	0.903	0.126	0.995
rpoZ	relA	7103579	7101013	529507.PMI2863	529507.PMI0217	0.347	0	0	0	0.061	0.187	0.9	0.075	0.945
crp	rpoS	7103536	7102969	529507.PMI2820	529507.PMI2236	0	0	0	0	0	0.69	0	0.799	0.935
rpoC	rpoS	7103500	7102969	529507.PMI2784	529507.PMI2236	0.061	0	0	0	0.063	0.888	0	0.381	0.93
rpoC	relA	7103500	7101013	529507.PMI2784	529507.PMI0217	0.053	0	0	0	0	0.215	0.9	0.162	0.929
rpoB	relA	7103501	7101013	529507.PMI2785	529507.PMI0217	0.057	0	0	0	0	0.13	0.9	0.15	0.921
rpoB	rpoS	7103501	7102969	529507.PMI2785	529507.PMI2236	0.059	0	0	0	0.063	0.854	0	0.452	0.92
rpoA	relA	7103980	7101013	529507.PMI3280	529507.PMI0217	0.059	0	0	0	0	0	0.9	0.162	0.914
rpoA	rpoS	7103980	7102969	529507.PMI3280	529507.PMI2236	0.051	0	0	0	0.06	0.86	0	0.388	0.913
rpoB	dnaK	7103501	7100811	529507.PMI2785	529507.PMI0009	0	0	0	0	0.088	0.22	0.537	0.765	0.912
rpoA	dnaK	7103980	7100811	529507.PMI3280	529507.PMI0009	0.057	0	0	0	0.063	0.226	0.538	0.749	0.906
rpoS	dnaK	7102969	7100811	529507.PMI2236	529507.PMI0009	0.045	0	0	0	0.065	0.375	0	0.83	0.892
rpoC	dnaK	7103500	7100811	529507.PMI2784	529507.PMI0009	0	0	0.162	0	0.085	0.131	0.528	0.702	0.889
rpoA	crp	7103980	7103536	529507.PMI3280	529507.PMI2820	0	0	0	0	0.059	0.864	0	0.119	0.877
rpoS	relA	7102969	7101013	529507.PMI2236	529507.PMI0217	0.061	0	0.219	0	0.062	0.122	0	0.826	0.875
rpoS	ada	7102969	7101986	529507.PMI2236	529507.PMI1240	0.048	0	0	0	0	0.842	0	0.131	0.857
rpoS	grpE	7102969	7102642	529507.PMI2236	529507.PMI1900	0	0	0	0	0.063	0.449	0	0.746	0.857
rpoS	dsbB	7102969	7102258	529507.PMI2236	529507.PMI1512	0	0	0	0	0	0.849	0	0.078	0.854
rpoZ	rpoS	7103579	7102969	529507.PMI2863	529507.PMI2236	0	0	0	0	0.06	0.834	0	0.13	0.852
rpoZ	crp	7103579	7103536	529507.PMI2863	529507.PMI2820	0	0	0	0	0	0.834	0	0.045	0.834
crp	rpoC	7103536	7103500	529507.PMI2820	529507.PMI2784	0	0	0	0	0.049	0.747	0	0.042	0.749
rpoZ	dnaK	7103579	7100811	529507.PMI2863	529507.PMI0009	0.058	0	0	0	0.063	0.119	0.539	0.109	0.622
rpoA	grpE	7103980	7102642	529507.PMI3280	529507.PMI1900	0.05	0	0.28	0	0.133	0	0	0.381	0.583
hemC	hemD	7104032	7104031	529507.PMI3332	529507.PMI3331	0.89	0	0.309	0	0.479	0.366	0.965	0.741	0.999
hemE	hemF	7103490	7102581	529507.PMI2774	529507.PMI1839	0.381	0	0.311	0	0.606	0	0.965	0.612	0.997
hemC	hemE	7104032	7103490	529507.PMI3332	529507.PMI2774	0.381	0.754	0.707	0	0.577	0.366	0	0.733	0.996
hemC	PMI2247	7104032	7102980	529507.PMI3332	529507.PMI2247	0.478	0.749	0.728	0	0.095	0	0.733	0.583	0.995
hemN	hemE	7103601	7103490	529507.PMI2885	529507.PMI2774	0.381	0	0.48	0	0.063	0	0.965	0.663	0.995
hemC	PMI1477	7104032	7102223	529507.PMI3332	529507.PMI1477	0.478	0.68	0.741	0	0.095	0	0.733	0.583	0.994
hemD	PMI2247	7104031	7102980	529507.PMI3331	529507.PMI2247	0.478	0	0	0	0.132	0	0.974	0.493	0.993
hemD	hemX	7104031	7104030	529507.PMI3331	529507.PMI3330	0.847	0.427	0.252	0	0.103	0	0.9	0.11	0.993
hemD	PMI1477	7104031	7102223	529507.PMI3331	529507.PMI1477	0.478	0	0	0	0.132	0	0.974	0.493	0.993
hemD	hemE	7104031	7103490	529507.PMI3331	529507.PMI2774	0.381	0	0.196	0	0.084	0	0.965	0.563	0.991
hemE	yggW	7103490	7101120	529507.PMI2774	529507.PMI0332	0.304	0	0.217	0	0.063	0	0.965	0.38	0.987
PMI2247	PMI1477	7102980	7102223	529507.PMI2247	529507.PMI1477	0.478	0	0.778	0.939	0.084	0	0.974	0.495	0.987
hemE	PMI2247	7103490	7102980	529507.PMI2774	529507.PMI2247	0.062	0	0	0	0	0	0.956	0.645	0.984
hemE	PMI1477	7103490	7102223	529507.PMI2774	529507.PMI1477	0.062	0	0	0	0	0	0.956	0.645	0.984
hemC	hemL	7104032	7101001	529507.PMI3332	529507.PMI0205	0.381	0	0.777	0	0.573	0	0	0.736	0.982
hemX	PMI1477	7104030	7102223	529507.PMI3330	529507.PMI1477	0	0	0	0	0.063	0	0.974	0.118	0.976
hemX	PMI2247	7104030	7102980	529507.PMI3330	529507.PMI2247	0	0	0	0	0.063	0	0.974	0.118	0.976
hemE	hemH	7103490	7102917	529507.PMI2774	529507.PMI2183	0.381	0	0.738	0	0.167	0	0	0.839	0.975
hemE	hemL	7103490	7101001	529507.PMI2774	529507.PMI0205	0.381	0	0.454	0	0.567	0	0	0.762	0.96
hemX	hemE	7104030	7103490	529507.PMI3330	529507.PMI2774	0.049	0	0	0	0.063	0	0.956	0.064	0.958
hemN	hemF	7103601	7102581	529507.PMI2885	529507.PMI1839	0.053	0	0	0	0.065	0	0.8	0.73	0.945
hemC	hemX	7104032	7104030	529507.PMI3332	529507.PMI3330	0.847	0	0	0	0.072	0	0.584	0	0.936
PMI1477	hemL	7102223	7101001	529507.PMI1477	529507.PMI0205	0.478	0.063	0.532	0	0.063	0.422	0	0.471	0.919
PMI2247	hemL	7102980	7101001	529507.PMI2247	529507.PMI0205	0.478	0.042	0.489	0	0.063	0.422	0	0.471	0.909
hemD	hemL	7104031	7101001	529507.PMI3331	529507.PMI0205	0.381	0	0	0	0.084	0.419	0	0.734	0.9
hemH	hemF	7102917	7102581	529507.PMI2183	529507.PMI1839	0.129	0	0.624	0	0.22	0	0	0.583	0.879
hemN	yggW	7103601	7101120	529507.PMI2885	529507.PMI0332	0	0	0.685	0.657	0.062	0	0.8	0.384	0.867
hemF	yggW	7102581	7101120	529507.PMI1839	529507.PMI0332	0.047	0	0	0	0.067	0	0.8	0.28	0.854
hemH	hemL	7102917	7101001	529507.PMI2183	529507.PMI0205	0.381	0	0	0	0.064	0	0	0.738	0.835
hemC	hemH	7104032	7102917	529507.PMI3332	529507.PMI2183	0.381	0	0	0	0.133	0	0	0.69	0.819
hemD	hemH	7104031	7102917	529507.PMI3331	529507.PMI2183	0.376	0	0	0	0.103	0	0	0.686	0.809
hemC	hemF	7104032	7102581	529507.PMI3332	529507.PMI1839	0.381	0	0	0	0.366	0	0	0.381	0.735
hemN	hemL	7103601	7101001	529507.PMI2885	529507.PMI0205	0.381	0	0.163	0	0.06	0	0	0.456	0.699
hemF	hemL	7102581	7101001	529507.PMI1839	529507.PMI0205	0.127	0	0	0	0.467	0	0	0.38	0.686
hemC	hemN	7104032	7103601	529507.PMI3332	529507.PMI2885	0.381	0	0.215	0	0.084	0	0	0.282	0.637
hemF	PMI1477	7102581	7102223	529507.PMI1839	529507.PMI1477	0	0	0.164	0	0.062	0	0	0.558	0.623
PMI2247	hemF	7102980	7102581	529507.PMI2247	529507.PMI1839	0	0	0.153	0	0.062	0	0	0.558	0.618
hemN	hemH	7103601	7102917	529507.PMI2885	529507.PMI2183	0.099	0	0.202	0	0.063	0	0	0.49	0.61
hemH	PMI1477	7102917	7102223	529507.PMI2183	529507.PMI1477	0.062	0	0	0	0	0	0	0.571	0.58
PMI2247	hemH	7102980	7102917	529507.PMI2247	529507.PMI2183	0.062	0	0	0	0	0	0	0.571	0.58
hemN	PMI1477	7103601	7102223	529507.PMI2885	529507.PMI1477	0.062	0	0	0	0	0	0	0.533	0.543
hemN	PMI2247	7103601	7102980	529507.PMI2885	529507.PMI2247	0.062	0	0	0	0	0	0	0.533	0.543
PMI1477	yggW	7102223	7101120	529507.PMI1477	529507.PMI0332	0.062	0	0	0	0	0	0	0.407	0.419
PMI2247	yggW	7102980	7101120	529507.PMI2247	529507.PMI0332	0.062	0	0	0	0	0	0	0.407	0.419
fliG	fliF	7102377	7102376	529507.PMI1631	529507.PMI1630	0.89	0	0.777	0	0.697	0.942	0	0.916	0.999
fliM	fliF	7102383	7102376	529507.PMI1637	529507.PMI1630	0.626	0	0.77	0	0.633	0.931	0	0.834	0.999
fliS	fliD	7102368	7102367	529507.PMI1622	529507.PMI1621	0.833	0	0.758	0	0.838	0.285	0	0.849	0.999
fliM	fliG	7102383	7102377	529507.PMI1637	529507.PMI1631	0.626	0	0.778	0	0.618	0.938	0.8	0.865	0.999
fliS	fliC1	7102368	7102366	529507.PMI1622	529507.PMI1620	0.494	0	0.765	0	0.519	0.869	0	0.779	0.998
fliS	fliC2	7102368	7102365	529507.PMI1622	529507.PMI1619	0.463	0	0.763	0	0.519	0.869	0	0.787	0.997
flgE	flgK	7102397	7102391	529507.PMI1651	529507.PMI1645	0.581	0	0.768	0	0.611	0	0	0.834	0.992
fliD	fliC1	7102367	7102366	529507.PMI1621	529507.PMI1620	0.501	0	0.763	0	0.6	0.13	0	0.834	0.991
fliD	fliC2	7102367	7102365	529507.PMI1621	529507.PMI1619	0.465	0	0.766	0	0.6	0.13	0	0.841	0.991
flgE	fliG	7102397	7102377	529507.PMI1651	529507.PMI1631	0.381	0	0.773	0	0.562	0	0	0.816	0.987
flgK	fliD	7102391	7102367	529507.PMI1645	529507.PMI1621	0.381	0	0.735	0	0.57	0	0	0.84	0.987
flgE	fliM	7102397	7102383	529507.PMI1651	529507.PMI1637	0.381	0	0.698	0	0.591	0	0	0.834	0.985
flgM	fliA	7102402	7102364	529507.PMI1656	529507.PMI1618	0	0	0.258	0	0.481	0.918	0	0.563	0.984
flgE	fliD	7102397	7102367	529507.PMI1651	529507.PMI1621	0.381	0	0.75	0	0.484	0	0	0.821	0.983
flgE	fliF	7102397	7102376	529507.PMI1651	529507.PMI1630	0.381	0	0.765	0	0.481	0	0	0.799	0.982
flgK	fliS	7102391	7102368	529507.PMI1645	529507.PMI1622	0.381	0	0.662	0	0.581	0.176	0	0.789	0.982
fliF	fliD	7102376	7102367	529507.PMI1630	529507.PMI1621	0.381	0	0.741	0	0.466	0	0	0.823	0.982
flgE	fliC1	7102397	7102366	529507.PMI1651	529507.PMI1620	0.374	0	0.767	0	0.48	0	0	0.797	0.982
fliF	fliS	7102376	7102368	529507.PMI1630	529507.PMI1622	0.381	0	0.736	0	0.565	0	0	0.778	0.982
flgE	fliC2	7102397	7102365	529507.PMI1651	529507.PMI1619	0.374	0	0.765	0	0.48	0	0	0.788	0.981
flgK	fliC1	7102391	7102366	529507.PMI1645	529507.PMI1620	0.381	0	0.724	0	0.518	0	0	0.789	0.98
fliD	fliA	7102367	7102364	529507.PMI1621	529507.PMI1618	0.303	0	0.681	0	0.564	0	0	0.822	0.98
flgK	fliC2	7102391	7102365	529507.PMI1645	529507.PMI1619	0.381	0	0.733	0	0.518	0	0	0.789	0.98
fliG	fliS	7102377	7102368	529507.PMI1631	529507.PMI1622	0.381	0	0.763	0	0.511	0	0	0.755	0.98
fliM	fliS	7102383	7102368	529507.PMI1637	529507.PMI1622	0.381	0	0.754	0	0.497	0	0	0.739	0.977
flgK	fliA	7102391	7102364	529507.PMI1645	529507.PMI1618	0.381	0	0.759	0	0.533	0	0	0.69	0.975
fliM	fliA	7102383	7102364	529507.PMI1637	529507.PMI1618	0.381	0	0.731	0	0.51	0	0	0.74	0.975
flgE	fliA	7102397	7102364	529507.PMI1651	529507.PMI1618	0.381	0	0.713	0	0.568	0	0	0.718	0.975
flgK	fliM	7102391	7102383	529507.PMI1645	529507.PMI1637	0.381	0	0.773	0	0.342	0	0	0.757	0.974
fliC1	fliA	7102366	7102364	529507.PMI1620	529507.PMI1618	0.176	0	0.636	0	0.482	0	0	0.855	0.974
fliC2	fliA	7102365	7102364	529507.PMI1619	529507.PMI1618	0.176	0	0.619	0	0.482	0	0	0.863	0.974
fliM	fliD	7102383	7102367	529507.PMI1637	529507.PMI1621	0.381	0	0.696	0	0.533	0	0	0.739	0.974
flgK	fliG	7102391	7102377	529507.PMI1645	529507.PMI1631	0.298	0	0.775	0	0.398	0	0	0.752	0.973
fliG	fliA	7102377	7102364	529507.PMI1631	529507.PMI1618	0.381	0	0.716	0	0.482	0	0	0.736	0.972
fliG	fliD	7102377	7102367	529507.PMI1631	529507.PMI1621	0.381	0	0.702	0	0.48	0	0	0.721	0.969
flgK	fliF	7102391	7102376	529507.PMI1645	529507.PMI1630	0.341	0	0.777	0	0.252	0	0	0.752	0.969
fliF	fliA	7102376	7102364	529507.PMI1630	529507.PMI1618	0.381	0	0.721	0	0.386	0	0	0.738	0.968
flgM	fliS	7102402	7102368	529507.PMI1656	529507.PMI1622	0.059	0	0.2	0	0.482	0.913	0	0.19	0.967
fliS	fliA	7102368	7102364	529507.PMI1622	529507.PMI1618	0.128	0	0.732	0	0.56	0	0	0.708	0.966
fliG	fliC2	7102377	7102365	529507.PMI1631	529507.PMI1619	0.303	0	0.772	0	0.19	0	0	0.747	0.963
fliG	fliC1	7102377	7102366	529507.PMI1631	529507.PMI1620	0.303	0	0.772	0	0.19	0	0	0.747	0.963
fliF	fliC2	7102376	7102365	529507.PMI1630	529507.PMI1619	0.322	0	0.634	0	0.123	0	0	0.787	0.947
fliF	fliC1	7102376	7102366	529507.PMI1630	529507.PMI1620	0.322	0	0.63	0	0.123	0	0	0.786	0.946
flgE	fliS	7102397	7102368	529507.PMI1651	529507.PMI1622	0.106	0	0.576	0	0.376	0	0	0.77	0.938
fliM	fliC1	7102383	7102366	529507.PMI1637	529507.PMI1620	0.11	0	0.662	0	0.133	0	0	0.782	0.935
fliM	fliC2	7102383	7102365	529507.PMI1637	529507.PMI1619	0.11	0	0.659	0	0.133	0	0	0.759	0.928
fliC1	fliC2	7102366	7102365	529507.PMI1620	529507.PMI1619	0.446	0	0.778	0.983	0	0	0.8	0.058	0.886
flgM	flgK	7102402	7102391	529507.PMI1656	529507.PMI1645	0.381	0	0.494	0	0.515	0	0	0.15	0.853
flgM	fliD	7102402	7102367	529507.PMI1656	529507.PMI1621	0.058	0	0.645	0	0.51	0	0	0.176	0.846
flgM	fliM	7102402	7102383	529507.PMI1656	529507.PMI1637	0.046	0	0.419	0	0.278	0	0	0.387	0.722
flgM	fliC2	7102402	7102365	529507.PMI1656	529507.PMI1619	0.094	0	0	0	0.388	0	0	0.42	0.65
flgM	fliC1	7102402	7102366	529507.PMI1656	529507.PMI1620	0.094	0	0	0	0.388	0	0	0.418	0.649
flgM	flgE	7102402	7102397	529507.PMI1656	529507.PMI1651	0.061	0	0.167	0	0.419	0.169	0	0.145	0.618
flgM	fliG	7102402	7102377	529507.PMI1656	529507.PMI1631	0	0	0.178	0	0.342	0	0	0.096	0.468
flgM	fliF	7102402	7102376	529507.PMI1656	529507.PMI1630	0	0	0.209	0	0.201	0	0	0.144	0.412
miaA	mutL	7104063	7104062	529507.PMI3364	529507.PMI3363	0.89	0	0.367	0	0	0	0	0.584	0.968
hfq	rho	7104064	7104014	529507.PMI3365	529507.PMI3314	0.059	0	0	0	0	0.834	0	0.73	0.954
hfq	miaA	7104064	7104063	529507.PMI3365	529507.PMI3364	0.702	0	0.483	0	0.215	0	0	0.653	0.952
hflX	miaA	7104065	7104063	529507.PMI3366	529507.PMI3364	0.606	0	0.521	0	0.181	0	0	0.7	0.947
hfq	mutL	7104064	7104062	529507.PMI3365	529507.PMI3363	0.702	0	0.292	0	0	0	0	0.652	0.92
miaA	amiB	7104063	7104061	529507.PMI3364	529507.PMI3362	0.854	0	0.353	0	0	0	0	0.13	0.911
hfq	pcnB	7104064	7100995	529507.PMI3365	529507.PMI0198	0	0	0	0	0	0.779	0	0.595	0.906
mutL	amiB	7104062	7104061	529507.PMI3363	529507.PMI3362	0.854	0	0	0	0.092	0	0	0.127	0.874
hfq	csrA	7104064	7101164	529507.PMI3365	529507.PMI0377	0	0	0	0	0.07	0.131	0	0.833	0.853
hfq	rpoS	7104064	7102969	529507.PMI3365	529507.PMI2236	0	0	0	0	0.059	0	0	0.849	0.852
hflX	hfq	7104065	7104064	529507.PMI3366	529507.PMI3365	0.717	0	0.26	0	0.084	0	0	0.282	0.844
rpoS	katA	7102969	7102486	529507.PMI2236	529507.PMI1740	0	0	0	0	0.067	0	0	0.828	0.833
rpoS	csrA	7102969	7101164	529507.PMI2236	529507.PMI0377	0	0	0	0	0	0.119	0	0.808	0.824
hfq	katA	7104064	7102486	529507.PMI3365	529507.PMI1740	0	0	0	0	0	0.773	0	0.178	0.805
hfq	amiB	7104064	7104061	529507.PMI3365	529507.PMI3362	0.689	0	0.294	0	0	0	0	0.129	0.793
purA	hfq	7104069	7104064	529507.PMI3370	529507.PMI3365	0.494	0	0	0	0	0	0	0.583	0.78
hflX	mutL	7104065	7104062	529507.PMI3366	529507.PMI3363	0.606	0	0.346	0	0.084	0	0	0.14	0.77
purA	mutL	7104069	7104062	529507.PMI3370	529507.PMI3363	0.457	0	0	0	0	0	0	0.571	0.757
rho	rpoS	7104014	7102969	529507.PMI3314	529507.PMI2236	0	0	0	0	0.059	0.174	0	0.639	0.694
purA	miaA	7104069	7104063	529507.PMI3370	529507.PMI3364	0.472	0	0	0	0.085	0	0.392	0.066	0.689
hflX	amiB	7104065	7104061	529507.PMI3366	529507.PMI3362	0.599	0	0.186	0	0	0	0	0	0.66
miaA	rpoS	7104063	7102969	529507.PMI3364	529507.PMI2236	0.058	0	0	0	0.061	0	0	0.563	0.579
rpoS	pcnB	7102969	7100995	529507.PMI2236	529507.PMI0198	0.056	0	0.183	0	0.049	0	0	0.466	0.556
purA	hflX	7104069	7104065	529507.PMI3370	529507.PMI3366	0.526	0	0	0	0	0	0	0	0.526
csrA	pcnB	7101164	7100995	529507.PMI0377	529507.PMI0198	0	0	0	0	0	0	0	0.489	0.489
rho	csrA	7104014	7101164	529507.PMI3314	529507.PMI0377	0	0	0	0	0	0.122	0	0.421	0.469
purA	amiB	7104069	7104061	529507.PMI3370	529507.PMI3362	0.407	0	0	0	0	0	0	0	0.408
gshA	gshB	7101165	7101128	529507.PMI0378	529507.PMI0340	0.062	0	0.401	0	0	0	0.965	0.777	0.995
pepN	gshB	7101548	7101128	529507.PMI0769	529507.PMI0340	0	0	0	0	0.061	0	0.956	0.399	0.973
gshB	ggt	7101128	7100872	529507.PMI0340	529507.PMI0072	0	0	0	0	0	0	0.965	0.216	0.972
pepA	ggt	7104163	7100872	529507.PMI3464	529507.PMI0072	0	0	0	0	0.054	0	0.947	0.376	0.966
pepN	ggt	7101548	7100872	529507.PMI0769	529507.PMI0072	0	0	0	0	0.044	0	0.956	0.19	0.963
gshA	ggt	7101165	7100872	529507.PMI0378	529507.PMI0072	0.067	0	0.166	0	0	0	0.947	0	0.955
pepN	gshA	7101548	7101165	529507.PMI0769	529507.PMI0378	0	0	0	0	0	0	0.952	0	0.952
pepB	ggt	7102595	7100872	529507.PMI1853	529507.PMI0072	0	0	0	0	0.054	0	0.947	0.109	0.951
pepA	gshB	7104163	7101128	529507.PMI3464	529507.PMI0340	0.043	0	0.222	0	0.064	0	0.9	0.066	0.923
pepA	pepN	7104163	7101548	529507.PMI3464	529507.PMI0769	0	0	0	0	0.103	0	0.8	0.567	0.915
pepB	gshB	7102595	7101128	529507.PMI1853	529507.PMI0340	0.043	0	0	0	0.063	0	0.9	0.066	0.905
pepD	gshB	7101152	7101128	529507.PMI0364	529507.PMI0340	0	0	0	0	0.062	0	0.9	0	0.902
pepA	gshA	7104163	7101165	529507.PMI3464	529507.PMI0378	0	0	0	0	0.06	0	0.9	0	0.901
pepB	gshA	7102595	7101165	529507.PMI1853	529507.PMI0378	0	0	0	0	0.06	0	0.9	0	0.901
pepD	ggt	7101152	7100872	529507.PMI0364	529507.PMI0072	0	0	0	0	0	0	0.9	0	0.9
ilvE	gshA	7104001	7101165	529507.PMI3301	529507.PMI0378	0	0	0	0	0	0	0.9	0	0.9
gshA	pepD	7101165	7101152	529507.PMI0378	529507.PMI0364	0	0	0	0	0	0	0.9	0	0.9
pepB	pepN	7102595	7101548	529507.PMI1853	529507.PMI0769	0	0	0	0	0.103	0	0.8	0.395	0.881
pepA	pepB	7104163	7102595	529507.PMI3464	529507.PMI1853	0	0	0.778	0.722	0	0.125	0.8	0.566	0.878
glnA	ggt	7103598	7100872	529507.PMI2882	529507.PMI0072	0.042	0	0	0	0.062	0	0.8	0.315	0.86
pepB	pepD	7102595	7101152	529507.PMI1853	529507.PMI0364	0	0	0	0	0.063	0.124	0.8	0.163	0.844
pepA	pepD	7104163	7101152	529507.PMI3464	529507.PMI0364	0	0	0	0	0.07	0.125	0.8	0.131	0.839
cysM	cysK	7102573	7102569	529507.PMI1831	529507.PMI1827	0	0	0.778	0.824	0	0	0.8	0.396	0.838
cysM	gshA	7102573	7101165	529507.PMI1831	529507.PMI0378	0	0	0	0	0	0	0.8	0.225	0.838
cysK	gshA	7102569	7101165	529507.PMI1827	529507.PMI0378	0	0	0	0	0	0	0.8	0.217	0.836
pepN	pepD	7101548	7101152	529507.PMI0769	529507.PMI0364	0	0	0	0	0.063	0	0.8	0.12	0.82
cysM	pepD	7102573	7101152	529507.PMI1831	529507.PMI0364	0.054	0	0	0	0.059	0	0.8	0.089	0.816
cysK	pepD	7102569	7101152	529507.PMI1827	529507.PMI0364	0.054	0	0	0	0.059	0	0.8	0.089	0.816
glnA	gshA	7103598	7101165	529507.PMI2882	529507.PMI0378	0	0	0	0	0	0	0.8	0.11	0.814
pepA	cysM	7104163	7102573	529507.PMI3464	529507.PMI1831	0.047	0	0	0	0.063	0	0.8	0	0.805
pepB	cysM	7102595	7102573	529507.PMI1853	529507.PMI1831	0.047	0	0	0	0.063	0	0.8	0	0.805
pepB	cysK	7102595	7102569	529507.PMI1853	529507.PMI1827	0.047	0	0	0	0.063	0	0.8	0	0.805
pepA	cysK	7104163	7102569	529507.PMI3464	529507.PMI1827	0.047	0	0	0	0.063	0	0.8	0	0.805
cysM	pepN	7102573	7101548	529507.PMI1831	529507.PMI0769	0	0	0	0	0.061	0	0.8	0.042	0.804
cysK	pepN	7102569	7101548	529507.PMI1827	529507.PMI0769	0	0	0	0	0.061	0	0.8	0.042	0.804

## Sheet: QSPO
#node1	node2	node1_string_internal_id	node2_string_internal_id	node1_external_id	node2_external_id	neighborhood_on_chromosome	gene_fusion	phylogenetic_cooccurrence	homology	coexpression	experimentally_determined_interaction	database_annotated	automated_textmining	combined_score
PMI1344	trpE	7102090	7102089	529507.PMI1344	529507.PMI1343	0.906	0.743	0.778	0	0.546	0.834	0.931	0.672	0.999
kdpD	kdpE	7101974	7101973	529507.PMI1227	529507.PMI1226	0.907	0.091	0.768	0	0.442	0.779	0.905	0.865	0.999
ribA	ribD	7102063	7100881	529507.PMI1317	529507.PMI0081	0.478	0	0.775	0	0.879	0.122	0.974	0.707	0.999
pabA	pabB	7103538	7102351	529507.PMI2822	529507.PMI1605	0.364	0.898	0.778	0	0.546	0.834	0.924	0.751	0.999
pabB	PMI1344	7102351	7102090	529507.PMI1605	529507.PMI1344	0.364	0.801	0.778	0	0.546	0.834	0.913	0.381	0.999
PMI1345	PMI1344	7102091	7102090	529507.PMI1345	529507.PMI1344	0.902	0.894	0.77	0	0.13	0.376	0.965	0.564	0.999
trpC	PMI1345	7102092	7102091	529507.PMI1346	529507.PMI1345	0.916	0.294	0.778	0	0.838	0	0.974	0.823	0.999
pabA	trpE	7103538	7102089	529507.PMI2822	529507.PMI1343	0.381	0.813	0.775	0	0.546	0.834	0.931	0.721	0.999
flhD	flhC	7102418	7102417	529507.PMI1672	529507.PMI1671	0.89	0	0.778	0	0.58	0.945	0	0.776	0.999
trpC	trpE	7102092	7102089	529507.PMI1346	529507.PMI1343	0.92	0	0.778	0	0.65	0.461	0.752	0.849	0.999
PMI1345	trpE	7102091	7102089	529507.PMI1345	529507.PMI1343	0.902	0	0.777	0	0.479	0.834	0.965	0.853	0.999
trpC	PMI1344	7102092	7102090	529507.PMI1346	529507.PMI1344	0.92	0.308	0.734	0	0.838	0	0.752	0.495	0.999
pabA	PMI1345	7103538	7102091	529507.PMI2822	529507.PMI1345	0.381	0.899	0.722	0	0.13	0.376	0.673	0.701	0.998
pabA	trpC	7103538	7102092	529507.PMI2822	529507.PMI1346	0.462	0.467	0.431	0	0.838	0	0.752	0.731	0.997
pabB	PMI1345	7102351	7102091	529507.PMI1605	529507.PMI1345	0.337	0	0.753	0	0.479	0.834	0.584	0.572	0.996
pabB	trpC	7102351	7102092	529507.PMI1605	529507.PMI1346	0.462	0	0.572	0	0.65	0.461	0.752	0.57	0.994
PMI2708	PMI2707	7103424	7103423	529507.PMI2708	529507.PMI2707	0.888	0	0.778	0	0.084	0	0	0.46	0.986
gadB	gadC	7102153	7102152	529507.PMI1407	529507.PMI1406	0.707	0	0.776	0	0.289	0.12	0	0.44	0.972
pabB	trpE	7102351	7102089	529507.PMI1605	529507.PMI1343	0	0	0.778	0.679	0.06	0	0.912	0.7	0.949
pabA	PMI1344	7103538	7102090	529507.PMI2822	529507.PMI1344	0	0	0.778	0.864	0	0	0.931	0.116	0.939
oxaA	yajC	7103833	7100877	529507.PMI3128	529507.PMI0077	0.064	0	0.362	0	0.064	0.119	0	0.782	0.873
PMI2708	yajC	7103424	7100877	529507.PMI2708	529507.PMI0077	0	0	0.155	0	0	0.74	0	0	0.77
rssA	kdpE	7102443	7101973	529507.PMI1697	529507.PMI1226	0.062	0.037	0.63	0	0	0	0	0.075	0.65
hfq	luxS	7104064	7101166	529507.PMI3365	529507.PMI0379	0	0	0	0	0.062	0	0	0.627	0.635
oxaA	lepB	7103833	7102631	529507.PMI3128	529507.PMI1889	0.063	0	0.477	0	0.063	0.12	0	0.129	0.583
lepB	yajC	7102631	7100877	529507.PMI1889	529507.PMI0077	0.114	0	0.458	0	0.062	0	0	0.13	0.555
ribD	yajC	7100881	7100877	529507.PMI0081	529507.PMI0077	0.549	0	0	0	0	0	0	0	0.549
gadC	PMI1345	7102152	7102091	529507.PMI1406	529507.PMI1345	0	0	0	0	0	0.508	0	0	0.508
hfq	crp	7104064	7103536	529507.PMI3365	529507.PMI2820	0	0	0	0	0.062	0	0	0.459	0.471
mppA	kdpE	7102113	7101973	529507.PMI1367	529507.PMI1226	0	0	0	0	0	0.398	0	0.045	0.4

## Sheet: QSPH
#node1	node2	node1_string_internal_id	node2_string_internal_id	node1_external_id	node2_external_id	neighborhood_on_chromosome	gene_fusion	phylogenetic_cooccurrence	homology	coexpression	experimentally_determined_interaction	database_annotated	automated_textmining	combined_score
flhD	flhC	7102418	7102417	529507.PMI1672	529507.PMI1671	0.89	0	0.778	0	0.58	0.945	0	0.776	0.999
pabA	trpE	7103538	7102089	529507.PMI2822	529507.PMI1343	0.381	0.813	0.775	0	0.546	0.834	0.931	0.721	0.999
oppB	oppD	7102220	7102218	529507.PMI1474	529507.PMI1472	0.868	0.018	0.776	0	0.356	0.209	0.913	0.492	0.999
pabB	PMI1344	7102351	7102090	529507.PMI1605	529507.PMI1344	0.364	0.801	0.778	0	0.546	0.834	0.913	0.381	0.999
kdpD	kdpE	7101974	7101973	529507.PMI1227	529507.PMI1226	0.907	0.091	0.768	0	0.442	0.779	0.905	0.865	0.999
PMI1345	PMI1344	7102091	7102090	529507.PMI1345	529507.PMI1344	0.902	0.894	0.77	0	0.13	0.376	0.965	0.564	0.999
oppC	oppD	7102219	7102218	529507.PMI1473	529507.PMI1472	0.906	0.137	0.777	0	0.287	0.209	0.931	0.479	0.999
pabA	pabB	7103538	7102351	529507.PMI2822	529507.PMI1605	0.364	0.898	0.778	0	0.546	0.834	0.924	0.751	0.999
ribA	ribD	7102063	7100881	529507.PMI1317	529507.PMI0081	0.478	0	0.775	0	0.879	0.122	0.974	0.707	0.999
PMI1345	trpE	7102091	7102089	529507.PMI1345	529507.PMI1343	0.902	0	0.777	0	0.479	0.834	0.965	0.853	0.999
PMI1344	trpE	7102090	7102089	529507.PMI1344	529507.PMI1343	0.906	0.743	0.778	0	0.546	0.834	0.931	0.672	0.999
oppB	oppC	7102220	7102219	529507.PMI1474	529507.PMI1473	0.871	0.074	0.778	0	0.622	0.215	0.914	0.725	0.999
oppC	oppF	7102219	7102217	529507.PMI1473	529507.PMI1471	0.906	0.084	0.777	0	0.284	0.129	0.931	0.476	0.999
luxS	mtnN	7101166	7101010	529507.PMI0379	529507.PMI0214	0.381	0	0.756	0	0	0	0.965	0.76	0.998
oppB	oppF	7102220	7102217	529507.PMI1474	529507.PMI1471	0.868	0.011	0.775	0	0.284	0.19	0.913	0.418	0.998
pabA	PMI1345	7103538	7102091	529507.PMI2822	529507.PMI1345	0.381	0.899	0.722	0	0.13	0.376	0.673	0.701	0.998
oppA	oppC	7102221	7102219	529507.PMI1475	529507.PMI1473	0.732	0.011	0.778	0	0.226	0.173	0.914	0.252	0.997
oppA	oppB	7102221	7102220	529507.PMI1475	529507.PMI1474	0.758	0.077	0.778	0	0.282	0.172	0.914	0.247	0.997
oppA	oppD	7102221	7102218	529507.PMI1475	529507.PMI1472	0.731	0.003	0.721	0	0.375	0.126	0.922	0.242	0.997
oppA	oppF	7102221	7102217	529507.PMI1475	529507.PMI1471	0.729	0.003	0.745	0	0.102	0.127	0.925	0.271	0.996
pabB	PMI1345	7102351	7102091	529507.PMI1605	529507.PMI1345	0.337	0	0.753	0	0.479	0.834	0.584	0.572	0.996
oppD	oppF	7102218	7102217	529507.PMI1472	529507.PMI1471	0.907	0	0.778	0.847	0.272	0.13	0.931	0.494	0.996
oppA2	oppB	7102222	7102220	529507.PMI1476	529507.PMI1474	0.584	0.101	0.778	0	0.282	0.172	0.913	0.175	0.995
yntB	yntC	7103249	7103248	529507.PMI2515	529507.PMI2514	0.908	0.213	0.778	0	0.155	0.171	0.602	0.131	0.995
oppA2	oppD	7102222	7102218	529507.PMI1476	529507.PMI1472	0.571	0.002	0.726	0	0.375	0.126	0.913	0.16	0.994
oppA2	oppC	7102222	7102219	529507.PMI1476	529507.PMI1473	0.572	0.009	0.778	0	0.226	0.173	0.912	0.17	0.994
oppB	mppA	7102220	7102113	529507.PMI1474	529507.PMI1367	0.38	0.123	0.778	0	0.282	0.172	0.914	0.129	0.993
secY	secA	7103975	7102795	529507.PMI3275	529507.PMI2061	0.063	0	0.484	0	0.084	0.937	0	0.788	0.993
yntA	yntC	7103250	7103248	529507.PMI2516	529507.PMI2514	0.908	0	0.778	0	0.084	0.121	0.588	0.109	0.992
yntC	yntD	7103248	7103247	529507.PMI2514	529507.PMI2513	0.907	0.021	0.778	0	0.248	0	0.547	0.103	0.992
oppA2	oppF	7102222	7102217	529507.PMI1476	529507.PMI1471	0.569	0.001	0.746	0	0.102	0.127	0.913	0.229	0.992
secG	secE	7104114	7103507	529507.PMI3415	529507.PMI2791	0	0	0.469	0	0.12	0.945	0	0.727	0.992
yntB	yntD	7103249	7103247	529507.PMI2515	529507.PMI2513	0.907	0	0.778	0	0.127	0	0.547	0.109	0.991
yntA	yntD	7103250	7103247	529507.PMI2516	529507.PMI2513	0.905	0	0.778	0	0.131	0	0.547	0.089	0.991
oppD	mppA	7102218	7102113	529507.PMI1472	529507.PMI1367	0.379	0	0.723	0	0.375	0.126	0.922	0.111	0.991
yntA	yntB	7103250	7103249	529507.PMI2516	529507.PMI2515	0.908	0.001	0.778	0	0.082	0	0.588	0.109	0.991
oppC	mppA	7102219	7102113	529507.PMI1473	529507.PMI1367	0.38	0.005	0.778	0	0.226	0.173	0.914	0.121	0.991
oppF	mppA	7102217	7102113	529507.PMI1471	529507.PMI1367	0.376	0	0.748	0	0.102	0.127	0.925	0.138	0.99
secY	secE	7103975	7103507	529507.PMI3275	529507.PMI2791	0.062	0	0	0	0.085	0.945	0	0.798	0.989
secB	secA	7103884	7102795	529507.PMI3183	529507.PMI2061	0	0	0	0	0	0.937	0	0.834	0.989
ftsY	ffh	7104295	7101169	529507.PMI3605	529507.PMI0382	0.381	0	0.778	0.656	0.517	0.89	0.462	0.527	0.987
yntC	yntE	7103248	7103246	529507.PMI2514	529507.PMI2512	0.771	0.004	0.778	0	0.134	0	0.582	0.112	0.98
secG	secY	7104114	7103975	529507.PMI3415	529507.PMI3275	0	0	0	0	0.063	0.945	0	0.645	0.98
yntB	yntE	7103249	7103246	529507.PMI2515	529507.PMI2512	0.771	0	0.778	0	0.07	0	0.582	0.075	0.978
yntA	yntE	7103250	7103246	529507.PMI2516	529507.PMI2512	0.77	0	0.778	0	0.06	0	0.581	0.075	0.978
gadB	gadC	7102153	7102152	529507.PMI1407	529507.PMI1406	0.707	0	0.776	0	0.289	0.12	0	0.44	0.972
secY	oxaA	7103975	7103833	529507.PMI3275	529507.PMI3128	0	0	0.26	0	0.15	0.834	0	0.746	0.969
secE	secA	7103507	7102795	529507.PMI2791	529507.PMI2061	0	0	0	0	0	0.847	0	0.791	0.966
yntD	yntE	7103247	7103246	529507.PMI2513	529507.PMI2512	0.67	0.15	0.778	0	0.29	0	0	0	0.95
pabB	trpE	7102351	7102089	529507.PMI1605	529507.PMI1343	0	0	0.778	0.679	0.06	0	0.912	0.7	0.949
oppA2	oppA	7102222	7102221	529507.PMI1476	529507.PMI1475	0.462	0	0.778	0.962	0	0	0.905	0.189	0.948
secG	secA	7104114	7102795	529507.PMI3415	529507.PMI2061	0	0	0	0	0	0.834	0	0.694	0.947
pabA	PMI1344	7103538	7102090	529507.PMI2822	529507.PMI1344	0	0	0.778	0.864	0	0	0.931	0.116	0.939
yntB	oppC	7103249	7102219	529507.PMI2515	529507.PMI1473	0.379	0.028	0.591	0	0.127	0.174	0.581	0.21	0.925
yntC	oppB	7103248	7102220	529507.PMI2514	529507.PMI1474	0.379	0.03	0.627	0	0.117	0.171	0.581	0.131	0.923
yntC	oppD	7103248	7102218	529507.PMI2514	529507.PMI1472	0.381	0.029	0.536	0	0.287	0.172	0.539	0.13	0.916
secG	oxaA	7104114	7103833	529507.PMI3415	529507.PMI3128	0	0	0.162	0	0.073	0.837	0	0.393	0.912
oppA2	mppA	7102222	7102113	529507.PMI1476	529507.PMI1367	0	0	0.778	0.898	0	0	0.905	0	0.912
yntB	oppD	7103249	7102218	529507.PMI2515	529507.PMI1472	0.378	0.002	0.449	0	0.201	0.178	0.581	0.209	0.908
oxaA	secE	7103833	7103507	529507.PMI3128	529507.PMI2791	0	0	0.179	0	0.084	0.773	0	0.458	0.895
yntB	oppF	7103249	7102217	529507.PMI2515	529507.PMI1471	0.375	0.002	0.323	0	0.123	0.175	0.581	0.21	0.875
oxaA	yajC	7103833	7100877	529507.PMI3128	529507.PMI0077	0.064	0	0.362	0	0.064	0.119	0	0.782	0.873
yntC	oppF	7103248	7102217	529507.PMI2514	529507.PMI1471	0.375	0.018	0.427	0	0.145	0.126	0.539	0.109	0.864
yntB	mppA	7103249	7102113	529507.PMI2515	529507.PMI1367	0.38	0.007	0.156	0	0.282	0.172	0.581	0.129	0.86
secY	secB	7103975	7103884	529507.PMI3275	529507.PMI3183	0	0	0	0	0.062	0.12	0	0.834	0.851
secY	ffh	7103975	7101169	529507.PMI3275	529507.PMI0382	0.045	0	0	0	0.128	0.155	0.25	0.762	0.851
yntB	oppA2	7103249	7102222	529507.PMI2515	529507.PMI1476	0.38	0.004	0	0	0.282	0.172	0.581	0.129	0.84
yntB	oppA	7103249	7102221	529507.PMI2515	529507.PMI1475	0.38	0.003	0	0	0.282	0.172	0.581	0.129	0.84
oxaA	ffh	7103833	7101169	529507.PMI3128	529507.PMI0382	0	0	0	0	0.125	0.215	0	0.783	0.838
kdpD	ffh	7101974	7101169	529507.PMI1227	529507.PMI0382	0	0	0	0	0	0.834	0	0	0.834
secB	oxaA	7103884	7103833	529507.PMI3183	529507.PMI3128	0	0	0.247	0	0.062	0	0	0.771	0.824
yntC	mppA	7103248	7102113	529507.PMI2514	529507.PMI1367	0.38	0	0.242	0	0.067	0.173	0.539	0.109	0.816
oppA	mppA	7102221	7102113	529507.PMI1475	529507.PMI1367	0	0	0.778	0.916	0	0	0.8	0	0.812
secB	secE	7103884	7103507	529507.PMI3183	529507.PMI2791	0	0	0.223	0	0	0	0	0.768	0.812
PMI1423	aroF	7102169	7101174	529507.PMI1423	529507.PMI0387	0	0	0.778	0.934	0	0	0.8	0	0.81
aroG	aroF	7101373	7101174	529507.PMI0589	529507.PMI0387	0	0	0.778	0.938	0	0	0.8	0	0.809
PMI1423	aroG	7102169	7101373	529507.PMI1423	529507.PMI0589	0	0	0.778	0.954	0	0	0.8	0	0.807
yntC	oppA2	7103248	7102222	529507.PMI2514	529507.PMI1476	0.38	0	0.189	0	0.067	0.173	0.539	0.109	0.803
secA	ffh	7102795	7101169	529507.PMI2061	529507.PMI0382	0	0	0	0	0.138	0.13	0	0.752	0.797
yntC	oppA	7103248	7102221	529507.PMI2514	529507.PMI1475	0.38	0	0.162	0	0.067	0.173	0.539	0.109	0.796
oxaA	secA	7103833	7102795	529507.PMI3128	529507.PMI2061	0	0	0	0	0.103	0	0	0.765	0.78
yntE	oppD	7103246	7102218	529507.PMI2512	529507.PMI1472	0.381	0.144	0.175	0.666	0.06	0.065	0.573	0.076	0.778
secB	ffh	7103884	7101169	529507.PMI3183	529507.PMI0382	0	0	0	0	0	0	0	0.776	0.776
secA	yajC	7102795	7100877	529507.PMI2061	529507.PMI0077	0	0	0.154	0	0.063	0.119	0	0.716	0.775
secY	lepB	7103975	7102631	529507.PMI3275	529507.PMI1889	0.043	0	0.357	0	0.226	0	0.105	0.545	0.77
yntD	oppC	7103247	7102219	529507.PMI2513	529507.PMI1473	0.368	0.033	0.154	0	0.085	0	0.539	0.103	0.76
yntD	oppB	7103247	7102220	529507.PMI2513	529507.PMI1474	0.368	0.004	0.152	0	0.077	0	0.539	0.109	0.759
yntA	oppB	7103250	7102220	529507.PMI2516	529507.PMI1474	0.377	0.005	0	0	0.082	0	0.581	0.109	0.757
yntA	oppC	7103250	7102219	529507.PMI2516	529507.PMI1473	0.377	0	0	0	0.084	0.121	0.539	0.109	0.756
yntA	oppF	7103250	7102217	529507.PMI2516	529507.PMI1471	0.376	0	0	0	0.077	0.103	0.539	0.109	0.749
yntE	oppC	7103246	7102219	529507.PMI2512	529507.PMI1473	0.377	0.013	0	0	0.134	0	0.539	0.098	0.745
yntE	oppB	7103246	7102220	529507.PMI2512	529507.PMI1474	0.377	0.002	0	0	0.07	0	0.579	0.075	0.744
secG	secB	7104114	7103884	529507.PMI3415	529507.PMI3183	0	0	0	0	0	0.183	0	0.697	0.742
ftsY	secY	7104295	7103975	529507.PMI3605	529507.PMI3275	0.068	0	0	0	0.382	0.126	0.25	0.41	0.737
secB	yajC	7103884	7100877	529507.PMI3183	529507.PMI0077	0	0	0.153	0	0.062	0	0	0.694	0.736
secA	lepB	7102795	7102631	529507.PMI2061	529507.PMI1889	0	0	0.303	0	0.058	0.12	0	0.596	0.735
yntA	oppD	7103250	7102218	529507.PMI2516	529507.PMI1472	0.378	0	0	0	0.063	0	0.539	0.109	0.728
yntD	oppD	7103247	7102218	529507.PMI2513	529507.PMI1472	0.381	0	0.255	0.656	0	0	0.539	0	0.725
yntD	oppF	7103247	7102217	529507.PMI2513	529507.PMI1471	0.367	0	0.188	0.656	0	0	0.539	0	0.711
ffh	yajC	7101169	7100877	529507.PMI0382	529507.PMI0077	0	0	0	0	0.063	0	0	0.701	0.708
yntE	oppA	7103246	7102221	529507.PMI2512	529507.PMI1475	0.381	0	0	0	0	0.091	0.505	0.071	0.706
yntE	mppA	7103246	7102113	529507.PMI2512	529507.PMI1367	0.381	0	0	0	0	0.091	0.505	0.071	0.706
yntE	oppA2	7103246	7102222	529507.PMI2512	529507.PMI1476	0.381	0	0	0	0	0.091	0.505	0.071	0.706
yntD	mppA	7103247	7102113	529507.PMI2513	529507.PMI1367	0.381	0	0	0	0	0	0.52	0	0.69
yntD	oppA2	7103247	7102222	529507.PMI2513	529507.PMI1476	0.381	0	0	0	0	0	0.52	0	0.69
yntD	oppA	7103247	7102221	529507.PMI2513	529507.PMI1475	0.381	0	0	0	0	0	0.52	0	0.69
hfq	luxS	7104064	7101166	529507.PMI3365	529507.PMI0379	0	0	0	0	0.062	0	0	0.627	0.635
secY	yajC	7103975	7100877	529507.PMI3275	529507.PMI0077	0	0	0.174	0	0.066	0	0	0.566	0.635
secB	lepB	7103884	7102631	529507.PMI3183	529507.PMI1889	0	0	0.193	0	0	0	0	0.56	0.629
yntC	oppC	7103248	7102219	529507.PMI2514	529507.PMI1473	0.042	0	0.686	0.638	0	0	0.495	0	0.618
secE	ffh	7103507	7101169	529507.PMI2791	529507.PMI0382	0	0	0	0	0.092	0	0	0.562	0.585
oxaA	lepB	7103833	7102631	529507.PMI3128	529507.PMI1889	0.063	0	0.477	0	0.063	0.12	0	0.129	0.583
yntA	oppA	7103250	7102221	529507.PMI2516	529507.PMI1475	0.061	0	0	0	0	0	0.539	0.109	0.58
yntA	mppA	7103250	7102113	529507.PMI2516	529507.PMI1367	0.061	0	0	0	0	0	0.539	0.109	0.58
yntA	oppA2	7103250	7102222	529507.PMI2516	529507.PMI1476	0.061	0	0	0	0	0	0.539	0.109	0.58
yntE	oppF	7103246	7102217	529507.PMI2512	529507.PMI1471	0.042	0.027	0.169	0.692	0	0	0.537	0.071	0.56
lepB	yajC	7102631	7100877	529507.PMI1889	529507.PMI0077	0.114	0	0.458	0	0.062	0	0	0.13	0.555
ribD	yajC	7100881	7100877	529507.PMI0081	529507.PMI0077	0.549	0	0	0	0	0	0	0	0.549
gadC	PMI1345	7102152	7102091	529507.PMI1406	529507.PMI1345	0	0	0	0	0	0.508	0	0	0.508
ftsY	ribD	7104295	7100881	529507.PMI3605	529507.PMI0081	0.478	0	0	0	0.088	0	0	0	0.503
lepB	ffh	7102631	7101169	529507.PMI1889	529507.PMI0382	0.381	0	0	0	0.063	0	0	0.178	0.481
hfq	crp	7104064	7103536	529507.PMI3365	529507.PMI2820	0	0	0	0	0.062	0	0	0.459	0.471
ftsY	oxaA	7104295	7103833	529507.PMI3605	529507.PMI3128	0	0	0	0	0.091	0.283	0	0.245	0.465
ftsY	secA	7104295	7102795	529507.PMI3605	529507.PMI2061	0	0	0	0	0.226	0.124	0	0.24	0.44
ftsY	yajC	7104295	7100877	529507.PMI3605	529507.PMI0077	0.064	0	0	0	0	0	0	0.413	0.427
ftsY	secB	7104295	7103884	529507.PMI3605	529507.PMI3183	0	0	0	0	0	0	0	0.413	0.413
oppA	kdpE	7102221	7101973	529507.PMI1475	529507.PMI1226	0	0	0	0	0	0.398	0	0.045	0.4
mppA	kdpE	7102113	7101973	529507.PMI1367	529507.PMI1226	0	0	0	0	0	0.398	0	0.045	0.4
oppA2	kdpE	7102222	7101973	529507.PMI1476	529507.PMI1226	0	0	0	0	0	0.398	0	0.045	0.4

## Sheet: QSPV
#node1	node2	node1_string_internal_id	node2_string_internal_id	node1_external_id	node2_external_id	neighborhood_on_chromosome	gene_fusion	phylogenetic_cooccurrence	homology	coexpression	experimentally_determined_interaction	database_annotated	automated_textmining	combined_score
fliM	fliG	7102383	7102377	529507.PMI1637	529507.PMI1631	0.626	0	0.778	0	0.618	0.938	0.8	0.865	0.999
fliN	fliG	7102384	7102377	529507.PMI1638	529507.PMI1631	0.626	0	0.778	0	0.67	0.187	0.8	0.862	0.999
fliN	fliM	7102384	7102383	529507.PMI1638	529507.PMI1637	0.89	0	0.777	0	0.649	0.939	0.8	0.865	0.999
fliG	fliF	7102377	7102376	529507.PMI1631	529507.PMI1630	0.89	0	0.777	0	0.697	0.942	0	0.916	0.999
fliM	fliF	7102383	7102376	529507.PMI1637	529507.PMI1630	0.626	0	0.77	0	0.633	0.931	0	0.834	0.999
flhA	fliI	7102405	7102379	529507.PMI1659	529507.PMI1633	0.381	0	0.778	0	0.385	0.931	0	0.765	0.998
fliI	fliG	7102379	7102377	529507.PMI1633	529507.PMI1631	0.902	0	0.777	0	0.594	0.206	0	0.833	0.998
fliP	fliN	7102386	7102384	529507.PMI1640	529507.PMI1638	0.89	0	0.778	0	0.484	0	0	0.834	0.997
fliN	fliH	7102384	7102378	529507.PMI1638	529507.PMI1632	0.626	0	0	0	0.589	0.931	0	0.788	0.997
fliI	fliF	7102379	7102376	529507.PMI1633	529507.PMI1630	0.902	0	0.771	0	0.586	0	0	0.784	0.997
fliI	fliH	7102379	7102378	529507.PMI1633	529507.PMI1632	0.902	0	0.302	0	0.661	0.546	0	0.736	0.996
fliP	fliM	7102386	7102383	529507.PMI1640	529507.PMI1637	0.89	0	0.755	0	0.486	0	0	0.779	0.996
fliN	fliI	7102384	7102379	529507.PMI1638	529507.PMI1633	0.639	0	0.778	0	0.582	0.522	0	0.752	0.995
fliH	fliF	7102378	7102376	529507.PMI1632	529507.PMI1630	0.89	0	0.623	0	0.584	0	0	0.747	0.995
fliH	fliG	7102378	7102377	529507.PMI1632	529507.PMI1631	0.89	0	0.499	0	0.677	0.172	0	0.745	0.995
flhA	fliH	7102405	7102378	529507.PMI1659	529507.PMI1632	0.381	0	0.232	0	0.347	0.931	0	0.783	0.994
fliM	fliI	7102383	7102379	529507.PMI1637	529507.PMI1633	0.639	0	0.748	0	0.596	0	0	0.832	0.993
fliN	fliF	7102384	7102376	529507.PMI1638	529507.PMI1630	0.626	0	0.768	0	0.594	0	0	0.834	0.993
fliP	fliF	7102386	7102376	529507.PMI1640	529507.PMI1630	0.626	0	0.767	0	0.482	0	0	0.787	0.989
fliM	fliH	7102383	7102378	529507.PMI1637	529507.PMI1632	0.626	0	0.709	0	0.609	0.119	0	0.733	0.988
fliK	fliF	7102381	7102376	529507.PMI1635	529507.PMI1630	0.819	0	0.52	0	0.571	0	0	0.727	0.988
fliP	fliI	7102386	7102379	529507.PMI1640	529507.PMI1633	0.639	0	0.778	0	0.509	0	0	0.752	0.988
fliK	fliG	7102381	7102377	529507.PMI1635	529507.PMI1631	0.819	0	0.505	0	0.584	0	0	0.724	0.988
fliP	fliG	7102386	7102377	529507.PMI1640	529507.PMI1631	0.626	0	0.778	0	0.479	0	0	0.752	0.987
fliM	fliK	7102383	7102381	529507.PMI1637	529507.PMI1635	0.66	0	0.702	0	0.578	0	0	0.722	0.986
flgH	fliF	7102394	7102376	529507.PMI1648	529507.PMI1630	0.381	0	0.774	0	0.504	0	0	0.834	0.986
fliF	fliE	7102376	7102375	529507.PMI1630	529507.PMI1629	0.618	0	0.694	0	0.481	0	0	0.796	0.986
fliK	fliH	7102381	7102378	529507.PMI1635	529507.PMI1632	0.819	0	0.743	0	0.579	0	0	0.342	0.985
flhA	fliF	7102405	7102376	529507.PMI1659	529507.PMI1630	0.381	0	0.776	0	0.498	0	0	0.816	0.985
fliG	fliE	7102377	7102375	529507.PMI1631	529507.PMI1629	0.618	0	0.694	0	0.402	0.172	0	0.761	0.983
fliK	fliI	7102381	7102379	529507.PMI1635	529507.PMI1633	0.831	0	0.232	0	0.606	0	0	0.721	0.983
flgH	fliM	7102394	7102383	529507.PMI1648	529507.PMI1637	0.381	0	0.707	0	0.58	0.206	0	0.765	0.983
flgH	fliG	7102394	7102377	529507.PMI1648	529507.PMI1631	0.381	0	0.687	0	0.584	0.206	0	0.765	0.982
flhA	fliG	7102405	7102377	529507.PMI1659	529507.PMI1631	0.381	0	0.777	0	0.369	0	0	0.785	0.978
flhA	fliN	7102405	7102384	529507.PMI1659	529507.PMI1638	0.381	0	0.778	0	0.27	0	0	0.804	0.977
flhA	fliP	7102405	7102386	529507.PMI1659	529507.PMI1640	0.381	0	0.778	0	0.386	0	0	0.765	0.977
fliM	fliE	7102383	7102375	529507.PMI1637	529507.PMI1629	0.517	0	0.717	0	0.252	0	0	0.785	0.975
flhA	fliM	7102405	7102383	529507.PMI1659	529507.PMI1637	0.381	0	0.747	0	0.358	0	0	0.784	0.975
fliK	fliE	7102381	7102375	529507.PMI1635	529507.PMI1629	0.591	0	0.715	0	0.262	0	0	0.738	0.974
flgH	fliK	7102394	7102381	529507.PMI1648	529507.PMI1635	0.047	0	0.75	0	0.482	0	0	0.812	0.973
fliN	fliK	7102384	7102381	529507.PMI1638	529507.PMI1635	0.66	0	0.267	0	0.578	0	0	0.717	0.966
fliH	fliE	7102378	7102375	529507.PMI1632	529507.PMI1629	0.618	0	0.746	0	0.126	0	0	0.605	0.962
flgH	fliE	7102394	7102375	529507.PMI1648	529507.PMI1629	0.381	0	0.701	0	0.138	0	0	0.788	0.961
fliN	fliE	7102384	7102375	529507.PMI1638	529507.PMI1629	0.517	0	0.397	0	0.276	0	0	0.829	0.959
flgH	fliI	7102394	7102379	529507.PMI1648	529507.PMI1633	0.381	0	0.361	0	0.531	0.206	0	0.752	0.956
flhA	flgH	7102405	7102394	529507.PMI1659	529507.PMI1648	0.381	0	0.533	0	0.358	0	0	0.763	0.95
flgH	fliN	7102394	7102384	529507.PMI1648	529507.PMI1638	0.381	0	0.221	0	0.567	0	0	0.774	0.946
fliP	fliK	7102386	7102381	529507.PMI1640	529507.PMI1635	0.66	0	0.156	0	0.438	0	0	0.701	0.945
fliP	fliH	7102386	7102378	529507.PMI1640	529507.PMI1632	0.626	0	0	0	0.44	0	0	0.747	0.942
fliI	fliE	7102379	7102375	529507.PMI1633	529507.PMI1629	0.629	0	0.301	0	0.15	0	0	0.743	0.935
flgH	fliH	7102394	7102378	529507.PMI1648	529507.PMI1632	0.057	0	0.745	0	0.582	0	0	0.425	0.934
fliP	fliE	7102386	7102375	529507.PMI1640	529507.PMI1629	0.517	0	0.161	0	0.157	0	0	0.789	0.918
flgH	fliP	7102394	7102386	529507.PMI1648	529507.PMI1640	0.381	0	0.181	0	0.323	0	0	0.752	0.903
flhA	fliE	7102405	7102375	529507.PMI1659	529507.PMI1629	0.381	0	0.196	0	0.124	0	0	0.778	0.89
flhA	fliK	7102405	7102381	529507.PMI1659	529507.PMI1635	0.381	0	0.153	0	0.133	0	0	0.743	0.867
fliG	fliF	7102377	7102376	529507.PMI1631	529507.PMI1630	0.89	0	0.777	0	0.697	0.942	0	0.916	0.999
fliN	fliG	7102384	7102377	529507.PMI1638	529507.PMI1631	0.626	0	0.778	0	0.67	0.187	0.8	0.862	0.999
fliN	fliM	7102384	7102383	529507.PMI1638	529507.PMI1637	0.89	0	0.777	0	0.649	0.939	0.8	0.865	0.999
fliM	fliG	7102383	7102377	529507.PMI1637	529507.PMI1631	0.626	0	0.778	0	0.618	0.938	0.8	0.865	0.999
fliM	fliF	7102383	7102376	529507.PMI1637	529507.PMI1630	0.626	0	0.77	0	0.633	0.931	0	0.834	0.999
fliI	fliG	7102379	7102377	529507.PMI1633	529507.PMI1631	0.902	0	0.777	0	0.594	0.206	0	0.833	0.998
fliQ	fliP	7102387	7102386	529507.PMI1641	529507.PMI1640	0.866	0	0.773	0	0.486	0	0	0.834	0.997
fliI	fliF	7102379	7102376	529507.PMI1633	529507.PMI1630	0.902	0	0.771	0	0.586	0	0	0.784	0.997
fliP	fliN	7102386	7102384	529507.PMI1640	529507.PMI1638	0.89	0	0.778	0	0.484	0	0	0.834	0.997
fliN	fliH	7102384	7102378	529507.PMI1638	529507.PMI1632	0.626	0	0	0	0.589	0.931	0	0.788	0.997
fliQ	fliM	7102387	7102383	529507.PMI1641	529507.PMI1637	0.866	0	0.708	0	0.483	0	0	0.834	0.996
fliI	fliH	7102379	7102378	529507.PMI1633	529507.PMI1632	0.902	0	0.302	0	0.661	0.546	0	0.736	0.996
fliP	fliM	7102386	7102383	529507.PMI1640	529507.PMI1637	0.89	0	0.755	0	0.486	0	0	0.779	0.996
fliQ	fliN	7102387	7102384	529507.PMI1641	529507.PMI1638	0.866	0	0.777	0	0.347	0	0	0.841	0.996
flgE	fliK	7102397	7102381	529507.PMI1651	529507.PMI1635	0.155	0	0.456	0	0.502	0.931	0	0.816	0.996
fliN	fliI	7102384	7102379	529507.PMI1638	529507.PMI1633	0.639	0	0.778	0	0.582	0.522	0	0.752	0.995
fliH	fliF	7102378	7102376	529507.PMI1632	529507.PMI1630	0.89	0	0.623	0	0.584	0	0	0.747	0.995
fliH	fliG	7102378	7102377	529507.PMI1632	529507.PMI1631	0.89	0	0.499	0	0.677	0.172	0	0.745	0.995
fliN	fliF	7102384	7102376	529507.PMI1638	529507.PMI1630	0.626	0	0.768	0	0.594	0	0	0.834	0.993
fliM	fliI	7102383	7102379	529507.PMI1637	529507.PMI1633	0.639	0	0.748	0	0.596	0	0	0.832	0.993
fliP	fliF	7102386	7102376	529507.PMI1640	529507.PMI1630	0.626	0	0.767	0	0.482	0	0	0.787	0.989
flgE	flgG	7102397	7102395	529507.PMI1651	529507.PMI1649	0.804	0.704	0.778	0.647	0.687	0	0	0.772	0.989
fliK	fliG	7102381	7102377	529507.PMI1635	529507.PMI1631	0.819	0	0.505	0	0.584	0	0	0.724	0.988
fliM	fliH	7102383	7102378	529507.PMI1637	529507.PMI1632	0.626	0	0.709	0	0.609	0.119	0	0.733	0.988
fliK	fliF	7102381	7102376	529507.PMI1635	529507.PMI1630	0.819	0	0.52	0	0.571	0	0	0.727	0.988
fliP	fliI	7102386	7102379	529507.PMI1640	529507.PMI1633	0.639	0	0.778	0	0.509	0	0	0.752	0.988
flgE	fliG	7102397	7102377	529507.PMI1651	529507.PMI1631	0.381	0	0.773	0	0.562	0	0	0.816	0.987
flgG	fliM	7102395	7102383	529507.PMI1649	529507.PMI1637	0.381	0	0.763	0	0.609	0.119	0	0.787	0.987
fliP	fliG	7102386	7102377	529507.PMI1640	529507.PMI1631	0.626	0	0.778	0	0.479	0	0	0.752	0.987
flgG	fliN	7102395	7102384	529507.PMI1649	529507.PMI1638	0.381	0	0.774	0	0.569	0.128	0	0.778	0.986
fliM	fliK	7102383	7102381	529507.PMI1637	529507.PMI1635	0.66	0	0.702	0	0.578	0	0	0.722	0.986
flgG	fliG	7102395	7102377	529507.PMI1649	529507.PMI1631	0.381	0	0.778	0	0.578	0.164	0	0.757	0.986
fliQ	fliG	7102387	7102377	529507.PMI1641	529507.PMI1631	0.616	0	0.772	0	0.367	0	0	0.786	0.986
flgE	fliN	7102397	7102384	529507.PMI1651	529507.PMI1638	0.381	0	0.762	0	0.482	0	0	0.834	0.985
fliK	fliH	7102381	7102378	529507.PMI1635	529507.PMI1632	0.819	0	0.743	0	0.579	0	0	0.342	0.985
flgE	fliM	7102397	7102383	529507.PMI1651	529507.PMI1637	0.381	0	0.698	0	0.591	0	0	0.834	0.985
fliQ	fliI	7102387	7102379	529507.PMI1641	529507.PMI1633	0.629	0	0.764	0	0.278	0	0	0.787	0.984
flgG	fliF	7102395	7102376	529507.PMI1649	529507.PMI1630	0.381	0	0.777	0	0.571	0	0	0.76	0.983
fliK	fliI	7102381	7102379	529507.PMI1635	529507.PMI1633	0.831	0	0.232	0	0.606	0	0	0.721	0.983
flgG	fliI	7102395	7102379	529507.PMI1649	529507.PMI1633	0.381	0	0.774	0	0.575	0	0	0.752	0.983
fliQ	fliF	7102387	7102376	529507.PMI1641	529507.PMI1630	0.616	0	0.731	0	0.279	0	0	0.789	0.982
flgE	fliF	7102397	7102376	529507.PMI1651	529507.PMI1630	0.381	0	0.765	0	0.481	0	0	0.799	0.982
flgG	fliP	7102395	7102386	529507.PMI1649	529507.PMI1640	0.381	0	0.776	0	0.26	0	0	0.778	0.974
flgE	fliI	7102397	7102379	529507.PMI1651	529507.PMI1633	0.381	0	0.757	0	0.354	0	0	0.752	0.972
fliN	fliK	7102384	7102381	529507.PMI1638	529507.PMI1635	0.66	0	0.267	0	0.578	0	0	0.717	0.966
flgE	fliP	7102397	7102386	529507.PMI1651	529507.PMI1640	0.381	0	0.749	0	0.12	0	0	0.778	0.965
flgG	fliQ	7102395	7102387	529507.PMI1649	529507.PMI1641	0.381	0	0.683	0	0.127	0	0	0.784	0.958
flgE	fliQ	7102397	7102387	529507.PMI1651	529507.PMI1641	0.381	0	0.58	0	0.102	0	0	0.804	0.948
fliP	fliK	7102386	7102381	529507.PMI1640	529507.PMI1635	0.66	0	0.156	0	0.438	0	0	0.701	0.945
fliP	fliH	7102386	7102378	529507.PMI1640	529507.PMI1632	0.626	0	0	0	0.44	0	0	0.747	0.942
flgE	fliH	7102397	7102378	529507.PMI1651	529507.PMI1632	0.381	0	0.34	0	0.552	0	0	0.646	0.926
fliQ	fliK	7102387	7102381	529507.PMI1641	529507.PMI1635	0.647	0	0	0	0.253	0	0	0.723	0.921
fliQ	fliH	7102387	7102378	529507.PMI1641	529507.PMI1632	0.616	0	0	0	0.156	0	0	0.743	0.909
flgG	fliK	7102395	7102381	529507.PMI1649	529507.PMI1635	0.064	0	0.194	0	0.584	0	0	0.719	0.9
flgG	fliH	7102395	7102378	529507.PMI1649	529507.PMI1632	0.299	0	0	0	0.58	0	0	0.475	0.832
fliN	fliM	7102384	7102383	529507.PMI1638	529507.PMI1637	0.89	0	0.777	0	0.649	0.939	0.8	0.865	0.999
fliM	fliF	7102383	7102376	529507.PMI1637	529507.PMI1630	0.626	0	0.77	0	0.633	0.931	0	0.834	0.999
fliM	fliG	7102383	7102377	529507.PMI1637	529507.PMI1631	0.626	0	0.778	0	0.618	0.938	0.8	0.865	0.999
fliG	fliF	7102377	7102376	529507.PMI1631	529507.PMI1630	0.89	0	0.777	0	0.697	0.942	0	0.916	0.999
fliN	fliG	7102384	7102377	529507.PMI1638	529507.PMI1631	0.626	0	0.778	0	0.67	0.187	0.8	0.862	0.999
fliP	fliN	7102386	7102384	529507.PMI1640	529507.PMI1638	0.89	0	0.778	0	0.484	0	0	0.834	0.997
fliR	fliP	7102388	7102386	529507.PMI1642	529507.PMI1640	0.866	0	0.777	0	0.505	0	0	0.835	0.997
fliN	fliH	7102384	7102378	529507.PMI1638	529507.PMI1632	0.626	0	0	0	0.589	0.931	0	0.788	0.997
fliR	fliN	7102388	7102384	529507.PMI1642	529507.PMI1638	0.866	0	0.777	0	0.084	0.259	0	0.848	0.996
fliP	fliM	7102386	7102383	529507.PMI1640	529507.PMI1637	0.89	0	0.755	0	0.486	0	0	0.779	0.996
fliH	fliF	7102378	7102376	529507.PMI1632	529507.PMI1630	0.89	0	0.623	0	0.584	0	0	0.747	0.995
fliH	fliG	7102378	7102377	529507.PMI1632	529507.PMI1631	0.89	0	0.499	0	0.677	0.172	0	0.745	0.995
fliR	fliM	7102388	7102383	529507.PMI1642	529507.PMI1637	0.866	0	0.774	0	0.087	0	0	0.834	0.994
fliM	fliL	7102383	7102382	529507.PMI1637	529507.PMI1636	0.89	0	0.749	0	0.658	0.17	0	0.308	0.993
fliN	fliF	7102384	7102376	529507.PMI1638	529507.PMI1630	0.626	0	0.768	0	0.594	0	0	0.834	0.993
fliP	fliF	7102386	7102376	529507.PMI1640	529507.PMI1630	0.626	0	0.767	0	0.482	0	0	0.787	0.989
fliJ	fliH	7102380	7102378	529507.PMI1634	529507.PMI1632	0.819	0	0.778	0	0.544	0	0	0.452	0.988
fliK	fliG	7102381	7102377	529507.PMI1635	529507.PMI1631	0.819	0	0.505	0	0.584	0	0	0.724	0.988
fliM	fliH	7102383	7102378	529507.PMI1637	529507.PMI1632	0.626	0	0.709	0	0.609	0.119	0	0.733	0.988
fliK	fliF	7102381	7102376	529507.PMI1635	529507.PMI1630	0.819	0	0.52	0	0.571	0	0	0.727	0.988
fliP	fliG	7102386	7102377	529507.PMI1640	529507.PMI1631	0.626	0	0.778	0	0.479	0	0	0.752	0.987
fliM	fliK	7102383	7102381	529507.PMI1637	529507.PMI1635	0.66	0	0.702	0	0.578	0	0	0.722	0.986
fliK	fliJ	7102381	7102380	529507.PMI1635	529507.PMI1634	0.89	0	0.713	0	0.573	0	0	0.142	0.986
fliK	fliH	7102381	7102378	529507.PMI1635	529507.PMI1632	0.819	0	0.743	0	0.579	0	0	0.342	0.985
fliJ	fliF	7102380	7102376	529507.PMI1634	529507.PMI1630	0.819	0	0.561	0	0.553	0	0	0.562	0.982
fliM	fliJ	7102383	7102380	529507.PMI1637	529507.PMI1634	0.66	0	0.655	0	0.573	0	0	0.653	0.98
fliR	fliF	7102388	7102376	529507.PMI1642	529507.PMI1630	0.616	0	0.774	0	0.063	0	0	0.763	0.978
fliR	fliG	7102388	7102377	529507.PMI1642	529507.PMI1631	0.616	0	0.777	0	0.07	0	0	0.761	0.978
fliJ	fliG	7102380	7102377	529507.PMI1634	529507.PMI1631	0.819	0	0.374	0	0.565	0	0	0.558	0.975
fliN	fliL	7102384	7102382	529507.PMI1638	529507.PMI1636	0.89	0	0	0	0.627	0	0	0.421	0.974
fliL	fliH	7102382	7102378	529507.PMI1636	529507.PMI1632	0.626	0	0.774	0	0.592	0	0	0.249	0.97
fliN	fliK	7102384	7102381	529507.PMI1638	529507.PMI1635	0.66	0	0.267	0	0.578	0	0	0.717	0.966
fliL	fliJ	7102382	7102380	529507.PMI1636	529507.PMI1634	0.66	0	0.778	0	0.565	0	0	0.078	0.965
fliO	fliL	7102385	7102382	529507.PMI1639	529507.PMI1636	0.89	0	0.666	0	0	0	0	0	0.961
fliR	fliH	7102388	7102378	529507.PMI1642	529507.PMI1632	0.616	0	0.554	0	0.082	0	0	0.776	0.96
fliL	fliK	7102382	7102381	529507.PMI1636	529507.PMI1635	0.66	0	0.686	0	0.579	0	0	0.141	0.956
fliL	fliF	7102382	7102376	529507.PMI1636	529507.PMI1630	0.626	0	0.646	0	0.583	0	0	0.264	0.954
fliO	fliM	7102385	7102383	529507.PMI1639	529507.PMI1637	0.89	0	0.596	0	0	0	0	0	0.953
fliR	fliK	7102388	7102381	529507.PMI1642	529507.PMI1635	0.647	0	0.48	0	0.065	0	0	0.744	0.95
fliP	fliL	7102386	7102382	529507.PMI1640	529507.PMI1636	0.89	0	0	0	0.339	0	0	0.357	0.949
fliP	fliK	7102386	7102381	529507.PMI1640	529507.PMI1635	0.66	0	0.156	0	0.438	0	0	0.701	0.945
fliR	fliL	7102388	7102382	529507.PMI1642	529507.PMI1636	0.866	0	0.471	0	0.078	0	0	0.242	0.944
fliL	fliG	7102382	7102377	529507.PMI1636	529507.PMI1631	0.626	0	0.502	0	0.603	0	0	0.312	0.942
fliP	fliH	7102386	7102378	529507.PMI1640	529507.PMI1632	0.626	0	0	0	0.44	0	0	0.747	0.942
fliP	fliJ	7102386	7102380	529507.PMI1640	529507.PMI1634	0.66	0	0	0	0.45	0	0	0.573	0.913
fliO	fliJ	7102385	7102380	529507.PMI1639	529507.PMI1634	0.654	0	0.756	0	0	0	0	0	0.912
fliR	fliJ	7102388	7102380	529507.PMI1642	529507.PMI1634	0.647	0	0.36	0	0.086	0	0	0.605	0.907
fliO	fliH	7102385	7102378	529507.PMI1639	529507.PMI1632	0.598	0	0.759	0	0	0	0	0	0.899
fliN	fliJ	7102384	7102380	529507.PMI1638	529507.PMI1634	0.66	0	0	0	0.56	0	0	0.353	0.895
fliO	fliK	7102385	7102381	529507.PMI1639	529507.PMI1635	0.66	0	0.694	0	0	0	0	0	0.891
fliO	fliN	7102385	7102384	529507.PMI1639	529507.PMI1638	0.89	0	0	0	0	0	0	0	0.89
fliP	fliO	7102386	7102385	529507.PMI1640	529507.PMI1639	0.89	0	0	0	0	0	0	0	0.89
fliR	fliO	7102388	7102385	529507.PMI1642	529507.PMI1639	0.866	0	0.21	0	0	0	0	0	0.89
fliO	fliF	7102385	7102376	529507.PMI1639	529507.PMI1630	0.582	0	0.487	0	0	0	0	0	0.777
fliO	fliG	7102385	7102377	529507.PMI1639	529507.PMI1631	0.593	0	0.233	0	0	0	0	0	0.675
fliG	fliF	7102377	7102376	529507.PMI1631	529507.PMI1630	0.89	0	0.777	0	0.697	0.942	0	0.916	0.999
fliN	fliM	7102384	7102383	529507.PMI1638	529507.PMI1637	0.89	0	0.777	0	0.649	0.939	0.8	0.865	0.999
fliM	fliG	7102383	7102377	529507.PMI1637	529507.PMI1631	0.626	0	0.778	0	0.618	0.938	0.8	0.865	0.999
fliM	fliF	7102383	7102376	529507.PMI1637	529507.PMI1630	0.626	0	0.77	0	0.633	0.931	0	0.834	0.999
fliN	fliG	7102384	7102377	529507.PMI1638	529507.PMI1631	0.626	0	0.778	0	0.67	0.187	0.8	0.862	0.999
fliI	fliG	7102379	7102377	529507.PMI1633	529507.PMI1631	0.902	0	0.777	0	0.594	0.206	0	0.833	0.998
fliN	fliH	7102384	7102378	529507.PMI1638	529507.PMI1632	0.626	0	0	0	0.589	0.931	0	0.788	0.997
fliQ	fliP	7102387	7102386	529507.PMI1641	529507.PMI1640	0.866	0	0.773	0	0.486	0	0	0.834	0.997
fliR	fliP	7102388	7102386	529507.PMI1642	529507.PMI1640	0.866	0	0.777	0	0.505	0	0	0.835	0.997
fliI	fliF	7102379	7102376	529507.PMI1633	529507.PMI1630	0.902	0	0.771	0	0.586	0	0	0.784	0.997
fliP	fliN	7102386	7102384	529507.PMI1640	529507.PMI1638	0.89	0	0.778	0	0.484	0	0	0.834	0.997
fliR	fliN	7102388	7102384	529507.PMI1642	529507.PMI1638	0.866	0	0.777	0	0.084	0.259	0	0.848	0.996
fliR	fliQ	7102388	7102387	529507.PMI1642	529507.PMI1641	0.89	0	0.772	0	0.195	0	0	0.865	0.996
fliI	fliH	7102379	7102378	529507.PMI1633	529507.PMI1632	0.902	0	0.302	0	0.661	0.546	0	0.736	0.996
fliQ	fliN	7102387	7102384	529507.PMI1641	529507.PMI1638	0.866	0	0.777	0	0.347	0	0	0.841	0.996
fliQ	fliM	7102387	7102383	529507.PMI1641	529507.PMI1637	0.866	0	0.708	0	0.483	0	0	0.834	0.996
fliP	fliM	7102386	7102383	529507.PMI1640	529507.PMI1637	0.89	0	0.755	0	0.486	0	0	0.779	0.996
fliN	fliI	7102384	7102379	529507.PMI1638	529507.PMI1633	0.639	0	0.778	0	0.582	0.522	0	0.752	0.995
fliH	fliF	7102378	7102376	529507.PMI1632	529507.PMI1630	0.89	0	0.623	0	0.584	0	0	0.747	0.995
fliH	fliG	7102378	7102377	529507.PMI1632	529507.PMI1631	0.89	0	0.499	0	0.677	0.172	0	0.745	0.995
cheY	fliM	7102408	7102383	529507.PMI1662	529507.PMI1637	0.381	0	0.626	0	0.133	0.86	0	0.82	0.994
fliR	fliM	7102388	7102383	529507.PMI1642	529507.PMI1637	0.866	0	0.774	0	0.087	0	0	0.834	0.994
fliM	fliI	7102383	7102379	529507.PMI1637	529507.PMI1633	0.639	0	0.748	0	0.596	0	0	0.832	0.993
fliN	fliF	7102384	7102376	529507.PMI1638	529507.PMI1630	0.626	0	0.768	0	0.594	0	0	0.834	0.993
fliM	fliL	7102383	7102382	529507.PMI1637	529507.PMI1636	0.89	0	0.749	0	0.658	0.17	0	0.308	0.993
fliP	fliF	7102386	7102376	529507.PMI1640	529507.PMI1630	0.626	0	0.767	0	0.482	0	0	0.787	0.989
fliP	fliI	7102386	7102379	529507.PMI1640	529507.PMI1633	0.639	0	0.778	0	0.509	0	0	0.752	0.988
fliM	fliH	7102383	7102378	529507.PMI1637	529507.PMI1632	0.626	0	0.709	0	0.609	0.119	0	0.733	0.988
fliP	fliG	7102386	7102377	529507.PMI1640	529507.PMI1631	0.626	0	0.778	0	0.479	0	0	0.752	0.987
fliQ	fliG	7102387	7102377	529507.PMI1641	529507.PMI1631	0.616	0	0.772	0	0.367	0	0	0.786	0.986
fliQ	fliI	7102387	7102379	529507.PMI1641	529507.PMI1633	0.629	0	0.764	0	0.278	0	0	0.787	0.984
fliQ	fliF	7102387	7102376	529507.PMI1641	529507.PMI1630	0.616	0	0.731	0	0.279	0	0	0.789	0.982
fliR	fliF	7102388	7102376	529507.PMI1642	529507.PMI1630	0.616	0	0.774	0	0.063	0	0	0.763	0.978
fliR	fliI	7102388	7102379	529507.PMI1642	529507.PMI1633	0.629	0	0.778	0	0.092	0	0	0.752	0.978
fliR	fliG	7102388	7102377	529507.PMI1642	529507.PMI1631	0.616	0	0.777	0	0.07	0	0	0.761	0.978
fliN	fliL	7102384	7102382	529507.PMI1638	529507.PMI1636	0.89	0	0	0	0.627	0	0	0.421	0.974
fliL	fliH	7102382	7102378	529507.PMI1636	529507.PMI1632	0.626	0	0.774	0	0.592	0	0	0.249	0.97
fliR	fliH	7102388	7102378	529507.PMI1642	529507.PMI1632	0.616	0	0.554	0	0.082	0	0	0.776	0.96
cheY	fliN	7102408	7102384	529507.PMI1662	529507.PMI1638	0.381	0	0	0	0.158	0	0.8	0.654	0.959
fliL	fliF	7102382	7102376	529507.PMI1636	529507.PMI1630	0.626	0	0.646	0	0.583	0	0	0.264	0.954
fliP	fliL	7102386	7102382	529507.PMI1640	529507.PMI1636	0.89	0	0	0	0.339	0	0	0.357	0.949
fliR	fliL	7102388	7102382	529507.PMI1642	529507.PMI1636	0.866	0	0.471	0	0.078	0	0	0.242	0.944
fliP	fliH	7102386	7102378	529507.PMI1640	529507.PMI1632	0.626	0	0	0	0.44	0	0	0.747	0.942
fliL	fliG	7102382	7102377	529507.PMI1636	529507.PMI1631	0.626	0	0.502	0	0.603	0	0	0.312	0.942
fliQ	fliL	7102387	7102382	529507.PMI1641	529507.PMI1636	0.866	0	0	0	0.325	0	0	0.219	0.923
fliQ	fliH	7102387	7102378	529507.PMI1641	529507.PMI1632	0.616	0	0	0	0.156	0	0	0.743	0.909
cheY	fliG	7102408	7102377	529507.PMI1662	529507.PMI1631	0.381	0	0.294	0	0.253	0	0	0.683	0.882
fliL	fliI	7102382	7102379	529507.PMI1636	529507.PMI1633	0.639	0	0.168	0	0.553	0	0	0	0.854
cheY	fliF	7102408	7102376	529507.PMI1662	529507.PMI1630	0.381	0	0.217	0	0.157	0	0	0.581	0.805
cheY	fliI	7102408	7102379	529507.PMI1662	529507.PMI1633	0.35	0	0	0	0.117	0	0	0.233	0.521
cheY	fliP	7102408	7102386	529507.PMI1662	529507.PMI1640	0.381	0	0	0	0.068	0	0	0.158	0.472
cheY	fliL	7102408	7102382	529507.PMI1662	529507.PMI1636	0.346	0	0	0	0.132	0	0	0.126	0.46
cheY	fliQ	7102408	7102387	529507.PMI1662	529507.PMI1641	0.381	0	0	0	0.062	0	0	0.119	0.444
cheY	fliR	7102408	7102388	529507.PMI1662	529507.PMI1642	0.381	0	0	0	0	0	0	0.138	0.443
cheY	fliH	7102408	7102378	529507.PMI1662	529507.PMI1632	0.062	0	0	0	0.228	0	0	0.256	0.414
fliM	fliG	7102383	7102377	529507.PMI1637	529507.PMI1631	0.626	0	0.778	0	0.618	0.938	0.8	0.865	0.999
fliM	fliF	7102383	7102376	529507.PMI1637	529507.PMI1630	0.626	0	0.77	0	0.633	0.931	0	0.834	0.999
fliN	fliM	7102384	7102383	529507.PMI1638	529507.PMI1637	0.89	0	0.777	0	0.649	0.939	0.8	0.865	0.999
fliG	fliF	7102377	7102376	529507.PMI1631	529507.PMI1630	0.89	0	0.777	0	0.697	0.942	0	0.916	0.999
fliN	fliG	7102384	7102377	529507.PMI1638	529507.PMI1631	0.626	0	0.778	0	0.67	0.187	0.8	0.862	0.999
flhB	flhA	7102406	7102405	529507.PMI1660	529507.PMI1659	0.902	0	0.778	0	0.346	0.931	0	0.797	0.999
flhA	fliI	7102405	7102379	529507.PMI1659	529507.PMI1633	0.381	0	0.778	0	0.385	0.931	0	0.765	0.998
fliI	fliG	7102379	7102377	529507.PMI1633	529507.PMI1631	0.902	0	0.777	0	0.594	0.206	0	0.833	0.998
fliI	fliF	7102379	7102376	529507.PMI1633	529507.PMI1630	0.902	0	0.771	0	0.586	0	0	0.784	0.997
fliR	fliP	7102388	7102386	529507.PMI1642	529507.PMI1640	0.866	0	0.777	0	0.505	0	0	0.835	0.997
fliP	fliN	7102386	7102384	529507.PMI1640	529507.PMI1638	0.89	0	0.778	0	0.484	0	0	0.834	0.997
fliQ	fliP	7102387	7102386	529507.PMI1641	529507.PMI1640	0.866	0	0.773	0	0.486	0	0	0.834	0.997
fliQ	fliN	7102387	7102384	529507.PMI1641	529507.PMI1638	0.866	0	0.777	0	0.347	0	0	0.841	0.996
fliQ	fliM	7102387	7102383	529507.PMI1641	529507.PMI1637	0.866	0	0.708	0	0.483	0	0	0.834	0.996
fliP	fliM	7102386	7102383	529507.PMI1640	529507.PMI1637	0.89	0	0.755	0	0.486	0	0	0.779	0.996
fliR	fliQ	7102388	7102387	529507.PMI1642	529507.PMI1641	0.89	0	0.772	0	0.195	0	0	0.865	0.996
fliR	fliN	7102388	7102384	529507.PMI1642	529507.PMI1638	0.866	0	0.777	0	0.084	0.259	0	0.848	0.996
fliN	fliI	7102384	7102379	529507.PMI1638	529507.PMI1633	0.639	0	0.778	0	0.582	0.522	0	0.752	0.995
fliR	fliM	7102388	7102383	529507.PMI1642	529507.PMI1637	0.866	0	0.774	0	0.087	0	0	0.834	0.994
fliN	fliF	7102384	7102376	529507.PMI1638	529507.PMI1630	0.626	0	0.768	0	0.594	0	0	0.834	0.993
fliM	fliI	7102383	7102379	529507.PMI1637	529507.PMI1633	0.639	0	0.748	0	0.596	0	0	0.832	0.993
flhB	fliR	7102406	7102388	529507.PMI1660	529507.PMI1642	0.381	0.575	0.775	0	0.14	0	0	0.865	0.991
fliP	fliF	7102386	7102376	529507.PMI1640	529507.PMI1630	0.626	0	0.767	0	0.482	0	0	0.787	0.989
fliP	fliI	7102386	7102379	529507.PMI1640	529507.PMI1633	0.639	0	0.778	0	0.509	0	0	0.752	0.988
flgG	fliM	7102395	7102383	529507.PMI1649	529507.PMI1637	0.381	0	0.763	0	0.609	0.119	0	0.787	0.987
fliP	fliG	7102386	7102377	529507.PMI1640	529507.PMI1631	0.626	0	0.778	0	0.479	0	0	0.752	0.987
flgG	fliG	7102395	7102377	529507.PMI1649	529507.PMI1631	0.381	0	0.778	0	0.578	0.164	0	0.757	0.986
fliQ	fliG	7102387	7102377	529507.PMI1641	529507.PMI1631	0.616	0	0.772	0	0.367	0	0	0.786	0.986
flhB	fliN	7102406	7102384	529507.PMI1660	529507.PMI1638	0.381	0	0.777	0	0.459	0	0	0.834	0.986
flgG	fliN	7102395	7102384	529507.PMI1649	529507.PMI1638	0.381	0	0.774	0	0.569	0.128	0	0.778	0.986
flhA	fliF	7102405	7102376	529507.PMI1659	529507.PMI1630	0.381	0	0.776	0	0.498	0	0	0.816	0.985
flhB	fliG	7102406	7102377	529507.PMI1660	529507.PMI1631	0.381	0	0.776	0	0.45	0.171	0	0.788	0.984
fliQ	fliI	7102387	7102379	529507.PMI1641	529507.PMI1633	0.629	0	0.764	0	0.278	0	0	0.787	0.984
flhB	fliM	7102406	7102383	529507.PMI1660	529507.PMI1637	0.381	0	0.75	0	0.482	0	0	0.813	0.983
flgG	fliI	7102395	7102379	529507.PMI1649	529507.PMI1633	0.381	0	0.774	0	0.575	0	0	0.752	0.983
flgG	fliF	7102395	7102376	529507.PMI1649	529507.PMI1630	0.381	0	0.777	0	0.571	0	0	0.76	0.983
fliQ	fliF	7102387	7102376	529507.PMI1641	529507.PMI1630	0.616	0	0.731	0	0.279	0	0	0.789	0.982
flhB	flgG	7102406	7102395	529507.PMI1660	529507.PMI1649	0.381	0	0.774	0	0.29	0.237	0	0.787	0.98
flhB	fliP	7102406	7102386	529507.PMI1660	529507.PMI1640	0.381	0	0.778	0	0.391	0	0	0.788	0.979
flhB	fliQ	7102406	7102387	529507.PMI1660	529507.PMI1641	0.381	0	0.747	0	0.263	0	0	0.841	0.979
fliR	fliI	7102388	7102379	529507.PMI1642	529507.PMI1633	0.629	0	0.778	0	0.092	0	0	0.752	0.978
flhB	fliF	7102406	7102376	529507.PMI1660	529507.PMI1630	0.381	0	0.759	0	0.469	0	0	0.761	0.978
fliR	fliG	7102388	7102377	529507.PMI1642	529507.PMI1631	0.616	0	0.777	0	0.07	0	0	0.761	0.978
fliR	fliF	7102388	7102376	529507.PMI1642	529507.PMI1630	0.616	0	0.774	0	0.063	0	0	0.763	0.978
flhA	fliG	7102405	7102377	529507.PMI1659	529507.PMI1631	0.381	0	0.777	0	0.369	0	0	0.785	0.978
flhA	fliQ	7102405	7102387	529507.PMI1659	529507.PMI1641	0.381	0	0.766	0	0.167	0	0	0.835	0.977
flhA	fliN	7102405	7102384	529507.PMI1659	529507.PMI1638	0.381	0	0.778	0	0.27	0	0	0.804	0.977
flhA	fliP	7102405	7102386	529507.PMI1659	529507.PMI1640	0.381	0	0.778	0	0.386	0	0	0.765	0.977
flhA	fliR	7102405	7102388	529507.PMI1659	529507.PMI1642	0.381	0	0.775	0	0.063	0	0	0.834	0.975
flhA	fliM	7102405	7102383	529507.PMI1659	529507.PMI1637	0.381	0	0.747	0	0.358	0	0	0.784	0.975
flgG	fliP	7102395	7102386	529507.PMI1649	529507.PMI1640	0.381	0	0.776	0	0.26	0	0	0.778	0.974
flhB	fliI	7102406	7102379	529507.PMI1660	529507.PMI1633	0.381	0	0.778	0	0.348	0	0	0.752	0.974
flhA	flgG	7102405	7102395	529507.PMI1659	529507.PMI1649	0.381	0	0.776	0	0.14	0	0	0.787	0.971
flgG	fliR	7102395	7102388	529507.PMI1649	529507.PMI1642	0.381	0	0.763	0	0.062	0	0	0.788	0.967
flgG	fliQ	7102395	7102387	529507.PMI1649	529507.PMI1641	0.381	0	0.683	0	0.127	0	0	0.784	0.958
fliN	fliM	7102384	7102383	529507.PMI1638	529507.PMI1637	0.89	0	0.777	0	0.649	0.939	0.8	0.865	0.999
fliM	fliG	7102383	7102377	529507.PMI1637	529507.PMI1631	0.626	0	0.778	0	0.618	0.938	0.8	0.865	0.999
fliM	fliF	7102383	7102376	529507.PMI1637	529507.PMI1630	0.626	0	0.77	0	0.633	0.931	0	0.834	0.999
flhB	flhA	7102406	7102405	529507.PMI1660	529507.PMI1659	0.902	0	0.778	0	0.346	0.931	0	0.797	0.999
fliG	fliF	7102377	7102376	529507.PMI1631	529507.PMI1630	0.89	0	0.777	0	0.697	0.942	0	0.916	0.999
fliN	fliG	7102384	7102377	529507.PMI1638	529507.PMI1631	0.626	0	0.778	0	0.67	0.187	0.8	0.862	0.999
fliI	fliG	7102379	7102377	529507.PMI1633	529507.PMI1631	0.902	0	0.777	0	0.594	0.206	0	0.833	0.998
flhA	fliI	7102405	7102379	529507.PMI1659	529507.PMI1633	0.381	0	0.778	0	0.385	0.931	0	0.765	0.998
fliP	fliN	7102386	7102384	529507.PMI1640	529507.PMI1638	0.89	0	0.778	0	0.484	0	0	0.834	0.997
fliQ	fliP	7102387	7102386	529507.PMI1641	529507.PMI1640	0.866	0	0.773	0	0.486	0	0	0.834	0.997
fliI	fliF	7102379	7102376	529507.PMI1633	529507.PMI1630	0.902	0	0.771	0	0.586	0	0	0.784	0.997
fliR	fliP	7102388	7102386	529507.PMI1642	529507.PMI1640	0.866	0	0.777	0	0.505	0	0	0.835	0.997
fliQ	fliM	7102387	7102383	529507.PMI1641	529507.PMI1637	0.866	0	0.708	0	0.483	0	0	0.834	0.996
fliR	fliN	7102388	7102384	529507.PMI1642	529507.PMI1638	0.866	0	0.777	0	0.084	0.259	0	0.848	0.996
fliP	fliM	7102386	7102383	529507.PMI1640	529507.PMI1637	0.89	0	0.755	0	0.486	0	0	0.779	0.996
fliQ	fliN	7102387	7102384	529507.PMI1641	529507.PMI1638	0.866	0	0.777	0	0.347	0	0	0.841	0.996
fliR	fliQ	7102388	7102387	529507.PMI1642	529507.PMI1641	0.89	0	0.772	0	0.195	0	0	0.865	0.996
fliN	fliI	7102384	7102379	529507.PMI1638	529507.PMI1633	0.639	0	0.778	0	0.582	0.522	0	0.752	0.995
fliR	fliM	7102388	7102383	529507.PMI1642	529507.PMI1637	0.866	0	0.774	0	0.087	0	0	0.834	0.994
fliM	fliI	7102383	7102379	529507.PMI1637	529507.PMI1633	0.639	0	0.748	0	0.596	0	0	0.832	0.993
fliN	fliF	7102384	7102376	529507.PMI1638	529507.PMI1630	0.626	0	0.768	0	0.594	0	0	0.834	0.993
flhB	fliR	7102406	7102388	529507.PMI1660	529507.PMI1642	0.381	0.575	0.775	0	0.14	0	0	0.865	0.991
fliP	fliF	7102386	7102376	529507.PMI1640	529507.PMI1630	0.626	0	0.767	0	0.482	0	0	0.787	0.989
fliP	fliI	7102386	7102379	529507.PMI1640	529507.PMI1633	0.639	0	0.778	0	0.509	0	0	0.752	0.988
fliP	fliG	7102386	7102377	529507.PMI1640	529507.PMI1631	0.626	0	0.778	0	0.479	0	0	0.752	0.987
fliQ	fliG	7102387	7102377	529507.PMI1641	529507.PMI1631	0.616	0	0.772	0	0.367	0	0	0.786	0.986
flgC	fliN	7102399	7102384	529507.PMI1653	529507.PMI1638	0.381	0	0.778	0	0.524	0.178	0	0.789	0.986
flhB	fliN	7102406	7102384	529507.PMI1660	529507.PMI1638	0.381	0	0.777	0	0.459	0	0	0.834	0.986
flhA	fliF	7102405	7102376	529507.PMI1659	529507.PMI1630	0.381	0	0.776	0	0.498	0	0	0.816	0.985
flgC	fliF	7102399	7102376	529507.PMI1653	529507.PMI1630	0.381	0	0.778	0	0.508	0	0	0.797	0.984
flhB	fliG	7102406	7102377	529507.PMI1660	529507.PMI1631	0.381	0	0.776	0	0.45	0.171	0	0.788	0.984
flgC	fliG	7102399	7102377	529507.PMI1653	529507.PMI1631	0.381	0	0.778	0	0.578	0	0	0.761	0.984
fliQ	fliI	7102387	7102379	529507.PMI1641	529507.PMI1633	0.629	0	0.764	0	0.278	0	0	0.787	0.984
flhB	fliM	7102406	7102383	529507.PMI1660	529507.PMI1637	0.381	0	0.75	0	0.482	0	0	0.813	0.983
flgC	fliM	7102399	7102383	529507.PMI1653	529507.PMI1637	0.381	0	0.767	0	0.575	0	0	0.761	0.983
fliQ	fliF	7102387	7102376	529507.PMI1641	529507.PMI1630	0.616	0	0.731	0	0.279	0	0	0.789	0.982
flhB	flgC	7102406	7102399	529507.PMI1660	529507.PMI1653	0.381	0	0.777	0	0.173	0.121	0	0.834	0.98
flhB	fliQ	7102406	7102387	529507.PMI1660	529507.PMI1641	0.381	0	0.747	0	0.263	0	0	0.841	0.979
flhB	fliP	7102406	7102386	529507.PMI1660	529507.PMI1640	0.381	0	0.778	0	0.391	0	0	0.788	0.979
fliR	fliF	7102388	7102376	529507.PMI1642	529507.PMI1630	0.616	0	0.774	0	0.063	0	0	0.763	0.978
fliR	fliG	7102388	7102377	529507.PMI1642	529507.PMI1631	0.616	0	0.777	0	0.07	0	0	0.761	0.978
flhA	fliG	7102405	7102377	529507.PMI1659	529507.PMI1631	0.381	0	0.777	0	0.369	0	0	0.785	0.978
flhB	fliF	7102406	7102376	529507.PMI1660	529507.PMI1630	0.381	0	0.759	0	0.469	0	0	0.761	0.978
fliR	fliI	7102388	7102379	529507.PMI1642	529507.PMI1633	0.629	0	0.778	0	0.092	0	0	0.752	0.978
flhA	fliN	7102405	7102384	529507.PMI1659	529507.PMI1638	0.381	0	0.778	0	0.27	0	0	0.804	0.977
flhA	fliP	7102405	7102386	529507.PMI1659	529507.PMI1640	0.381	0	0.778	0	0.386	0	0	0.765	0.977
flhA	fliQ	7102405	7102387	529507.PMI1659	529507.PMI1641	0.381	0	0.766	0	0.167	0	0	0.835	0.977
flgC	fliI	7102399	7102379	529507.PMI1653	529507.PMI1633	0.381	0	0.777	0	0.381	0	0	0.752	0.975
flhA	fliM	7102405	7102383	529507.PMI1659	529507.PMI1637	0.381	0	0.747	0	0.358	0	0	0.784	0.975
flhA	fliR	7102405	7102388	529507.PMI1659	529507.PMI1642	0.381	0	0.775	0	0.063	0	0	0.834	0.975
flhB	fliI	7102406	7102379	529507.PMI1660	529507.PMI1633	0.381	0	0.778	0	0.348	0	0	0.752	0.974
flhA	flgC	7102405	7102399	529507.PMI1659	529507.PMI1653	0.381	0	0.778	0	0.166	0	0	0.789	0.972
flgC	fliP	7102399	7102386	529507.PMI1653	529507.PMI1640	0.381	0	0.778	0	0.128	0	0	0.789	0.971
flgC	fliQ	7102399	7102387	529507.PMI1653	529507.PMI1641	0.381	0	0.763	0	0.122	0	0	0.796	0.97
flgC	fliR	7102399	7102388	529507.PMI1653	529507.PMI1642	0.381	0	0.77	0	0	0	0	0.805	0.969
flgD	flgE	7102398	7102397	529507.PMI1652	529507.PMI1651	0.824	0.704	0.712	0	0.813	0.176	0	0.842	0.999
flgB	flgC	7102400	7102399	529507.PMI1654	529507.PMI1653	0.89	0	0.756	0	0.844	0	0	0.848	0.999
flgH	flgI	7102394	7102393	529507.PMI1648	529507.PMI1647	0.866	0	0.778	0	0.839	0.24	0	0.834	0.999
flgB	flgD	7102400	7102398	529507.PMI1654	529507.PMI1652	0.872	0	0.765	0	0.871	0.176	0	0.833	0.999
flgI	flgJ	7102393	7102392	529507.PMI1647	529507.PMI1646	0.916	0	0.734	0	0.826	0	0	0.701	0.998
flgD	flgG	7102398	7102395	529507.PMI1652	529507.PMI1649	0.751	0	0.721	0	0.902	0.126	0	0.752	0.998
flgH	flgJ	7102394	7102392	529507.PMI1648	529507.PMI1646	0.892	0	0.767	0	0.842	0	0	0.65	0.998
flgC	flgG	7102399	7102395	529507.PMI1653	529507.PMI1649	0.737	0	0.778	0	0.811	0.172	0	0.833	0.998
flgG	flgI	7102395	7102393	529507.PMI1649	529507.PMI1647	0.739	0	0.778	0	0.831	0	0	0.758	0.997
flgD	flgH	7102398	7102394	529507.PMI1652	529507.PMI1648	0.658	0	0.776	0	0.828	0	0	0.799	0.997
flgG	flgH	7102395	7102394	529507.PMI1649	529507.PMI1648	0.758	0	0.757	0	0.845	0	0	0.752	0.997
flgB	flgG	7102400	7102395	529507.PMI1654	529507.PMI1649	0.737	0	0.75	0	0.811	0	0	0.813	0.997
flgC	flgD	7102399	7102398	529507.PMI1653	529507.PMI1652	0.872	0	0.596	0	0.762	0.226	0	0.78	0.997
flgC	flgE	7102399	7102397	529507.PMI1653	529507.PMI1651	0.806	0	0.777	0	0.661	0	0	0.788	0.996
flgE	flgF	7102397	7102396	529507.PMI1651	529507.PMI1650	0.844	0	0.778	0	0.583	0	0	0.788	0.996
flgD	flgI	7102398	7102393	529507.PMI1652	529507.PMI1647	0.645	0	0.756	0	0.815	0	0	0.752	0.995
flgB	flgE	7102400	7102397	529507.PMI1654	529507.PMI1651	0.806	0	0.724	0	0.661	0	0	0.804	0.995
flgB	flgF	7102400	7102396	529507.PMI1654	529507.PMI1650	0.769	0	0.777	0	0.591	0	0	0.765	0.994
flgD	flgF	7102398	7102396	529507.PMI1652	529507.PMI1650	0.78	0	0.773	0	0.586	0	0	0.752	0.994
flgF	flgH	7102396	7102394	529507.PMI1650	529507.PMI1648	0.727	0	0.778	0	0.585	0.215	0	0.752	0.994
flgC	flgF	7102399	7102396	529507.PMI1653	529507.PMI1650	0.769	0	0.778	0	0.58	0	0	0.766	0.994
flgH	flgK	7102394	7102391	529507.PMI1648	529507.PMI1645	0.68	0	0.767	0	0.577	0.215	0	0.772	0.993
flgF	flgJ	7102396	7102392	529507.PMI1650	529507.PMI1646	0.767	0	0.751	0	0.711	0	0	0.643	0.993
flgD	flgK	7102398	7102391	529507.PMI1652	529507.PMI1645	0.561	0	0.732	0	0.726	0	0	0.814	0.993
flgI	flgK	7102393	7102391	529507.PMI1647	529507.PMI1645	0.695	0	0.741	0	0.588	0	0	0.814	0.993
flgG	flgK	7102395	7102391	529507.PMI1649	529507.PMI1645	0.612	0	0.757	0	0.664	0	0	0.777	0.992
flgE	flgK	7102397	7102391	529507.PMI1651	529507.PMI1645	0.581	0	0.768	0	0.611	0	0	0.834	0.992
flgE	flgH	7102397	7102394	529507.PMI1651	529507.PMI1648	0.696	0	0.753	0	0.631	0	0	0.765	0.992
flgB	flgH	7102400	7102394	529507.PMI1654	529507.PMI1648	0.649	0	0.764	0	0.661	0	0	0.779	0.992
flgE	flgI	7102397	7102393	529507.PMI1651	529507.PMI1647	0.681	0	0.715	0	0.61	0	0	0.778	0.991
flgB	flgI	7102400	7102393	529507.PMI1654	529507.PMI1647	0.637	0	0.713	0	0.685	0	0	0.761	0.991
flgF	flgI	7102396	7102393	529507.PMI1650	529507.PMI1647	0.709	0	0.775	0	0.504	0	0	0.764	0.991
flgD	flgJ	7102398	7102392	529507.PMI1652	529507.PMI1646	0.712	0	0.749	0	0.784	0	0	0.485	0.99
flgG	flgJ	7102395	7102392	529507.PMI1649	529507.PMI1646	0.789	0	0.353	0	0.83	0	0	0.651	0.99
flgE	flgG	7102397	7102395	529507.PMI1651	529507.PMI1649	0.804	0.704	0.778	0.647	0.687	0	0	0.772	0.989
flgC	flgI	7102399	7102393	529507.PMI1653	529507.PMI1647	0.637	0	0.745	0	0.56	0	0	0.752	0.988
flgJ	flgK	7102392	7102391	529507.PMI1646	529507.PMI1645	0.755	0	0.709	0	0.661	0	0	0.58	0.988
flgB	flgJ	7102400	7102392	529507.PMI1654	529507.PMI1646	0.704	0	0.727	0	0.662	0	0	0.632	0.988
flgC	flgK	7102399	7102391	529507.PMI1653	529507.PMI1645	0.556	0	0.776	0	0.567	0	0	0.761	0.988
flgB	flgK	7102400	7102391	529507.PMI1654	529507.PMI1645	0.556	0	0.754	0	0.568	0	0	0.76	0.987
flgH	fliF	7102394	7102376	529507.PMI1648	529507.PMI1630	0.381	0	0.774	0	0.504	0	0	0.834	0.986
flgC	flgH	7102399	7102394	529507.PMI1653	529507.PMI1648	0.649	0	0.64	0	0.589	0	0	0.752	0.985
flgI	fliF	7102393	7102376	529507.PMI1647	529507.PMI1630	0.381	0	0.777	0	0.527	0	0	0.789	0.984
flgC	fliF	7102399	7102376	529507.PMI1653	529507.PMI1630	0.381	0	0.778	0	0.508	0	0	0.797	0.984
flgG	fliF	7102395	7102376	529507.PMI1649	529507.PMI1630	0.381	0	0.777	0	0.571	0	0	0.76	0.983
flgB	fliF	7102400	7102376	529507.PMI1654	529507.PMI1630	0.381	0	0.768	0	0.511	0	0	0.788	0.983
flgF	flgK	7102396	7102391	529507.PMI1650	529507.PMI1645	0.597	0	0.777	0	0.289	0	0	0.761	0.982
flgE	fliF	7102397	7102376	529507.PMI1651	529507.PMI1630	0.381	0	0.765	0	0.481	0	0	0.799	0.982
flgE	flgJ	7102397	7102392	529507.PMI1651	529507.PMI1646	0.743	0	0.48	0	0.661	0	0	0.616	0.98
flgJ	fliF	7102392	7102376	529507.PMI1646	529507.PMI1630	0.06	0	0.675	0	0.83	0	0	0.571	0.974
flgF	fliF	7102396	7102376	529507.PMI1650	529507.PMI1630	0.05	0	0.777	0	0.484	0	0	0.778	0.972
flgD	fliF	7102398	7102376	529507.PMI1652	529507.PMI1630	0.381	0	0.652	0	0.5	0	0	0.766	0.971
flgK	fliF	7102391	7102376	529507.PMI1645	529507.PMI1630	0.341	0	0.777	0	0.252	0	0	0.752	0.969
flgF	flgG	7102396	7102395	529507.PMI1650	529507.PMI1649	0.85	0	0.778	0.669	0.61	0	0	0.834	0.967
flgC	flgJ	7102399	7102392	529507.PMI1653	529507.PMI1646	0.704	0	0.32	0	0.673	0	0	0.57	0.967
flgH	flgI	7102394	7102393	529507.PMI1648	529507.PMI1647	0.866	0	0.778	0	0.839	0.24	0	0.834	0.999
flgB	flgD	7102400	7102398	529507.PMI1654	529507.PMI1652	0.872	0	0.765	0	0.871	0.176	0	0.833	0.999
flgB	flgC	7102400	7102399	529507.PMI1654	529507.PMI1653	0.89	0	0.756	0	0.844	0	0	0.848	0.999
flgD	flgE	7102398	7102397	529507.PMI1652	529507.PMI1651	0.824	0.704	0.712	0	0.813	0.176	0	0.842	0.999
flgD	flgG	7102398	7102395	529507.PMI1652	529507.PMI1649	0.751	0	0.721	0	0.902	0.126	0	0.752	0.998
flgC	flgG	7102399	7102395	529507.PMI1653	529507.PMI1649	0.737	0	0.778	0	0.811	0.172	0	0.833	0.998
flgD	fliK	7102398	7102381	529507.PMI1652	529507.PMI1635	0.381	0	0.705	0	0.509	0.931	0	0.764	0.998
flgG	flgH	7102395	7102394	529507.PMI1649	529507.PMI1648	0.758	0	0.757	0	0.845	0	0	0.752	0.997
flgD	flgH	7102398	7102394	529507.PMI1652	529507.PMI1648	0.658	0	0.776	0	0.828	0	0	0.799	0.997
flgK	flgL	7102391	7102390	529507.PMI1645	529507.PMI1644	0.847	0	0.777	0	0.661	0	0	0.845	0.997
flgC	flgD	7102399	7102398	529507.PMI1653	529507.PMI1652	0.872	0	0.596	0	0.762	0.226	0	0.78	0.997
flgG	flgI	7102395	7102393	529507.PMI1649	529507.PMI1647	0.739	0	0.778	0	0.831	0	0	0.758	0.997
flgB	flgG	7102400	7102395	529507.PMI1654	529507.PMI1649	0.737	0	0.75	0	0.811	0	0	0.813	0.997
flgE	flgF	7102397	7102396	529507.PMI1651	529507.PMI1650	0.844	0	0.778	0	0.583	0	0	0.788	0.996
flgE	fliK	7102397	7102381	529507.PMI1651	529507.PMI1635	0.155	0	0.456	0	0.502	0.931	0	0.816	0.996
flgC	flgE	7102399	7102397	529507.PMI1653	529507.PMI1651	0.806	0	0.777	0	0.661	0	0	0.788	0.996
flgD	flgI	7102398	7102393	529507.PMI1652	529507.PMI1647	0.645	0	0.756	0	0.815	0	0	0.752	0.995
flgB	flgE	7102400	7102397	529507.PMI1654	529507.PMI1651	0.806	0	0.724	0	0.661	0	0	0.804	0.995
flgC	flgF	7102399	7102396	529507.PMI1653	529507.PMI1650	0.769	0	0.778	0	0.58	0	0	0.766	0.994
flgF	flgH	7102396	7102394	529507.PMI1650	529507.PMI1648	0.727	0	0.778	0	0.585	0.215	0	0.752	0.994
flgD	flgF	7102398	7102396	529507.PMI1652	529507.PMI1650	0.78	0	0.773	0	0.586	0	0	0.752	0.994
flgB	flgF	7102400	7102396	529507.PMI1654	529507.PMI1650	0.769	0	0.777	0	0.591	0	0	0.765	0.994
flgD	flgK	7102398	7102391	529507.PMI1652	529507.PMI1645	0.561	0	0.732	0	0.726	0	0	0.814	0.993
flgI	flgK	7102393	7102391	529507.PMI1647	529507.PMI1645	0.695	0	0.741	0	0.588	0	0	0.814	0.993
flgH	flgK	7102394	7102391	529507.PMI1648	529507.PMI1645	0.68	0	0.767	0	0.577	0.215	0	0.772	0.993
flgB	flgH	7102400	7102394	529507.PMI1654	529507.PMI1648	0.649	0	0.764	0	0.661	0	0	0.779	0.992
flgG	flgK	7102395	7102391	529507.PMI1649	529507.PMI1645	0.612	0	0.757	0	0.664	0	0	0.777	0.992
flgE	flgK	7102397	7102391	529507.PMI1651	529507.PMI1645	0.581	0	0.768	0	0.611	0	0	0.834	0.992
flgE	flgH	7102397	7102394	529507.PMI1651	529507.PMI1648	0.696	0	0.753	0	0.631	0	0	0.765	0.992
flgB	flgI	7102400	7102393	529507.PMI1654	529507.PMI1647	0.637	0	0.713	0	0.685	0	0	0.761	0.991
flgF	flgI	7102396	7102393	529507.PMI1650	529507.PMI1647	0.709	0	0.775	0	0.504	0	0	0.764	0.991
flgE	flgI	7102397	7102393	529507.PMI1651	529507.PMI1647	0.681	0	0.715	0	0.61	0	0	0.778	0.991
flgE	flgG	7102397	7102395	529507.PMI1651	529507.PMI1649	0.804	0.704	0.778	0.647	0.687	0	0	0.772	0.989
flgC	flgI	7102399	7102393	529507.PMI1653	529507.PMI1647	0.637	0	0.745	0	0.56	0	0	0.752	0.988
flgC	flgK	7102399	7102391	529507.PMI1653	529507.PMI1645	0.556	0	0.776	0	0.567	0	0	0.761	0.988
flgE	flgL	7102397	7102390	529507.PMI1651	529507.PMI1644	0.575	0	0.754	0	0.452	0	0	0.814	0.987
flgB	flgK	7102400	7102391	529507.PMI1654	529507.PMI1645	0.556	0	0.754	0	0.568	0	0	0.76	0.987
flgB	flgL	7102400	7102390	529507.PMI1654	529507.PMI1644	0.552	0	0.749	0	0.367	0.131	0	0.833	0.987
flgD	flgL	7102398	7102390	529507.PMI1652	529507.PMI1644	0.556	0	0.632	0	0.477	0.17	0	0.827	0.985
flgC	flgL	7102399	7102390	529507.PMI1653	529507.PMI1644	0.552	0	0.759	0	0.436	0	0	0.789	0.985
flgC	flgH	7102399	7102394	529507.PMI1653	529507.PMI1648	0.649	0	0.64	0	0.589	0	0	0.752	0.985
flgF	flgK	7102396	7102391	529507.PMI1650	529507.PMI1645	0.597	0	0.777	0	0.289	0	0	0.761	0.982
flgH	flgL	7102394	7102390	529507.PMI1648	529507.PMI1644	0.667	0	0.674	0	0.285	0.215	0	0.739	0.981
flgF	flgL	7102396	7102390	529507.PMI1650	529507.PMI1644	0.59	0	0.776	0	0.252	0	0	0.744	0.98
flgG	flgL	7102395	7102390	529507.PMI1649	529507.PMI1644	0.604	0	0.604	0	0.48	0.124	0	0.738	0.977
flgH	fliK	7102394	7102381	529507.PMI1648	529507.PMI1635	0.047	0	0.75	0	0.482	0	0	0.812	0.973
flgF	flgG	7102396	7102395	529507.PMI1650	529507.PMI1649	0.85	0	0.778	0.669	0.61	0	0	0.834	0.967
flgI	flgL	7102393	7102390	529507.PMI1647	529507.PMI1644	0.68	0	0.371	0	0.195	0	0	0.804	0.964
flgB	fliK	7102400	7102381	529507.PMI1654	529507.PMI1635	0.299	0	0.614	0	0.461	0	0	0.754	0.959
flgK	fliK	7102391	7102381	529507.PMI1645	529507.PMI1635	0.046	0	0.69	0	0.231	0	0	0.796	0.947
flgF	fliK	7102396	7102381	529507.PMI1650	529507.PMI1635	0.047	0	0.573	0	0.459	0	0	0.715	0.928
flgI	fliK	7102393	7102381	529507.PMI1647	529507.PMI1635	0.047	0	0.598	0	0.261	0	0	0.76	0.923
flgL	fliK	7102390	7102381	529507.PMI1644	529507.PMI1635	0.047	0	0.533	0	0.339	0	0	0.741	0.913
flgC	fliK	7102399	7102381	529507.PMI1653	529507.PMI1635	0.301	0	0.182	0	0.497	0	0	0.7	0.902
flgG	fliK	7102395	7102381	529507.PMI1649	529507.PMI1635	0.064	0	0.194	0	0.584	0	0	0.719	0.9
flgD	flgE	7102398	7102397	529507.PMI1652	529507.PMI1651	0.824	0.704	0.712	0	0.813	0.176	0	0.842	0.999
flgB	flgD	7102400	7102398	529507.PMI1654	529507.PMI1652	0.872	0	0.765	0	0.871	0.176	0	0.833	0.999
flgB	flgC	7102400	7102399	529507.PMI1654	529507.PMI1653	0.89	0	0.756	0	0.844	0	0	0.848	0.999
flgH	flgI	7102394	7102393	529507.PMI1648	529507.PMI1647	0.866	0	0.778	0	0.839	0.24	0	0.834	0.999
flgD	flgG	7102398	7102395	529507.PMI1652	529507.PMI1649	0.751	0	0.721	0	0.902	0.126	0	0.752	0.998
flgH	flgJ	7102394	7102392	529507.PMI1648	529507.PMI1646	0.892	0	0.767	0	0.842	0	0	0.65	0.998
flgI	flgJ	7102393	7102392	529507.PMI1647	529507.PMI1646	0.916	0	0.734	0	0.826	0	0	0.701	0.998
flgC	flgG	7102399	7102395	529507.PMI1653	529507.PMI1649	0.737	0	0.778	0	0.811	0.172	0	0.833	0.998
flgC	flgD	7102399	7102398	529507.PMI1653	529507.PMI1652	0.872	0	0.596	0	0.762	0.226	0	0.78	0.997
flgG	flgH	7102395	7102394	529507.PMI1649	529507.PMI1648	0.758	0	0.757	0	0.845	0	0	0.752	0.997
flgB	flgG	7102400	7102395	529507.PMI1654	529507.PMI1649	0.737	0	0.75	0	0.811	0	0	0.813	0.997
flgG	flgI	7102395	7102393	529507.PMI1649	529507.PMI1647	0.739	0	0.778	0	0.831	0	0	0.758	0.997
flgK	flgL	7102391	7102390	529507.PMI1645	529507.PMI1644	0.847	0	0.777	0	0.661	0	0	0.845	0.997
flgD	flgH	7102398	7102394	529507.PMI1652	529507.PMI1648	0.658	0	0.776	0	0.828	0	0	0.799	0.997
flgC	flgE	7102399	7102397	529507.PMI1653	529507.PMI1651	0.806	0	0.777	0	0.661	0	0	0.788	0.996
flgE	flgF	7102397	7102396	529507.PMI1651	529507.PMI1650	0.844	0	0.778	0	0.583	0	0	0.788	0.996
flgB	flgE	7102400	7102397	529507.PMI1654	529507.PMI1651	0.806	0	0.724	0	0.661	0	0	0.804	0.995
flgD	flgI	7102398	7102393	529507.PMI1652	529507.PMI1647	0.645	0	0.756	0	0.815	0	0	0.752	0.995
flgD	flgF	7102398	7102396	529507.PMI1652	529507.PMI1650	0.78	0	0.773	0	0.586	0	0	0.752	0.994
flgC	flgF	7102399	7102396	529507.PMI1653	529507.PMI1650	0.769	0	0.778	0	0.58	0	0	0.766	0.994
flgF	flgH	7102396	7102394	529507.PMI1650	529507.PMI1648	0.727	0	0.778	0	0.585	0.215	0	0.752	0.994
flgB	flgF	7102400	7102396	529507.PMI1654	529507.PMI1650	0.769	0	0.777	0	0.591	0	0	0.765	0.994
flgI	flgK	7102393	7102391	529507.PMI1647	529507.PMI1645	0.695	0	0.741	0	0.588	0	0	0.814	0.993
flgF	flgJ	7102396	7102392	529507.PMI1650	529507.PMI1646	0.767	0	0.751	0	0.711	0	0	0.643	0.993
flgH	flgK	7102394	7102391	529507.PMI1648	529507.PMI1645	0.68	0	0.767	0	0.577	0.215	0	0.772	0.993
flgD	flgK	7102398	7102391	529507.PMI1652	529507.PMI1645	0.561	0	0.732	0	0.726	0	0	0.814	0.993
flgG	flgK	7102395	7102391	529507.PMI1649	529507.PMI1645	0.612	0	0.757	0	0.664	0	0	0.777	0.992
flgE	flgK	7102397	7102391	529507.PMI1651	529507.PMI1645	0.581	0	0.768	0	0.611	0	0	0.834	0.992
flgE	flgH	7102397	7102394	529507.PMI1651	529507.PMI1648	0.696	0	0.753	0	0.631	0	0	0.765	0.992
flgB	flgH	7102400	7102394	529507.PMI1654	529507.PMI1648	0.649	0	0.764	0	0.661	0	0	0.779	0.992
flgF	flgI	7102396	7102393	529507.PMI1650	529507.PMI1647	0.709	0	0.775	0	0.504	0	0	0.764	0.991
flgB	flgI	7102400	7102393	529507.PMI1654	529507.PMI1647	0.637	0	0.713	0	0.685	0	0	0.761	0.991
flgE	flgI	7102397	7102393	529507.PMI1651	529507.PMI1647	0.681	0	0.715	0	0.61	0	0	0.778	0.991
flgD	flgJ	7102398	7102392	529507.PMI1652	529507.PMI1646	0.712	0	0.749	0	0.784	0	0	0.485	0.99
flgG	flgJ	7102395	7102392	529507.PMI1649	529507.PMI1646	0.789	0	0.353	0	0.83	0	0	0.651	0.99
flgE	flgG	7102397	7102395	529507.PMI1651	529507.PMI1649	0.804	0.704	0.778	0.647	0.687	0	0	0.772	0.989
flgC	flgK	7102399	7102391	529507.PMI1653	529507.PMI1645	0.556	0	0.776	0	0.567	0	0	0.761	0.988
flgJ	flgK	7102392	7102391	529507.PMI1646	529507.PMI1645	0.755	0	0.709	0	0.661	0	0	0.58	0.988
flgB	flgJ	7102400	7102392	529507.PMI1654	529507.PMI1646	0.704	0	0.727	0	0.662	0	0	0.632	0.988
flgC	flgI	7102399	7102393	529507.PMI1653	529507.PMI1647	0.637	0	0.745	0	0.56	0	0	0.752	0.988
flgB	flgK	7102400	7102391	529507.PMI1654	529507.PMI1645	0.556	0	0.754	0	0.568	0	0	0.76	0.987
flgB	flgL	7102400	7102390	529507.PMI1654	529507.PMI1644	0.552	0	0.749	0	0.367	0.131	0	0.833	0.987
flgE	flgL	7102397	7102390	529507.PMI1651	529507.PMI1644	0.575	0	0.754	0	0.452	0	0	0.814	0.987
flgD	flgL	7102398	7102390	529507.PMI1652	529507.PMI1644	0.556	0	0.632	0	0.477	0.17	0	0.827	0.985
flgC	flgH	7102399	7102394	529507.PMI1653	529507.PMI1648	0.649	0	0.64	0	0.589	0	0	0.752	0.985
flgC	flgL	7102399	7102390	529507.PMI1653	529507.PMI1644	0.552	0	0.759	0	0.436	0	0	0.789	0.985
flgF	flgK	7102396	7102391	529507.PMI1650	529507.PMI1645	0.597	0	0.777	0	0.289	0	0	0.761	0.982
flgH	flgL	7102394	7102390	529507.PMI1648	529507.PMI1644	0.667	0	0.674	0	0.285	0.215	0	0.739	0.981
flgF	flgL	7102396	7102390	529507.PMI1650	529507.PMI1644	0.59	0	0.776	0	0.252	0	0	0.744	0.98
flgE	flgJ	7102397	7102392	529507.PMI1651	529507.PMI1646	0.743	0	0.48	0	0.661	0	0	0.616	0.98
flgG	flgL	7102395	7102390	529507.PMI1649	529507.PMI1644	0.604	0	0.604	0	0.48	0.124	0	0.738	0.977
flgF	flgG	7102396	7102395	529507.PMI1650	529507.PMI1649	0.85	0	0.778	0.669	0.61	0	0	0.834	0.967
flgC	flgJ	7102399	7102392	529507.PMI1653	529507.PMI1646	0.704	0	0.32	0	0.673	0	0	0.57	0.967
flgI	flgL	7102393	7102390	529507.PMI1647	529507.PMI1644	0.68	0	0.371	0	0.195	0	0	0.804	0.964
flgJ	flgL	7102392	7102390	529507.PMI1646	529507.PMI1644	0.732	0	0.573	0	0.421	0	0	0.475	0.96
fliT	fliD	7102369	7102367	529507.PMI1623	529507.PMI1621	0.726	0	0.559	0	0.491	0.935	0	0.777	0.998
flgK	flgL	7102391	7102390	529507.PMI1645	529507.PMI1644	0.847	0	0.777	0	0.661	0	0	0.845	0.997
flgN	flgK	7102403	7102391	529507.PMI1657	529507.PMI1645	0.054	0	0.565	0	0.561	0.937	0	0.773	0.996
fliD	fliC1	7102367	7102366	529507.PMI1621	529507.PMI1620	0.501	0	0.763	0	0.6	0.13	0	0.834	0.991
flgN	flgL	7102403	7102390	529507.PMI1657	529507.PMI1644	0	0	0.511	0	0.482	0.937	0	0.555	0.991
flgL	fliD	7102390	7102367	529507.PMI1644	529507.PMI1621	0.377	0	0.76	0	0.598	0.17	0	0.833	0.99
flgN	flgM	7102403	7102402	529507.PMI1657	529507.PMI1656	0.847	0	0.778	0	0.661	0	0	0.138	0.988
flgK	fliD	7102391	7102367	529507.PMI1645	529507.PMI1621	0.381	0	0.735	0	0.57	0	0	0.84	0.987
flgN	fliJ	7102403	7102380	529507.PMI1657	529507.PMI1634	0	0	0.747	0	0.132	0.931	0	0.123	0.984
fliJ	fliT	7102380	7102369	529507.PMI1634	529507.PMI1623	0	0	0.707	0	0.124	0.933	0	0.069	0.981
flgK	fliC1	7102391	7102366	529507.PMI1645	529507.PMI1620	0.381	0	0.724	0	0.518	0	0	0.789	0.98
flgA	flgK	7102401	7102391	529507.PMI1655	529507.PMI1645	0.503	0	0.744	0	0.468	0	0	0.701	0.977
flgL	fliC1	7102390	7102366	529507.PMI1644	529507.PMI1620	0.381	0	0.689	0	0.478	0	0	0.737	0.97
fliL	fliJ	7102382	7102380	529507.PMI1636	529507.PMI1634	0.66	0	0.778	0	0.565	0	0	0.078	0.965
flgN	flgA	7102403	7102401	529507.PMI1657	529507.PMI1655	0.381	0	0.754	0	0.452	0	0	0.412	0.944
fliT	fliC1	7102369	7102366	529507.PMI1623	529507.PMI1620	0.219	0	0	0	0.205	0.862	0	0.419	0.943
flgN	fliT	7102403	7102369	529507.PMI1657	529507.PMI1623	0	0	0.761	0	0.289	0	0	0.595	0.925
flgM	flgA	7102402	7102401	529507.PMI1656	529507.PMI1655	0.381	0	0.715	0	0.492	0	0	0.205	0.919
flgM	fliZ	7102402	7102363	529507.PMI1656	529507.PMI1617	0	0	0.777	0	0.517	0	0	0.3	0.918
flgM	fliT	7102402	7102369	529507.PMI1656	529507.PMI1623	0	0	0.775	0	0.283	0.2	0	0.417	0.914
fliT	fliZ	7102369	7102363	529507.PMI1623	529507.PMI1617	0	0	0.778	0	0.353	0	0	0.42	0.909
flgA	flgL	7102401	7102390	529507.PMI1655	529507.PMI1644	0.498	0	0.624	0	0.447	0	0	0.225	0.908
fliD	fliZ	7102367	7102363	529507.PMI1621	529507.PMI1617	0	0	0.705	0	0.566	0	0	0.323	0.905
flgA	fliL	7102401	7102382	529507.PMI1655	529507.PMI1636	0.067	0	0.778	0	0.523	0.119	0	0.064	0.903
flgA	fliJ	7102401	7102380	529507.PMI1655	529507.PMI1634	0	0	0.777	0	0.256	0	0	0.456	0.901
flgK	fliJ	7102391	7102380	529507.PMI1645	529507.PMI1634	0	0	0.733	0	0.13	0	0	0.6	0.898
flgN	fliD	7102403	7102367	529507.PMI1657	529507.PMI1621	0	0	0.575	0	0.485	0	0	0.501	0.881
flgN	fliZ	7102403	7102363	529507.PMI1657	529507.PMI1617	0	0	0.716	0	0.567	0	0	0.093	0.878
flgA	fliD	7102401	7102367	529507.PMI1655	529507.PMI1621	0.059	0	0.702	0	0.428	0	0	0.325	0.877
flgL	fliT	7102390	7102369	529507.PMI1644	529507.PMI1623	0	0	0.367	0	0.436	0.586	0	0.264	0.876
fliL	fliD	7102382	7102367	529507.PMI1636	529507.PMI1621	0.088	0	0.694	0	0.465	0	0	0.258	0.874
flgN	fliL	7102403	7102382	529507.PMI1657	529507.PMI1636	0	0	0.748	0	0.411	0	0	0.184	0.868
flgM	flgK	7102402	7102391	529507.PMI1656	529507.PMI1645	0.381	0	0.494	0	0.515	0	0	0.15	0.853
flgM	fliD	7102402	7102367	529507.PMI1656	529507.PMI1621	0.058	0	0.645	0	0.51	0	0	0.176	0.846
flgK	fliL	7102391	7102382	529507.PMI1645	529507.PMI1636	0.066	0	0.679	0	0.349	0	0	0.257	0.835
flgM	fliL	7102402	7102382	529507.PMI1656	529507.PMI1636	0	0	0.716	0	0.38	0	0	0.123	0.832
flgN	fliC1	7102403	7102366	529507.PMI1657	529507.PMI1620	0	0	0	0	0.381	0.652	0	0.243	0.822
flgL	fliZ	7102390	7102363	529507.PMI1644	529507.PMI1617	0	0	0.589	0	0.564	0	0	0.073	0.819
flgK	fliZ	7102391	7102363	529507.PMI1645	529507.PMI1617	0	0	0.27	0	0.568	0.237	0	0.225	0.788
flgM	flgL	7102402	7102390	529507.PMI1656	529507.PMI1644	0.094	0	0.509	0	0.488	0	0	0.146	0.779
flgK	fliT	7102391	7102369	529507.PMI1645	529507.PMI1623	0	0	0.434	0	0.379	0	0	0.423	0.779
fliJ	fliD	7102380	7102367	529507.PMI1634	529507.PMI1621	0.062	0	0.702	0	0.188	0	0	0.117	0.772
flgM	fliJ	7102402	7102380	529507.PMI1656	529507.PMI1634	0	0	0.712	0	0.149	0	0	0.061	0.749
flgA	fliT	7102401	7102369	529507.PMI1655	529507.PMI1623	0	0	0.65	0	0.243	0	0	0.075	0.733
flgL	fliJ	7102390	7102380	529507.PMI1644	529507.PMI1634	0.042	0	0.582	0	0.135	0.17	0	0.128	0.703
flgA	fliZ	7102401	7102363	529507.PMI1655	529507.PMI1617	0	0	0.394	0	0.494	0	0	0.075	0.691
fliL	fliT	7102382	7102369	529507.PMI1636	529507.PMI1623	0	0	0.594	0	0.201	0	0	0.063	0.669
flgM	fliC1	7102402	7102366	529507.PMI1656	529507.PMI1620	0.094	0	0	0	0.388	0	0	0.418	0.649
fliL	fliZ	7102382	7102363	529507.PMI1636	529507.PMI1617	0	0	0.295	0	0.489	0	0	0.094	0.645
flgL	fliL	7102390	7102382	529507.PMI1644	529507.PMI1636	0.052	0	0.487	0	0.256	0	0	0.129	0.642
fliJ	fliZ	7102380	7102363	529507.PMI1634	529507.PMI1617	0	0	0.528	0	0.26	0	0	0	0.635
fliC1	fliZ	7102366	7102363	529507.PMI1620	529507.PMI1617	0.044	0	0	0	0.511	0	0	0.143	0.564
fliL	fliC1	7102382	7102366	529507.PMI1636	529507.PMI1620	0.052	0	0.168	0	0.133	0	0	0.412	0.544
flgA	fliC1	7102401	7102366	529507.PMI1655	529507.PMI1620	0.371	0	0	0	0.198	0	0	0.156	0.537
fliJ	fliC1	7102380	7102366	529507.PMI1634	529507.PMI1620	0.042	0	0.223	0	0.103	0.17	0	0.148	0.441
fliG	fliF	7102377	7102376	529507.PMI1631	529507.PMI1630	0.89	0	0.777	0	0.697	0.942	0	0.916	0.999
flhB	flhA	7102406	7102405	529507.PMI1660	529507.PMI1659	0.902	0	0.778	0	0.346	0.931	0	0.797	0.999
fliN	fliG	7102384	7102377	529507.PMI1638	529507.PMI1631	0.626	0	0.778	0	0.67	0.187	0.8	0.862	0.999
fliI	fliG	7102379	7102377	529507.PMI1633	529507.PMI1631	0.902	0	0.777	0	0.594	0.206	0	0.833	0.998
flhA	fliI	7102405	7102379	529507.PMI1659	529507.PMI1633	0.381	0	0.778	0	0.385	0.931	0	0.765	0.998
fliN	fliH	7102384	7102378	529507.PMI1638	529507.PMI1632	0.626	0	0	0	0.589	0.931	0	0.788	0.997
fliI	fliF	7102379	7102376	529507.PMI1633	529507.PMI1630	0.902	0	0.771	0	0.586	0	0	0.784	0.997
fliP	fliN	7102386	7102384	529507.PMI1640	529507.PMI1638	0.89	0	0.778	0	0.484	0	0	0.834	0.997
fliJ	fliI	7102380	7102379	529507.PMI1634	529507.PMI1633	0.831	0	0.159	0	0.518	0.931	0	0.632	0.997
fliQ	fliP	7102387	7102386	529507.PMI1641	529507.PMI1640	0.866	0	0.773	0	0.486	0	0	0.834	0.997
fliQ	fliN	7102387	7102384	529507.PMI1641	529507.PMI1638	0.866	0	0.777	0	0.347	0	0	0.841	0.996
fliI	fliH	7102379	7102378	529507.PMI1633	529507.PMI1632	0.902	0	0.302	0	0.661	0.546	0	0.736	0.996
fliN	fliI	7102384	7102379	529507.PMI1638	529507.PMI1633	0.639	0	0.778	0	0.582	0.522	0	0.752	0.995
fliH	fliF	7102378	7102376	529507.PMI1632	529507.PMI1630	0.89	0	0.623	0	0.584	0	0	0.747	0.995
fliH	fliG	7102378	7102377	529507.PMI1632	529507.PMI1631	0.89	0	0.499	0	0.677	0.172	0	0.745	0.995
flhA	fliH	7102405	7102378	529507.PMI1659	529507.PMI1632	0.381	0	0.232	0	0.347	0.931	0	0.783	0.994
fliN	fliF	7102384	7102376	529507.PMI1638	529507.PMI1630	0.626	0	0.768	0	0.594	0	0	0.834	0.993
fliP	fliF	7102386	7102376	529507.PMI1640	529507.PMI1630	0.626	0	0.767	0	0.482	0	0	0.787	0.989
fliP	fliI	7102386	7102379	529507.PMI1640	529507.PMI1633	0.639	0	0.778	0	0.509	0	0	0.752	0.988
fliJ	fliH	7102380	7102378	529507.PMI1634	529507.PMI1632	0.819	0	0.778	0	0.544	0	0	0.452	0.988
fliP	fliG	7102386	7102377	529507.PMI1640	529507.PMI1631	0.626	0	0.778	0	0.479	0	0	0.752	0.987
fliQ	fliG	7102387	7102377	529507.PMI1641	529507.PMI1631	0.616	0	0.772	0	0.367	0	0	0.786	0.986
flhB	fliN	7102406	7102384	529507.PMI1660	529507.PMI1638	0.381	0	0.777	0	0.459	0	0	0.834	0.986
flhA	fliF	7102405	7102376	529507.PMI1659	529507.PMI1630	0.381	0	0.776	0	0.498	0	0	0.816	0.985
flhB	fliG	7102406	7102377	529507.PMI1660	529507.PMI1631	0.381	0	0.776	0	0.45	0.171	0	0.788	0.984
flgI	fliF	7102393	7102376	529507.PMI1647	529507.PMI1630	0.381	0	0.777	0	0.527	0	0	0.789	0.984
fliQ	fliI	7102387	7102379	529507.PMI1641	529507.PMI1633	0.629	0	0.764	0	0.278	0	0	0.787	0.984
fliJ	fliF	7102380	7102376	529507.PMI1634	529507.PMI1630	0.819	0	0.561	0	0.553	0	0	0.562	0.982
fliQ	fliF	7102387	7102376	529507.PMI1641	529507.PMI1630	0.616	0	0.731	0	0.279	0	0	0.789	0.982
flgI	fliG	7102393	7102377	529507.PMI1647	529507.PMI1631	0.381	0	0.758	0	0.512	0	0	0.779	0.981
flhB	fliP	7102406	7102386	529507.PMI1660	529507.PMI1640	0.381	0	0.778	0	0.391	0	0	0.788	0.979
flhB	fliQ	7102406	7102387	529507.PMI1660	529507.PMI1641	0.381	0	0.747	0	0.263	0	0	0.841	0.979
flhA	flgI	7102405	7102393	529507.PMI1659	529507.PMI1647	0.381	0	0.668	0	0.459	0	0	0.834	0.979
flhA	fliG	7102405	7102377	529507.PMI1659	529507.PMI1631	0.381	0	0.777	0	0.369	0	0	0.785	0.978
flhA	fliJ	7102405	7102380	529507.PMI1659	529507.PMI1634	0.269	0	0	0	0.124	0.931	0	0.574	0.978
flhB	fliF	7102406	7102376	529507.PMI1660	529507.PMI1630	0.381	0	0.759	0	0.469	0	0	0.761	0.978
flhA	fliN	7102405	7102384	529507.PMI1659	529507.PMI1638	0.381	0	0.778	0	0.27	0	0	0.804	0.977
flhA	fliQ	7102405	7102387	529507.PMI1659	529507.PMI1641	0.381	0	0.766	0	0.167	0	0	0.835	0.977
flhA	fliP	7102405	7102386	529507.PMI1659	529507.PMI1640	0.381	0	0.778	0	0.386	0	0	0.765	0.977
fliJ	fliG	7102380	7102377	529507.PMI1634	529507.PMI1631	0.819	0	0.374	0	0.565	0	0	0.558	0.975
flhB	fliI	7102406	7102379	529507.PMI1660	529507.PMI1633	0.381	0	0.778	0	0.348	0	0	0.752	0.974
flgI	fliN	7102393	7102384	529507.PMI1647	529507.PMI1638	0.381	0	0.513	0	0.491	0	0	0.787	0.963
flgI	fliI	7102393	7102379	529507.PMI1647	529507.PMI1633	0.381	0	0.539	0	0.518	0	0	0.752	0.961
flhB	flgI	7102406	7102393	529507.PMI1660	529507.PMI1647	0.381	0	0.561	0	0.477	0	0	0.752	0.96
flgI	fliP	7102393	7102386	529507.PMI1647	529507.PMI1640	0.381	0	0.575	0	0.28	0	0	0.752	0.946
fliP	fliH	7102386	7102378	529507.PMI1640	529507.PMI1632	0.626	0	0	0	0.44	0	0	0.747	0.942
flhB	fliH	7102406	7102378	529507.PMI1660	529507.PMI1632	0.381	0	0.245	0	0.482	0	0	0.712	0.92
fliQ	fliJ	7102387	7102380	529507.PMI1641	529507.PMI1634	0.647	0	0	0	0.403	0	0	0.629	0.915
fliP	fliJ	7102386	7102380	529507.PMI1640	529507.PMI1634	0.66	0	0	0	0.45	0	0	0.573	0.913
fliQ	fliH	7102387	7102378	529507.PMI1641	529507.PMI1632	0.616	0	0	0	0.156	0	0	0.743	0.909
flgI	fliH	7102393	7102378	529507.PMI1647	529507.PMI1632	0.059	0	0.328	0	0.565	0	0	0.694	0.904
flgI	fliQ	7102393	7102387	529507.PMI1647	529507.PMI1641	0.381	0	0.242	0	0.134	0	0	0.789	0.902
fliN	fliJ	7102384	7102380	529507.PMI1638	529507.PMI1634	0.66	0	0	0	0.56	0	0	0.353	0.895
flhB	fliJ	7102406	7102380	529507.PMI1660	529507.PMI1634	0.352	0	0	0	0.281	0	0	0.599	0.797
flgI	fliJ	7102393	7102380	529507.PMI1647	529507.PMI1634	0	0	0.3	0	0.45	0	0	0.26	0.69
flgH	flgI	7102394	7102393	529507.PMI1648	529507.PMI1647	0.866	0	0.778	0	0.839	0.24	0	0.834	0.999
flgD	flgE	7102398	7102397	529507.PMI1652	529507.PMI1651	0.824	0.704	0.712	0	0.813	0.176	0	0.842	0.999
flgC	flgG	7102399	7102395	529507.PMI1653	529507.PMI1649	0.737	0	0.778	0	0.811	0.172	0	0.833	0.998
flgH	flgJ	7102394	7102392	529507.PMI1648	529507.PMI1646	0.892	0	0.767	0	0.842	0	0	0.65	0.998
flgD	flgG	7102398	7102395	529507.PMI1652	529507.PMI1649	0.751	0	0.721	0	0.902	0.126	0	0.752	0.998
flgI	flgJ	7102393	7102392	529507.PMI1647	529507.PMI1646	0.916	0	0.734	0	0.826	0	0	0.701	0.998
flgC	flgD	7102399	7102398	529507.PMI1653	529507.PMI1652	0.872	0	0.596	0	0.762	0.226	0	0.78	0.997
flgG	flgI	7102395	7102393	529507.PMI1649	529507.PMI1647	0.739	0	0.778	0	0.831	0	0	0.758	0.997
flgD	flgH	7102398	7102394	529507.PMI1652	529507.PMI1648	0.658	0	0.776	0	0.828	0	0	0.799	0.997
flgK	flgL	7102391	7102390	529507.PMI1645	529507.PMI1644	0.847	0	0.777	0	0.661	0	0	0.845	0.997
flgG	flgH	7102395	7102394	529507.PMI1649	529507.PMI1648	0.758	0	0.757	0	0.845	0	0	0.752	0.997
flgC	flgE	7102399	7102397	529507.PMI1653	529507.PMI1651	0.806	0	0.777	0	0.661	0	0	0.788	0.996
flgN	flgK	7102403	7102391	529507.PMI1657	529507.PMI1645	0.054	0	0.565	0	0.561	0.937	0	0.773	0.996
flgD	flgI	7102398	7102393	529507.PMI1652	529507.PMI1647	0.645	0	0.756	0	0.815	0	0	0.752	0.995
flgH	flgK	7102394	7102391	529507.PMI1648	529507.PMI1645	0.68	0	0.767	0	0.577	0.215	0	0.772	0.993
flgD	flgK	7102398	7102391	529507.PMI1652	529507.PMI1645	0.561	0	0.732	0	0.726	0	0	0.814	0.993
flgI	flgK	7102393	7102391	529507.PMI1647	529507.PMI1645	0.695	0	0.741	0	0.588	0	0	0.814	0.993
flgE	flgH	7102397	7102394	529507.PMI1651	529507.PMI1648	0.696	0	0.753	0	0.631	0	0	0.765	0.992
flgE	flgK	7102397	7102391	529507.PMI1651	529507.PMI1645	0.581	0	0.768	0	0.611	0	0	0.834	0.992
flgG	flgK	7102395	7102391	529507.PMI1649	529507.PMI1645	0.612	0	0.757	0	0.664	0	0	0.777	0.992
flgE	flgI	7102397	7102393	529507.PMI1651	529507.PMI1647	0.681	0	0.715	0	0.61	0	0	0.778	0.991
flgN	flgL	7102403	7102390	529507.PMI1657	529507.PMI1644	0	0	0.511	0	0.482	0.937	0	0.555	0.991
flgG	flgJ	7102395	7102392	529507.PMI1649	529507.PMI1646	0.789	0	0.353	0	0.83	0	0	0.651	0.99
flgL	fliD	7102390	7102367	529507.PMI1644	529507.PMI1621	0.377	0	0.76	0	0.598	0.17	0	0.833	0.99
flgD	flgJ	7102398	7102392	529507.PMI1652	529507.PMI1646	0.712	0	0.749	0	0.784	0	0	0.485	0.99
flgE	flgG	7102397	7102395	529507.PMI1651	529507.PMI1649	0.804	0.704	0.778	0.647	0.687	0	0	0.772	0.989
flgJ	flgK	7102392	7102391	529507.PMI1646	529507.PMI1645	0.755	0	0.709	0	0.661	0	0	0.58	0.988
flgC	flgI	7102399	7102393	529507.PMI1653	529507.PMI1647	0.637	0	0.745	0	0.56	0	0	0.752	0.988
flgC	flgK	7102399	7102391	529507.PMI1653	529507.PMI1645	0.556	0	0.776	0	0.567	0	0	0.761	0.988
flgE	flgL	7102397	7102390	529507.PMI1651	529507.PMI1644	0.575	0	0.754	0	0.452	0	0	0.814	0.987
flgK	fliD	7102391	7102367	529507.PMI1645	529507.PMI1621	0.381	0	0.735	0	0.57	0	0	0.84	0.987
flgC	flgL	7102399	7102390	529507.PMI1653	529507.PMI1644	0.552	0	0.759	0	0.436	0	0	0.789	0.985
flgC	flgH	7102399	7102394	529507.PMI1653	529507.PMI1648	0.649	0	0.64	0	0.589	0	0	0.752	0.985
flgD	flgL	7102398	7102390	529507.PMI1652	529507.PMI1644	0.556	0	0.632	0	0.477	0.17	0	0.827	0.985
flgE	fliD	7102397	7102367	529507.PMI1651	529507.PMI1621	0.381	0	0.75	0	0.484	0	0	0.821	0.983
flgH	flgL	7102394	7102390	529507.PMI1648	529507.PMI1644	0.667	0	0.674	0	0.285	0.215	0	0.739	0.981
flgE	flgJ	7102397	7102392	529507.PMI1651	529507.PMI1646	0.743	0	0.48	0	0.661	0	0	0.616	0.98
flgG	flgL	7102395	7102390	529507.PMI1649	529507.PMI1644	0.604	0	0.604	0	0.48	0.124	0	0.738	0.977
flgD	fliD	7102398	7102367	529507.PMI1652	529507.PMI1621	0.381	0	0.625	0	0.49	0	0	0.78	0.97
flgC	flgJ	7102399	7102392	529507.PMI1653	529507.PMI1646	0.704	0	0.32	0	0.673	0	0	0.57	0.967
flgI	flgL	7102393	7102390	529507.PMI1647	529507.PMI1644	0.68	0	0.371	0	0.195	0	0	0.804	0.964
flgJ	flgL	7102392	7102390	529507.PMI1646	529507.PMI1644	0.732	0	0.573	0	0.421	0	0	0.475	0.96
flgH	fliD	7102394	7102367	529507.PMI1648	529507.PMI1621	0.131	0	0.73	0	0.347	0	0	0.767	0.959
flgI	fliD	7102393	7102367	529507.PMI1647	529507.PMI1621	0.301	0	0.471	0	0.216	0.237	0	0.816	0.951
flgC	fliD	7102399	7102367	529507.PMI1653	529507.PMI1621	0.381	0	0.49	0	0.492	0	0	0.73	0.95
flgG	fliD	7102395	7102367	529507.PMI1649	529507.PMI1621	0.117	0	0.54	0	0.511	0	0	0.74	0.941
flgN	fliD	7102403	7102367	529507.PMI1657	529507.PMI1621	0	0	0.575	0	0.485	0	0	0.501	0.881
flgJ	fliD	7102392	7102367	529507.PMI1646	529507.PMI1621	0.105	0	0.65	0	0.344	0	0	0.276	0.831
flgN	flgD	7102403	7102398	529507.PMI1657	529507.PMI1652	0.089	0	0.446	0	0.447	0	0	0.18	0.74
flgN	flgH	7102403	7102394	529507.PMI1657	529507.PMI1648	0.06	0	0.624	0	0.25	0	0	0.048	0.713
flgN	flgE	7102403	7102397	529507.PMI1657	529507.PMI1651	0.067	0	0.295	0	0.342	0	0	0.415	0.713
flgN	flgC	7102403	7102399	529507.PMI1657	529507.PMI1653	0.094	0	0	0	0.477	0	0	0.412	0.697
flgN	flgJ	7102403	7102392	529507.PMI1657	529507.PMI1646	0.067	0	0.57	0	0.225	0	0	0.122	0.69
flgN	flgG	7102403	7102395	529507.PMI1657	529507.PMI1649	0.062	0	0	0	0.44	0	0	0.13	0.503
flgN	flgI	7102403	7102393	529507.PMI1657	529507.PMI1647	0.059	0	0.207	0	0.12	0	0	0.199	0.403
fliS	fliD	7102368	7102367	529507.PMI1622	529507.PMI1621	0.833	0	0.758	0	0.838	0.285	0	0.849	0.999
flgD	flgE	7102398	7102397	529507.PMI1652	529507.PMI1651	0.824	0.704	0.712	0	0.813	0.176	0	0.842	0.999
flgB	flgC	7102400	7102399	529507.PMI1654	529507.PMI1653	0.89	0	0.756	0	0.844	0	0	0.848	0.999
flgB	flgD	7102400	7102398	529507.PMI1654	529507.PMI1652	0.872	0	0.765	0	0.871	0.176	0	0.833	0.999
flgK	flgL	7102391	7102390	529507.PMI1645	529507.PMI1644	0.847	0	0.777	0	0.661	0	0	0.845	0.997
flgC	flgD	7102399	7102398	529507.PMI1653	529507.PMI1652	0.872	0	0.596	0	0.762	0.226	0	0.78	0.997
flgD	flgH	7102398	7102394	529507.PMI1652	529507.PMI1648	0.658	0	0.776	0	0.828	0	0	0.799	0.997
flgE	flgF	7102397	7102396	529507.PMI1651	529507.PMI1650	0.844	0	0.778	0	0.583	0	0	0.788	0.996
flgN	flgK	7102403	7102391	529507.PMI1657	529507.PMI1645	0.054	0	0.565	0	0.561	0.937	0	0.773	0.996
flgC	flgE	7102399	7102397	529507.PMI1653	529507.PMI1651	0.806	0	0.777	0	0.661	0	0	0.788	0.996
flgL	fliS	7102390	7102368	529507.PMI1644	529507.PMI1622	0.381	0	0.674	0	0.584	0.831	0	0.777	0.996
flgB	flgE	7102400	7102397	529507.PMI1654	529507.PMI1651	0.806	0	0.724	0	0.661	0	0	0.804	0.995
flgD	flgF	7102398	7102396	529507.PMI1652	529507.PMI1650	0.78	0	0.773	0	0.586	0	0	0.752	0.994
flgC	flgF	7102399	7102396	529507.PMI1653	529507.PMI1650	0.769	0	0.778	0	0.58	0	0	0.766	0.994
flgB	flgF	7102400	7102396	529507.PMI1654	529507.PMI1650	0.769	0	0.777	0	0.591	0	0	0.765	0.994
flgF	flgH	7102396	7102394	529507.PMI1650	529507.PMI1648	0.727	0	0.778	0	0.585	0.215	0	0.752	0.994
flgH	flgK	7102394	7102391	529507.PMI1648	529507.PMI1645	0.68	0	0.767	0	0.577	0.215	0	0.772	0.993
flgD	flgK	7102398	7102391	529507.PMI1652	529507.PMI1645	0.561	0	0.732	0	0.726	0	0	0.814	0.993
flgE	flgK	7102397	7102391	529507.PMI1651	529507.PMI1645	0.581	0	0.768	0	0.611	0	0	0.834	0.992
flgE	flgH	7102397	7102394	529507.PMI1651	529507.PMI1648	0.696	0	0.753	0	0.631	0	0	0.765	0.992
flgB	flgH	7102400	7102394	529507.PMI1654	529507.PMI1648	0.649	0	0.764	0	0.661	0	0	0.779	0.992
flgN	flgL	7102403	7102390	529507.PMI1657	529507.PMI1644	0	0	0.511	0	0.482	0.937	0	0.555	0.991
flgL	fliD	7102390	7102367	529507.PMI1644	529507.PMI1621	0.377	0	0.76	0	0.598	0.17	0	0.833	0.99
flgC	flgK	7102399	7102391	529507.PMI1653	529507.PMI1645	0.556	0	0.776	0	0.567	0	0	0.761	0.988
flgB	flgL	7102400	7102390	529507.PMI1654	529507.PMI1644	0.552	0	0.749	0	0.367	0.131	0	0.833	0.987
flgE	flgL	7102397	7102390	529507.PMI1651	529507.PMI1644	0.575	0	0.754	0	0.452	0	0	0.814	0.987
flgK	fliD	7102391	7102367	529507.PMI1645	529507.PMI1621	0.381	0	0.735	0	0.57	0	0	0.84	0.987
flgB	flgK	7102400	7102391	529507.PMI1654	529507.PMI1645	0.556	0	0.754	0	0.568	0	0	0.76	0.987
flgD	flgL	7102398	7102390	529507.PMI1652	529507.PMI1644	0.556	0	0.632	0	0.477	0.17	0	0.827	0.985
flgC	flgH	7102399	7102394	529507.PMI1653	529507.PMI1648	0.649	0	0.64	0	0.589	0	0	0.752	0.985
flgC	flgL	7102399	7102390	529507.PMI1653	529507.PMI1644	0.552	0	0.759	0	0.436	0	0	0.789	0.985
flgE	fliD	7102397	7102367	529507.PMI1651	529507.PMI1621	0.381	0	0.75	0	0.484	0	0	0.821	0.983
flgF	flgK	7102396	7102391	529507.PMI1650	529507.PMI1645	0.597	0	0.777	0	0.289	0	0	0.761	0.982
flgK	fliS	7102391	7102368	529507.PMI1645	529507.PMI1622	0.381	0	0.662	0	0.581	0.176	0	0.789	0.982
flgH	flgL	7102394	7102390	529507.PMI1648	529507.PMI1644	0.667	0	0.674	0	0.285	0.215	0	0.739	0.981
flgF	flgL	7102396	7102390	529507.PMI1650	529507.PMI1644	0.59	0	0.776	0	0.252	0	0	0.744	0.98
flgB	fliD	7102400	7102367	529507.PMI1654	529507.PMI1621	0.376	0	0.756	0	0.48	0	0	0.743	0.976
flgB	fliS	7102400	7102368	529507.PMI1654	529507.PMI1622	0.381	0	0.742	0	0.368	0	0	0.778	0.974
flgD	fliD	7102398	7102367	529507.PMI1652	529507.PMI1621	0.381	0	0.625	0	0.49	0	0	0.78	0.97
flgC	fliS	7102399	7102368	529507.PMI1653	529507.PMI1622	0.381	0	0.545	0	0.477	0	0	0.777	0.962
flgF	fliD	7102396	7102367	529507.PMI1650	529507.PMI1621	0.072	0	0.767	0	0.387	0	0	0.738	0.96
flgH	fliD	7102394	7102367	529507.PMI1648	529507.PMI1621	0.131	0	0.73	0	0.347	0	0	0.767	0.959
flgC	fliD	7102399	7102367	529507.PMI1653	529507.PMI1621	0.381	0	0.49	0	0.492	0	0	0.73	0.95
flgH	fliS	7102394	7102368	529507.PMI1648	529507.PMI1622	0.076	0	0.649	0	0.39	0.2	0	0.716	0.946
flgD	fliS	7102398	7102368	529507.PMI1652	529507.PMI1622	0.094	0	0.661	0	0.371	0	0	0.746	0.944
flgF	fliS	7102396	7102368	529507.PMI1650	529507.PMI1622	0.058	0	0.732	0	0.25	0	0	0.727	0.941
flgE	fliS	7102397	7102368	529507.PMI1651	529507.PMI1622	0.106	0	0.576	0	0.376	0	0	0.77	0.938
flgN	fliD	7102403	7102367	529507.PMI1657	529507.PMI1621	0	0	0.575	0	0.485	0	0	0.501	0.881
flgN	fliS	7102403	7102368	529507.PMI1657	529507.PMI1622	0	0	0.207	0	0.503	0	0	0.547	0.806
flgN	flgB	7102403	7102400	529507.PMI1657	529507.PMI1654	0.099	0	0.43	0	0.421	0	0	0.339	0.777
flgN	flgD	7102403	7102398	529507.PMI1657	529507.PMI1652	0.089	0	0.446	0	0.447	0	0	0.18	0.74
flgN	flgE	7102403	7102397	529507.PMI1657	529507.PMI1651	0.067	0	0.295	0	0.342	0	0	0.415	0.713
flgN	flgH	7102403	7102394	529507.PMI1657	529507.PMI1648	0.06	0	0.624	0	0.25	0	0	0.048	0.713
flgN	flgC	7102403	7102399	529507.PMI1657	529507.PMI1653	0.094	0	0	0	0.477	0	0	0.412	0.697
flgN	flgF	7102403	7102396	529507.PMI1657	529507.PMI1650	0.063	0	0.304	0	0.131	0	0	0.089	0.414
cheY	cheZ	7102408	7102407	529507.PMI1662	529507.PMI1661	0.897	0	0.707	0	0.578	0.945	0.8	0.913	0.999
cheR	cheB	7102410	7102409	529507.PMI1664	529507.PMI1663	0.897	0.893	0.778	0	0.533	0	0	0.84	0.999
cheA	cheY	7102414	7102408	529507.PMI1668	529507.PMI1662	0.533	0.841	0.577	0	0.579	0.945	0.8	0.865	0.999
cheA	cheW	7102414	7102413	529507.PMI1668	529507.PMI1667	0.844	0	0.778	0	0.819	0.865	0.8	0.916	0.999
cheW	cheB	7102413	7102409	529507.PMI1667	529507.PMI1663	0.567	0	0.778	0	0.512	0	0.8	0.842	0.998
PMI1665	cheR	7102411	7102410	529507.PMI1665	529507.PMI1664	0.906	0	0.778	0	0.272	0.461	0.8	0.399	0.998
cheA	cheB	7102414	7102409	529507.PMI1668	529507.PMI1663	0.554	0	0.778	0	0.535	0.215	0.8	0.865	0.998
cheW	PMI1666	7102413	7102412	529507.PMI1667	529507.PMI1666	0.632	0	0.778	0	0.48	0.678	0.8	0.239	0.997
cheA	PMI1665	7102414	7102411	529507.PMI1668	529507.PMI1665	0.567	0	0.778	0	0.462	0.682	0.8	0.271	0.997
cheW	cheY	7102413	7102408	529507.PMI1667	529507.PMI1662	0.543	0.051	0.588	0	0.471	0.171	0.8	0.858	0.997
cheA	PMI1666	7102414	7102412	529507.PMI1668	529507.PMI1666	0.614	0	0.778	0	0.462	0.682	0.8	0.271	0.997
cheW	PMI1665	7102413	7102411	529507.PMI1667	529507.PMI1665	0.581	0	0.778	0	0.48	0.678	0.8	0.239	0.997
PMI1665	cheB	7102411	7102409	529507.PMI1665	529507.PMI1663	0.907	0	0.778	0	0.191	0.219	0.8	0.28	0.997
PMI1666	cheR	7102412	7102410	529507.PMI1666	529507.PMI1664	0.778	0	0.778	0	0.272	0.461	0.8	0.399	0.997
cheR	cheY	7102410	7102408	529507.PMI1664	529507.PMI1662	0.763	0	0.526	0	0.479	0.669	0	0.846	0.996
cheA	cheZ	7102414	7102407	529507.PMI1668	529507.PMI1661	0.521	0	0.402	0	0.572	0.834	0	0.834	0.996
PMI1666	cheB	7102412	7102409	529507.PMI1666	529507.PMI1663	0.781	0	0.778	0	0.191	0.219	0.8	0.28	0.994
cheB	cheY	7102409	7102408	529507.PMI1663	529507.PMI1662	0.78	0	0.654	0	0.518	0	0	0.848	0.993
cheW	cheR	7102413	7102410	529507.PMI1667	529507.PMI1664	0.567	0	0.778	0	0.536	0	0	0.843	0.992
cheA	cheR	7102414	7102410	529507.PMI1668	529507.PMI1664	0.554	0	0.778	0	0.555	0.124	0	0.837	0.992
cheB	cheZ	7102409	7102407	529507.PMI1663	529507.PMI1661	0.756	0	0.49	0	0.567	0	0	0.834	0.989
cheR	cheZ	7102410	7102407	529507.PMI1664	529507.PMI1661	0.756	0	0.456	0	0.47	0.172	0	0.834	0.988
PMI1665	cheY	7102411	7102408	529507.PMI1665	529507.PMI1662	0.784	0	0.512	0	0.156	0.215	0.8	0.267	0.987
cheW	cheZ	7102413	7102407	529507.PMI1667	529507.PMI1661	0.531	0	0.661	0	0.572	0	0	0.832	0.987
PMI1666	cheY	7102412	7102408	529507.PMI1666	529507.PMI1662	0.692	0	0.542	0	0.156	0.215	0.8	0.267	0.983
cheA	PMI1180	7102414	7101928	529507.PMI1668	529507.PMI1180	0.378	0	0.778	0	0.462	0.682	0	0.271	0.979
PMI2809	cheW	7103525	7102413	529507.PMI2809	529507.PMI1667	0.378	0	0.778	0	0.48	0.678	0	0.239	0.979
PMI2808	cheA	7103524	7102414	529507.PMI2808	529507.PMI1668	0.378	0	0.778	0	0.462	0.682	0	0.271	0.979
PMI2809	cheA	7103525	7102414	529507.PMI2809	529507.PMI1668	0.378	0	0.778	0	0.462	0.682	0	0.271	0.979
PMI2808	cheW	7103524	7102413	529507.PMI2808	529507.PMI1667	0.378	0	0.778	0	0.48	0.678	0	0.239	0.979
cheW	PMI1180	7102413	7101928	529507.PMI1667	529507.PMI1180	0.378	0	0.778	0	0.48	0.678	0	0.239	0.979
cheR	PMI1180	7102410	7101928	529507.PMI1664	529507.PMI1180	0.364	0	0.778	0	0.272	0.461	0	0.415	0.961
PMI2808	cheR	7103524	7102410	529507.PMI2808	529507.PMI1664	0.364	0	0.778	0	0.17	0.451	0	0.279	0.945
PMI2809	cheR	7103525	7102410	529507.PMI2809	529507.PMI1664	0.364	0	0.778	0	0.17	0.451	0	0.279	0.945
PMI1666	PMI1665	7102412	7102411	529507.PMI1666	529507.PMI1665	0.666	0	0.778	0.881	0	0	0.8	0	0.936
cheB	PMI1180	7102409	7101928	529507.PMI1663	529507.PMI1180	0.372	0	0.778	0	0.191	0.219	0	0.28	0.925
PMI2809	cheB	7103525	7102409	529507.PMI2809	529507.PMI1663	0.372	0	0.778	0	0.152	0.215	0	0.268	0.919
PMI2808	cheB	7103524	7102409	529507.PMI2808	529507.PMI1663	0.372	0	0.778	0	0.152	0.215	0	0.268	0.919
PMI1665	cheZ	7102411	7102407	529507.PMI1665	529507.PMI1661	0.66	0	0.412	0	0.132	0.197	0	0.177	0.865
PMI1666	cheZ	7102412	7102407	529507.PMI1666	529507.PMI1661	0.524	0	0.496	0	0.132	0.197	0	0.177	0.837
cheY	PMI1180	7102408	7101928	529507.PMI1662	529507.PMI1180	0.38	0	0.514	0	0.156	0.215	0	0.28	0.83
PMI2809	cheY	7103525	7102408	529507.PMI2809	529507.PMI1662	0.38	0	0.502	0	0.156	0.215	0	0.28	0.826
PMI2808	cheY	7103524	7102408	529507.PMI2808	529507.PMI1662	0.38	0	0.478	0	0.156	0.215	0	0.28	0.817
PMI2808	cheZ	7103524	7102407	529507.PMI2808	529507.PMI1661	0.054	0	0.318	0	0.131	0.187	0	0.226	0.582
cheZ	PMI1180	7102407	7101928	529507.PMI1661	529507.PMI1180	0.054	0	0.295	0	0.132	0.197	0	0.226	0.574
PMI2809	cheZ	7103525	7102407	529507.PMI2809	529507.PMI1661	0.054	0	0.294	0	0.131	0.187	0	0.226	0.568
dnaJ	dnaK	7100812	7100811	529507.PMI0010	529507.PMI0009	0.724	0.002	0.778	0	0.81	0.834	0.539	0.865	0.999
grpE	dnaK	7102642	7100811	529507.PMI1900	529507.PMI0009	0.381	0	0.769	0	0.844	0.945	0.071	0.865	0.999
clpX	clpP	7100915	7100914	529507.PMI0116	529507.PMI0115	0.677	0.021	0.775	0	0.45	0.834	0	0.865	0.998
grpE	dnaJ	7102642	7100812	529507.PMI1900	529507.PMI0010	0.381	0	0.753	0	0.597	0.842	0	0.865	0.998
lon	clpX	7100916	7100915	529507.PMI0117	529507.PMI0116	0.632	0	0	0	0.48	0.536	0	0.649	0.964
lon	clpP	7100916	7100914	529507.PMI0117	529507.PMI0115	0.545	0	0	0	0.476	0.215	0	0.709	0.938
grpE	clpP	7102642	7100914	529507.PMI1900	529507.PMI0115	0	0	0	0	0.36	0.126	0	0.833	0.898
rpoS	dnaK	7102969	7100811	529507.PMI2236	529507.PMI0009	0.045	0	0	0	0.065	0.375	0	0.83	0.892
ftsH	dnaK	7104111	7100811	529507.PMI3412	529507.PMI0009	0.06	0	0.22	0	0.084	0.184	0.097	0.822	0.891
ftsH	grpE	7104111	7102642	529507.PMI3412	529507.PMI1900	0.055	0	0	0	0.153	0.125	0.496	0.722	0.884
grpE	clpX	7102642	7100915	529507.PMI1900	529507.PMI0116	0.048	0	0	0	0.07	0.366	0	0.814	0.882
hslV	dnaK	7103917	7100811	529507.PMI3216	529507.PMI0009	0.045	0	0	0	0.599	0.123	0	0.681	0.878
grpE	lon	7102642	7100916	529507.PMI1900	529507.PMI0117	0.061	0	0	0	0.514	0.12	0	0.721	0.873
sulA	lon	7101563	7100916	529507.PMI0786	529507.PMI0117	0	0	0	0	0	0.834	0	0.249	0.87
lon	dnaK	7100916	7100811	529507.PMI0117	529507.PMI0009	0.044	0	0	0	0.528	0.122	0	0.704	0.867
clpP	dnaK	7100914	7100811	529507.PMI0115	529507.PMI0009	0.044	0	0	0	0.154	0.12	0	0.835	0.866
rpoS	grpE	7102969	7102642	529507.PMI2236	529507.PMI1900	0	0	0	0	0.063	0.449	0	0.746	0.857
clpX	dnaK	7100915	7100811	529507.PMI0116	529507.PMI0009	0.044	0	0	0	0.095	0.123	0	0.833	0.856
ftsH	clpP	7104111	7100914	529507.PMI3412	529507.PMI0115	0	0	0	0	0.132	0	0	0.833	0.849
rpoS	lon	7102969	7100916	529507.PMI2236	529507.PMI0117	0.059	0	0	0	0.226	0	0	0.802	0.843
hslV	clpP	7103917	7100914	529507.PMI3216	529507.PMI0115	0.062	0	0	0	0.284	0.12	0	0.752	0.833
rpoS	clpX	7102969	7100915	529507.PMI2236	529507.PMI0116	0.106	0	0.156	0	0.157	0	0	0.753	0.822
eno	dnaK	7101017	7100811	529507.PMI0221	529507.PMI0009	0.059	0	0	0	0.131	0.21	0	0.757	0.822
ftsH	clpX	7104111	7100915	529507.PMI3412	529507.PMI0116	0	0	0	0	0.123	0	0	0.805	0.822
hslV	lon	7103917	7100916	529507.PMI3216	529507.PMI0117	0	0	0	0	0.546	0.127	0	0.566	0.812
ftsH	lon	7104111	7100916	529507.PMI3412	529507.PMI0117	0	0	0	0	0.403	0.273	0	0.592	0.807
eno	lon	7101017	7100916	529507.PMI0221	529507.PMI0117	0.068	0	0.228	0	0.061	0.654	0	0.301	0.806
lon	dnaJ	7100916	7100812	529507.PMI0117	529507.PMI0010	0.056	0	0	0	0.56	0	0	0.567	0.804
rpoS	dnaJ	7102969	7100812	529507.PMI2236	529507.PMI0010	0.062	0	0	0	0.063	0.453	0	0.626	0.796
clpP	dnaJ	7100914	7100812	529507.PMI0115	529507.PMI0010	0	0	0	0	0.118	0	0	0.778	0.795
rpoS	clpP	7102969	7100914	529507.PMI2236	529507.PMI0115	0.068	0	0	0	0.063	0	0	0.77	0.782
clpX	dnaJ	7100915	7100812	529507.PMI0116	529507.PMI0010	0	0	0	0	0.084	0	0	0.717	0.73
hslV	dnaJ	7103917	7100812	529507.PMI3216	529507.PMI0010	0.044	0	0	0	0.502	0	0	0.478	0.729
ftsH	hslV	7104111	7103917	529507.PMI3412	529507.PMI3216	0	0	0	0	0.103	0	0	0.696	0.715
hslV	grpE	7103917	7102642	529507.PMI3216	529507.PMI1900	0	0	0	0	0.575	0	0	0.232	0.659
hslV	clpX	7103917	7100915	529507.PMI3216	529507.PMI0116	0.064	0	0	0	0.1	0	0	0.627	0.658
ftsH	dnaJ	7104111	7100812	529507.PMI3412	529507.PMI0010	0	0	0	0	0.098	0	0	0.605	0.629
ftsH	eno	7104111	7101017	529507.PMI3412	529507.PMI0221	0.044	0	0.304	0	0.07	0.12	0	0.257	0.522
eno	clpP	7101017	7100914	529507.PMI0221	529507.PMI0115	0.105	0	0	0	0	0.119	0	0.394	0.48
rpoS	sulA	7102969	7101563	529507.PMI2236	529507.PMI0786	0	0	0.41	0	0	0.12	0	0.045	0.46
ftsH	rpoS	7104111	7102969	529507.PMI3412	529507.PMI2236	0.042	0	0	0	0.097	0	0	0.392	0.428
rpoS	eno	7102969	7101017	529507.PMI2236	529507.PMI0221	0.121	0	0	0	0.059	0.12	0	0.299	0.422
PMI2247	PMI1477	7102980	7102223	529507.PMI2247	529507.PMI1477	0.478	0	0.778	0.939	0.084	0	0.974	0.495	0.987
gltB	putA	7104367	7102362	529507.PMI3677	529507.PMI1616	0.058	0	0	0	0.198	0	0.9	0.797	0.982
putA	PMI1477	7102362	7102223	529507.PMI1616	529507.PMI1477	0.043	0	0	0	0	0	0	0.779	0.78
PMI2247	putA	7102980	7102362	529507.PMI2247	529507.PMI1616	0.043	0	0	0	0	0	0	0.779	0.78
gltB	PMI2247	7104367	7102980	529507.PMI3677	529507.PMI2247	0	0	0	0	0.063	0	0	0.769	0.774
gltB	PMI1477	7104367	7102223	529507.PMI3677	529507.PMI1477	0	0	0	0	0.063	0	0	0.769	0.774
rpoS	hns	7102969	7102234	529507.PMI2236	529507.PMI1488	0	0	0	0	0	0	0	0.755	0.755
fis	hns	7104312	7102234	529507.PMI3622	529507.PMI1488	0	0	0	0	0	0	0	0.711	0.711
ftsK	lrp	7101479	7101478	529507.PMI0697	529507.PMI0696	0.703	0	0	0	0	0	0	0.046	0.705
fis	rpoS	7104312	7102969	529507.PMI3622	529507.PMI2236	0	0	0	0	0.047	0	0	0.684	0.686
putA	lrp	7102362	7101478	529507.PMI1616	529507.PMI0696	0.43	0	0	0	0	0	0	0.411	0.65
gltB	lrp	7104367	7101478	529507.PMI3677	529507.PMI0696	0.056	0	0	0	0.06	0	0	0.631	0.644
rpoS	lrp	7102969	7101478	529507.PMI2236	529507.PMI0696	0	0	0	0	0	0	0	0.643	0.643
hns	lrp	7102234	7101478	529507.PMI1488	529507.PMI0696	0	0	0	0	0.061	0	0	0.627	0.634
argI	rpoS	7104156	7102969	529507.PMI3457	529507.PMI2236	0.062	0	0	0	0	0	0	0.606	0.615
argI	lrp	7104156	7101478	529507.PMI3457	529507.PMI0696	0.043	0	0	0	0	0	0.579	0.061	0.588
fis	lrp	7104312	7101478	529507.PMI3622	529507.PMI0696	0	0	0	0	0	0	0	0.565	0.565
potB	lrp	7103452	7101478	529507.PMI2736	529507.PMI0696	0.057	0	0	0	0	0.126	0.507	0	0.558
PMI1477	lrp	7102223	7101478	529507.PMI1477	529507.PMI0696	0.478	0	0	0	0.063	0	0	0.168	0.557
PMI2247	lrp	7102980	7101478	529507.PMI2247	529507.PMI0696	0.478	0	0	0	0.063	0	0	0.168	0.557
PMI1477	ftsK	7102223	7101479	529507.PMI1477	529507.PMI0697	0.464	0	0	0	0.097	0	0	0.065	0.507
PMI2247	ftsK	7102980	7101479	529507.PMI2247	529507.PMI0697	0.464	0	0	0	0.097	0	0	0.065	0.507
gltB	argI	7104367	7104156	529507.PMI3677	529507.PMI3457	0.32	0	0	0	0.102	0	0	0.178	0.454
rcsB	rcsD	7102476	7102475	529507.PMI1730	529507.PMI1729	0.81	0	0.288	0	0.085	0.309	0.8	0.778	0.995
rcsC	rcsD	7102477	7102475	529507.PMI1731	529507.PMI1729	0	0	0.766	0.606	0.063	0.945	0.8	0.748	0.994
PMI3678	rcsD	7104368	7102475	529507.PMI3678	529507.PMI1729	0	0	0.501	0	0.063	0.945	0	0.592	0.988
PMI3678	rcsC	7104368	7102477	529507.PMI3678	529507.PMI1731	0.409	0	0.663	0.614	0.273	0.945	0	0.786	0.986
PMI3678	phoQ	7104368	7101656	529507.PMI3678	529507.PMI0884	0.109	0	0.226	0	0.128	0.941	0	0.654	0.985
PMI3678	cheY	7104368	7102408	529507.PMI3678	529507.PMI1662	0.116	0.011	0.245	0	0.133	0.945	0	0.515	0.981
PMI3678	PMI1491	7104368	7102237	529507.PMI3678	529507.PMI1491	0.116	0	0.187	0	0.133	0.945	0	0.488	0.979
rcsF	rcsD	7102995	7102475	529507.PMI2262	529507.PMI1729	0	0	0.688	0	0	0	0.8	0.534	0.968
PMI3678	PMI2841	7104368	7103557	529507.PMI3678	529507.PMI2841	0.114	0	0	0	0.085	0.834	0	0.786	0.967
PMI3678	baeS	7104368	7102334	529507.PMI3678	529507.PMI1588	0.109	0.007	0.208	0.606	0.128	0.941	0	0.486	0.962
umoB	rcsF	7103732	7102995	529507.PMI3018	529507.PMI2262	0	0	0.758	0	0	0.741	0	0.387	0.958
rcsF	rcsC	7102995	7102477	529507.PMI2262	529507.PMI1731	0	0	0.239	0	0	0	0.8	0.499	0.917
rcsC	phoQ	7102477	7101656	529507.PMI1731	529507.PMI0884	0.109	0	0.723	0	0.127	0.583	0	0.173	0.912
PMI3678	rcsB	7104368	7102476	529507.PMI3678	529507.PMI1730	0.127	0	0.155	0	0.063	0.462	0	0.797	0.911
rcsD	phoQ	7102475	7101656	529507.PMI1729	529507.PMI0884	0	0	0.484	0	0.058	0.681	0	0.413	0.896
rcsC	cheY	7102477	7102408	529507.PMI1731	529507.PMI1662	0.109	0.019	0.495	0.787	0.127	0.842	0	0.294	0.886
rcsC	rcsB	7102477	7102476	529507.PMI1731	529507.PMI1730	0.119	0	0.187	0	0.063	0.234	0	0.777	0.865
cheY	phoQ	7102408	7101656	529507.PMI1662	529507.PMI0884	0.109	0	0.224	0	0.127	0.583	0	0.408	0.823
rcsD	baeS	7102475	7102334	529507.PMI1729	529507.PMI1588	0	0	0.326	0	0.058	0.681	0	0.126	0.799
rcsD	cheY	7102475	7102408	529507.PMI1729	529507.PMI1662	0	0	0	0	0.063	0.732	0	0.241	0.792
rcsC	PMI1491	7102477	7102237	529507.PMI1731	529507.PMI1491	0.109	0	0.338	0	0.127	0.583	0	0.184	0.792
umoB	rcsD	7103732	7102475	529507.PMI3018	529507.PMI1729	0	0	0.634	0	0.062	0	0	0.442	0.791
PMI2841	rcsC	7103557	7102477	529507.PMI2841	529507.PMI1731	0.111	0	0.172	0	0.085	0.437	0	0.494	0.773
PMI2841	rcsF	7103557	7102995	529507.PMI2841	529507.PMI2262	0	0	0.772	0	0	0	0	0	0.772
umoB	rcsC	7103732	7102477	529507.PMI3018	529507.PMI1731	0	0	0.666	0	0	0	0	0.336	0.768
rcsD	PMI1491	7102475	7102237	529507.PMI1729	529507.PMI1491	0	0	0	0	0.063	0.732	0	0.143	0.766
cheY	baeS	7102408	7102334	529507.PMI1662	529507.PMI1588	0.109	0.14	0.215	0	0.127	0.583	0	0.132	0.766
PMI1491	phoQ	7102237	7101656	529507.PMI1491	529507.PMI0884	0.109	0	0.181	0	0.127	0.583	0	0.246	0.763
PMI2841	cheY	7103557	7102408	529507.PMI2841	529507.PMI1662	0.078	0	0	0	0.072	0.669	0	0.21	0.746
PMI2841	rcsD	7103557	7102475	529507.PMI2841	529507.PMI1729	0	0	0.565	0	0	0.408	0	0.071	0.739
baeS	PMI1491	7102334	7102237	529507.PMI1588	529507.PMI1491	0.109	0	0.192	0	0.127	0.583	0	0.109	0.723
rcsC	baeS	7102477	7102334	529507.PMI1731	529507.PMI1588	0.109	0	0.437	0.62	0.127	0.583	0	0.176	0.718
umoB	PMI2841	7103732	7103557	529507.PMI3018	529507.PMI2841	0	0	0.713	0	0	0	0	0	0.713
rcsF	phoQ	7102995	7101656	529507.PMI2262	529507.PMI0884	0	0	0.541	0	0	0	0	0.361	0.694
rcsB	PMI1491	7102476	7102237	529507.PMI1730	529507.PMI1491	0.042	0	0.446	0	0.062	0.234	0	0.143	0.613
umoB	phoQ	7103732	7101656	529507.PMI3018	529507.PMI0884	0	0	0.502	0	0	0	0	0.243	0.606
PMI2841	rcsB	7103557	7102476	529507.PMI2841	529507.PMI1730	0.379	0	0	0	0.062	0.22	0	0.109	0.541
rcsB	phoQ	7102476	7101656	529507.PMI1730	529507.PMI0884	0.104	0	0.167	0	0.062	0	0	0.416	0.536
PMI2841	PMI1491	7103557	7102237	529507.PMI2841	529507.PMI1491	0.078	0	0	0	0.063	0.437	0	0.109	0.508
PMI2841	phoQ	7103557	7101656	529507.PMI2841	529507.PMI0884	0.053	0	0.427	0	0.067	0	0	0.11	0.489
rcsB	cheY	7102476	7102408	529507.PMI1730	529507.PMI1662	0.042	0	0	0	0.062	0.234	0	0.306	0.459
rcsF	rcsB	7102995	7102476	529507.PMI2262	529507.PMI1730	0	0	0	0	0.059	0	0	0.427	0.438
umoB	rcsB	7103732	7102476	529507.PMI3018	529507.PMI1730	0	0	0	0	0	0	0	0.415	0.415
PMI3114	PMI3113	7103819	7103818	529507.PMI3114	529507.PMI3113	0.84	0	0	0	0	0	0	0	0.84
PMI3116	umoA	7103821	7103820	529507.PMI3116	529507.PMI3115	0.531	0	0	0	0	0	0	0	0.531
umoA	PMI3114	7103820	7103819	529507.PMI3115	529507.PMI3114	0.452	0	0	0	0	0	0	0	0.452
umoA	PMI3113	7103820	7103818	529507.PMI3115	529507.PMI3113	0.444	0	0	0	0	0	0	0	0.444
PMI3116	PMI3114	7103821	7103819	529507.PMI3116	529507.PMI3114	0.309	0	0.223	0	0	0	0	0	0.44
rcsF	rcsD	7102995	7102475	529507.PMI2262	529507.PMI1729	0	0	0.688	0	0	0	0.8	0.534	0.968
umoB	rcsF	7103732	7102995	529507.PMI3018	529507.PMI2262	0	0	0.758	0	0	0.741	0	0.387	0.958
rffC	wzzE	7104022	7104017	529507.PMI3322	529507.PMI3317	0.538	0	0.658	0	0.063	0	0	0.37	0.894
rffC	umoB	7104022	7103732	529507.PMI3322	529507.PMI3018	0	0	0.776	0	0	0	0	0.123	0.795
umoB	rcsD	7103732	7102475	529507.PMI3018	529507.PMI1729	0	0	0.634	0	0.062	0	0	0.442	0.791
wzzE	umoB	7104017	7103732	529507.PMI3317	529507.PMI3018	0	0	0.769	0	0	0	0	0.093	0.781
umoB	PMI2870	7103732	7103586	529507.PMI3018	529507.PMI2870	0	0	0.778	0	0	0	0	0	0.778
PMI0830	holE1	7101601	7101323	529507.PMI0830	529507.PMI0538	0	0	0.778	0	0	0	0	0	0.778
PMI3603	holE1	7104293	7101323	529507.PMI3603	529507.PMI0538	0	0	0.777	0	0	0	0	0	0.777
umoB	PMI0830	7103732	7101601	529507.PMI3018	529507.PMI0830	0	0	0.777	0	0	0	0	0	0.777
PMI3603	PMI0830	7104293	7101601	529507.PMI3603	529507.PMI0830	0	0	0.776	0	0	0	0	0	0.776
PMI2548	holE1	7103282	7101323	529507.PMI2548	529507.PMI0538	0	0	0.776	0	0	0	0	0	0.776
wzzE	PMI0830	7104017	7101601	529507.PMI3317	529507.PMI0830	0	0	0.776	0	0	0	0	0	0.776
umoB	holE1	7103732	7101323	529507.PMI3018	529507.PMI0538	0	0	0.775	0	0	0	0	0	0.775
wzzE	holE1	7104017	7101323	529507.PMI3317	529507.PMI0538	0	0	0.774	0	0	0	0	0	0.774
PMI3603	rcsF	7104293	7102995	529507.PMI3603	529507.PMI2262	0	0	0.77	0	0.061	0	0	0	0.774
PMI3603	wzzE	7104293	7104017	529507.PMI3603	529507.PMI3317	0	0	0.773	0	0	0	0	0	0.773
umoB	PMI0401	7103732	7101188	529507.PMI3018	529507.PMI0401	0	0	0.772	0	0	0	0	0	0.772
PMI2548	PMI0830	7103282	7101601	529507.PMI2548	529507.PMI0830	0	0	0.772	0	0	0	0	0	0.772
PMI3603	umoB	7104293	7103732	529507.PMI3603	529507.PMI3018	0	0	0.772	0	0	0	0	0	0.772
umoB	PMI2548	7103732	7103282	529507.PMI3018	529507.PMI2548	0	0	0.772	0	0	0	0	0	0.772
PMI3603	PMI2548	7104293	7103282	529507.PMI3603	529507.PMI2548	0	0	0.755	0	0	0	0	0	0.755
PMI2548	PMI0401	7103282	7101188	529507.PMI2548	529507.PMI0401	0	0	0.755	0	0	0	0	0	0.755
rcsF	PMI0830	7102995	7101601	529507.PMI2262	529507.PMI0830	0	0	0.752	0	0	0	0	0	0.752
wzzE	PMI2548	7104017	7103282	529507.PMI3317	529507.PMI2548	0	0	0.745	0	0	0	0	0	0.745
rffC	PMI2870	7104022	7103586	529507.PMI3322	529507.PMI2870	0	0	0.744	0	0	0	0	0	0.744
rffC	PMI0830	7104022	7101601	529507.PMI3322	529507.PMI0830	0	0	0.742	0	0	0	0	0	0.742
rffC	holE1	7104022	7101323	529507.PMI3322	529507.PMI0538	0	0	0.736	0	0	0	0	0	0.736
PMI2870	holE1	7103586	7101323	529507.PMI2870	529507.PMI0538	0	0	0.733	0	0	0	0	0	0.733
PMI2870	PMI0830	7103586	7101601	529507.PMI2870	529507.PMI0830	0	0	0.711	0	0	0	0	0	0.711
PMI2870	PMI2548	7103586	7103282	529507.PMI2870	529507.PMI2548	0	0	0.705	0	0.057	0	0	0	0.709
PMI3603	rcsD	7104293	7102475	529507.PMI3603	529507.PMI1729	0	0	0.695	0	0.06	0	0	0	0.701
rcsF	PMI0401	7102995	7101188	529507.PMI2262	529507.PMI0401	0	0	0.691	0	0	0	0	0	0.691
wzzE	rcsF	7104017	7102995	529507.PMI3317	529507.PMI2262	0	0	0.626	0	0.06	0	0	0.182	0.687
PMI3603	rffC	7104293	7104022	529507.PMI3603	529507.PMI3322	0	0	0.685	0	0	0	0	0	0.685
rffC	PMI0401	7104022	7101188	529507.PMI3322	529507.PMI0401	0.044	0	0.672	0	0.063	0	0	0	0.68
rffC	rcsF	7104022	7102995	529507.PMI3322	529507.PMI2262	0	0	0.665	0	0	0	0	0.084	0.68
PMI3603	PMI2870	7104293	7103586	529507.PMI3603	529507.PMI2870	0	0	0.653	0	0	0	0	0	0.653
PMI2870	PMI0401	7103586	7101188	529507.PMI2870	529507.PMI0401	0	0	0.641	0	0	0	0	0	0.641
PMI0830	PMI0401	7101601	7101188	529507.PMI0830	529507.PMI0401	0	0	0.639	0	0	0	0	0	0.639
PMI2870	rcsF	7103586	7102995	529507.PMI2870	529507.PMI2262	0	0	0.621	0	0.062	0	0	0	0.629
rffC	PMI2548	7104022	7103282	529507.PMI3322	529507.PMI2548	0.046	0	0.624	0	0	0	0	0	0.625
wzzE	PMI2870	7104017	7103586	529507.PMI3317	529507.PMI2870	0	0	0.618	0	0	0	0	0	0.618
rcsD	PMI0401	7102475	7101188	529507.PMI1729	529507.PMI0401	0	0	0.582	0	0	0	0	0	0.582
rcsF	holE1	7102995	7101323	529507.PMI2262	529507.PMI0538	0	0	0.576	0	0	0	0	0	0.576
PMI2548	rcsD	7103282	7102475	529507.PMI2548	529507.PMI1729	0	0	0.556	0	0	0	0	0	0.556
PMI2548	rcsF	7103282	7102995	529507.PMI2548	529507.PMI2262	0	0	0.554	0	0	0	0	0	0.554
holE1	PMI0401	7101323	7101188	529507.PMI0538	529507.PMI0401	0	0	0.55	0	0	0	0	0	0.55
PMI3603	PMI0401	7104293	7101188	529507.PMI3603	529507.PMI0401	0	0	0.516	0	0	0	0	0	0.516
rcsD	holE1	7102475	7101323	529507.PMI1729	529507.PMI0538	0	0	0.48	0	0	0	0	0	0.48
wzzE	PMI0401	7104017	7101188	529507.PMI3317	529507.PMI0401	0	0	0.422	0	0	0	0	0	0.422
PMI3206	PMI1873	7103907	7102615	529507.PMI3206	529507.PMI1873	0	0	0.778	0	0	0	0	0	0.778
PMI2511	PMI1964	7103245	7102702	529507.PMI2511	529507.PMI1964	0	0	0.777	0	0	0	0	0	0.777
PMI3206	secM	7103907	7102796	529507.PMI3206	529507.PMI2062	0	0	0.777	0	0	0	0	0	0.777
PMI2950	PMI1873	7103666	7102615	529507.PMI2950	529507.PMI1873	0	0	0.776	0	0	0	0	0	0.776
PMI0870	PMI0130	7101642	7100929	529507.PMI0870	529507.PMI0130	0	0	0.775	0	0	0	0	0	0.775
PMI3206	PMI0130	7103907	7100929	529507.PMI3206	529507.PMI0130	0	0	0.773	0	0	0	0	0	0.773
umoD	PMI0130	7101648	7100929	529507.PMI0876	529507.PMI0130	0	0	0.768	0	0	0	0	0	0.768
PMI3206	PMI0870	7103907	7101642	529507.PMI3206	529507.PMI0870	0	0	0.767	0	0	0	0	0	0.767
PMI1964	umoD	7102702	7101648	529507.PMI1964	529507.PMI0876	0	0	0.765	0	0	0	0	0	0.765
secM	PMI1873	7102796	7102615	529507.PMI2062	529507.PMI1873	0	0	0.761	0	0	0	0	0	0.761
PMI3206	PMI2950	7103907	7103666	529507.PMI3206	529507.PMI2950	0	0	0.759	0	0	0	0	0	0.759
PMI2511	umoD	7103245	7101648	529507.PMI2511	529507.PMI0876	0	0	0.756	0	0	0	0	0	0.756
PMI1873	umoD	7102615	7101648	529507.PMI1873	529507.PMI0876	0	0	0.75	0	0	0	0	0	0.75
PMI1873	PMI0870	7102615	7101642	529507.PMI1873	529507.PMI0870	0	0	0.747	0	0	0	0	0	0.747
PMI1873	PMI0130	7102615	7100929	529507.PMI1873	529507.PMI0130	0	0	0.744	0	0	0	0	0	0.744
PMI1964	PMI1236	7102702	7101982	529507.PMI1964	529507.PMI1236	0	0	0.739	0	0	0	0	0	0.739
PMI1964	PMI0870	7102702	7101642	529507.PMI1964	529507.PMI0870	0	0	0.739	0	0	0	0	0	0.739
PMI1236	umoD	7101982	7101648	529507.PMI1236	529507.PMI0876	0	0	0.728	0	0	0	0	0	0.728
PMI1964	PMI1873	7102702	7102615	529507.PMI1964	529507.PMI1873	0	0	0.723	0	0	0	0	0	0.723
PMI2950	PMI2511	7103666	7103245	529507.PMI2950	529507.PMI2511	0	0	0.703	0	0	0	0	0	0.703
PMI2511	PMI1236	7103245	7101982	529507.PMI2511	529507.PMI1236	0	0	0.703	0	0	0	0	0	0.703
secM	umoD	7102796	7101648	529507.PMI2062	529507.PMI0876	0	0	0.697	0	0	0	0	0	0.697
PMI3206	umoD	7103907	7101648	529507.PMI3206	529507.PMI0876	0	0	0.697	0	0	0	0	0	0.697
secM	PMI0130	7102796	7100929	529507.PMI2062	529507.PMI0130	0	0	0.695	0	0	0	0	0	0.695
umoD	PMI0870	7101648	7101642	529507.PMI0876	529507.PMI0870	0	0	0.672	0	0	0	0	0	0.672
PMI2950	umoD	7103666	7101648	529507.PMI2950	529507.PMI0876	0	0	0.629	0	0	0	0	0.143	0.668
secM	PMI1964	7102796	7102702	529507.PMI2062	529507.PMI1964	0	0	0.659	0	0	0	0	0	0.659
PMI3395	umoD	7104094	7101648	529507.PMI3395	529507.PMI0876	0	0	0.658	0	0	0	0	0	0.658
PMI3206	PMI1964	7103907	7102702	529507.PMI3206	529507.PMI1964	0	0	0.642	0	0	0	0	0	0.642
secM	PMI0870	7102796	7101642	529507.PMI2062	529507.PMI0870	0	0	0.634	0	0	0	0	0	0.634
PMI2511	PMI1873	7103245	7102615	529507.PMI2511	529507.PMI1873	0	0	0.614	0	0	0	0	0	0.614
PMI3395	PMI1964	7104094	7102702	529507.PMI3395	529507.PMI1964	0	0	0.604	0	0	0	0	0	0.604
PMI2511	PMI0870	7103245	7101642	529507.PMI2511	529507.PMI0870	0	0	0.603	0	0	0	0	0	0.603
secM	PMI1236	7102796	7101982	529507.PMI2062	529507.PMI1236	0	0	0.551	0	0	0	0	0	0.551
PMI3395	PMI2511	7104094	7103245	529507.PMI3395	529507.PMI2511	0	0	0.547	0	0	0	0	0	0.547
PMI2950	secM	7103666	7102796	529507.PMI2950	529507.PMI2062	0	0	0.542	0	0	0	0	0	0.542
PMI3206	PMI1236	7103907	7101982	529507.PMI3206	529507.PMI1236	0	0	0.538	0	0	0	0	0	0.538
PMI3395	PMI0870	7104094	7101642	529507.PMI3395	529507.PMI0870	0	0	0.536	0	0	0	0	0	0.536
PMI2950	PMI0870	7103666	7101642	529507.PMI2950	529507.PMI0870	0	0	0.534	0	0	0	0	0	0.534
PMI1964	PMI0130	7102702	7100929	529507.PMI1964	529507.PMI0130	0	0	0.414	0	0	0	0	0	0.414
tdh	adhE	7103879	7102232	529507.PMI3178	529507.PMI1486	0.117	0	0	0	0.129	0.246	0.752	0.507	0.916
adhE	PMI1208	7102232	7101955	529507.PMI1486	529507.PMI1208	0.043	0	0	0	0.078	0.215	0.752	0.271	0.851
adhE	disA	7102232	7101956	529507.PMI1486	529507.PMI1209	0	0	0	0	0.118	0.181	0.589	0.161	0.717
nnrD	disA	7102198	7101956	529507.PMI1452	529507.PMI1209	0.089	0	0	0	0.661	0	0	0	0.677
pncA	disA	7102247	7101956	529507.PMI1501	529507.PMI1209	0	0	0	0	0.674	0	0	0	0.674
disA	PMI0406	7101956	7101193	529507.PMI1209	529507.PMI0406	0	0	0	0	0.674	0	0	0	0.674
PMI2203	disA	7102936	7101956	529507.PMI2203	529507.PMI1209	0	0	0	0	0.674	0	0	0	0.674
pncA	nnrD	7102247	7102198	529507.PMI1501	529507.PMI1452	0.051	0	0	0	0.661	0	0	0	0.664
PMI2203	nnrD	7102936	7102198	529507.PMI2203	529507.PMI1452	0.051	0	0	0	0.661	0	0	0	0.664
nnrD	PMI0406	7102198	7101193	529507.PMI1452	529507.PMI0406	0.051	0	0	0	0.661	0	0	0	0.664
tdh	PMI1208	7103879	7101955	529507.PMI3178	529507.PMI1208	0.053	0	0.189	0	0.122	0	0.53	0.089	0.658
PMI2163	disA	7102897	7101956	529507.PMI2163	529507.PMI1209	0	0	0.642	0	0	0	0	0	0.642
disA	PMI1208	7101956	7101955	529507.PMI1209	529507.PMI1208	0	0	0.178	0	0.082	0	0.539	0	0.621
tdh	disA	7103879	7101956	529507.PMI3178	529507.PMI1209	0	0	0	0	0.137	0	0.525	0.093	0.595
PMI2745	disA	7103461	7101956	529507.PMI2745	529507.PMI1209	0	0	0	0	0.076	0.121	0.503	0.045	0.562
tyrP	disA	7102484	7101956	529507.PMI1738	529507.PMI1209	0	0	0	0	0.076	0.121	0.503	0.045	0.562
waaF	waaC	7103876	7103875	529507.PMI3175	529507.PMI3174	0.89	0.762	0.777	0.611	0.413	0	0.931	0.815	0.999
hldD	hldE	7103877	7103091	529507.PMI3176	529507.PMI2358	0.381	0	0.731	0	0.063	0.119	0.965	0.81	0.998
hldE	gmhB	7103091	7102991	529507.PMI2358	529507.PMI2258	0.381	0	0.77	0	0	0	0.965	0.758	0.998
hldD	waaF	7103877	7103876	529507.PMI3176	529507.PMI3175	0.894	0	0.769	0	0.132	0	0	0.789	0.994
hldD	waaC	7103877	7103875	529507.PMI3176	529507.PMI3174	0.894	0	0.63	0	0.062	0	0	0.73	0.988
waaF	waaQ	7103876	7103869	529507.PMI3175	529507.PMI3168	0.381	0	0.748	0.623	0.061	0	0.912	0.617	0.969
waaC	waaQ	7103875	7103869	529507.PMI3174	529507.PMI3168	0.381	0	0.71	0.629	0	0	0.912	0.538	0.966
waaF	hldE	7103876	7103091	529507.PMI3175	529507.PMI2358	0.381	0	0.767	0	0.101	0.119	0	0.724	0.962
waaC	hldE	7103875	7103091	529507.PMI3174	529507.PMI2358	0.381	0	0.74	0	0.131	0.12	0	0.645	0.948
waaF	gmhB	7103876	7102991	529507.PMI3175	529507.PMI2258	0.381	0.603	0.469	0	0	0.12	0	0.318	0.907
hldD	PMI3173	7103877	7103874	529507.PMI3176	529507.PMI3173	0.771	0	0	0	0.095	0	0.539	0.109	0.904
waaQ	hldE	7103869	7103091	529507.PMI3168	529507.PMI2358	0.381	0	0.762	0	0.101	0.119	0	0.11	0.877
hldD	gmhB	7103877	7102991	529507.PMI3176	529507.PMI2258	0.381	0	0.363	0	0	0	0.135	0.681	0.876
rffD	hldD	7104019	7103877	529507.PMI3319	529507.PMI3176	0.381	0	0	0	0.126	0.398	0.539	0.21	0.859
hldD	waaQ	7103877	7103869	529507.PMI3176	529507.PMI3168	0.381	0	0.583	0	0.062	0	0	0.48	0.857
waaQ	waaE	7103869	7103867	529507.PMI3168	529507.PMI3166	0.669	0	0.426	0	0	0	0	0.304	0.856
hldD	waaE	7103877	7103867	529507.PMI3176	529507.PMI3166	0.381	0	0.443	0	0.095	0	0.539	0.115	0.849
kbl	hldD	7103878	7103877	529507.PMI3177	529507.PMI3176	0.617	0	0	0	0.069	0	0.539	0.065	0.825
waaQ	gmhB	7103869	7102991	529507.PMI3168	529507.PMI2258	0.381	0.037	0.654	0	0	0	0	0.208	0.815
hldD	galE	7103877	7102689	529507.PMI3176	529507.PMI1951	0.304	0	0	0	0.063	0.177	0.539	0.341	0.807
waaF	waaE	7103876	7103867	529507.PMI3175	529507.PMI3166	0.381	0	0.338	0	0	0	0	0.386	0.726
waaF	PMI3173	7103876	7103874	529507.PMI3175	529507.PMI3173	0.687	0	0	0	0	0	0	0.075	0.699
waaC	PMI3173	7103875	7103874	529507.PMI3174	529507.PMI3173	0.687	0	0	0	0	0	0	0.075	0.699
waaC	gmhB	7103875	7102991	529507.PMI3174	529507.PMI2258	0.381	0	0.367	0	0	0.119	0	0.151	0.667
waaC	waaE	7103875	7103867	529507.PMI3174	529507.PMI3166	0.381	0	0	0	0	0	0	0.38	0.6
PMI3173	galE	7103874	7102689	529507.PMI3173	529507.PMI1951	0.341	0	0.19	0	0.133	0	0	0.109	0.532
waaC	galE	7103875	7102689	529507.PMI3174	529507.PMI1951	0.122	0	0	0	0	0	0	0.465	0.51
kbl	waaC	7103878	7103875	529507.PMI3177	529507.PMI3174	0.406	0	0	0	0	0	0	0.163	0.482
kbl	waaF	7103878	7103876	529507.PMI3177	529507.PMI3175	0.406	0	0	0	0	0	0	0.161	0.481
waaE	galE	7103867	7102689	529507.PMI3166	529507.PMI1951	0.341	0	0	0	0.133	0	0	0.134	0.461
waaF	galE	7103876	7102689	529507.PMI3175	529507.PMI1951	0.062	0	0	0	0	0	0	0.417	0.43
rffD	PMI3173	7104019	7103874	529507.PMI3319	529507.PMI3173	0.381	0	0	0	0	0	0	0.075	0.402
rffD	waaE	7104019	7103867	529507.PMI3319	529507.PMI3166	0.381	0	0	0	0	0	0	0.075	0.402
galE	galT	7102689	7102688	529507.PMI1951	529507.PMI1950	0.778	0	0	0	0.926	0.225	0.965	0.463	0.999
galT	galK	7102688	7102687	529507.PMI1950	529507.PMI1949	0.701	0.672	0.776	0	0.697	0.293	0.965	0.525	0.999
galE	PMI1490	7102689	7102236	529507.PMI1951	529507.PMI1490	0.381	0.064	0.18	0	0.063	0	0.965	0.778	0.995
galE	galK	7102689	7102687	529507.PMI1951	529507.PMI1949	0.638	0	0.156	0	0.827	0.435	0	0.815	0.993
ugd	PMI1490	7103890	7102236	529507.PMI3189	529507.PMI1490	0.381	0	0	0	0.156	0.122	0.965	0.518	0.991
ugd	galE	7103890	7102689	529507.PMI3189	529507.PMI1951	0.381	0	0	0	0.158	0	0.956	0.365	0.983
galT	pgm	7102688	7101332	529507.PMI1950	529507.PMI0548	0.079	0	0	0	0.164	0	0.965	0.211	0.976
PMI1490	pgm	7102236	7101332	529507.PMI1490	529507.PMI0548	0.068	0	0	0	0	0	0.965	0.235	0.973
galT	PMI1490	7102688	7102236	529507.PMI1950	529507.PMI1490	0	0	0	0	0	0.119	0.965	0.082	0.969
rffH	pgm	7104021	7101332	529507.PMI3321	529507.PMI0548	0	0	0	0	0	0	0.956	0.043	0.956
galK	PMI1490	7102687	7102236	529507.PMI1949	529507.PMI1490	0	0	0	0	0	0	0.591	0.858	0.939
ugd	bcsA	7103890	7102833	529507.PMI3189	529507.PMI2099	0.309	0	0	0	0.06	0.119	0.9	0.09	0.938
ugd	PMI3097	7103890	7103803	529507.PMI3189	529507.PMI3097	0.309	0	0	0	0.06	0.119	0.9	0.09	0.938
bcsA	PMI1490	7102833	7102236	529507.PMI2099	529507.PMI1490	0.301	0	0	0	0	0	0.9	0.109	0.932
PMI3097	PMI1490	7103803	7102236	529507.PMI3097	529507.PMI1490	0.301	0	0	0	0	0	0.9	0.109	0.932
rffH	PMI1490	7104021	7102236	529507.PMI3321	529507.PMI1490	0.381	0	0	0.623	0	0	0.8	0.383	0.888
glmM	PMI1490	7104113	7102236	529507.PMI3414	529507.PMI1490	0.381	0.003	0.16	0	0.062	0.398	0.631	0.147	0.886
rpsL	PMI1490	7103511	7102236	529507.PMI2795	529507.PMI1490	0	0	0	0	0.062	0	0	0.865	0.868
rpsL	galK	7103511	7102687	529507.PMI2795	529507.PMI1949	0	0	0	0	0	0	0	0.852	0.852
PMI3097	bcsA	7103803	7102833	529507.PMI3097	529507.PMI2099	0	0	0.778	0.905	0	0	0.8	0	0.814
ugd	galT	7103890	7102688	529507.PMI3189	529507.PMI1950	0	0	0	0	0.06	0	0.8	0	0.803
rpsL	galE	7103511	7102689	529507.PMI2795	529507.PMI1951	0	0	0	0	0	0	0	0.796	0.796
glmM	pgm	7104113	7101332	529507.PMI3414	529507.PMI0548	0.059	0	0.249	0	0.085	0.397	0.491	0.117	0.783
rffH	galE	7104021	7102689	529507.PMI3321	529507.PMI1951	0.381	0	0	0	0	0	0.581	0.15	0.76
rffH	ugd	7104021	7103890	529507.PMI3321	529507.PMI3189	0.381	0	0	0	0	0	0.581	0.084	0.741
glmM	rffH	7104113	7104021	529507.PMI3414	529507.PMI3321	0.121	0	0	0	0	0	0.539	0.109	0.607
glmM	galT	7104113	7102688	529507.PMI3414	529507.PMI1950	0.084	0	0	0	0	0	0.547	0.06	0.575
galK	pgm	7102687	7101332	529507.PMI1949	529507.PMI0548	0	0	0	0	0.084	0.403	0	0.14	0.488
galE	PMI1490	7102689	7102236	529507.PMI1951	529507.PMI1490	0.381	0.064	0.18	0	0.063	0	0.965	0.778	0.995
ugd	PMI3188	7103890	7103889	529507.PMI3189	529507.PMI3188	0.848	0	0	0	0.192	0	0.956	0.118	0.994
ugd	PMI3102	7103890	7103808	529507.PMI3189	529507.PMI3102	0.381	0	0	0	0.156	0.122	0.965	0.518	0.991
ugd	PMI1490	7103890	7102236	529507.PMI3189	529507.PMI1490	0.381	0	0	0	0.156	0.122	0.965	0.518	0.991
ugd	galE	7103890	7102689	529507.PMI3189	529507.PMI1951	0.381	0	0	0	0.158	0	0.956	0.365	0.983
ugd	PMI1489	7103890	7102235	529507.PMI3189	529507.PMI1489	0.366	0	0	0	0.192	0	0.956	0.118	0.977
PMI3102	galE	7103808	7102689	529507.PMI3102	529507.PMI1951	0.381	0.052	0.182	0	0.063	0	0.673	0.778	0.959
ugd	bcsA	7103890	7102833	529507.PMI3189	529507.PMI2099	0.309	0	0	0	0.06	0.119	0.9	0.09	0.938
ugd	PMI3097	7103890	7103803	529507.PMI3189	529507.PMI3097	0.309	0	0	0	0.06	0.119	0.9	0.09	0.938
cpsF	PMI3188	7103891	7103889	529507.PMI3190	529507.PMI3188	0.825	0	0.429	0	0.063	0	0	0.363	0.932
PMI3097	PMI1490	7103803	7102236	529507.PMI3097	529507.PMI1490	0.301	0	0	0	0	0	0.9	0.109	0.932
bcsA	PMI1490	7102833	7102236	529507.PMI2099	529507.PMI1490	0.301	0	0	0	0	0	0.9	0.109	0.932
PMI1489	arnA	7102235	7101810	529507.PMI1489	529507.PMI1045	0.067	0	0	0.615	0.045	0.226	0.907	0.061	0.927
PMI3188	arnA	7103889	7101810	529507.PMI3188	529507.PMI1045	0.067	0	0	0.615	0.045	0.226	0.907	0.061	0.927
ugd	arnA	7103890	7101810	529507.PMI3189	529507.PMI1045	0.062	0	0	0	0.06	0	0.9	0	0.904
PMI3195	PMI3188	7103896	7103889	529507.PMI3195	529507.PMI3188	0.764	0	0	0	0.095	0	0.539	0.109	0.9
cpsF	ugd	7103891	7103890	529507.PMI3190	529507.PMI3189	0.866	0	0	0	0	0	0	0	0.866
PMI1490	PMI1489	7102236	7102235	529507.PMI1490	529507.PMI1489	0.653	0.003	0	0	0	0	0.581	0.138	0.864
PMI3195	ugd	7103896	7103890	529507.PMI3195	529507.PMI3189	0.806	0	0	0	0.154	0	0	0.12	0.843
PMI3195	cpsF	7103896	7103891	529507.PMI3195	529507.PMI3190	0.821	0	0	0	0.061	0	0	0.141	0.843
PMI3097	bcsA	7103803	7102833	529507.PMI3097	529507.PMI2099	0	0	0.778	0.905	0	0	0.8	0	0.814
PMI3188	PMI1489	7103889	7102235	529507.PMI3188	529507.PMI1489	0	0	0.778	0.972	0	0	0.8	0	0.804
PMI3188	galE	7103889	7102689	529507.PMI3188	529507.PMI1951	0.381	0	0	0.647	0.063	0.177	0.583	0.263	0.792
PMI3188	PMI1490	7103889	7102236	529507.PMI3188	529507.PMI1490	0.378	0.002	0	0	0	0	0.581	0.241	0.785
PMI3188	PMI3102	7103889	7103808	529507.PMI3188	529507.PMI3102	0.378	0.002	0	0	0	0	0.581	0.241	0.785
galE	PMI1489	7102689	7102235	529507.PMI1951	529507.PMI1489	0.381	0	0	0.649	0.063	0.177	0.583	0.16	0.784
PMI3102	PMI1489	7103808	7102235	529507.PMI3102	529507.PMI1489	0.378	0.002	0	0	0	0	0.581	0.138	0.755
PMI3195	PMI1489	7103896	7102235	529507.PMI3195	529507.PMI1489	0.38	0	0	0	0.095	0	0.539	0.109	0.738
PMI3195	galE	7103896	7102689	529507.PMI3195	529507.PMI1951	0.381	0	0.491	0	0.133	0	0	0.137	0.732
cpsF	PMI1489	7103891	7102235	529507.PMI3190	529507.PMI1489	0.367	0	0.423	0	0.063	0	0	0.095	0.648
PMI3195	arnA	7103896	7101810	529507.PMI3195	529507.PMI1045	0.098	0	0	0	0.129	0	0.539	0.046	0.608
PMI3102	PMI3097	7103808	7103803	529507.PMI3102	529507.PMI3097	0.575	0	0	0	0	0	0	0.109	0.605
cpsF	galE	7103891	7102689	529507.PMI3190	529507.PMI1951	0.381	0	0.19	0	0.063	0	0	0.229	0.589
PMI3195	bcsA	7103896	7102833	529507.PMI3195	529507.PMI2099	0.133	0	0.198	0	0.1	0.125	0	0.075	0.401
wzz	gsk	7102916	7102915	529507.PMI2182	529507.PMI2181	0.588	0	0.16	0	0	0	0	0.463	0.798
wzz	flgM	7102916	7102402	529507.PMI2182	529507.PMI1656	0	0	0.746	0	0	0	0	0.094	0.76
feoC	PMI1303	7103638	7102049	529507.PMI2922	529507.PMI1303	0	0	0.73	0	0	0	0	0	0.73
wzz	PMI1303	7102916	7102049	529507.PMI2182	529507.PMI1303	0	0	0.711	0	0	0	0	0	0.711
hemH	wzz	7102917	7102916	529507.PMI2183	529507.PMI2182	0.522	0	0	0	0	0	0	0.399	0.7
hemH	gsk	7102917	7102915	529507.PMI2183	529507.PMI2181	0.407	0	0	0	0.059	0	0	0.475	0.682
feoC	wzz	7103638	7102916	529507.PMI2922	529507.PMI2182	0	0	0.676	0	0	0	0	0	0.676
wzz	PMI0492	7102916	7101279	529507.PMI2182	529507.PMI0492	0	0	0.652	0	0	0	0	0	0.652
wzz	PMI0921	7102916	7101693	529507.PMI2182	529507.PMI0921	0	0	0.65	0	0	0	0	0	0.65
wzz	PMI2163	7102916	7102897	529507.PMI2182	529507.PMI2163	0	0	0.641	0	0	0	0	0	0.641
wzz	PMI0965	7102916	7101733	529507.PMI2182	529507.PMI0965	0	0	0.638	0	0	0	0	0	0.638
flgM	PMI1303	7102402	7102049	529507.PMI1656	529507.PMI1303	0	0	0.635	0	0	0	0	0	0.635
wzz	hmuR2	7102916	7102172	529507.PMI2182	529507.PMI1426	0	0	0.63	0	0	0	0	0	0.63
feoC	hmuR2	7103638	7102172	529507.PMI2922	529507.PMI1426	0	0	0.499	0	0.062	0	0	0.058	0.518
gsk	PMI1303	7102915	7102049	529507.PMI2181	529507.PMI1303	0	0	0.504	0	0	0	0	0	0.504
hmuR2	PMI1303	7102172	7102049	529507.PMI1426	529507.PMI1303	0	0	0.496	0	0	0	0	0	0.496
feoC	PMI0921	7103638	7101693	529507.PMI2922	529507.PMI0921	0	0	0.461	0	0	0	0	0	0.461
feoC	PMI0965	7103638	7101733	529507.PMI2922	529507.PMI0965	0	0	0.457	0	0	0	0	0	0.457
feoC	PMI0492	7103638	7101279	529507.PMI2922	529507.PMI0492	0	0	0.456	0	0	0	0	0	0.456
PMI1303	PMI0965	7102049	7101733	529507.PMI1303	529507.PMI0965	0	0	0.429	0	0	0	0	0	0.429
PMI1303	PMI0921	7102049	7101693	529507.PMI1303	529507.PMI0921	0	0	0.411	0	0	0	0	0	0.411
PMI1303	PMI0492	7102049	7101279	529507.PMI1303	529507.PMI0492	0	0	0.411	0	0	0	0	0	0.411
rpoA	rpoC	7103980	7103500	529507.PMI3280	529507.PMI2784	0.381	0	0.38	0	0.602	0.931	0.903	0.757	0.999
rpoB	rpoC	7103501	7103500	529507.PMI2785	529507.PMI2784	0.693	0.898	0.776	0	0.985	0.945	0.903	0.834	0.999
rpoA	rpoB	7103980	7103501	529507.PMI3280	529507.PMI2785	0.381	0	0.296	0	0.814	0.89	0.903	0.752	0.999
rpoZ	rpoC	7103579	7103500	529507.PMI2863	529507.PMI2784	0.042	0	0	0	0.127	0.945	0.903	0.633	0.998
rpoA	rpoZ	7103980	7103579	529507.PMI3280	529507.PMI2863	0.381	0	0	0	0.447	0.89	0.903	0.469	0.997
rpoZ	rpoB	7103579	7103501	529507.PMI2863	529507.PMI2785	0	0	0	0	0.154	0.94	0.903	0.126	0.995
ndk	relA	7102591	7101013	529507.PMI1849	529507.PMI0217	0.061	0	0	0	0.058	0	0.965	0.129	0.97
nrdD	ndk	7104150	7102591	529507.PMI3451	529507.PMI1849	0	0	0	0	0	0	0.965	0	0.965
rpoA	pykF	7103980	7102151	529507.PMI3280	529507.PMI1405	0	0	0	0	0.063	0.13	0.9	0.574	0.96
rpoA	pykA	7103980	7101903	529507.PMI3280	529507.PMI1155	0	0	0	0	0.063	0.13	0.9	0.574	0.96
cyaA	relA	7104033	7101013	529507.PMI3333	529507.PMI0217	0	0	0.428	0	0.062	0	0.9	0.111	0.945
rpoZ	relA	7103579	7101013	529507.PMI2863	529507.PMI0217	0.347	0	0	0	0.061	0.187	0.9	0.075	0.945
rpoB	ndk	7103501	7102591	529507.PMI2785	529507.PMI1849	0.044	0	0	0	0.061	0.401	0.9	0.111	0.943
rpoC	PMI2409	7103500	7103142	529507.PMI2784	529507.PMI2409	0.251	0	0	0	0.06	0	0.9	0.247	0.939
rpoC	pykA	7103500	7101903	529507.PMI2784	529507.PMI1155	0.251	0	0	0	0.06	0	0.9	0.238	0.939
rpoC	pykF	7103500	7102151	529507.PMI2784	529507.PMI1405	0.251	0	0	0	0.06	0	0.9	0.239	0.939
rpoB	pykA	7103501	7101903	529507.PMI2785	529507.PMI1155	0.275	0	0	0	0.063	0	0.9	0.195	0.938
rpoB	pykF	7103501	7102151	529507.PMI2785	529507.PMI1405	0.275	0	0	0	0.063	0	0.9	0.178	0.936
rpoB	PMI2409	7103501	7103142	529507.PMI2785	529507.PMI2409	0.275	0	0	0	0.063	0	0.9	0.178	0.936
rpoA	PMI2409	7103980	7103142	529507.PMI3280	529507.PMI2409	0	0	0	0	0.063	0.13	0.9	0.265	0.932
rpoC	relA	7103500	7101013	529507.PMI2784	529507.PMI0217	0.053	0	0	0	0	0.215	0.9	0.162	0.929
rpoB	relA	7103501	7101013	529507.PMI2785	529507.PMI0217	0.057	0	0	0	0	0.13	0.9	0.15	0.921
ndk	pykF	7102591	7102151	529507.PMI1849	529507.PMI1405	0	0	0	0	0.063	0	0.9	0.178	0.916
PMI2409	ndk	7103142	7102591	529507.PMI2409	529507.PMI1849	0	0	0	0	0.063	0	0.9	0.178	0.916
ndk	pykA	7102591	7101903	529507.PMI1849	529507.PMI1155	0	0	0	0	0.063	0	0.9	0.178	0.916
rpoA	ndk	7103980	7102591	529507.PMI3280	529507.PMI1849	0.059	0	0	0	0.084	0.124	0.9	0.068	0.916
nrdD	pykA	7104150	7101903	529507.PMI3451	529507.PMI1155	0.06	0	0	0	0	0.122	0.9	0.097	0.915
nrdD	pykF	7104150	7102151	529507.PMI3451	529507.PMI1405	0.06	0	0	0	0	0.122	0.9	0.098	0.915
rpoA	relA	7103980	7101013	529507.PMI3280	529507.PMI0217	0.059	0	0	0	0	0	0.9	0.162	0.914
cyaA	rpoC	7104033	7103500	529507.PMI3333	529507.PMI2784	0	0	0.184	0	0	0	0.9	0	0.914
cyaA	pykF	7104033	7102151	529507.PMI3333	529507.PMI1405	0	0	0	0	0	0.119	0.9	0.098	0.913
cyaA	pykA	7104033	7101903	529507.PMI3333	529507.PMI1155	0	0	0	0	0	0.119	0.9	0.093	0.913
rpoZ	ndk	7103579	7102591	529507.PMI2863	529507.PMI1849	0	0	0	0	0.085	0.129	0.9	0	0.913
nrdD	rpoB	7104150	7103501	529507.PMI3451	529507.PMI2785	0	0	0	0	0	0	0.9	0.16	0.912
cyaA	PMI2409	7104033	7103142	529507.PMI3333	529507.PMI2409	0	0	0	0	0	0.119	0.9	0.084	0.912
nrdD	PMI2409	7104150	7103142	529507.PMI3451	529507.PMI2409	0.06	0	0	0	0	0.122	0.9	0.061	0.912
PMI2409	relA	7103142	7101013	529507.PMI2409	529507.PMI0217	0.044	0	0	0	0.058	0	0.9	0.118	0.909
rpoC	ndk	7103500	7102591	529507.PMI2784	529507.PMI1849	0.046	0	0	0	0.063	0	0.9	0.105	0.909
pykF	relA	7102151	7101013	529507.PMI1405	529507.PMI0217	0.044	0	0	0	0.058	0	0.9	0.118	0.909
pykA	relA	7101903	7101013	529507.PMI1155	529507.PMI0217	0.044	0	0	0	0.058	0	0.9	0.118	0.909
nrdD	cyaA	7104150	7104033	529507.PMI3451	529507.PMI3333	0	0	0	0	0	0	0.9	0.11	0.907
rpoZ	PMI2409	7103579	7103142	529507.PMI2863	529507.PMI2409	0.045	0	0	0	0.063	0.048	0.9	0	0.903
rpoZ	pykF	7103579	7102151	529507.PMI2863	529507.PMI1405	0.045	0	0	0	0.063	0.048	0.9	0	0.903
rpoZ	pykA	7103579	7101903	529507.PMI2863	529507.PMI1155	0.045	0	0	0	0.063	0.048	0.9	0	0.903
cyaA	rpoB	7104033	7103501	529507.PMI3333	529507.PMI2785	0	0	0	0	0	0	0.9	0.063	0.902
cyaA	rpoA	7104033	7103980	529507.PMI3333	529507.PMI3280	0	0	0	0	0	0	0.9	0	0.9
nrdD	rpoZ	7104150	7103579	529507.PMI3451	529507.PMI2863	0	0	0	0	0	0	0.9	0	0.9
nrdD	relA	7104150	7101013	529507.PMI3451	529507.PMI0217	0.043	0	0	0	0	0	0.9	0	0.9
nrdD	rpoA	7104150	7103980	529507.PMI3451	529507.PMI3280	0	0	0	0	0	0	0.9	0	0.9
cyaA	ndk	7104033	7102591	529507.PMI3333	529507.PMI1849	0	0	0	0	0	0	0.9	0	0.9
nrdD	rpoC	7104150	7103500	529507.PMI3451	529507.PMI2784	0	0	0	0	0	0	0.9	0	0.9
cyaA	rpoZ	7104033	7103579	529507.PMI3333	529507.PMI2863	0	0	0	0	0	0	0.9	0	0.9
PMI2409	pykF	7103142	7102151	529507.PMI2409	529507.PMI1405	0	0	0.778	0.814	0	0	0.8	0	0.828
pykF	pykA	7102151	7101903	529507.PMI1405	529507.PMI1155	0	0	0.778	0.826	0	0	0.8	0.074	0.827
PMI2409	pykA	7103142	7101903	529507.PMI2409	529507.PMI1155	0	0	0.778	0.924	0	0	0.8	0	0.811
aceF	lpdA	7102781	7102780	529507.PMI2045	529507.PMI2044	0.67	0.085	0.776	0	0.55	0.75	0.965	0.653	0.999
lpdA	sucB	7102780	7101354	529507.PMI2044	529507.PMI0570	0.381	0.142	0.744	0	0.55	0.741	0.965	0.614	0.999
aceE	aceF	7102782	7102781	529507.PMI2046	529507.PMI2045	0.882	0.016	0.75	0	0.667	0.848	0.965	0.703	0.999
aceE	lpdA	7102782	7102780	529507.PMI2046	529507.PMI2044	0.658	0	0.641	0	0.392	0.13	0.965	0.624	0.998
PMI2409	maeB	7103142	7102298	529507.PMI2409	529507.PMI1552	0.384	0	0	0	0.127	0.18	0.955	0.495	0.988
maeB	pykF	7102298	7102151	529507.PMI1552	529507.PMI1405	0.384	0	0	0	0.127	0.18	0.955	0.495	0.988
maeB	pykA	7102298	7101903	529507.PMI1552	529507.PMI1155	0.384	0	0	0	0.127	0.18	0.955	0.495	0.988
poxB	maeB	7103935	7102298	529507.PMI3235	529507.PMI1552	0.062	0	0	0	0.151	0	0.974	0.385	0.985
aceE	maeB	7102782	7102298	529507.PMI2046	529507.PMI1552	0	0	0	0	0.063	0	0.974	0.175	0.978
poxB	aceE	7103935	7102782	529507.PMI3235	529507.PMI2046	0	0	0.156	0	0	0.12	0.965	0.114	0.974
poxB	pykF	7103935	7102151	529507.PMI3235	529507.PMI1405	0	0	0	0	0.062	0.122	0.965	0.211	0.974
poxB	pykA	7103935	7101903	529507.PMI3235	529507.PMI1155	0	0	0	0	0.062	0.122	0.965	0.211	0.974
poxB	lpdA	7103935	7102780	529507.PMI3235	529507.PMI2044	0	0	0	0	0.063	0	0.965	0.177	0.971
aceE	pykF	7102782	7102151	529507.PMI2046	529507.PMI1405	0.051	0	0	0	0	0	0.965	0.128	0.969
aceE	pykA	7102782	7101903	529507.PMI2046	529507.PMI1155	0.051	0	0	0	0	0	0.965	0.128	0.969
poxB	aceF	7103935	7102781	529507.PMI3235	529507.PMI2045	0	0	0	0	0.062	0	0.965	0.109	0.969
poxB	PMI2409	7103935	7103142	529507.PMI3235	529507.PMI2409	0	0	0	0	0.062	0.122	0.956	0.211	0.968
PMI2409	maeA	7103142	7101426	529507.PMI2409	529507.PMI0642	0.07	0	0	0	0.086	0.18	0.952	0.113	0.965
PMI2409	aceE	7103142	7102782	529507.PMI2409	529507.PMI2046	0.051	0	0	0	0	0	0.96	0.128	0.964
pykA	maeA	7101903	7101426	529507.PMI1155	529507.PMI0642	0.07	0	0	0	0.086	0.18	0.951	0.113	0.964
pykF	maeA	7102151	7101426	529507.PMI1405	529507.PMI0642	0.07	0	0	0	0.086	0.18	0.951	0.113	0.964
aceE	maeA	7102782	7101426	529507.PMI2046	529507.PMI0642	0	0	0	0	0.062	0	0.957	0.127	0.961
poxB	maeA	7103935	7101426	529507.PMI3235	529507.PMI0642	0.043	0	0	0	0.151	0	0.951	0.068	0.958
aceE	sucB	7102782	7101354	529507.PMI2046	529507.PMI0570	0.381	0	0	0	0.38	0.667	0.584	0.124	0.944
aceE	tal	7102782	7100808	529507.PMI2046	529507.PMI0006	0	0	0	0	0	0	0.913	0.305	0.937
pykA	tal	7101903	7100808	529507.PMI1155	529507.PMI0006	0.089	0	0	0	0.085	0	0.8	0.666	0.937
pykF	tal	7102151	7100808	529507.PMI1405	529507.PMI0006	0.089	0	0	0	0.085	0	0.8	0.652	0.934
maeB	maeA	7102298	7101426	529507.PMI1552	529507.PMI0642	0.064	0.005	0	0.605	0.062	0.398	0.8	0.766	0.915
lpdA	maeB	7102780	7102298	529507.PMI2044	529507.PMI1552	0.321	0	0	0	0.103	0	0.752	0.482	0.911
aceF	maeB	7102781	7102298	529507.PMI2045	529507.PMI1552	0.3	0	0	0	0.129	0	0.752	0.486	0.911
maeB	sucB	7102298	7101354	529507.PMI1552	529507.PMI0570	0.3	0	0	0	0.129	0	0.752	0.486	0.911
PMI2409	tal	7103142	7100808	529507.PMI2409	529507.PMI0006	0.089	0	0	0	0.085	0	0.8	0.363	0.879
PMI2409	pykF	7103142	7102151	529507.PMI2409	529507.PMI1405	0	0	0.778	0.814	0	0	0.8	0	0.828
pykF	pykA	7102151	7101903	529507.PMI1405	529507.PMI1155	0	0	0.778	0.826	0	0	0.8	0.074	0.827
PMI2409	pykA	7103142	7101903	529507.PMI2409	529507.PMI1155	0	0	0.778	0.924	0	0	0.8	0	0.811
lpdA	pykA	7102780	7101903	529507.PMI2044	529507.PMI1155	0.06	0	0.172	0	0.121	0	0.666	0.275	0.804
lpdA	pykF	7102780	7102151	529507.PMI2044	529507.PMI1405	0.06	0	0.156	0	0.121	0	0.666	0.275	0.8
aceF	pykF	7102781	7102151	529507.PMI2045	529507.PMI1405	0.082	0	0	0	0.085	0	0.669	0.23	0.757
aceF	pykA	7102781	7101903	529507.PMI2045	529507.PMI1155	0.082	0	0	0	0.085	0	0.669	0.23	0.757
PMI2409	lpdA	7103142	7102780	529507.PMI2409	529507.PMI2044	0.06	0	0.164	0	0.121	0	0.584	0.275	0.753
aceF	sucB	7102781	7101354	529507.PMI2045	529507.PMI0570	0	0	0.772	0.729	0.063	0	0.584	0.389	0.709
pykF	sucB	7102151	7101354	529507.PMI1405	529507.PMI0570	0.082	0	0	0	0.085	0	0.581	0.232	0.693
pykA	sucB	7101903	7101354	529507.PMI1155	529507.PMI0570	0.082	0	0	0	0.085	0	0.581	0.232	0.693
lpdA	maeA	7102780	7101426	529507.PMI2044	529507.PMI0642	0	0	0.154	0	0.092	0	0.588	0.109	0.68
PMI2409	sucB	7103142	7101354	529507.PMI2409	529507.PMI0570	0.082	0	0	0	0.085	0	0.581	0.188	0.675
lpdA	tal	7102780	7100808	529507.PMI2044	529507.PMI0006	0.055	0	0	0	0.275	0	0	0.561	0.672
PMI2409	aceF	7103142	7102781	529507.PMI2409	529507.PMI2045	0.082	0	0	0	0.085	0	0.584	0.127	0.654
poxB	sucB	7103935	7101354	529507.PMI3235	529507.PMI0570	0	0	0	0	0.062	0	0.584	0.143	0.636
aceF	maeA	7102781	7101426	529507.PMI2045	529507.PMI0642	0.044	0	0	0	0.115	0	0.547	0.109	0.612
maeA	sucB	7101426	7101354	529507.PMI0642	529507.PMI0570	0.044	0	0	0	0.115	0	0.539	0.109	0.605
aceF	tal	7102781	7100808	529507.PMI2045	529507.PMI0006	0	0	0	0	0.063	0	0.483	0.234	0.596
sucB	tal	7101354	7100808	529507.PMI0570	529507.PMI0006	0	0	0	0	0.063	0	0.483	0.109	0.53
maeB	tal	7102298	7100808	529507.PMI1552	529507.PMI0006	0.042	0	0	0	0.074	0	0	0.432	0.452
frdA	sdhC	7104278	7101349	529507.PMI3588	529507.PMI0565	0.337	0	0	0	0.904	0.892	0.913	0.7	0.999
sdhB	sdhD	7101352	7101350	529507.PMI0568	529507.PMI0566	0.821	0	0.588	0	0.658	0.945	0.914	0.272	0.999
frdA	sdhB	7104278	7101352	529507.PMI3588	529507.PMI0568	0.364	0.003	0.772	0	0.985	0.838	0.913	0.834	0.999
frdB	sdhC	7104277	7101349	529507.PMI3587	529507.PMI0565	0.348	0	0	0	0.985	0.837	0.911	0.15	0.999
sucD	sucC	7101356	7101355	529507.PMI0572	529507.PMI0571	0.902	0.769	0.778	0	0.985	0.945	0.914	0.789	0.999
sdhB	sdhC	7101352	7101349	529507.PMI0568	529507.PMI0565	0.821	0	0.624	0	0.985	0.945	0.914	0.722	0.999
sdhB	sdhA	7101352	7101351	529507.PMI0568	529507.PMI0567	0.826	0.077	0.778	0	0.985	0.838	0.913	0.776	0.999
frdA	frdB	7104278	7104277	529507.PMI3588	529507.PMI3587	0.906	0	0.778	0	0.985	0.844	0.913	0.631	0.999
sdhA	sdhC	7101351	7101349	529507.PMI0567	529507.PMI0565	0.902	0	0.644	0	0.904	0.892	0.913	0.712	0.999
frdB	sdhA	7104277	7101351	529507.PMI3587	529507.PMI0567	0.364	0	0.777	0	0.985	0.844	0.913	0.591	0.999
sdhD	sdhC	7101350	7101349	529507.PMI0566	529507.PMI0565	0.89	0	0.776	0	0.818	0.945	0.914	0.57	0.999
sdhA	sdhD	7101351	7101350	529507.PMI0567	529507.PMI0566	0.902	0	0.584	0	0.482	0.841	0.913	0.559	0.999
nuoC	sdhB	7102505	7101352	529507.PMI1760	529507.PMI0568	0.062	0	0	0	0.993	0	0.752	0.127	0.998
sucD	sdhB	7101356	7101352	529507.PMI0572	529507.PMI0568	0.544	0	0.185	0	0.64	0.183	0.965	0.599	0.998
frdB	nuoC	7104277	7102505	529507.PMI3587	529507.PMI1760	0.062	0	0	0	0.993	0	0.752	0.127	0.998
sucC	sdhA	7101355	7101351	529507.PMI0571	529507.PMI0567	0.524	0	0.176	0	0.61	0.215	0.965	0.628	0.998
frdA	sdhD	7104278	7101350	529507.PMI3588	529507.PMI0566	0.337	0	0	0	0.482	0.841	0.913	0.559	0.997
sucD	sdhA	7101356	7101351	529507.PMI0572	529507.PMI0567	0.527	0	0.21	0	0.569	0.326	0.965	0.481	0.997
sucC	sdhB	7101355	7101352	529507.PMI0571	529507.PMI0568	0.54	0	0.154	0	0.564	0.183	0.965	0.607	0.997
frdA	sucC	7104278	7101355	529507.PMI3588	529507.PMI0571	0.374	0	0.195	0	0.61	0.215	0.965	0.56	0.997
frdA	sucD	7104278	7101356	529507.PMI3588	529507.PMI0572	0.378	0	0.244	0	0.569	0.326	0.965	0.387	0.996
frdA	nuoC	7104278	7102505	529507.PMI3588	529507.PMI1760	0.048	0	0	0	0.843	0.842	0.752	0.495	0.996
nuoC	sdhA	7102505	7101351	529507.PMI1760	529507.PMI0567	0.048	0	0	0	0.843	0.842	0.752	0.495	0.996
frdB	sucD	7104277	7101356	529507.PMI3587	529507.PMI0572	0.377	0	0.314	0	0.64	0.183	0.956	0.381	0.995
frdB	sdhD	7104277	7101350	529507.PMI3587	529507.PMI0566	0.348	0	0	0	0.476	0.834	0.911	0.128	0.994
frdA	fumC	7104278	7102042	529507.PMI3588	529507.PMI1296	0.381	0	0	0	0.45	0.126	0.965	0.523	0.994
sucC	sdhC	7101355	7101349	529507.PMI0571	529507.PMI0565	0.517	0	0	0	0.429	0	0.965	0.399	0.993
frdB	sucC	7104277	7101355	529507.PMI3587	529507.PMI0571	0.372	0	0.239	0	0.564	0.183	0.956	0.283	0.993
fumC	sdhB	7102042	7101352	529507.PMI1296	529507.PMI0568	0.169	0	0	0	0.482	0.12	0.965	0.492	0.992
fumC	sdhA	7102042	7101351	529507.PMI1296	529507.PMI0567	0.381	0	0	0	0.45	0.126	0.965	0.283	0.991
sucD	sdhC	7101356	7101349	529507.PMI0572	529507.PMI0565	0.524	0	0	0	0.48	0	0.965	0.133	0.991
nuoC	sdhC	7102505	7101349	529507.PMI1760	529507.PMI0565	0.053	0	0	0	0.921	0.461	0.752	0.273	0.991
fumC	sdhC	7102042	7101349	529507.PMI1296	529507.PMI0565	0	0	0	0	0.609	0.119	0.965	0.19	0.989
sucD	sdhD	7101356	7101350	529507.PMI0572	529507.PMI0566	0.524	0	0	0	0.377	0	0.965	0.043	0.989
sucC	sdhD	7101355	7101350	529507.PMI0571	529507.PMI0566	0.517	0	0	0	0.371	0	0.965	0.046	0.988
frdB	fumC	7104277	7102042	529507.PMI3587	529507.PMI1296	0.169	0	0	0	0.482	0.12	0.965	0.232	0.988
sdhC	cyoB	7101349	7100906	529507.PMI0565	529507.PMI0107	0	0	0	0	0.481	0.12	0.965	0.075	0.983
sdhB	cyoB	7101352	7100906	529507.PMI0568	529507.PMI0107	0	0	0	0	0.481	0	0.965	0.076	0.982
sdhA	cyoB	7101351	7100906	529507.PMI0567	529507.PMI0107	0	0	0	0	0.34	0.127	0.965	0.096	0.979
fumC	sdhD	7102042	7101350	529507.PMI1296	529507.PMI0566	0	0	0	0	0.07	0	0.965	0	0.966
nuoC	cyoB	7102505	7100906	529507.PMI1760	529507.PMI0107	0	0	0	0	0.583	0	0.752	0.389	0.931
sdhD	cyoB	7101350	7100906	529507.PMI0566	529507.PMI0107	0	0	0	0	0.482	0	0.673	0.491	0.906
nuoC	sdhD	7102505	7101350	529507.PMI1760	529507.PMI0566	0	0	0	0	0.368	0	0.752	0	0.836
frdB	sdhB	7104277	7101352	529507.PMI3587	529507.PMI0568	0	0	0.778	0.828	0	0	0.8	0.045	0.826
frdA	sdhA	7104278	7101351	529507.PMI3588	529507.PMI0567	0	0	0.778	0.843	0	0	0.8	0	0.824
frdA	cyoB	7104278	7100906	529507.PMI3588	529507.PMI0107	0	0	0	0	0.34	0.127	0.673	0.096	0.806
nuoC	sucD	7102505	7101356	529507.PMI1760	529507.PMI0572	0	0	0	0	0.662	0	0	0.176	0.709
frdB	cyoB	7104277	7100906	529507.PMI3587	529507.PMI0107	0	0	0	0	0.284	0	0.586	0.076	0.702
fumC	sucD	7102042	7101356	529507.PMI1296	529507.PMI0572	0.079	0	0	0	0.569	0	0	0.231	0.668
nuoC	sucC	7102505	7101355	529507.PMI1760	529507.PMI0571	0	0	0	0	0.543	0	0	0.253	0.644
fumC	sucC	7102042	7101355	529507.PMI1296	529507.PMI0571	0.079	0	0	0	0.388	0	0	0.382	0.621
nuoC	fumC	7102505	7102042	529507.PMI1760	529507.PMI1296	0	0	0	0	0.477	0	0	0	0.477
sdhA	sdhC	7101351	7101349	529507.PMI0567	529507.PMI0565	0.902	0	0.644	0	0.904	0.892	0.913	0.712	0.999
frdA	sdhB	7104278	7101352	529507.PMI3588	529507.PMI0568	0.364	0.003	0.772	0	0.985	0.838	0.913	0.834	0.999
frdB	sdhC	7104277	7101349	529507.PMI3587	529507.PMI0565	0.348	0	0	0	0.985	0.837	0.911	0.15	0.999
sdhB	sdhA	7101352	7101351	529507.PMI0568	529507.PMI0567	0.826	0.077	0.778	0	0.985	0.838	0.913	0.776	0.999
frdB	sdhA	7104277	7101351	529507.PMI3587	529507.PMI0567	0.364	0	0.777	0	0.985	0.844	0.913	0.591	0.999
sdhB	sdhD	7101352	7101350	529507.PMI0568	529507.PMI0566	0.821	0	0.588	0	0.658	0.945	0.914	0.272	0.999
sdhA	sdhD	7101351	7101350	529507.PMI0567	529507.PMI0566	0.902	0	0.584	0	0.482	0.841	0.913	0.559	0.999
sdhB	sdhC	7101352	7101349	529507.PMI0568	529507.PMI0565	0.821	0	0.624	0	0.985	0.945	0.914	0.722	0.999
frdA	sdhC	7104278	7101349	529507.PMI3588	529507.PMI0565	0.337	0	0	0	0.904	0.892	0.913	0.7	0.999
sdhD	sdhC	7101350	7101349	529507.PMI0566	529507.PMI0565	0.89	0	0.776	0	0.818	0.945	0.914	0.57	0.999
frdA	frdB	7104278	7104277	529507.PMI3588	529507.PMI3587	0.906	0	0.778	0	0.985	0.844	0.913	0.631	0.999
mdh	fumC	7104099	7102042	529507.PMI3400	529507.PMI1296	0.381	0	0	0	0.394	0.388	0.965	0.812	0.998
frdA	sdhD	7104278	7101350	529507.PMI3588	529507.PMI0566	0.337	0	0	0	0.482	0.841	0.913	0.559	0.997
mdh	maeB	7104099	7102298	529507.PMI3400	529507.PMI1552	0.407	0	0	0	0.259	0.215	0.974	0.62	0.995
frdA	fumC	7104278	7102042	529507.PMI3588	529507.PMI1296	0.381	0	0	0	0.45	0.126	0.965	0.523	0.994
frdB	sdhD	7104277	7101350	529507.PMI3587	529507.PMI0566	0.348	0	0	0	0.476	0.834	0.911	0.128	0.994
fumC	sdhB	7102042	7101352	529507.PMI1296	529507.PMI0568	0.169	0	0	0	0.482	0.12	0.965	0.492	0.992
maeB	fumC	7102298	7102042	529507.PMI1552	529507.PMI1296	0.428	0	0	0	0.071	0.119	0.974	0.439	0.991
fumC	sdhA	7102042	7101351	529507.PMI1296	529507.PMI0567	0.381	0	0	0	0.45	0.126	0.965	0.283	0.991
fumC	sdhC	7102042	7101349	529507.PMI1296	529507.PMI0565	0	0	0	0	0.609	0.119	0.965	0.19	0.989
frdB	fumC	7104277	7102042	529507.PMI3587	529507.PMI1296	0.169	0	0	0	0.482	0.12	0.965	0.232	0.988
mdh	maeA	7104099	7101426	529507.PMI3400	529507.PMI0642	0.381	0	0.161	0	0.165	0.215	0.951	0.421	0.988
fumC	maeA	7102042	7101426	529507.PMI1296	529507.PMI0642	0.381	0.27	0	0	0.071	0.119	0.965	0.11	0.986
mqo	fumC	7102669	7102042	529507.PMI1931	529507.PMI1296	0.068	0	0	0	0.087	0	0.965	0.122	0.971
fumC	sdhD	7102042	7101350	529507.PMI1296	529507.PMI0566	0	0	0	0	0.07	0	0.965	0	0.966
mqo	maeB	7102669	7102298	529507.PMI1931	529507.PMI1552	0.066	0	0	0	0.126	0	0.9	0.175	0.923
maeB	maeA	7102298	7101426	529507.PMI1552	529507.PMI0642	0.064	0.005	0	0.605	0.062	0.398	0.8	0.766	0.915
mqo	maeA	7102669	7101426	529507.PMI1931	529507.PMI0642	0.053	0	0	0	0	0	0.9	0.109	0.908
frdB	sdhB	7104277	7101352	529507.PMI3587	529507.PMI0568	0	0	0.778	0.828	0	0	0.8	0.045	0.826
frdA	sdhA	7104278	7101351	529507.PMI3588	529507.PMI0567	0	0	0.778	0.843	0	0	0.8	0	0.824
mdh	sdhA	7104099	7101351	529507.PMI3400	529507.PMI0567	0.381	0	0.206	0	0.34	0.192	0	0.415	0.818
mdh	mqo	7104099	7102669	529507.PMI3400	529507.PMI1931	0	0	0	0	0	0	0.8	0.125	0.817
frdB	mdh	7104277	7104099	529507.PMI3587	529507.PMI3400	0.381	0	0.168	0	0.474	0.179	0	0.281	0.81
mdh	sdhB	7104099	7101352	529507.PMI3400	529507.PMI0568	0.381	0	0.168	0	0.474	0.179	0	0.281	0.81
frdA	mdh	7104278	7104099	529507.PMI3588	529507.PMI3400	0.381	0	0.204	0	0.34	0.192	0	0.381	0.807
maeB	sdhA	7102298	7101351	529507.PMI1552	529507.PMI0567	0.393	0	0	0	0.132	0	0	0.405	0.659
frdA	maeB	7104278	7102298	529507.PMI3588	529507.PMI1552	0.393	0	0	0	0.132	0	0	0.405	0.659
mdh	sdhC	7104099	7101349	529507.PMI3400	529507.PMI0565	0.381	0	0	0	0.357	0	0	0.157	0.635
mqo	sdhA	7102669	7101351	529507.PMI1931	529507.PMI0567	0	0	0	0	0.093	0.119	0.547	0.061	0.614
frdA	mqo	7104278	7102669	529507.PMI3588	529507.PMI1931	0	0	0	0	0.093	0.119	0.547	0.061	0.614
[truncated: 1,078 more rows]

## Sheet: GPIN
#node1	node2	node1_string_internal_id	node2_string_internal_id	node1_external_id	node2_external_id	neighborhood_on_chromosome	gene_fusion	phylogenetic_cooccurrence	homology	coexpression	experimentally_determined_interaction	database_annotated	automated_textmining	combined_score
[truncated: 65,535 more rows]
